# Supplementary material for: Placental epigenetic clocks: estimating gestational age using placental DNA methylation levels
Source: PubMed Central journal article supplement (PMC6628997; doi:10.18632/aging.102049), 2019-06-24
Supplement: aging-11-102049-s002.pdf [file aging-11-102049-s002.pdf]

## SUPPLEMENTARY FIGURES

This file includes figures that display the predictions of the RPC and other DNAm-based chronological age estimators. To elucidate the robustness of the RPC, the data points in the figures were colored according to pregnancy trait, fetal sex and ethnicity. This file includes a flow chart that describes the composition of training and test data for the CPC.

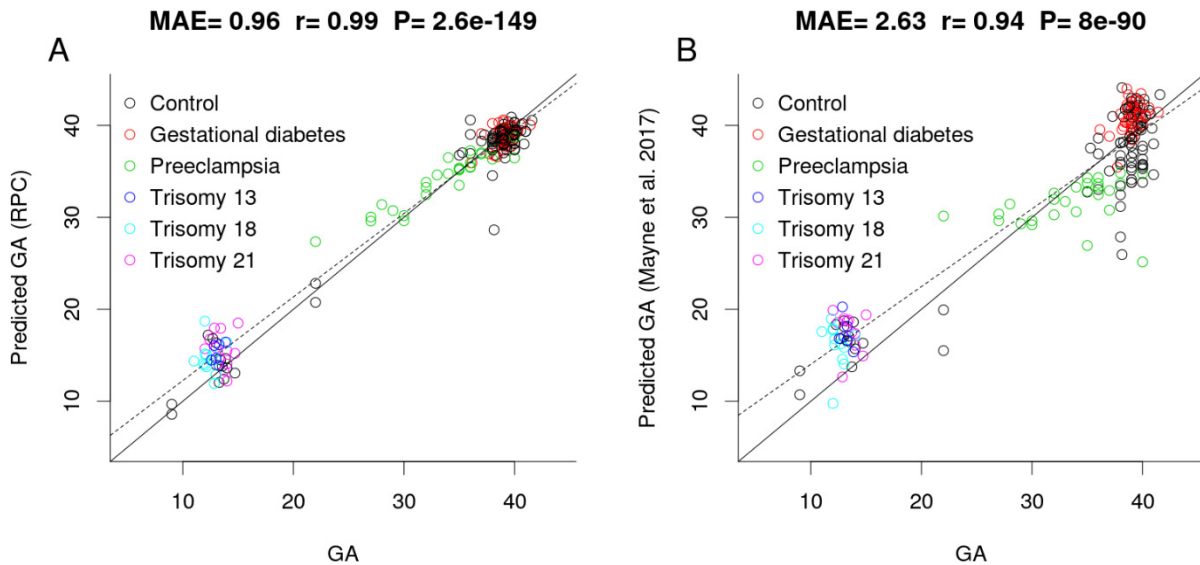

**Figure S1. Gestational age estimation by the RPC and Mayne et al. (2017)'s placental clock according to pregnancy complications or congenital malformations.**

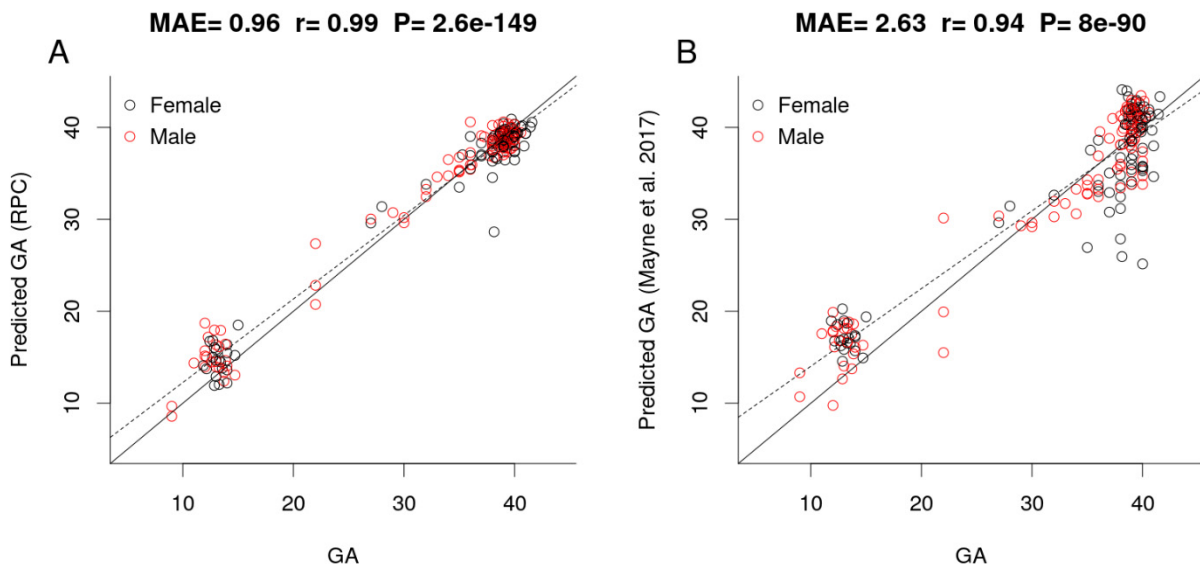

**Figure S2. Gestational age estimation by the RPC and Mayne et al. (2017)'s placental clock according to fetal sex.**

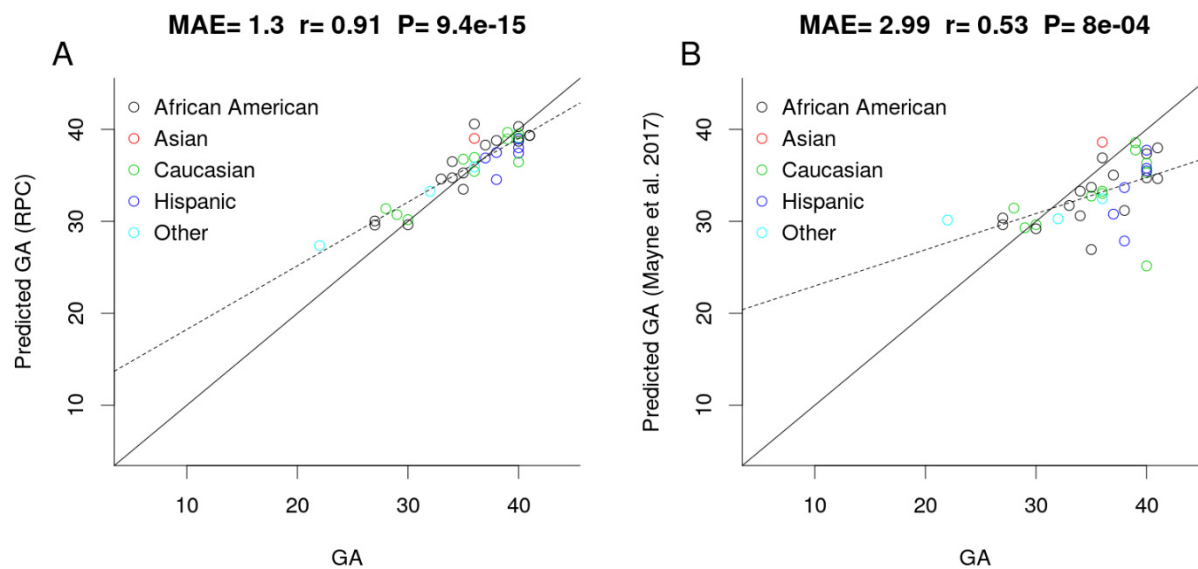

**Figure S3. Gestational age estimation by the RPC and Mayne et al. (2017)'s placental clock according to ethnicity.**

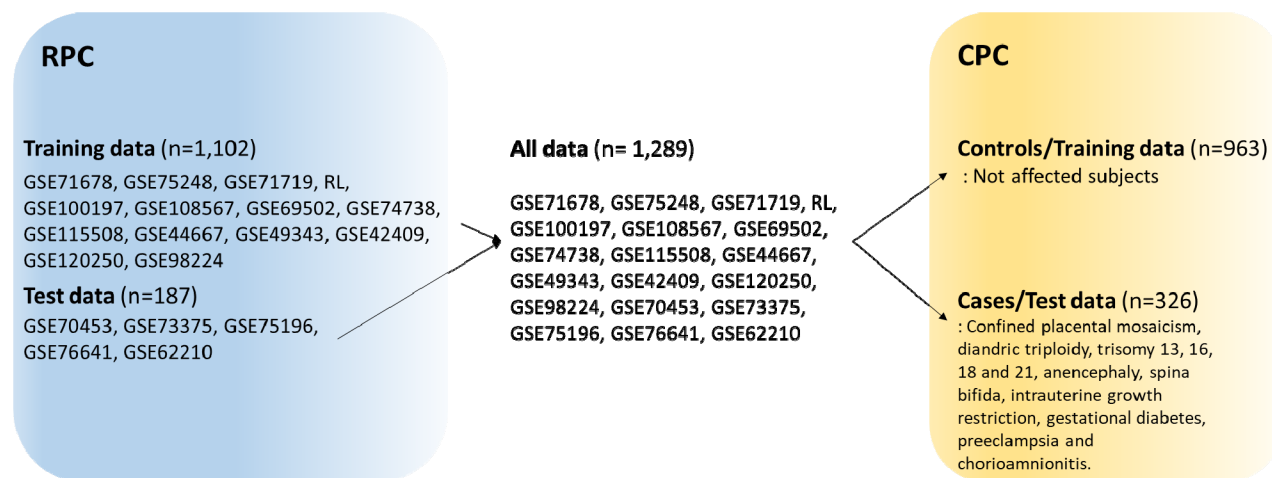

**Figure S4. Forming training and test data for the CPC.**

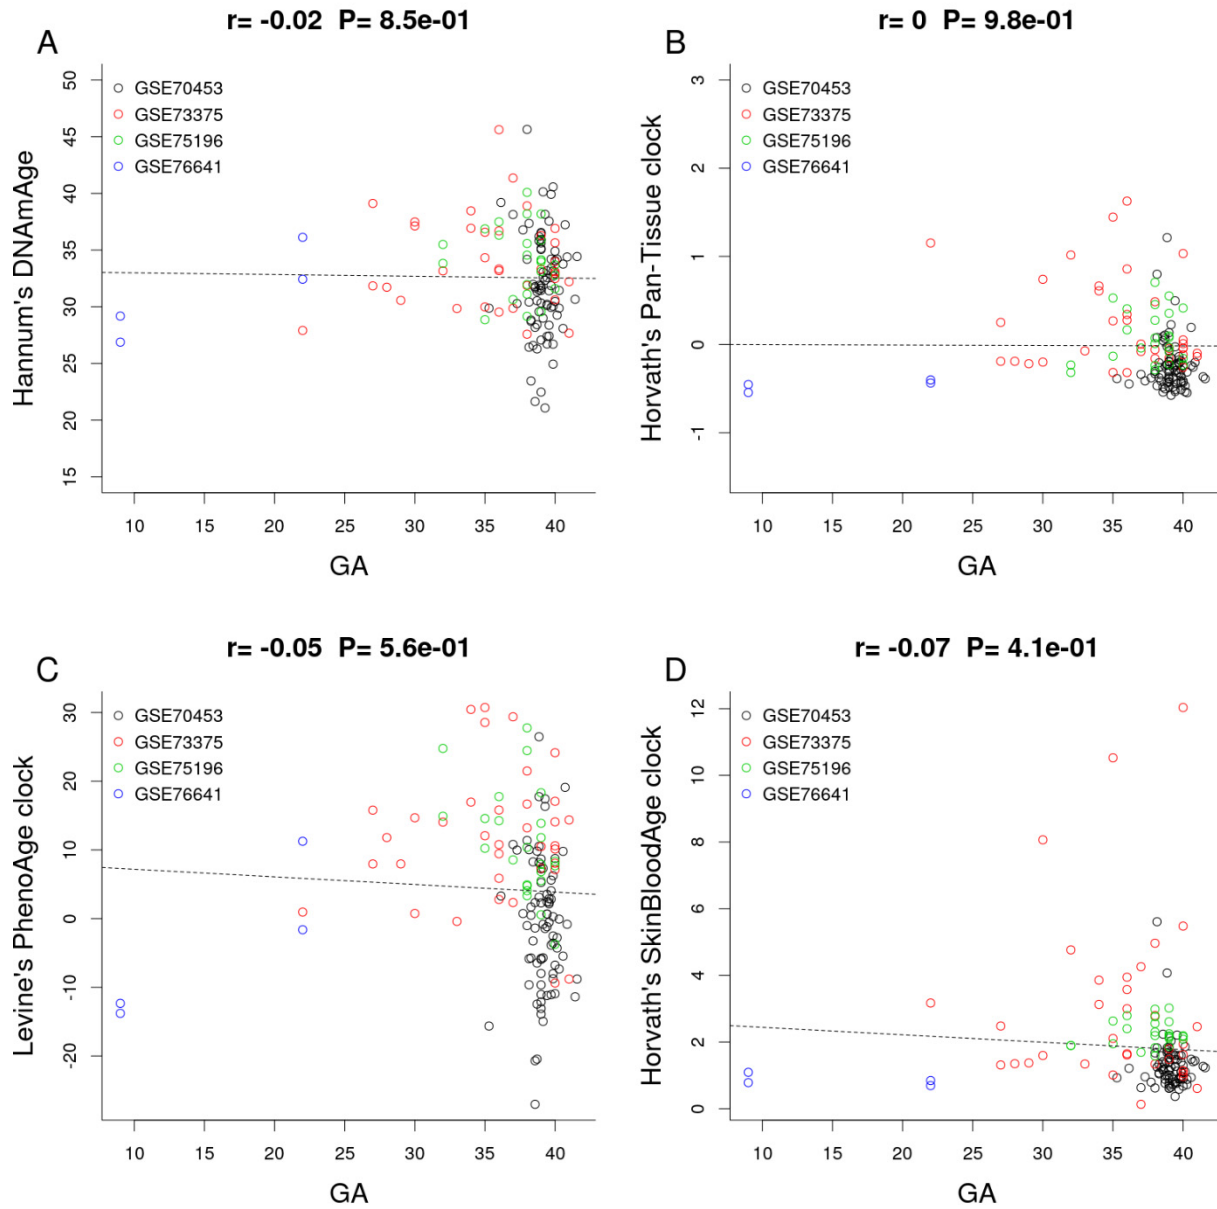

**Figure S5. Gestational age estimation by different epigenetic clocks (Hannum et al. (2013)'s blood based clock, Horvath (2013)'s pan-tissue clock, Levine et al. (2018)'s PhenoAge clock and Horvath et al. (2018)'s Skin & Blood clock).**

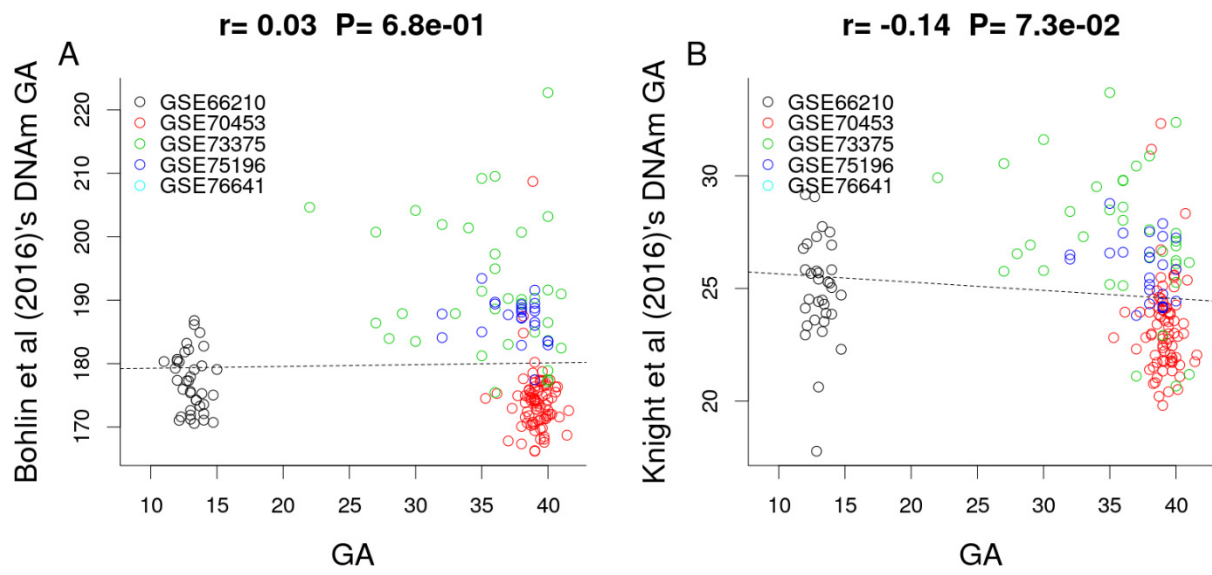

**Figure S6. Gestational age estimation by the cord blood clocks developed in Bohlin et al. (2016) and Knight et al. (2016).**
