# Supplementary material for: Placental epigenetic clocks: estimating gestational age using placental DNA methylation levels
Source: Aging (Albany NY). 2019 Jun 24;11(12):4238–53. doi: 10.18632/aging.102049 (PMC6628997; doi:10.18632/aging.102049)
Supplement: Supplementary File 1 [file aging-11-102049-s001.csv]

CpGs	Coefficient_RPC	Coefficient_CPC	Coefficient_refined_RPC	Coefficient_sex_classifier
(Intercept)	24.99772133	13.0618205	30.74966212	1.801243875
cg00009871	-0.124656981	0	-0.818616197	0
cg00035630	-0.006478271	0	0	0
cg00056066	0.859460073	0.01974736	0.167224428	0
cg00057476	0.372322642	0.782812279	0.349374104	0
cg00063979	-0.509028605	0	-1.067895523	0
cg00073090	-0.189317014	-0.14498105	-0.869781019	0
cg00083059	0	-0.149133485	0	0
cg00091483	0.765878707	0.939841487	0.435366852	0
cg00108098	0	0.105542628	0	0
cg00112465	0	-0.080623677	0	0
cg00173659	-0.17820455	-0.536878343	0	0
cg00173799	0	0.014656666	0	0
cg00192031	0.763946083	0	0.578291137	0
cg00232735	0	0	0	0.096475294
cg00239899	-0.223482954	0	-0.015465747	0
cg00242950	0	0	0	1.332784068
cg00253398	0	-0.261466517	0	0
cg00307685	0.223044907	0.133774014	-0.744881912	0
cg00378510	0	0.203348021	0	0
cg00384701	0	0	0	0.815899909
cg00398130	0.20993209	0	0.014211648	0
cg00400547	0.985498912	0.850095834	0.883495312	0
cg00419702	-0.085355785	-0.046808806	0	0
cg00423969	0	0.201820368	0	0
cg00451105	0	-0.235564174	0	0
cg00466827	0.009702718	0.169153008	0	0
cg00469856	-0.079049692	0	0	0
cg00501482	-0.373772622	0	-0.117397178	0
cg00521434	1.693619118	2.171649473	3.436294138	0
cg00530564	0	1.052555164	0	0
cg00595223	-0.004757362	0	0	0
cg00604454	0	0.197266727	0	0
cg00639010	-1.933017622	-2.901245499	-1.566600997	0
cg00674365	0.007646539	0	1.034186667	0
cg00675037	-0.180097612	0	-0.72140753	0
cg00689492	0	0	0	-0.067280083
cg00705661	-2.810021278	-2.702840998	-1.781051455	0
cg00721170	0.046120484	0	0.257589447	0
cg00739353	0	0	0	11.33708241
cg00766497	0.259314777	0	0.892964526	0
cg00789143	0	0	0	-0.36560755
cg00846036	0	0	0	0.081150389
cg00896578	-0.006801355	-0.347994082	-0.085779139	0
cg00898013	0	0.150787075	0	0
cg00971110	0	0.084752683	0	0
cg01075918	-0.929415286	-0.925987919	-1.310650345	0
cg01079860	0	0.037680375	0	0
cg01093285	0.260152179	0	0.321235997	0
cg01105385	0	0	0	0.011691808
cg01118711	0.54626814	0	1.078424983	0
cg01152073	-3.372469407	-5.4948629	-0.429123245	0
cg01164202	0	0.000435573	0	0
cg01224366	0.083802782	0	0	0
cg01233392	0.914376222	0.851614486	1.543554751	0
cg01272599	0.485386007	0	0.474702067	0
cg01284448	-0.201723469	0	-0.068395	0
cg01285706	0.125494207	0	0	0
cg01307115	0	0.696522065	0	0
cg01333011	0	-0.211972195	0	0
cg01340347	-0.052845969	0	0	0
cg01342746	0	0.403844569	0	0
cg01376763	0.224156657	0	0.271918727	0
cg01397912	0	-0.236292649	0	0
cg01427957	-0.064000008	0	0	0
cg01432902	0	0	0	-0.135548633
cg01440070	0	0	0	-3.418767111
cg01448132	0	-0.580180851	0	0
cg01452847	0	0	0	0.317146666
cg01471196	0.035002098	0	0	0
cg01508380	0.844332231	0	3.976688134	0
cg01509843	0.055210566	0	0.350969353	0
cg01516372	0.098277963	0	0.580103821	0
cg01542644	-5.156925426	0	-4.019832166	0
cg01550716	0.253157333	0	0.877442387	0
cg01589860	-0.066155991	0	0	0
cg01597604	-0.004851522	0	0	0
cg01682784	0	-0.30061438	0	0
cg01691182	0	-0.063266812	0	0
cg01709677	0.583018753	1.628083946	0	0
cg01718116	0.080934135	0.050773104	0	0
cg01735082	0	0.302553135	0	0
cg01748414	0	0.070627113	0	0
cg01766908	-0.182345044	0	0	0
cg01768926	0	-0.177730454	0	0
cg01824511	0	0.287744466	0	0
cg01825213	-0.173684267	0	-0.064946293	0
cg01837533	0	0	0	1.032875382
cg01904393	4.003734275	2.920682872	5.037356282	0
cg01958723	-0.101009081	0	0	0
cg01960128	-0.089661259	0	-0.397769779	0
cg01979888	0	0.565162504	0	0
cg01987353	0	0	0	-0.902100895
cg02012338	-1.235381981	-0.237253802	-1.456467635	0
cg02020969	0.156395878	0	0.148359733	0
cg02057688	0.112750567	0	0.704059184	0
cg02069715	0.003619915	0	0	0
cg02072366	0	0	0	0.158217839
cg02081841	0	0	0	-0.247560276
cg02098565	0	-0.011841488	0	0
cg02168857	0	0.399350869	0	0
cg02248037	0.621273556	0.235269391	0	0
cg02252421	0	-0.188367323	0	0
cg02266500	0	-0.337335862	0	0
cg02288791	0	0.084157618	0	0
cg02292263	0.404404024	0.570976762	0.278425443	0
cg02300114	0	0	0	-0.517655055
cg02313836	0.046325832	0	0.106674531	0
cg02343823	0	0	0	-0.866864025
cg02357404	0.030147134	0.385932488	0.444682346	0
cg02360514	0	0.816380563	0	0
cg02366228	0	-0.36220177	0	0
cg02376097	0	0.84211002	0	0
cg02388882	0.367154336	0.559307297	0.982142254	0
cg02399044	0	-0.882174207	0	0
cg02399571	1.088793578	0.400232198	0	0
cg02452418	0	0	0	0.419099874
cg02461114	-0.166914893	0	0	0
cg02463440	0	-0.009244948	0	0
cg02481256	0	0.195462279	0	0
cg02492818	-0.577721148	-0.249527624	-0.142184578	0
cg02555243	0	0	0	0.121579181
cg02561726	-0.266556531	0	-0.331501044	0
cg02603128	-0.021415955	0	0	0
cg02609848	0.384122747	0	0.535803375	0
cg02625623	0	0	0	-0.448759153
cg02634272	-0.053160075	0	-0.028844263	0
cg02657611	0.832658185	0.750553909	0.313160938	0
cg02666302	0	0	0	0.047759735
cg02690256	0	-0.141556164	0	0
cg02725453	0	0	0	-0.603438086
cg02730055	-0.173012935	0	0	0
cg02737268	-0.835808199	-0.657602923	-0.250430119	0
cg02784694	-0.33523452	0	-0.675229237	0
cg02789362	0	0.112908648	0	0
cg02795629	0	0.30652255	0	0
cg02819828	0	-0.028160109	0	0
cg02876466	0	0	0	-0.14507039
cg02884820	-0.013629871	0	-0.111280248	0
cg02886578	0	0	0	-1.334431547
cg02927252	0	0	0	-0.559080431
cg02930132	0	0	0	2.012107275
cg02935272	0.002027866	0	-1.851444934	0
cg02955631	0	-0.027201559	0	0
cg02957094	0	0.11204365	0	0
cg02959759	0	0	0	0.547010002
cg03009240	0	0	0	-0.289301377
cg03020916	-0.15466474	0	-0.144954919	0
cg03022050	0	0.342693355	0	0
cg03026524	0	0	0	0.126703163
cg03079497	-0.169905041	-0.463788367	0	0
cg03099208	0	0	0	0.338324579
cg03108347	0	0	0	2.229041647
cg03117976	0	0.300222865	0	0
cg03120116	0	-0.079804298	0	0
cg03141090	-0.550592649	-0.239110143	-1.398462467	0
cg03199192	0	0	0	1.368119914
cg03213833	-0.072596187	0	-0.336570975	0
cg03218192	0	0	0	4.510462491
cg03233793	0	0	0	0.124099795
cg03261929	0.038244654	0	0	0
cg03307911	-0.555539152	0	-0.911241186	0
cg03327643	0	0	0	-1.29022888
cg03340318	0	0	0	0.197068134
cg03352106	0.063323311	0	0.301243536	0
cg03361973	-0.123290597	-0.601809894	-1.522868517	0
cg03384175	0	0	0	0.159849166
cg03441945	0.172159136	0.346774816	1.699529148	0
cg03477252	0	-0.308313477	0	0
cg03543893	-0.028899552	-0.168306625	-0.075295891	0
cg03577655	0.011522136	0	0	0
cg03578464	0	-0.57650804	0	0
cg03603214	0	-0.353922628	0	0
cg03607359	0	-0.001995387	0	0
cg03614916	0	0	0	1.670774161
cg03618918	0	0	0	-2.13294489
cg03634778	0	-0.127149964	0	0
cg03655174	-0.036114384	-0.577256538	-0.621953114	0
cg03687700	0	0	0	4.228458811
cg03707256	0	0	0	0.024689314
cg03730703	0.879163023	0.523784135	1.279371201	0
cg03732020	-1.568683925	-0.306353737	-2.019414367	0
cg03749198	-0.091940778	0	0	0
cg03753454	-0.582252424	0	-1.008052852	0
cg03778669	0	0.381354885	0	0
cg03789420	0	-0.542135311	0	0
cg03826976	0	0	0	0.300206143
cg03836586	-0.008955516	0	0	0
cg03867465	0.024464921	0.087866223	0.480678639	0
cg03880841	1.938789455	0	1.594570555	0
cg03902093	0	0	0	-2.061988202
cg03930369	0	-0.130170989	0	0
cg03946955	-0.071854858	0	-1.044407188	0
cg03965044	0	-10.76500802	0	0
cg03974689	0	1.40544579	0	0
cg03979241	0.850622876	0.906457154	0.838391173	0
cg03984347	0	0	0	0.852876391
cg03989020	0	-0.331676733	0	0
cg03991547	0.109461888	0	0.137069501	0
cg04006042	0	1.80955555	0	0
cg04011474	-0.127294534	0	0	0
cg04012797	-0.586530598	-0.040209879	0	0
cg04016621	-0.292546208	0	-0.023122061	0
cg04017672	0.709950926	0	0	0
cg04035553	0	-0.126294217	0	0
cg04046945	1.269188815	0.188700237	0.629134227	0
cg04085339	0	0	0	2.242804698
cg04102734	0	0	0	-1.024504592
cg04103761	0.068378961	0	0	0
cg04110105	-0.110262348	0	0	0
cg04139849	-0.154860933	0	0	0
cg04149585	0	0.385202777	0	0
cg04154825	0	-0.205642627	0	0
cg04184716	0.473097908	0	0.567730367	0
cg04191989	-0.224704	-0.082870391	-0.08202904	0
cg04246521	1.32500318	0	0.984260366	0
cg04258219	-0.45855431	0	-0.398948784	0
cg04271289	0	-0.240341059	0	0
cg04387835	0	0.009182274	0	0
cg04390523	0	-3.274752586	0	0
cg04405075	0	0	0	0.241827361
cg04411052	1.572283822	0	0	0
cg04431946	-0.085367873	0	-0.873094437	0
cg04435320	-0.217288569	0	0	0
cg04448141	0	-0.092484216	0	0
cg04452040	0	0.113915279	0	0
cg04474049	-0.515138471	0	-0.773344444	0
cg04489548	0	0.284688537	0	0
cg04498198	0	0.025440697	0	0
cg04501188	1.507856941	0	5.091061927	0
cg04507915	0	0.113353292	0	0
cg04523603	0	0	0	-0.359774012
cg04576672	0.238973993	0	0	0
cg04671541	-0.066970861	0	-0.018987185	0
cg04675542	0	0	0	-0.536123192
cg04689080	0	-2.118702893	0	0
cg04702354	0.340510662	0	1.779485984	0
cg04706327	-0.07700366	0	0	0
cg04721719	-0.002876918	0	-0.258994847	0
cg04731926	0	0	0	0.509383707
cg04741211	0.465189868	0	0.49398341	0
cg04771206	0.164508209	0	0.508995972	0
cg04793989	0	-0.040747239	0	0
cg04838191	0	0	0	-0.313032172
cg04912999	0	-0.370756915	0	0
cg04915058	0	0	0	0.748581285
cg04959815	0	0	0	0.00337898
cg04961189	-0.130694259	0	0.228107784	0
cg04973802	-0.101285849	0	0.000929233	0
cg05003175	0	-0.045980295	0	0
cg05022378	0	-0.018722499	0	0
cg05054910	-0.272705619	0	-0.352141882	0
cg05084827	0	-0.274901586	0	0
cg05097579	0	0.057900337	0	0
cg05098880	0	0.091414789	0	0
cg05128194	0	-0.19770178	0	0
cg05169312	0.934093677	0.273192487	1.05859981	0
cg05169846	0	0	0	0.233838619
cg05198297	0.261930768	0	0.292913647	0
cg05199503	0	-0.022169462	0	0
cg05200057	0	0.438462305	0	0
cg05228717	-0.040859297	0	0	0
cg05256179	-0.029718333	0	0	0
cg05283184	0	0.297595434	0	0
cg05304393	0.445015521	0.228743995	1.721512755	0
cg05308656	0.876001092	0.378449348	0.07480551	0
cg05321252	0.446769433	0.416991321	0.594097717	0
cg05340495	-0.596590691	0	-1.046545689	0
cg05342240	0	0	0	-0.180221252
cg05345286	0.087497869	0	0	0
cg05355436	-0.239495752	-0.283650059	0	0
cg05373339	0.169772673	0	0.540497479	0
cg05393023	0	0.010083148	0	0
cg05398095	0	0	0	-0.981157708
cg05404233	1.395442074	0	1.897713298	0
cg05486907	0	0	0	-0.258584726
cg05498905	-0.149685502	-0.055977251	-0.368823421	0
cg05529152	0.01119154	0	0.950860755	0
cg05634630	-0.047244457	0	-0.758049238	0
cg05640294	0	0	0	0.149800973
cg05676377	-0.402332772	0	-0.421349155	0
cg05689413	-0.927340109	-0.746337416	-0.242320896	0
cg05700079	0.097468689	0	0	0
cg05740575	0	-0.161331452	0	0
cg05750598	0.043701829	0	0	0
cg05761882	-0.11327397	-0.001328194	0	0
cg05773312	-0.28303577	0	-0.145458295	0
cg05862431	-1.225188423	0	0	0
cg05875982	2.877538783	1.356864885	1.94832249	0
cg05878887	0.015709247	0	0.056877221	0
cg05898881	0	-0.11956479	0	0
cg05918355	-0.065402526	0	-0.543096315	0
cg05922384	-0.16378594	0	-0.304913947	0
cg05926837	0	0	0	-0.373552631
cg05928806	0	0	0	0.25556665
cg05969378	0	0	0	-0.437839657
cg06013117	0	0.406038368	0	0
cg06042565	0.411412809	0	0.87500083	0
cg06095093	0	1.473974845	0	0
cg06171787	0	0.022090927	0	0
cg06191390	1.922797463	0.152695396	1.647827622	0
cg06214997	0	0	0	-0.086279189
cg06285648	0	-1.343089906	0	0
cg06292076	-0.105698351	0	0	0
cg06295928	-0.109474496	0	-0.204664915	0
cg06300141	0	0.259689026	0	0
cg06327515	0	0.165313436	0	0
cg06447795	0	-1.243519154	0	0
cg06479057	1.427240117	0	1.541152385	0
cg06488655	0.054601952	0	0	0
cg06527919	0	0	0	-0.420800354
cg06551595	0.108561738	0	0.33561724	0
cg06566039	0.418374304	0.145491976	0	0
cg06622892	-0.678154949	0	0	0
cg06636938	-0.181541053	-0.355329741	-0.703805458	0
cg06638529	0	0.056173701	0	0
cg06653796	0	-0.53348857	0	0
cg06683487	-0.073632841	0	-0.175522788	0
cg06710937	0	0	0	0.915718403
cg06713675	0	0	0	0.416048187
cg06735598	0	-0.168776243	0	0
cg06747745	-3.18570751	-3.359786774	0	0
cg06754565	-0.897966753	0	-1.850051378	0
cg06784691	0	1.679856877	0	0
cg06799979	0	0.621645006	0	0
cg06847828	0	0.093767544	0	0
cg06848775	0.502546909	0.984053124	0.83124545	0
cg06878361	0	0	0	0.031526239
cg06903010	0	-0.011688894	0	0
cg06911238	0	-0.008751977	0	0
cg06960461	0.025289221	0.365829559	0.474246729	0
cg06963709	-0.111191498	0	0.147508064	0
cg06974871	0	0.463017506	0	0
cg07003542	-0.310967923	0	-0.650151203	0
cg07025505	-0.162092691	-0.565966334	-0.755999593	0
cg07039180	0.029431612	0	0.277726112	0
cg07056242	0	-0.6483735	0	0
cg07083023	0	0.292081124	0	0
cg07110488	-2.420929418	0	-0.070845734	0
cg07127762	0	-0.045774328	0	0
cg07152001	0.068983271	0.204443836	0.41454446	0
cg07158434	0.269259147	0	0	0
cg07159758	0.434834023	0	0.91475133	0
cg07173823	0	0	0	0.553544426
cg07176589	0	-0.30495807	0	0
cg07178977	0	0	0	0.497639394
cg07180988	0	-0.056572569	0	0
cg07191594	0.460731732	1.297421696	0	0
cg07256732	0.867057254	0	0	0
cg07315234	0	0.002839742	0	0
cg07348845	0	0	0	0.024784548
cg07395354	0.114292127	0	0.016756968	0
cg07475178	0	0	0	1.327493402
cg07520506	0	0	0	1.265143622
cg07522913	0.03018167	0	0	0
cg07550331	0	-0.02699086	0	0
cg07571202	0	-0.057329477	0	0
cg07591186	1.006695614	0.395163001	1.137863171	0
cg07620573	-0.306896223	0	-0.087697373	0
cg07634706	0.627140313	0	0	0
cg07756635	0	0.020756504	0	0
cg07760622	-0.256913637	0	-0.20204424	0
cg07760794	0	0.341347784	0	0
cg07794981	0	0	0	0.030668861
cg07813851	0	0	0	-0.637737864
cg07847030	0.156565095	0.154857902	0.33511741	0
cg07890839	0	0	0	-0.378742118
cg07900024	-0.043290484	0	-0.122541934	0
cg07987148	-0.39803987	0	-0.010368457	0
cg07991112	0	0.016032325	0	0
cg08006309	-2.596318801	-1.621534452	-3.351938329	0
cg08016257	-1.325398313	-2.528841655	-3.162702012	0
cg08016383	0	0.079734645	0	0
cg08062469	-0.018864479	0	0	0
cg08126798	0	-0.002511359	0	0
cg08235984	0	0.012476723	0	0
cg08259810	0	0	0	0.282733949
cg08269911	0	0.321769418	0	0
cg08276042	0	-0.04541659	0	0
cg08289409	0.090705757	0.323769753	0.21771599	0
cg08313539	0	0	0	0.444952833
cg08355702	0.413403405	0	1.174280384	0
cg08367801	0	0.166025457	0	0
cg08369368	0	0.276965528	0	0
cg08371391	-0.181496438	0	-1.313947851	0
cg08389497	2.140696255	0	0.943954167	0
cg08395793	-0.178796512	0	0	0
cg08486180	0	0.100642269	0	0
cg08493294	0.126261421	0	0	0
cg08542473	0	0	0	-0.225913488
cg08549810	0	0	0	-0.714998986
cg08569850	0	-0.241881454	0	0
cg08581745	-0.044508095	0	-0.536029965	0
cg08642111	0	0	0	0.839677358
cg08680528	1.68778911	0.564550656	0.220958735	0
cg08718490	0	0.001846316	0	0
cg08787268	0	0.276372662	0	0
cg08804892	0	0.582681414	0	0
cg08811314	0	0.980767163	0	0
cg08814105	0	0	0	-0.373587943
cg08815081	0.054470802	0	0.705118779	0
cg08881019	0	-0.050022413	0	0
cg08885224	0.099103465	0.059276853	0.44709379	0
cg08920210	0.096181591	0.410630547	0.366061271	0
cg08942342	0	0.018460221	0	0
cg08947894	0.306769784	0	0	0
cg08954353	0.7738724	0.404922845	0.497423487	0
cg08957484	0	0.014733963	0	0
cg08978665	-0.19936767	-0.006857662	-0.265107907	0
cg08988364	0	0.016733307	0	0
cg09015905	-0.085129591	-0.440784966	-0.036421201	0
cg09079580	0	0.40621803	0	0
cg09154850	0.609574225	0	1.269459773	0
cg09163779	1.106439667	0	2.564371024	0
cg09180564	0	-0.137895388	0	0
cg09207718	0	0	0	0.673133507
cg09253696	-0.185410567	0	0	0
cg09267815	0	-0.007377133	0	0
cg09294095	0	-0.11663744	0	0
cg09338032	0.009400021	0.09799591	0.616837996	0
cg09355771	-0.08455239	0	0	0
cg09364122	-0.697978812	-1.619141512	-1.693011375	0
cg09426834	0	0	0	-0.400796432
cg09435668	0	0	0	0.833670405
cg09480837	0	0	0	1.644364377
cg09491410	0	0	0	-0.68829598
cg09502069	0.136614932	0	0.014443911	0
cg09530108	-0.871800768	-0.58377322	0	0
cg09532898	0	0.538423744	0	0
cg09566302	0.920240937	0	1.397334548	0
cg09567485	0.756118796	0	0	0
cg09597767	-0.774412165	0	0	0
cg09601882	0	0	0	0.25575706
cg09610987	0.048719962	0	0	0
cg09618893	0	-0.237035779	0	0
cg09679939	0	-0.024448358	0	0
cg09692396	-0.1218961	0	-0.275876046	0
cg09704168	-0.151360261	-0.750682287	0	0
cg09779044	0	0	0	-7.092342243
cg09816471	0.160903082	0	0	0
cg09830308	-0.050144779	0	0	0
cg09850632	0.892088601	0	0	0
cg09881253	0	0	0	-0.383678301
cg09888562	0.062348932	0	0	0
cg09894284	0	-0.427334998	0	0
cg09935792	0.057910431	0	0.684816203	0
cg09936400	-0.466497234	-0.419651938	-0.426549393	0
cg09971754	0	0	0	-8.088667193
cg10000096	0.884709128	0.629056073	2.604120622	0
cg10022966	0	-0.148589537	0	0
cg10033475	0	0.013132226	0	0
cg10097150	-0.295317004	0	-0.774069718	0
cg10121113	0.062305322	0	0.488808312	0
cg10123662	0	0	0	-0.374114588
cg10124440	0	0.48966802	0	0
cg10150962	0	-0.000794401	0	0
cg10214581	0	0	0	-0.010897066
cg10241183	0	-0.579765599	0	0
cg10255171	0.016891443	0	1.121774353	0
cg10277523	-0.043489795	0	0	0
cg10292915	-0.014125685	0	-0.174245927	0
cg10341154	0	-0.49111482	0	0
cg10361167	-0.007119973	0	0	0
cg10419556	0	-0.077326226	0	0
cg10432569	-0.185081502	-0.387417059	-0.108223137	0
cg10477905	0	-0.024681784	0	0
cg10482057	-0.000316022	0	0	0
cg10485411	0	0	0	1.60896228
cg10599900	-0.009422641	0	-1.209177334	0
cg10605064	-0.377358306	-0.07149096	-0.536118973	0
cg10608230	-0.203390662	-0.628657783	-0.564416288	0
cg10655499	0	0.213142355	0	0
cg10707775	-0.463347884	0	-3.559536383	0
cg10715223	-0.919639326	-1.76659582	-2.041084688	0
cg10717214	-0.38118478	0	0	0
cg10737521	-0.496103047	-0.089591057	-0.778069192	0
cg10750182	-0.233873777	-0.928977648	-0.11843335	0
cg10761804	1.51621669	1.453081368	0.952834989	0
cg10802414	0	0.295939551	0	0
cg10806146	0	0	0	-1.19845969
cg10812708	0	0.047945015	0	0
cg10830713	0	0.852090271	0	0
cg10835286	0	0.668591915	0	0
cg10835651	0	-0.518088808	0	0
cg10861722	0	0	0	0.373427952
cg10938556	-0.043908607	0	0	0
cg10978966	0.493997409	0	0.503638031	0
cg10984165	0	0	0	0.095406386
cg10991599	0.823408879	0.247123231	0.832149654	0
cg11070260	0	0.114182871	0	0
cg11077171	0	0	0	-1.23762278
cg11095319	1.167407099	0	0.316596815	0
cg11144229	0	0.18481315	0	0
cg11160572	-1.32754176	0	0	0
cg11228758	0	0.193515401	0	0
cg11284797	0	-0.058523948	0	0
cg11316146	0	0	0	-0.351769334
cg11387705	-0.234138731	-0.120473864	-0.305481979	0
cg11388673	0	0	0	-0.674394853
cg11410882	0	0.029543155	0	0
cg11421724	0	0.497515977	0	0
cg11436143	0	0	0	0.259072145
cg11444704	0	1.073297401	0	0
cg11453174	0.0972395	0	0	0
cg11480029	-0.011598515	0	-0.095717386	0
cg11495062	0	0	0	-0.063687436
cg11516031	0.366420787	0.195123312	0.967692293	0
cg11518454	-0.104308386	0	-0.107998156	0
cg11547667	-0.094713796	-0.007951506	-1.30838447	0
cg11569478	-2.208961968	-1.271674404	-1.366100385	0
cg11677744	0.003391145	0	0.2183727	0
cg11685391	-0.129297169	0	-1.439712386	0
cg11691535	0.027762443	0	0.736633589	0
cg11710211	0	-0.223041231	0	0
cg11782635	-0.252977004	0	-0.438080437	0
cg11796996	0	0	0	-0.319922756
cg11798873	-1.588765785	-0.605324462	0	0
cg11841231	0	0	0	-0.763913686
cg11841722	-0.675155491	-1.835320946	-0.057103375	0
cg11847543	0.219469887	0.115492614	0.726024323	0
cg11861562	0.347067866	0.072587966	0	0
cg11874123	0	0	0	0.27223908
cg11908202	0.255020906	0.060147621	0	0
cg11916219	-0.247345143	0	-0.624960403	0
cg11920449	-0.123148645	0	0	0
cg11929154	0	1.075024157	0	0
cg11941633	0.002989785	0	0	0
cg11953334	0	-0.151346812	0	0
cg11977686	0	0.157127459	0	0
cg11999255	0	0.009442863	0	0
cg12013591	0.631149614	0.895310167	1.29692295	0
cg12016792	0	-0.018851398	0	0
cg12027248	0	0	0	-0.072810073
cg12077698	-0.074449874	0	0	0
cg12094174	0	0.149712505	0	0
cg12140144	0	0.026063483	0	0
cg12164282	0	0	0	-0.231188898
cg12192145	-0.035907905	0	-0.619342456	0
cg12195314	0	-1.015710784	0	0
cg12204423	0	0	0	-10.81630842
cg12220058	0	0	0	-0.028704328
cg12244325	0	0	0	0.457524701
cg12269002	0	-0.075085811	0	0
cg12495801	0	-0.482088767	0	0
cg12498094	0.389226707	0.924373306	0.759827789	0
cg12517027	0	0	0	-0.981738531
cg12521167	0.299737819	0	0.502278224	0
cg12551957	-0.400089223	0	-1.147666463	0
cg12570716	0	-0.300113685	0	0
cg12577850	0	0.103783475	0	0
cg12608727	0.074659296	0.515905037	0.866406471	0
cg12609526	0.144694518	0	2.016614828	0
cg12646820	0	0.046663587	0	0
cg12647574	-0.438702367	0	0	0
cg12654412	0	-0.029756948	0	0
cg12685753	0.269264377	0.089947846	0.674657926	0
cg12691488	0	0	0	-11.94013739
cg12708994	-0.086066142	-0.392230752	0	0
cg12816936	-1.264852689	0	-1.126106405	0
cg12838546	1.431315124	0	0.361198499	0
cg12900170	0	0	0	0.81050366
cg12907988	0.286423393	0	0.621131492	0
cg12992268	0	-0.136734656	0	0
cg13031611	0	0.206974972	0	0
cg13046832	0.145457904	0	0.043494656	0
cg13185702	0.228633803	0	0.860300289	0
cg13191008	0.453540234	0.047567719	0.32043905	0
cg13192180	0	0	0	-1.823264701
cg13233461	0	0	0	2.709473847
cg13236659	0.278209798	0	0	0
cg13239348	0.447212244	0	1.756688812	0
cg13254934	0	0	0	-0.611062675
cg13267931	-0.087722268	0	-0.153758142	0
cg13274014	0.991757708	1.517945063	0.553792737	0
cg13307451	-0.378001642	0	-2.116265755	0
cg13315047	-0.127593461	-0.070316577	0	0
cg13323902	0	0	0	0.451814324
cg13324057	0	-0.014107093	0	0
cg13342364	2.668498527	2.599521711	2.899637179	0
cg13355704	0	-0.176917095	0	0
cg13399714	0	0.025746247	0	0
cg13427473	0	-0.059085158	0	0
cg13474998	0	0.003857903	0	0
cg13485703	0	0.111026431	0	0
cg13491563	0	0	0	0.118744896
cg13511000	0	0.098282637	0	0
cg13516479	-0.381781218	0	-1.347609567	0
cg13550608	0.029347583	0	0	0
cg13561592	0	-0.63830006	0	0
cg13564459	0	0	0	-0.349392917
cg13612295	-0.344526077	-0.003200949	-0.691816173	0
cg13613346	-0.664253461	-0.315222442	-0.800805052	0
cg13624385	0.158663854	0	-0.003662234	0
cg13631318	0	0	0	-0.762789104
cg13648045	0	0	0	-0.099285082
cg13657446	0.15699031	0	-0.016346234	0
cg13670306	-0.357653821	0	-0.386511255	0
cg13673837	-1.012668158	-1.487813881	-1.484340582	0
cg13677043	-1.300385566	0	0	0
cg13742400	0	0.251704467	0	0
cg13792528	0	0	0	0.11138822
cg13826459	0	0	0	-0.13377686
cg13850887	0	-0.099840744	0	0
cg13862711	0	0.210910923	0	0
cg13875518	0.107064184	0	0	0
cg13896879	0	0.405207308	0	0
cg13901768	0.817191775	0	0	0
cg13925920	0	0	0	2.882649456
cg13930596	0.095973354	0	0.180403573	0
cg13942136	0	0.395578518	0	0
cg13975660	0.069899793	0	0.078319519	0
cg13977280	0	0	0	1.160570986
cg13995774	0	-0.859505757	0	0
cg13998890	0.009672338	0	0.385183553	0
cg14042504	0	0.034748607	0	0
cg14065127	0	-0.692932441	0	0
cg14118398	0	-0.005950914	0	0
cg14163665	0	0	0	0.373544383
cg14185670	0	2.526129789	0	0
cg14185994	0	0	0	0.307875164
cg14188346	0	-0.365835726	0	0
cg14230719	0	0.293882413	0	0
cg14239515	0	0.241573987	0	0
cg14304702	0	-0.925984446	0	0
cg14319286	0.574124208	0.479082107	0.865676159	0
cg14324358	0.240817708	0	0.413700707	0
cg14324675	0	-0.320221834	0	0
cg14326260	-0.306246257	-0.255874914	0	0
cg14377973	0	0.110879204	0	0
cg14381623	0	0.963072519	0	0
cg14415214	0.104355098	0	0.288345366	0
cg14430629	2.714003561	1.923237509	1.584266508	0
cg14436426	0	-0.037977196	0	0
cg14471784	-0.585321668	-0.249895106	-1.252164332	0
cg14477263	0	0	0	-0.760436598
cg14479301	0.313236075	0.615888205	0.34471347	0
cg14507658	0	0	0	0.437510464
cg14519515	-2.082745114	-1.195925013	0	0
cg14542378	0	0	0	0.139124869
cg14542646	0	0	0	-0.620836781
cg14576951	0	16.69583891	0	0
cg14590206	0.893088244	0.292275507	0.224965465	0
cg14602087	0	0.045517597	0	0
cg14609139	0	0	0	-0.042347363
cg14610958	0	0	0	0.17104575
cg14614689	-0.404849901	0	-0.66615355	0
cg14620572	-0.315008604	0	0	0
cg14653043	0.099198453	0	0.099249049	0
cg14654324	-0.098530507	0	-0.543147236	0
cg14656657	0.719654413	0	0.093393134	0
cg14689532	-0.488608015	-0.874319816	-3.364220738	0
cg14730102	0	-0.049894828	0	0
cg14740789	0	0	0	0.34406336
cg14767790	-0.147110592	0	-0.5382554	0
cg14789214	-0.352123162	0	-0.165710707	0
cg14793056	0.212736322	0	0	0
cg14823363	0	0.387231855	0	0
cg14830003	0.149608924	0.36266777	0	0
cg14834938	0.101245039	0.210681765	0.248146762	0
cg14840612	-0.346913267	0	-0.732153405	0
cg14861570	0	-1.307582371	0	0
cg14871932	0.140536432	0	0	0
cg14880894	0	0.270546646	0	0
cg14882966	-0.214433447	0	-0.150571368	0
cg14938844	0.823619565	0.700122502	1.894831093	0
cg14971327	0	0.083579448	0	0
cg15044957	0.157540837	0	0.6969448	0
cg15061231	-0.315371987	0	-0.116438865	0
cg15190914	0	0.147051614	0	0
cg15239679	-0.070222501	-0.342736599	0	0
cg15279476	0	0.095383694	0	0
cg15326535	0.032838604	0	0.352818242	0
cg15339231	0.217448448	0	0.164556773	0
cg15366353	0	-0.322037236	0	0
cg15367453	0	0	0	0.286751393
cg15393304	-0.208796394	0	-0.030665942	0
cg15405432	0.004481472	0	0.123709216	0
cg15429854	0.377079245	0.394258761	0.866038466	0
cg15488978	0.789888473	0	0.077364934	0
cg15490640	0	0.365184422	0	0
cg15506894	0	0.561554083	0	0
cg15556990	0.814049402	0.317953244	0	0
cg15590989	0.006299941	0	0.326193602	0
cg15603311	0	0	0	-0.705446629
cg15701237	-0.121450964	0	-0.44992863	0
cg15745667	0	0	0	-0.596734692
cg15751452	0	-0.174575873	0	0
cg15799226	-0.029384689	0	-0.490931033	0
cg15817705	0	0	0	-4.534047516
cg15862128	-0.071764854	0	-0.671738774	0
cg15873474	-0.170455628	-0.154348837	0	0
cg15881404	0	0.582594603	0	0
cg15899053	0	0.076246119	0	0
cg15909725	-0.176720388	0	-0.350312837	0
cg15914463	0	0.605203164	0	0
cg15936066	0	0	0	-0.261421353
cg15936446	0	0	0	0.27094931
cg15957413	0.222999877	0	0.104801061	0
cg15995704	0	0	0	-0.132355421
cg16047471	0.426853218	1.329228121	0.07263513	0
cg16058975	0	-0.008253351	0	0
cg16072688	0	0	0	-0.640400115
cg16076997	0	0.130191289	0	0
cg16117789	0	0	0	0.237908206
cg16137949	0	0	0	-0.269621383
cg16153883	0	0.156312329	0	0
cg16154071	0.564385156	0.790675034	0	0
cg16201273	-1.723969084	0	-2.968338855	0
cg16207263	0	0	0	-0.957478102
cg16208206	0	0	0	0.420318546
cg16225405	0	-0.154964419	0	0
cg16248277	-0.096226619	0	0	0
cg16248798	0	0	0	0.912479777
cg16269755	0	0	0	-0.505098537
cg16330755	1.714470342	1.061758418	1.253512884	0
cg16369288	0	-0.302380335	0	0
cg16373998	0.274675561	0.19569774	0.908501162	0
cg16383503	0	0	0	-0.048793853
cg16400320	-0.87305809	-0.281159638	0	0
cg16405637	0	0.019271196	0	0
cg16430072	0.360829028	0	0	0
cg16461134	-0.033789248	0	0	0
cg16464007	-0.08457753	0	-0.255449173	0
cg16498194	0	0	0	-0.006555008
cg16553083	1.146026576	0	0	0
cg16555505	0.013963383	0	0	0
cg16567676	0	0.363866684	0	0
cg16592326	0	0.059443198	0	0
cg16594273	0	0.017203236	0	0
cg16602747	0	0.426370175	0	0
cg16606638	-0.270533687	0	-0.351755993	0
cg16621633	0.679507207	0	0.945988853	0
cg16658557	-0.153033411	-0.166559818	-0.476283279	0
cg16673477	0.183073957	0	0.0293185	0
cg16688437	0	0	0	-1.514791938
cg16706631	0	-0.856700673	0	0
cg16743289	0	0	0	5.666565873
cg16744911	1.308310456	0	0.515191169	0
cg16873863	0	0	0	0.879989446
cg16901014	0	0.050334822	0	0
cg16928044	-2.514675855	-4.881968499	-0.047806877	0
cg16970628	0.199939905	0.177633294	0.349966224	0
cg16976370	0.098090871	0	0	0
cg16977520	-0.896512005	-0.033335594	-0.93345059	0
cg16992257	0.570535526	0.447548449	0.80202475	0
cg16992627	-1.319788142	-1.77998463	-2.632023168	0
cg17041937	-0.102062459	0	-0.006757058	0
cg17064250	0.39729646	0.444712581	0.691386143	0
cg17077776	0	0	0	0.261839152
cg17078326	0	0	0	-0.57902654
cg17100943	0	0.074560602	0	0
cg17160984	0.186923256	0.139925951	0.465893023	0
cg17217158	0	-0.164080804	0	0
cg17222755	0	0.656303768	0	0
cg17257265	0.760740347	0	1.688037108	0
cg17279839	-0.070545019	0	-0.441978431	0
cg17292758	0	0	0	0.512723525
cg17293641	-0.006569978	0	0	0
cg17313945	-0.003567016	0	0.03789744	0
cg17328631	0.03645649	0	0.457802342	0
cg17373022	0	0	0	0.795177433
cg17378193	0	-0.114548813	0	0
cg17409809	-0.050830724	0	-0.064328367	0
cg17421890	0.477365167	0	1.487206213	0
cg17428324	0	-0.060983812	0	0
cg17434901	-0.092516195	-0.224082798	-0.491467171	0
cg17452301	-0.810274063	-1.606863617	-0.382729838	0
cg17458967	0.014737562	0	0.368783679	0
cg17483959	-1.266665649	-1.495652098	-0.838682752	0
cg17485141	0.99037652	1.340526717	0.361149973	0
cg17490196	-0.001885307	0	0	0
cg17518965	-0.140278247	0	0	0
cg17525406	0	0	0	-0.060060055
cg17557540	-0.115948207	-0.161175578	-0.521201887	0
cg17631451	0	-1.711604867	0	0
cg17658634	0.206588133	0.032182472	0.284294033	0
cg17766305	0	0	0	-0.079211556
cg17816394	0.261682828	0.050675234	0.473614234	0
cg17819635	0	0.871354584	0	0
cg17842912	0.546726473	0	0.693958105	0
cg17864046	0	-0.070479813	0	0
cg17871910	-0.149994494	0	0	0
cg17959970	0	0.014650445	0	0
cg17982031	0	0.003441059	0	0
cg18007837	0	-0.282270225	0	0
cg18025275	0	-0.476443197	0	0
cg18037834	0	0.393966699	0	0
cg18045556	-0.093015537	0	0	0
cg18050291	0	-0.02908189	0	0
cg18054674	0	-0.005768678	0	0
cg18087256	-0.663440945	0	-2.581516063	0
cg18098498	-0.068023428	0	-0.719424125	0
cg18109838	-0.096534724	0	-0.529629601	0
cg18147676	-0.034083337	0	-0.167884999	0
cg18236863	0	0.450383065	0	0
cg18237551	0	0	0	-0.988530435
cg18259003	-0.102161272	0	-0.065064233	0
cg18299578	0	0.139274211	0	0
cg18318704	-0.101767719	0	-0.077791967	0
cg18332814	-0.098636185	0	0.139027252	0
cg18351406	0	0.216449342	0	0
cg18372930	0.742323183	1.579443708	0.759459509	0
cg18405260	3.40306113	2.89342942	1.723605559	0
cg18414021	0.338306098	1.175230253	1.181458832	0
cg18417901	0	0	0	1.164199715
cg18474081	0	0.066036575	0	0
cg18505401	0	0.014569419	0	0
cg18552380	0	0	0	-0.140077405
cg18554789	-1.646410873	0	-3.831446959	0
cg18568460	0	0	0	-0.049011
cg18610079	0.057229406	0.118396413	0.047310679	0
cg18617005	0	0.414368332	0	0
cg18633684	0.115957679	0	0.209722249	0
cg18652346	-0.014435404	-0.042606877	-0.330639167	0
cg18667659	0.110189104	0	0.133534024	0
cg18685034	0	0.068452048	0	0
cg18736431	0	0.007878207	0	0
cg18744482	0	-0.062055036	0	0
cg18752527	-0.211894404	0	-0.293413564	0
cg18756545	-0.194497494	0	-0.006106084	0
cg18771300	0	0.268615417	0	0
cg18781988	0	0.205708656	0	0
cg18835656	0	0.087759113	0	0
cg18836661	0	0.064262658	0	0
cg18840956	0	0.122220116	0	0
cg18945794	-0.690857707	0	0	0
cg18946117	-0.087960178	0	0.888247098	0
cg18977727	1.095608479	0	1.473563743	0
cg19045531	0	0.120730093	0	0
cg19081885	0	0	0	0.067220558
cg19092396	-0.246453994	-0.11906429	0	0
cg19102771	0	-0.041430481	0	0
cg19107655	0.122924806	0	0.608412581	0
cg19222784	0.18035614	0.028061808	0	0
cg19291926	0	0.789120336	0	0
cg19306958	0	-0.011778062	0	0
cg19338222	0	0	0	0.11642999
cg19384241	-0.002477723	0	0	0
cg19416417	0	0	0	-0.499125225
cg19470841	0.056720988	0	0	0
cg19497523	0	0.337459454	0	0
cg19556343	0.286483322	0	0	0
cg19593660	0	0	0	-0.448311764
cg19611392	0	0.016195503	0	0
cg19671395	0	0.043875797	0	0
cg19680696	-0.011266567	0	-0.310420918	0
cg19684887	0.827159878	0	1.406487102	0
cg19708065	-0.136701165	-0.49905473	-0.771958516	0
cg19764066	-0.352053696	0	0	0
cg19786602	-0.059953969	0	0	0
cg19831962	0	0.142120918	0	0
cg19848629	0.104101246	0	0.159087884	0
cg19850463	0	0.131768067	0	0
cg19864002	-0.120256864	0	-0.267994421	0
cg19867914	0	0.148070641	0	0
cg19904031	0.076712812	0.481495732	0.919642326	0
cg19912436	-3.695553609	0	0	0
cg19938119	0	0	0	0.616649941
cg19998151	-0.262850211	0	-0.222637176	0
cg20004451	2.422062872	1.258552001	1.706930934	0
cg20012915	0	-0.140187389	0	0
cg20023783	0	0	0	-0.099400549
cg20083730	0.035509478	0	0.179154169	0
cg20100049	0	0	0	-0.124600739
cg20102034	-0.25709236	0	-0.591955891	0
cg20181887	-0.00424142	0	0	0
cg20188212	0	0	0	-0.212942783
cg20246707	0	0.536434256	0	0
cg20256494	-0.944778837	0	-0.0867531	0
cg20323509	0	0	0	0.479856618
cg20327163	1.085990729	0	0	0
cg20397237	0	0.241361684	0	0
cg20414098	-1.259156228	0	0	0
cg20428033	0	0.038274651	0	0
cg20435464	0.492709737	0.308369681	1.734239444	0
cg20445053	-0.079273439	0	-1.088363699	0
cg20451455	0	0	0	-1.190514563
cg20477448	-0.21218682	0	-0.687604818	0
cg20499457	0	0	0	3.415567736
cg20510474	0	0.021887511	0	0
cg20538986	0.610238576	0	0	0
cg20597382	0.039735367	0	0	0
cg20618622	-0.036422257	0	-0.472884496	0
cg20696478	0	0	0	-1.502217313
cg20758219	0.064018214	0	1.011041331	0
cg20780880	0	0	0	-1.55844823
cg20862496	0	0	0	0.250945484
cg20916427	-0.048188501	-0.018586936	-1.141126704	0
cg20949644	0	0	0	-1.219593848
cg20987610	0	0.273269449	0	0
cg21034183	0	0.224155698	0	0
cg21057613	0	-1.65614629	0	0
cg21073350	0	0.013843528	0	0
cg21109167	0	0	0	0.246766686
cg21113900	0	0	0	0.339129164
cg21135948	0	3.647700885	0	0
cg21148531	0	0	0	0.968952394
cg21148594	0	0	0	-3.054474578
cg21182526	0	0	0	0.273557456
cg21190228	0	0.365728708	0	0
cg21199406	-0.015591568	-0.116249703	-0.038202134	0
cg21200129	0	0	0	0.324085603
cg21216471	0	0.098047748	0	0
cg21218820	0	0	0	-0.092396385
cg21222743	-1.900438966	-0.475941203	-0.524151992	0
cg21252483	0.399266441	0.434103962	0.532227686	0
cg21254135	0.348656554	0	0	0
cg21270593	0	0	0	-0.311224484
cg21276549	-0.705922656	-0.632343141	-0.35804131	0
cg21336456	-0.178526266	0	0	0
cg21433768	-0.269403364	0	-0.082973751	0
cg21467614	-1.167550815	-1.346896031	-0.69093996	0
cg21523908	0.031335269	0	0	0
cg21698802	0	0.181550515	0	0
cg21719937	0	0.021223416	0	0
cg21755212	0	-0.647632575	0	0
cg21817737	0	0	0	0.684050731
cg21818891	0	-1.047899475	0	0
cg21824620	0.011056425	0.396837032	1.121807943	0
cg21827203	-0.402680675	0	-0.299161929	0
cg21843412	0	-0.208129358	0	0
cg21845953	0.173108709	0	0	0
cg21849597	0	0.908556391	0	0
cg21912531	0	-0.109191105	0	0
cg22073332	0	1.008943201	0	0
cg22141993	0	-0.118675932	0	0
cg22168205	-0.430563168	0	-1.342249033	0
cg22193385	-1.017971274	-1.173834038	-1.730518845	0
cg22222461	0.102832618	0.931592153	0.416886809	0
cg22253036	0	2.254907422	0	0
cg22253830	0	0	0	-0.348104113
cg22254606	0.355648967	0	1.091482053	0
cg22354618	0	-0.064094492	0	0
cg22360016	-0.469365644	0	-0.615022042	0
cg22390337	-0.388880371	0	-0.216591669	0
cg22392325	0	0	0	0.156921502
cg22393213	0.555591464	0	0.678185047	0
cg22448889	-0.003096465	-0.017014786	-0.449465012	0
cg22455450	0	0	0	0.163252236
cg22460123	-0.355710853	-1.281193225	-0.278768351	0
cg22491440	0	0	0	-0.623997421
cg22539014	-0.345864165	0	-1.499545356	0
cg22556768	0	-0.360647248	0	0
cg22559494	-0.007079411	0	-0.025436226	0
cg22569523	1.297137615	0.701193798	0.905956397	0
cg22626506	0	-0.152156813	0	0
cg22692158	0	0.022485224	0	0
cg22755932	0.084883334	0	0	0
cg22770135	0	0	0	-0.239033227
cg22782986	0.05836623	0	0.320739647	0
cg22792177	0	-0.001739458	0	0
cg22792461	0	0	0	1.139637958
cg22797134	0.070469037	0.101332407	0	0
cg22816913	0	-0.058107212	0	0
cg22828602	0.658564777	0	1.102744329	0
cg22872195	0	0.278683459	0	0
cg22877281	0	-0.660565463	0	0
cg22878550	0	0	0	0.607975773
cg22946648	-0.037142847	0	0.517239752	0
cg22947322	-1.763586139	-1.316700329	-2.814984689	0
cg22955525	-0.168917669	-0.278381791	-0.198992008	0
cg22960133	0	0	0	-0.865170729
cg22977072	0.214862696	0.220430451	0.316705563	0
cg22995692	0	-0.10047123	0	0
cg23023126	-0.846061093	-0.662309482	-0.304702032	0
cg23031135	-0.002649076	-0.114469562	-0.956639152	0
cg23044186	-1.372031722	-1.392286236	-1.447659262	0
cg23093664	-0.280343114	0	-0.329605673	0
cg23146998	-0.12742465	0	-0.403754388	0
cg23166656	-0.01149773	0	-0.080206272	0
cg23171871	-0.196100554	0	0	0
cg23211736	-0.277082034	-0.822505984	0	0
cg23238147	0.072736812	0	2.985543099	0
cg23330450	0.439441628	0.094008836	0.494389374	0
cg23344780	0	-0.035666617	0	0
cg23349517	0	0.079027595	0	0
cg23442621	-0.004854573	0	-0.615826826	0
cg23466749	-0.339057897	-0.079707338	0	0
cg23594928	-0.115248866	0	-1.067237251	0
cg23697780	-0.034196588	0	0	0
cg23698950	-0.072460023	-0.044278269	0	0
cg23722096	0	-0.182197809	0	0
cg23811464	0.46897241	0	2.404435225	0
cg23831630	0	-0.038445641	0	0
cg23845310	0	-0.289760386	0	0
cg23896056	0.012034824	0	0	0
cg23904595	0	0	0	0.438507412
cg23916679	0	-0.067335279	0	0
cg23932798	-0.050834646	0	-0.75539104	0
cg23951114	-0.115306237	-0.025469238	0	0
cg23969554	0.097058973	0	0.19505126	0
cg24036523	0.002652606	0	0	0
cg24067075	0	-0.2928258	0	0
cg24069479	0	1.15645681	0	0
cg24082440	0	0	0	0.222516126
cg24089600	0	0	0	-3.406891881
cg24117315	0	0	0	-0.564615019
cg24147793	0	0	0	0.308024242
cg24237081	0	0	0	0.869560765
cg24238265	-0.268658295	0	-0.335703559	0
cg24244478	0.609428259	0	0	0
cg24305861	-0.169678001	0	-0.683085402	0
cg24317406	0	0	0	0.302694166
cg24326130	-0.201499447	-0.276549623	-0.286508396	0
cg24336808	0	-0.062180139	0	0
cg24357849	-0.361083183	-0.69131824	-0.282684297	0
cg24364827	0	0	0	1.240216164
cg24474409	0.060560386	0.622222118	0	0
cg24492202	0	0	0	-0.592248223
cg24498636	-0.378671374	-0.182680527	-0.491557646	0
cg24503003	0.275797228	0	0	0
cg24545421	-0.378328266	0	-0.799150249	0
cg24630195	0.12636497	0	0.129857808	0
cg24670552	0	0.119749815	0	0
cg24689177	0	0	0	0.391434175
cg24696967	0	0.295300416	0	0
cg24744557	0	-0.100380284	0	0
cg24771017	1.227927377	0.412928675	1.026222907	0
cg24773770	0.304115292	0.328591727	0.279274167	0
cg24832985	-0.303762936	-0.348621274	-0.847369323	0
cg24837710	-0.213610174	0	0	0
cg24846594	-0.457224993	0	-0.517523917	0
cg24865623	-0.320718428	-2.433314899	-0.269896627	0
cg24903703	0	9.83577191	0	0
cg24909466	0	0	0	-4.978827797
cg24964130	0	0	0	0.055573676
cg24998879	2.958563541	2.128633366	1.517424908	0
cg25023198	-0.056294408	0	-0.635449826	0
cg25076980	-0.847848157	0	-1.366120836	0
cg25147622	0	0.0324135	0	0
cg25165880	-0.044277643	0	0	0
cg25252585	3.431198292	3.029586988	1.120090771	0
cg25298189	-3.458037845	-2.101541381	-1.541730715	0
cg25310824	0	0.170543954	0	0
cg25311466	0.148978617	0	1.604879629	0
cg25377220	0.014671995	0	0	0
cg25396728	-0.007786703	0	0	0
cg25402228	0.329689299	0	0.310904479	0
cg25406408	0	0	0	-1.529200938
cg25413188	-0.007143393	0	0	0
cg25421566	-0.269052704	0	-0.488048942	0
cg25437304	0	-0.07680419	0	0
cg25486824	0	0.120551999	0	0
cg25500028	-0.002396934	0	-0.315966299	0
cg25567337	0	0	0	-0.649412079
cg25587431	-0.260728636	0	-0.098028834	0
cg25616869	-0.629793953	-0.552781467	-0.001935351	0
cg25631489	-0.404559665	-1.374483231	-1.363218856	0
cg25681379	0	0.051321754	0	0
cg25696000	0	0.028987635	0	0
cg25722880	0	-0.052800957	0	0
cg25784308	-0.483861658	0	0	0
cg25813942	0	0	0	1.028243147
cg25854527	0	-0.001387445	0	0
cg25900995	-0.010165868	0	0	0
cg25913882	0.020198944	0	0	0
cg25927778	0	0.015153546	0	0
cg25996290	0	-0.002283725	0	0
cg26031875	0.09208827	0.53658341	0	0
cg26057780	0	-2.444008707	0	0
cg26063563	0.074280043	0	0	0
cg26069719	0.257799312	0	0	0
cg26104073	0	0	0	0.426748638
cg26104551	0	0	0	1.766662142
cg26110645	1.455212764	0.770790419	1.365895874	0
cg26122374	0	0.238261221	0	0
cg26137267	-0.143289107	0	-0.096756159	0
cg26137417	-0.036912922	0	0	0
cg26140475	-0.293337522	0	-0.858294681	0
cg26159990	0	1.193775508	0	0
cg26224785	0	-0.35670726	0	0
cg26233866	1.089462893	0	0	0
cg26249834	-0.301398436	-0.394100149	0	0
cg26250093	0	0	0	0.447444455
cg26336701	0.045767374	0.351450461	0	0
cg26351229	0.085955269	0	0.253148097	0
cg26378179	0	0.040280301	0	0
cg26389380	0	0	0	0.479369449
cg26404422	0	-0.169575222	0	0
cg26427534	0	-0.217088965	0	0
cg26502666	0.018737324	0.224324228	0.344429945	0
cg26520396	-0.002840905	0	-0.077609098	0
cg26544594	-0.055055714	0	-1.313421874	0
cg26559315	0.156738474	0	0.198807667	0
cg26580421	0	0.06045705	0	0
cg26608174	0	0	0	0.205909416
cg26682580	0	0.030200208	0	0
cg26704293	-0.304250204	0	-0.192036944	0
cg26725786	0	0	0	0.110976689
cg26732808	0	-0.01445023	0	0
cg26787096	0	-0.53293219	0	0
cg26867978	0	-0.242471443	0	0
cg26890354	0	0	0	-1.256339113
cg26890706	0	0.065573449	0	0
cg26910511	0	0.015086556	0	0
cg26917999	0	0.043628759	0	0
cg26942892	0.145636635	0	0.055865999	0
cg26955755	-1.148133264	-0.624203131	-1.115215347	0
cg26971420	-0.227780941	-0.408279231	0	0
cg26989927	0	-0.995025677	0	0
cg27029018	0	0	0	-0.197517528
cg27080725	0	0	0	-0.098316105
cg27106909	0	-0.259712884	0	0
cg27109568	0	-0.049322485	0	0
cg27128011	0	-0.124454379	0	0
cg27168443	1.599170714	0	0	0
cg27168858	0	0.281009198	0	0
cg27180286	0	0	0	0.395394688
cg27182106	0.762748725	0.239846226	1.047095854	0
cg27193735	0.100837338	0	0.270388392	0
cg27261733	-0.202883666	-0.391305629	-0.243992817	0
cg27271937	0.315859498	0	0.319833721	0
cg27304519	0	0.018617835	0	0
cg27340749	0	-0.858577812	0	0
cg27353308	0.447720014	0.904073381	0	0
cg27403810	0	0.216348257	0	0
cg27424995	-13.24214989	0	-4.060343893	0
cg27428551	0.292868076	0.332985945	0.819815902	0
cg27459981	-0.149607873	0	-0.118471147	0
cg27480444	0	0	0	0.407539035
cg27595997	-0.021914927	0	-0.407857961	0
cg27598340	0	-1.953030856	0	0
cg27609986	0	0	0	1.17986991
cg27612324	-0.001636665	0	-0.267930918	0
cg27645345	0	0.400237598	0	0
cg27645955	0	0.459466953	0	0
