# Supplementary material for: Placental epigenetic clocks: estimating gestational age using placental DNA methylation levels
Source: Aging (Albany NY). 2019 Jun 24;11(12):4238–53. doi: 10.18632/aging.102049 (PMC6628997; doi:10.18632/aging.102049)
Supplement: Supplementary File 2 [file aging-11-102049-s003.csv]

Name	UCSC_RefGene_Name	CHR	Relation_to_UCSC_CpG_Island	UCSC_RefGene_Group	Meta_Z	Meta_p	Control_Z	Control_p	Preeclampsia_Z	Preeclampsia_p
cg23034799	`CADM1;CADM1	11	Island	TSS200;TSS200	-11.3559810834264	6.9258037629326e-30	-10.2521535457694	6.16294602264791e-23	-4.94644712187447	1.65196231936696e-06
cg21155609	`FAM167B	1	N_Shore	1stExon	11.0359262890164	2.56395782598751e-28	10.2019763647416	9.63116256974102e-23	4.38858553479393	1.90504333886186e-05
cg27339550	`ZNF853	7	Island	TSS1500	-10.9477390819499	6.81268629616931e-28	-9.22936751691803	4.10817792959446e-19	-5.91295049213367	1.46794006513352e-08
cg20025003	`TFCP2L1	2	Island	TSS200	-10.7784908330574	4.34963290879345e-27	-9.45683247308984	6.04061949650802e-20	-5.17503920674367	5.70528792277299e-07
cg02215898	`	6	Island		-10.5993974606146	2.99906193701362e-26	-10.1162082723252	2.05831992724475e-22	-3.65808001150615	0.000333723863237434
cg11544721	`CETN3	5	Island	Body	-10.5497176142657	5.09499919101024e-26	-10.0480500646455	3.75139570171909e-22	-3.67728771404355	0.000311110632707613
cg01152986	`SETD6;SETD6	16	Island	TSS200;TSS200	-10.5437001750029	5.43187519254855e-26	-9.71930652343648	6.50828470834176e-21	-4.24128507495644	3.50255842664339e-05
cg08757742	`RASGRF2	5	Island	TSS200	-10.542450885355	5.50453457439159e-26	-9.1854197084368	5.76497705157684e-19	-5.17442717680534	5.72181458528812e-07
cg26662656	`	15	N_Shelf		10.4651963002767	1.24817556314544e-25	8.19752903116384	1.43733380013809e-15	6.73185582205683	1.73504593961137e-10
cg03418552	`CADM1;CADM1	11	Island	TSS200;TSS200	-10.0955416379213	5.7811038611551e-24	-9.42647791757827	7.8903305591095e-20	-3.85289210922949	0.000161684917211479
cg13458335	`BMP8B	1	Island	TSS1500	-10.0950673394947	5.80911905223567e-24	-9.00726129860652	2.46695365952731e-18	-4.58393781557475	8.29391758664506e-06
cg20630277	`MRPL23	11	Island	Body	-10.0182814588541	1.26686553067326e-23	-9.0227697892067	2.17557974968247e-18	-4.40182155289196	1.80221898088687e-05
cg21908248	`PPP1R15B	1	Island	1stExon	-10.0181344848171	1.26875051793863e-23	-8.95234261302516	3.84489944900406e-18	-4.52495208061846	1.06915732579317e-05
cg26940573	`ZNF566;ZNF566;ZNF566;ZNF566;ZNF566;ZNF566;ZNF566	19	Island	1stExon;5'UTR;TSS200;5'UTR;5'UTR;1stExon;1stExon	-10.0152826185104	1.3058813608093e-23	-8.84422054283898	9.15539552282244e-18	-4.7086868908523	4.8088748558969e-06
cg13242525	`FAM86C;FAM86C;FAM86C	11	Island	TSS1500;TSS1500;TSS1500	-10.0090448409555	1.39088885001965e-23	-8.16470828870003	1.79686833096954e-15	-5.88270027715555	1.71682232949789e-08
cg13512138	`CHID1;CHID1;CHID1;CHID1;CHID1	11	Island	5'UTR;5'UTR;5'UTR;5'UTR;5'UTR	-9.98225879944592	1.822693913965e-23	-8.79113081569644	1.39766023567012e-17	-4.73509450796901	4.27890364008795e-06
cg05569874	`SEMA4B;SEMA4B;SEMA4B	15	Island	5'UTR;1stExon;5'UTR	-9.97809180796237	1.90087141429846e-23	-9.31366715197854	1.99771363714955e-19	-3.81091582450616	0.000189469125755818
cg21060796	`LAYN	11	Island	Body	-9.97745404845535	1.91312596235613e-23	-8.54727557801404	9.6815020767462e-17	-5.15183888009065	6.36535456910807e-07
cg01103597	`RUNX3;RUNX3	1		Body;Body	9.94976028777218	2.52791388387517e-23	8.51891085988945	1.18578603984332e-16	5.14659857785143	6.52439848388837e-07
cg12799981	`ASCC1;ASCC1;C10orf104	10	N_Shore	1stExon;5'UTR;TSS1500	-9.85494519136687	6.52522861496518e-23	-9.37831912215333	1.16597330449168e-19	-3.44912751881012	0.000702940782284543
cg12888127	`KNTC1;RSRC2;RSRC2;RSRC2	12	Island	TSS1500;TSS200;TSS200;TSS200	-9.85249708947802	6.68617843044139e-23	-9.22670449437527	4.10351948672653e-19	-3.70989988149277	0.000275991853789029
cg03366925	`GLI3	7	Island	TSS1500	-9.7981422975989	1.14675203119473e-22	-8.50178742371169	1.35412788336562e-16	-4.87067677731307	2.33183563465568e-06
cg19599862	`ZNF226;ZNF226;ZNF226;ZNF226;ZNF226;ZNF226	19		1stExon;5'UTR;5'UTR;5'UTR;5'UTR;5'UTR	-9.77208426119742	1.48367863568439e-22	-8.19811162538253	1.37718430206724e-15	-5.35030420783783	2.46714316593032e-07
cg16449659	`TIGD4;ARFIP1;ARFIP1;ARFIP1	4	S_Shore	TSS1500;5'UTR;5'UTR;5'UTR	-9.7203390473205	2.46957810925845e-22	-9.08463964404119	1.31552189801121e-18	-3.69220990932083	0.000294548432709876
cg27006129	`ZNF114	19	N_Shore	TSS1500	-9.70664061926078	2.82494444117499e-22	-7.89695603575013	1.28615308683018e-14	-5.74604343533517	3.45966647382573e-08
cg05357662	`PANX1	11	Island	TSS200	-9.69415672296667	3.19264080076594e-22	-8.66390337778201	3.82135556694017e-17	-4.37674077951503	2.00181101335026e-05
cg01003015	`VIM	10	Island	5'UTR	-9.65367268891222	4.74260885194578e-22	-8.06197774306987	3.95248102072403e-15	-5.34359031733795	2.54858837621867e-07
cg07733441	`LOC729338;BBS12;BBS12	4	Island	TSS1500;1stExon;5'UTR	-9.64599073779125	5.11151958860739e-22	-8.88372025300757	6.67470485320115e-18	-3.89431262728432	0.000138085257517404
cg01530988	`MRI1;MRI1	19	Island	TSS200;TSS200	-9.64539456594669	5.14130927875393e-22	-8.62042316714211	5.37490217633224e-17	-4.35455077243259	2.19592649130826e-05
cg09762563	`FDX1	11	Island	TSS200	-9.62700282477865	6.14970305744776e-22	-8.29437866073224	6.64931368911562e-16	-4.88884934643905	2.14757557979214e-06
cg00471645	`	2			-9.6126910379938	7.06772177288115e-22	-8.8790901230546	6.92698266181952e-18	-3.83523575176114	0.000172865372494764
cg15579093	`NEDD1;NEDD1;NEDD1;NEDD1	12	Island	5'UTR;5'UTR;TSS200;5'UTR	-9.60818335255972	7.38402151435987e-22	-8.21932346955477	1.17372395086103e-15	-4.98241373956103	1.40072817793951e-06
cg14753740	`CDC20B;CDC20B;MIR449C;CDC20B;CDC20B;CDC20B;CDC20B	5	Island	1stExon;1stExon;TSS1500;5'UTR;1stExon;5'UTR;5'UTR	-9.58753468269102	9.02148052224515e-22	-9.53457013992646	3.13724556676861e-20	-2.63571485282969	0.00920710874720177
cg18732855	`RPTOR;RPTOR	17	N_Shore	3'UTR;3'UTR	9.58369616304716	9.36327573135805e-22	7.33915501740008	6.74745751476835e-13	6.47554250896085	7.24288750408665e-10
cg11815914	`TNFRSF11A	18	Island	TSS200	-9.55589319575726	1.2252241956611e-21	-8.22516847295408	1.12307943697795e-15	-4.86666014906682	2.3745778293274e-06
cg00256745	`SAC3D1;SAC3D1	11	Island	1stExon;5'UTR	-9.54646610700234	1.34195852145291e-21	-8.66060978136611	3.92157161776986e-17	-4.08450607464393	6.58204626122961e-05
cg05264454	`PDE5A;PDE5A;PDE5A;PDE5A	4	Island	TSS1500;1stExon;5'UTR;TSS1500	-9.54143884460449	1.4086416260162e-21	-8.51928126670826	1.18238306887064e-16	-4.32204734471721	2.51314033714102e-05
cg15388895	`ALDH16A1;ALDH16A1;PIH1D1	19	Island	TSS1500;TSS1500;TSS200	-9.50058618271794	2.08712082901565e-21	-8.78607572115196	1.45496020294947e-17	-3.7720453390827	0.000219177489712554
cg10541887	`	4			-9.49828798967148	2.13369219758805e-21	-9.26363851705161	3.02448556567074e-19	-2.93045581681975	0.003853283618014
cg11018165	`	1			-9.4792826792716	2.56037039979223e-21	-8.99706924493087	2.67914051259145e-18	-3.35928307213216	0.000958315566991377
cg24809935	`	6	Island		-9.46264162352145	3.00260020906972e-21	-8.12066877817822	2.46182564611346e-15	-4.86164001895699	2.42906438212841e-06
cg03037761	`FZD4	11	N_Shelf	Body	9.45990766953144	3.08215238505087e-21	7.61206982444997	1.00087152771385e-13	5.74746817744503	3.43468420012989e-08
cg00688236	`KBTBD11	8	Island	TSS1500	-9.4572676745941	3.16094804468991e-21	-8.93916352292312	4.31976525882796e-18	-3.41931229233701	0.000779625487474612
cg26134152	`C10orf119;C10orf119	10	Island	5'UTR;1stExon	-9.40800965782773	5.05620337064451e-21	-8.10592847490901	2.74826238575144e-15	-4.77723793969131	3.54790215292743e-06
cg06417831	`MAD2L1BP;GTPBP2	6	Island	TSS1500;TSS200	-9.40283877280365	5.31104303030368e-21	-8.09371200851493	3.01038791267999e-15	-4.78821419895355	3.37826904241942e-06
cg19715410	`OPRD1	1	Island	1stExon	-9.39242487700269	5.8634523053129e-21	-8.64053712256076	4.59099344737821e-17	-3.80886337143623	0.000190937405213411
cg22938308	`MYADM;MYADM;MYADM;MYADM;MYADM;MYADM	19	Island	5'UTR;5'UTR;5'UTR;5'UTR;1stExon;5'UTR	-9.39055473241759	5.96850726908604e-21	-8.49087442955156	1.47351904384401e-16	-4.06738106207807	7.04388730475069e-05
cg26723570	`WDR27;C6orf120;WDR27	6	Island	1stExon;TSS200;5'UTR	-9.38189743365515	6.47959962107246e-21	-9.0166328376667	2.28656780129236e-18	-3.12849509550594	0.00206357826137006
cg12820122	`C11orf30	11	Island	TSS200	-9.36211648576456	7.81551619226095e-21	-8.68653913494757	3.19786976896283e-17	-3.66708697417892	0.000322933623988971
cg12007192	`IRF2	4	Island	TSS1500	-9.34607669272651	9.09592395113002e-21	-8.66534927529139	3.77816420491887e-17	-3.67185850143949	0.000317351498021809
cg04024692	`C11orf58;C11orf58	11	Island	TSS200;TSS200	-9.3232945576871	1.12782715709994e-20	-8.83204625765989	1.09428861920459e-17	-3.16681510207126	0.00194682133681063
cg15798153	`CDK14	7		1stExon	9.32025167131765	1.16064666772855e-20	8.18166726972293	1.55853572014376e-15	4.46742583249024	1.36636895389203e-05
cg26149223	`MIR548N;PLEKHA3	2	Island	Body;TSS200	-9.31010628899164	1.27704489127453e-20	-7.94070274028954	9.3355237210552e-15	-4.86925688649522	2.34685943713716e-06
cg26245206	`ABTB2	11	Island	Body	-9.30312009036936	1.36383534641218e-20	-8.47003374701571	1.74587512056768e-16	-3.92908156229952	0.00012083618775035
cg22133366	`SHANK2;SHANK2	11		Body;Body	9.2938262867554	1.48839243327012e-20	7.23036554644284	1.42109352211668e-12	6.08130830913915	6.07975482327132e-09
cg06968475	`FANCL;FANCL	2	Island	TSS200;TSS200	-9.27744856472649	1.73585357926445e-20	-7.74258577667947	3.93919283878069e-14	-5.15057056368559	6.40349947428707e-07
cg16776331	`CTDP1;CTDP1	18	S_Shore	Body;Body	9.26963635250715	1.86781636498423e-20	8.25883153893619	8.70722165568252e-16	4.23006117380028	3.66655870162894e-05
cg12513738	`NUP54	4	S_Shore	TSS200	-9.25079906378754	2.2282059341213e-20	-8.45862734271679	1.89049279870543e-16	-3.84189973580195	0.000168562160602101
cg24315860	`SRPK2	7	Island	TSS200	-9.21899607847071	2.99894766709066e-20	-7.98536096275303	6.7675744673382e-15	-4.60707123021346	7.50272563712008e-06
cg21160192	`MGAT1;MGAT1;MGAT1;MGAT1;MGAT1	5	Island	5'UTR;5'UTR;5'UTR;5'UTR;5'UTR	-9.21751893403955	3.0405390582143e-20	-7.8486713808135	1.82880696377396e-14	-4.84372562888903	2.63352571970466e-06
cg03817671	`EFEMP1;EFEMP1;EFEMP1	2	Island	TSS1500;TSS1500;TSS1500	-9.20868622202926	3.30140736566018e-20	-8.49700910508593	1.40517946267981e-16	-3.68965943927526	0.000297318984524913
cg05993386	`C15orf23;C15orf23;C15orf23	15	Island	Body;Body;Body	-9.20491786990373	3.41932612610709e-20	-8.1531073998408	1.93117199396442e-15	-4.28476038672621	2.9311116685808e-05
cg12835256	`PLA2G12A	4	S_Shore	TSS1500	-9.2022124625654	3.50654167588858e-20	-8.23688340451424	1.02798194611754e-15	-4.13247990803883	5.43695941838758e-05
cg23515496	`FAM84B	8	Island	TSS200	-9.19633537853463	3.70365350937225e-20	-7.63786938489311	8.33232977257105e-14	-5.17042277560175	5.83109794123143e-07
cg02059637	`GRB14	2	S_Shore	TSS200	-9.19414015747075	3.7800556895913e-20	-8.29681536548157	6.52732301918083e-16	-4.01115807930476	8.78702353728681e-05
cg03017418	`CDK5;CDK5;SLC4A2	7	Island	TSS1500;TSS1500;TSS1500	-9.19361133314314	3.79869246654779e-20	-8.06712747108599	3.66906684916551e-15	-4.4126303563942	1.72222093864047e-05
cg14074443	`C1orf95	1	N_Shore	TSS1500	-9.17768669983966	4.40451347412074e-20	-7.95508213735277	8.4567753858602e-15	-4.57680601069514	8.55362157145743e-06
cg15120445	`IFRD1;IFRD1	7	Island	TSS200;5'UTR	-9.17401621085995	4.55716491132097e-20	-7.95341753181144	8.50313675886851e-15	-4.57237400623525	8.71893686477761e-06
cg20150017	`ANO1	11	Island	TSS200	-9.17015132154338	4.7235550029865e-20	-8.24022884621382	1.00231567582782e-15	-4.06192458789196	7.19741657943973e-05
cg17807528	`EIF5A2	3	Island	TSS200	-9.15155021834627	5.6122313698768e-20	-8.03909364277552	4.51783535096433e-15	-4.37689102130563	2.00055458363024e-05
cg15291980	`	2			9.12586473555748	7.11658183401778e-20	8.86840526899441	7.93891513732735e-18	2.89120096310512	0.00434480630709341
cg23802518	`ZMIZ1;LOC283050;LOC283050;LOC283050	10	Island	TSS1500;TSS1500;TSS1500;TSS1500	-9.1240761247029	7.23507058850092e-20	-9.04320598376622	1.84304356472679e-18	-2.56169815254809	0.0113323307461043
cg19442647	`ZXDC;ZXDC	3	Island	TSS200;TSS200	-9.10178687155538	8.88576719473055e-20	-8.96949557703159	3.34801465236985e-18	-2.64590449675473	0.00894447336856403
cg16247323	`HACL1;HACL1;BTD	3	Island	1stExon;5'UTR;TSS200	-9.09888951667455	9.12601230899708e-20	-8.75747185226392	1.8257537388016e-17	-3.0116402789897	0.00299430738297049
ch.14.1488981R	`RIN3	14		Body	9.09176420281535	9.74448424487582e-20	8.31052248552033	9.7283978953106e-16	3.75626971138402	0.00026094238709878
cg20208858	`DKKL1;TEAD2	19	N_Shore	TSS1500;TSS200	-9.08213744019064	1.06463221978973e-19	-8.06655466785778	3.68472187834016e-15	-4.18870463923671	4.33652140053773e-05
cg11244813	`PDE4DIP	1	Island	Body	-9.07400929028561	1.14716329015234e-19	-8.33027769865856	5.05956949575233e-16	-3.71011625904547	0.000275771860956893
cg24924210	`SLC35E1	19	Island	TSS200	-9.07369111797484	1.15051940768169e-19	-8.35732235171848	4.11578393849362e-16	-3.66207717381145	0.000328894032292145
cg24555822	`PERP	6	Island	Body	-9.05718633874412	1.33858804649527e-19	-7.34910958168458	6.30004556179268e-13	-5.39571663830656	1.97905696430822e-07
cg05129951	`DEGS2	14	Island	TSS200	-9.04751389658352	1.46260278680317e-19	-8.06950503153982	3.63056009091252e-15	-4.11454253607084	5.84087105758174e-05
cg07494610	`BRP44L	6	Island	Body	-9.0446925182372	1.5008697194242e-19	-7.61269737869912	9.9642454859152e-14	-4.90855630732235	1.96368007654784e-06
cg02822958	`ATP6V1E2	2		TSS1500	9.03607323866421	1.62400892971571e-19	8.39407469324562	3.10629453519984e-16	3.52176235432918	0.000544647389467786
cg26860113	`TRIB3;TRIB3	20	Island	5'UTR;1stExon	-9.03090387689833	1.70259595623791e-19	-8.39056383049236	3.19106169696963e-16	-3.51748468880768	0.000552955468918041
cg11666446	`	19	Island		9.02547279605602	1.7892107131052e-19	8.38639380086488	3.29471672099223e-16	3.51383415461245	0.000560139410904572
cg16688980	`FBXO31;MAP1LC3B	16	Island	Body;TSS1500	-9.0224084587251	1.83998733251667e-19	-8.47907182783683	1.61436542241743e-16	-3.34522820310166	0.0010053456871611
cg04261408	`SDC2	8	Island	Body	-9.02141049538641	1.85682914623793e-19	-7.72227311850681	4.55825309577125e-14	-4.66954147968293	5.71254454559239e-06
cg07813965	`IFRD1;IFRD1	7	Island	TSS200;5'UTR	-8.98692475206521	2.54244581284832e-19	-7.77457441846618	3.12828810554688e-14	-4.50829630159432	1.1481249250071e-05
cg21961831	`ZNF599;ZNF599	19	Island	1stExon;5'UTR	-8.97462715686008	2.84313064415331e-19	-7.80619970443322	2.48895890751555e-14	-4.42805761449425	1.61391960038303e-05
cg22280406	`RPTOR;RPTOR	17		Body;Body	8.97300564601229	2.8853130014618e-19	8.47052954849654	1.73920490189532e-16	3.26328658290534	0.00132520134403673
cg20472500	`SFRS12IP1;SDCCAG10	5	Island	Body;TSS1500	-8.94922291203357	3.57993575050154e-19	-7.50884754660079	2.07357360177268e-13	-4.89792176049432	2.06093667050738e-06
cg14698961	`KLRAQ1;KLRAQ1;KLRAQ1;KLRAQ1	2	Island	TSS200;TSS200;TSS200;TSS200	-8.93590421850798	4.03861723383728e-19	-7.05336711704224	4.80988765263041e-12	-5.65219804316109	5.56118337885372e-08
cg17029156	`DPYSL5	2	Island	TSS1500	-8.93581496247965	4.04187905544122e-19	-7.59274951925569	1.14776809697773e-13	-4.72382516113617	4.49778596545898e-06
cg15661389	`GAS7	17		Body	-8.93308634201623	4.14286100617976e-19	-7.22875455183892	1.43675666240727e-12	-5.3562384862096	2.39726742952903e-07
cg06742044	`RHBDL3	17	Island	Body	-8.93103081553984	4.22057505615153e-19	-7.72896555604854	4.34437842414157e-14	-4.47544651270945	1.3206157126623e-05
cg01219048	`CASP6;CASP6	4	Island	Body;Body	-8.92750137171046	4.35738738121337e-19	-7.59860710427686	1.10112089196776e-13	-4.69678447379134	5.06793991890695e-06
cg00368987	`ZNF264	19	Island	Body	-8.91401108180614	4.92189028492329e-19	-8.21394022447182	1.22235868480156e-15	-3.59116251665281	0.000425197186034615
cg18729862	`	6	Island		-8.9054199828816	5.31843058569247e-19	-8.40971099298435	2.77785002289709e-16	-3.23349251278133	0.00146329892485293
cg12318269	`GDPD5	11	Island	TSS200	-8.90281369117823	5.44485285592795e-19	-7.73681650990193	4.10606127022077e-14	-4.40475143374382	1.78018897306588e-05
cg23218943	`FBXO36;TRIP12	2	Island	TSS1500;TSS200	-8.90153556679842	5.50793059081591e-19	-7.45550674437813	3.01174612768599e-13	-4.89518165665502	2.08674110054009e-06
cg20884043	`	2			-8.89908909771841	5.63068809604302e-19	-7.75239903086044	3.6705771562733e-14	-4.36992689645186	2.0595957414354e-05
cg16403307	`PFKFB3;PFKFB3	10	Island	TSS1500;Body	-8.8909303980066	6.05993302005694e-19	-7.33085189931128	7.14444086605021e-13	-5.09224652351115	8.41866132995806e-07
cg02228815	`	15	Island		8.88898787691669	6.16680563493516e-19	7.28575477315639	9.78494984138666e-13	5.16559667946952	5.96550008842206e-07
cg14169790	`QSOX1;QSOX1	1	Island	Body;Body	-8.88401087430648	6.44919818769199e-19	-7.94867631472587	8.80459633668276e-15	-3.99551679734588	9.34063017951854e-05
cg07103917	`HTATIP2;HTATIP2;HTATIP2;HTATIP2;HTATIP2;HTATIP2	11	Island	Body;5'UTR;1stExon;5'UTR;5'UTR;TSS200	-8.87510464105268	6.9867693236607e-19	-7.77085807618484	3.21331371169855e-14	-4.28918119994684	2.87828218061481e-05
cg15914358	`TCTN3;TCTN3;TCTN3;TCTN3	10	Island	5'UTR;1stExon;1stExon;5'UTR	-8.87111486190044	7.24172112647999e-19	-8.01159268259928	5.53789049158401e-15	-3.85923147767831	0.000157840549902342
cg15229124	`RBP1;RBP1;RBP1	3	S_Shore	TSS1500;TSS1500;TSS1500	-8.85425938982392	8.4241276072978e-19	-7.905971256638	1.20411051009241e-14	-4.0103276165398	8.81561467219005e-05
cg14189988	`	20			-8.85324747838442	8.50088846437585e-19	-8.05549649716434	4.00019900039598e-15	-3.74623546852345	0.000241281400071664
cg24157952	`PUSL1;ACAP3	1	Island	TSS1500;Body	-8.84591466316223	9.07816162682378e-19	-7.30581895389079	8.4856137508972e-13	-5.04528622591654	1.04762994656769e-06
cg20110591	`LHB	19	Island	TSS1500	-8.83970404169733	9.59724879341591e-19	-7.34952538277218	6.28200645883592e-13	-4.95615690437967	1.58013868818549e-06
cg17895873	`SMYD5	2	Island	1stExon	-8.82359713000749	1.10840467025964e-18	-8.17373214443998	1.71829963449889e-15	-3.48987489838602	0.000609506160395768
cg10142878	`AK3L1;AK3L1;AK3L1	1	Island	5'UTR;TSS1500;TSS200	-8.81885159715758	1.15639581378941e-18	-8.29461215073988	6.63752742625367e-16	-3.25777027299321	0.0013498192836707
cg12764611	`	6			8.81666853010969	1.17915662119023e-18	7.92662595427817	1.03510049506743e-14	3.89827922894095	0.00013600534196358
cg22996534	`MTUS1;MTUS1	8	Island	TSS1500;TSS1500	-8.8146865700269	1.20020353295967e-18	-7.67792602734241	6.26224220116803e-14	-4.33013892221727	2.43029882716742e-05
cg04360458	`REST	4	Island	TSS200	-8.80047822782117	1.36234346613768e-18	-7.49320737573788	2.31390733437213e-13	-4.62519815849	6.93406336169741e-06
cg14588209	`SERTAD3	19	Island	TSS200	-8.79717801704146	1.40299648816066e-18	-7.87652486098028	1.49304123422109e-14	-3.94675632714313	0.000112872286987497
cg00636145	`IRGC	19	Island	Body	8.79508984426935	1.42933566766827e-18	8.39174072699047	3.16239485471968e-16	3.03960172266049	0.00274182925231182
cg17438055	`COX7A2;COX7A2	6		TSS200;TSS200	-8.7912854810821	1.478583252393e-18	-8.0989442543091	2.8952301478279e-15	-3.54506557518488	0.000501407316956891
cg07383210	`TMEM117	12	Island	TSS200	-8.78702825547037	1.53568166734003e-18	-7.95429185244995	8.44866763395504e-15	-3.78998588437761	0.000204956363981738
cg23846459	`PRRG4;PRRG4	11	Island	5'UTR;1stExon	-8.77288872505477	1.74140103966434e-18	-7.78500022295491	2.90141727096246e-14	-4.05814735287793	7.30555847255757e-05
cg17168535	`XPO7;XPO7	8	Island	Body;Body	-8.77081183617299	1.77382657830715e-18	-7.46820307105452	2.75626000477614e-13	-4.60915923556676	7.43500243190056e-06
cg05264510	`ZNF331	19	Island	TSS1500	-8.76613285854092	1.84907805459031e-18	-8.58886966185471	6.87896338433117e-17	-2.63569480027106	0.00920763236062539
cg23983436	`TSPAN4;TSPAN4;TSPAN4;TSPAN4;TSPAN4;TSPAN4;POLR2L;TSPAN4;TSPAN4;TSPAN4	11	Island	TSS1500;1stExon;5'UTR;1stExon;5'UTR;5'UTR;TSS1500;TSS1500;5'UTR;5'UTR	-8.76353952645965	1.89213520852542e-18	-7.08763789424857	3.72400762369926e-12	-5.26144451046245	3.78323753753126e-07
cg07285896	`C17orf89;C17orf56	17	Island	TSS200;TSS200	-8.7632165560734	1.8975663463722e-18	-7.34933670883234	6.29018557678749e-13	-4.80215278922307	3.1741154234987e-06
cg06635371	`TMEM179B	11	Island	TSS200	-8.75972480071241	1.95727632569128e-18	-8.00030525801007	6.5672595234616e-15	-3.58434526533717	0.000481129472387401
cg14170545	`ABCA1	9	N_Shore	5'UTR	-8.75792532400274	1.9887684724775e-18	-8.2888894691053	6.93243298270326e-16	-3.14486385255036	0.00195702796226006
cg08648409	`MYCBP	1	Island	TSS200	-8.75419250911787	2.05569952262169e-18	-8.26617569332789	8.7089441126312e-16	-3.02594629508257	0.00303108148501968
cg20977111	`FAM3C;FAM3C	7	Island	TSS200;TSS200	-8.75384505633863	2.0620415073445e-18	-7.7526304773662	3.66446482983925e-14	-4.0764510252399	6.79556634542645e-05
cg04203429	`PRRT2	16	N_Shore	TSS1500	-8.7535374595583	2.06767212864377e-18	-7.93755665947028	9.55358854478096e-15	-3.75173813737893	0.000236399132688016
cg22717608	`PDHX;APIP;PDHX;PDHX	11	Island	TSS200;Body;TSS200;TSS200	-8.7518272868584	2.0992551453949e-18	-7.77927339355282	3.02394965870857e-14	-4.02568659363331	8.30088579094774e-05
cg15551292	`SRP19	5	Island	TSS200	-8.75066863588811	2.12092301457154e-18	-7.74160429105408	3.96710150993255e-14	-4.08936564713226	6.45633940876114e-05
cg26959053	`FAM40B;FAM40B	7	Island	TSS1500;TSS1500	-8.74529725000897	2.22429296275433e-18	-7.62280307986518	9.27436612252047e-14	-4.28673234551538	2.90743274626432e-05
cg00638090	`FBRSL1	12	N_Shore	TSS1500	-8.73856851411498	2.36082709497234e-18	-7.57660496250202	1.28664875514229e-13	-4.35411972135594	2.19987031370125e-05
cg16245339	`DECR2	16	Island	TSS1500	-8.73734778279741	2.38646927922316e-18	-7.24704007860403	1.28090501135858e-12	-4.92647804145002	1.8097390436204e-06
cg18110444	`DARS	2	Island	TSS1500	-8.73397436284342	2.45876868386031e-18	-8.25177956900465	9.18467545767988e-16	-3.16157305138176	0.00185352751088143
cg09708084	`MAPRE3	2		Body	8.73298777038647	2.48031919139883e-18	6.93328989660899	1.03687563692768e-11	5.47030029949696	1.37401370176063e-07
cg19927257	`RUSC1;RUSC1;RUSC1;C1orf104;RUSC1	1	Island	Body;Body;Body;TSS1500;Body	-8.72253744961255	2.72035664108487e-18	-7.88920942200412	1.37000693150239e-14	-3.77520481773495	0.00021660715698269
cg10280223	`AP3B2	15	Island	TSS1500	-8.72236506789571	2.72450253512412e-18	-7.3967091387634	4.53327171446509e-13	-4.63670103744486	6.59498594206188e-06
cg25456310	`	15	Island		-8.70727746220567	3.11260517195706e-18	-7.36982939619963	5.46032661730918e-13	-4.65336566704107	6.13194395653151e-06
cg21729186	`HIST1H4H	6	Island	TSS200	-8.70705182748221	3.1188051425476e-18	-8.49550698101986	1.42161765316775e-16	-2.68010507628072	0.00811151709200048
cg16901519	`PEX26;PEX26	22	Island	TSS200;TSS200	-8.69776102290689	3.38496456169654e-18	-7.88677764310467	1.38541877879695e-14	-3.72818638614777	0.000257972794984184
cg16144317	`PTPN14	1	Island	TSS1500	-8.69650271623615	3.42269475932983e-18	-7.54696393922561	1.58603503141147e-13	-4.32118762504059	2.52209944173388e-05
cg18945299	`HRNBP3	17		5'UTR	-8.69451368091874	3.48318432977649e-18	-7.6019548246241	4.91158314198004e-14	-4.57896047150059	8.47435315710787e-06
cg22653140	`	10			8.69331818773526	3.52004762815753e-18	8.26138096075068	8.54071491668808e-16	3.06271099942906	0.00254811161465032
cg13528015	`CCDC75;HEATR5B	2	Island	TSS1500;5'UTR	-8.67663806329693	4.07639804058478e-18	-7.2522338375274	1.22437666529023e-12	-4.79763415610022	3.23895659182947e-06
cg26694028	`	1	N_Shore		-8.67043723322713	4.30464192815067e-18	-8.3164576197938	5.62138213582615e-16	-2.92001775713922	0.00397875851053026
cg13464717	`OAZ1;OAZ1	19	Island	5'UTR;1stExon	-8.6676011895282	4.41319380054264e-18	-7.65575134276663	7.33599579026959e-14	-4.07221548349627	6.91047220109388e-05
cg03371404	`CAPN10;CAPN10;CAPN10;CAPN10	2	Island	TSS1500;TSS1500;TSS1500;TSS1500	-8.66033816050386	4.70366801384404e-18	-7.37891590033162	5.12777831828458e-13	-4.54272802553345	9.90647109621483e-06
cg18721605	`HDHD2	18	N_Shore	5'UTR	-8.65015238383195	5.14307091512035e-18	-8.04741099567617	4.24759583965246e-15	-3.35060486782426	0.000987105838473534
cg14522793	`CDCA8;C1orf109	1	Island	TSS1500;TSS1500	-8.64441347109739	5.40823804882732e-18	-8.13071091364971	2.28377102092344e-15	-3.1930378136468	0.00167225038113095
cg06733736	`BTBD12	16	Island	TSS200	-8.64223884127225	5.51220465761463e-18	-8.0881363976032	3.13807935080051e-15	-3.26326382564564	0.00132530204138632
cg25951934	`	5	Island		-8.6304014273332	6.11370215311928e-18	-7.17668323262478	2.04544670670781e-12	-4.83674503281222	2.71761874775418e-06
cg03545047	`ZNF767;ZNF767	7	Island	Body;Body	-8.62709421700871	6.29303334667984e-18	-7.67619723212287	6.34006811180535e-14	-3.9546489740453	0.000109479398326279
cg16392585	`NAPB	20	Island	TSS200	-8.62402022322934	6.46436962467859e-18	-7.24974710340223	1.24532088368512e-12	-4.69582115311221	5.08948616076213e-06
cg27599958	`ELOVL5	6	Island	5'UTR	-8.61674430793245	6.88847266314757e-18	-7.68791190685142	5.8307830021279e-14	-3.91323461049125	0.000128427593312412
cg21877903	`NEDD1;NEDD1;NEDD1;NEDD1	12	Island	TSS200;TSS1500;TSS200;TSS200	-8.61438415073684	7.03185461298898e-18	-7.93914066343264	9.44317549491968e-15	-3.4681815896635	0.000657694338482422
cg15466606	`SDK1	7	Island	TSS1500	-8.61156893005413	7.20673857843271e-18	-7.24621566824937	1.27567066984113e-12	-4.67688621980943	5.53137184683569e-06
cg24360998	`	1			-8.6031559134078	7.7553508955745e-18	-8.28994788066797	6.87693169740388e-16	-2.83071860276165	0.00521496175707238
cg02389323	`FAM38A	16	N_Shore	Body	8.59823651548305	8.09503373770738e-18	8.41066058221134	2.73497438116022e-16	2.60923740508292	0.00992226346829725
cg15023427	`	12	Island		-8.59622169675464	8.23835772783397e-18	-7.94015423647408	9.3731856925081e-15	-3.42975745069205	0.000751911739276991
cg08909156	`TRAPPC3	1	S_Shore	TSS1500	-8.58957705960368	8.72900453561556e-18	-6.65580375692832	6.23449814213158e-11	-5.66723740609897	5.15573182930362e-08
cg23587288	`SLC30A3	2	N_Shore	Body	8.57765173310487	9.68296030260321e-18	7.3318248992711	7.09675733187728e-13	4.45841445542429	1.41958978946713e-05
cg08113093	`SNIP1	1	Island	1stExon	-8.57499616335944	9.90900994514897e-18	-7.23464143867409	1.38033023128403e-12	-4.62337489747767	6.98932759857128e-06
cg16720650	`STX18	4	Island	TSS200	-8.56506298546558	1.0801678310524e-17	-8.22680611721473	1.10928104796657e-15	-2.86451457068996	0.00471095371223949
cg09210519	`SH3PXD2A	10	Island	Body	-8.56337766112419	1.09608163570849e-17	-7.78472292228257	2.92549607449592e-14	-3.63731096859749	0.000359913922866855
cg18214379	`GDF6	8	N_Shore	Body	-8.55937272383064	1.13483272534576e-17	-7.6109856689785	1.00860018357448e-13	-3.93228849681224	0.000119352666280083
cg05074892	`BRD2;BRD2	6	Island	5'UTR;5'UTR	-8.5559227834546	1.16929552463598e-17	-6.82431049232097	2.11273883511736e-11	-5.30401420558988	3.08454386907144e-07
cg09118550	`RPP38;RPP38;RPP38;RPP38;RPP38;C10orf111;RPP38	10	Island	1stExon;5'UTR;1stExon;5'UTR;1stExon;TSS200;5'UTR	-8.5536353846092	1.19271255786313e-17	-7.62242586432669	9.35337591401702e-14	-3.9014590625523	0.000134359474956841
cg22800045	`MAP3K1	5	Island	TSS200	-8.54895288928674	1.24210199442543e-17	-7.52607364619008	1.84747183869258e-13	-4.06049625563149	7.23812907447861e-05
cg24181266	`DOCK6	19	Island	Body	-8.54508861558931	1.28437682693875e-17	-8.33342826925053	4.93946864721085e-16	-2.63735016065533	0.00916449750418232
cg11838071	`WDR89;WDR89	14	Island	TSS1500;TSS200	-8.53789986231698	1.36683292503881e-17	-7.27145588977592	1.07375601883627e-12	-4.48400365713348	1.27342611695937e-05
cg14470647	`ABCA1	9	Island	5'UTR	-8.52963779657148	1.4680663447438e-17	-8.16851983355863	1.72031871570948e-15	-2.89518397706103	0.00429244343131993
cg18120576	`	10			8.52961284785406	1.46838297147514e-17	8.0103244117357	5.59005354494267e-15	3.17237889031261	0.00178931594820348
cg18238491	`SKA1;SKA1;SKA1;SKA1	18	Island	5'UTR;1stExon;1stExon;5'UTR	-8.52007905746462	1.59444445671218e-17	-7.41532129250058	3.983996460473e-13	-4.19591403564921	4.21187347232501e-05
cg27243389	`ALOX5;ALOX5	10	Island	5'UTR;1stExon	-8.5195931405304	1.60114799016713e-17	-7.53724575905253	1.69838927525963e-13	-3.98125494118895	9.87419228825016e-05
cg04071097	`ZDHHC20	13	Island	TSS200	-8.51891002133961	1.61061910806431e-17	-8.07483934746532	3.46457901946121e-15	-3.0377173644068	0.00275820820996313
cg10594585	`	1	Island		-8.51889560575555	1.61081956761891e-17	-7.63363576067296	8.58707810097393e-14	-3.81091925404156	0.000189466681310367
cg09469691	`PPIF	10	Island	TSS200	-8.50952488660559	1.74647506582213e-17	-7.85716503843102	1.71921527437768e-14	-3.40026517308989	0.000832636389088362
cg09717333	`NAA15	4	N_Shore	TSS1500	-8.50895924861259	1.75501501369476e-17	-7.85207078322904	1.79570231491099e-14	-3.40994386639841	0.000805291982677594
cg00028881	`BAT4;BAT4;CSNK2B	6	Island	5'UTR;1stExon;TSS1500	-8.49690674109695	1.94709746474888e-17	-7.16407014944668	2.50704493876152e-12	-4.59107262405952	8.65497318621319e-06
cg01006077	`RABL5;RABL5;RABL5;RABL5	7	Island	TSS200;TSS200;TSS200;TSS200	-8.49396751151851	1.99700152477882e-17	-7.49094680600825	2.35083989274602e-13	-4.01068929890896	8.803151824581e-05
cg21105928	`GPR176	15		Body	8.48798049744683	2.1025884384e-17	7.01608693966275	6.0002682857934e-12	4.8308240945381	2.79097516525795e-06
cg13468418	`	4	Island		-8.48778885700092	2.10605765168727e-17	-7.1434630297423	2.55965498127296e-12	-4.60720454648489	7.49838391018642e-06
cg21783371	`KLHL29	2	Island	Body	8.48586512987345	2.1411967523177e-17	8.10529146893183	2.76135581360978e-15	2.91767126517282	0.00400747502240678
cg25205988	`CHD1L	1	Island	1stExon	-8.48363836573863	2.18259395271453e-17	-8.11389617749476	2.58957506643137e-15	-2.89809797441025	0.00425450022462055
cg21915377	`C3orf17;C3orf17;C3orf17	3	Island	TSS200;TSS200;TSS200	-8.48026940315192	2.24673104044826e-17	-7.69640755196642	5.48687484881921e-14	-3.62296949694363	0.000379115707441677
cg20001070	`UPP1;UPP1	7	S_Shore	5'UTR;5'UTR	-8.47939109584277	2.26375528096395e-17	-8.65207606339848	4.19348049840074e-17	-1.94634121711516	0.0535646848801063
cg01446350	`	16	S_Shelf		8.47742720395464	2.30228322990729e-17	6.85646904821271	1.71415512122311e-11	5.08926809194086	8.53660069712321e-07
cg19176391	`SSH3	11	N_Shore	TSS200	-8.4721521758375	2.40900137537473e-17	-7.03003699953851	5.46911667256368e-12	-4.77443788763149	3.59247513329942e-06
cg08680146	`SYT13	11	Island	TSS200	-8.46343716542848	2.59610311856848e-17	-7.94352486799438	9.14409469397621e-15	-3.1559205302723	0.0018879596842406
cg07853743	`SRRM2;LOC100128788	16	Island	TSS200;Body	-8.46162581406189	2.63675391598373e-17	-8.06891137897956	3.62073094808265e-15	-2.93251960012871	0.003828907963858
cg16347317	`EYA4;EYA4;EYA4	6	Island	TSS200;TSS200;TSS200	-8.45801303068202	2.71971733460208e-17	-6.81459029103201	2.25891965572729e-11	-5.12132839425804	7.34708517505893e-07
cg05081629	`COX6C	8	S_Shore	TSS200	-8.45298655941511	2.83944374757036e-17	-7.89536966717067	1.30114953561809e-14	-3.21922788297515	0.00153404176855746
cg14125353	`	10	S_Shore		-8.45085315853667	2.89181780058983e-17	-7.37709109991565	5.19292247081361e-13	-4.123231822988	5.64175783741823e-05
cg10532262	`NCEH1;NCEH1;NCEH1;NCEH1	3	Island	5'UTR;Body;Body;5'UTR	-8.4445539886666	3.05208486606439e-17	-7.95256733847471	8.55643490471026e-15	-3.10197109514757	0.00224767104455077
cg10449041	`EML3;EML3;ROM1	11	Island	1stExon;5'UTR;TSS200	-8.44052381873976	3.15918666332056e-17	-6.92273327840887	1.11134166871443e-11	-4.89867392720904	2.0539074386179e-06
cg20040488	`	6	Island		-8.43998454804746	3.17379617961132e-17	-7.46789810086977	2.8389687135783e-13	-3.94519015964135	0.0001135573229599
cg08945452	`CASZ1;CASZ1	1	Island	5'UTR;5'UTR	-8.43801313773369	3.22777355829888e-17	-7.364823752411	5.80192839679755e-13	-4.11977734750146	5.72012843766164e-05
cg01135259	`HCCA2	11	Island	Body	-8.43790624186857	3.2307261202655e-17	-7.06551947320379	4.31751984354661e-12	-4.64315241156591	6.41186633613985e-06
cg27380218	`	15	Island		-8.43745998373369	3.24308098557964e-17	-7.58384418172342	1.22942496223131e-13	-3.73491336268211	0.000251628250229942
cg10584042	`SGMS1	10	Island	TSS200	-8.43388149273781	3.34385328024281e-17	-7.02234285330341	5.75608392307270e-12	-4.71070050990238	4.76632944378836e-06
cg12550412	`	1	Island		-8.43318401885396	3.36385121627043e-17	-7.1541450836353	2.38179721200375e-12	-4.47830327380402	1.30467791302274e-05
cg01807820	`SCNN1A;SCNN1A;SCNN1A	12	Island	Body;Body;Body	-8.42993039434542	3.45870886074545e-17	-7.03543578271536	5.27619811434536e-12	-4.67978206749478	5.46147335281543e-06
cg05347473	`FBXO30	6	Island	TSS1500	-8.42982617644	3.46179049475616e-17	-7.72020864932674	4.62629878474243e-14	-3.47947366413305	0.000632182362688442
cg25970120	`RRAGC	1	S_Shore	TSS1500	-8.42403265418289	3.63742829089983e-17	-7.91872415965419	1.09679915189e-14	-3.1198754300224	0.00212181749497441
cg00495515	`MYNN;MYNN	3	Island	1stExon;5'UTR	-8.4140846640202	3.95974658318895e-17	-7.48674895940594	2.42096909733898e-13	-3.85686036902467	0.00015926820082567
cg06103394	`PAQR4	16	Island	TSS1500	-8.40761561362719	4.18429831961053e-17	-7.17489767354947	2.07029580662473e-12	-4.39034197088471	1.89108152040089e-05
cg20024757	`TRAPPC9;TRAPPC9	8		Body;Body	8.40359679932665	4.33007577222249e-17	7.66116134617594	7.05839313568756e-14	3.53003190245807	0.000528917307992484
cg17095098	`FLVCR1;FLVCR1;LQK1;LQK1	1	Island	5'UTR;1stExon;TSS1500;TSS1500	-8.39937945749113	4.48844203081698e-17	-7.28717049638112	9.64288664241139e-13	-4.17695959341188	4.54716836708709e-05
cg03807314	`MAP3K8	10	Island	TSS200	-8.39320871226083	4.73050742740883e-17	-6.80756682984647	2.35493733551448e-11	-5.00503740338239	1.26210125360917e-06
cg25915131	`SSH3	11	N_Shore	TSS200	-8.38971190370786	4.87334930324347e-17	-7.30045027082429	8.80399570312061e-13	-4.13417915724705	5.400109331299e-05
cg13822158	`MEIS3;MEIS3	19	Island	Body;Body	-8.38856333462792	4.92118924701858e-17	-6.68374923438351	5.21842310811014e-11	-5.21266048538972	4.77369380279013e-07
cg02301651	`RETSAT;ELMOD3;ELMOD3;RETSAT;ELMOD3;ELMOD3	2	Island	5'UTR;TSS200;TSS200;1stExon;TSS200;TSS200	-8.38528374239936	5.06035451108606e-17	-7.54668405819568	1.58916600398284e-13	-3.69370729206467	0.000292933205535952
cg27480427	`	7	S_Shore		8.38216404841273	5.19633413684362e-17	6.50467314821556	1.61418975864082e-10	5.51358779069845	1.10999252807741e-07
cg14678829	`PGCP;PGCP	8	Island	5'UTR;1stExon	-8.37353760057086	5.59138334827835e-17	-6.68394159645534	5.21202538091569e-11	-5.18200476387308	5.52043130241444e-07
cg03978375	`IRF8	16	Island	TSS200	-8.37317593276198	5.60857759251702e-17	-7.29347525347091	9.2352421022078e-13	-4.11303729758702	5.87603739564362e-05
cg21848532	`GNPAT;C1orf131	1	Island	1stExon;TSS1500	-8.36963548151531	5.77967426631263e-17	-7.12245652494509	2.94832762605818e-12	-4.40561218216719	1.77376619458753e-05
cg21866596	`C11orf54;TAF1D	11	Island	TSS200;TSS200	-8.36879604818367	5.82098997470415e-17	-7.77325512972821	3.15821492382922e-14	-3.26336184135629	0.00132486838768318
cg04412234	`C16orf38	16	N_Shore	Body	8.36826021453584	5.84751511534838e-17	8.21889229392885	1.177547970795e-15	2.48127960847741	0.0141292711872177
cg03320005	`PCMTD2;PCMTD2	20	Island	TSS200;TSS200	-8.36118173163994	6.20931104963714e-17	-7.52598177813542	1.83844627269397e-13	-3.68135654553559	0.000306509581363431
cg01623806	`CHPF2	7	Island	TSS200	-8.35200944030792	6.71112966952386e-17	-8.47068051563067	1.7225146156344e-16	-2.00721791429644	0.0465751068589997
cg13537240	`CACNA1C;CACNA1C;CACNA1C;CACNA1C;CACNA1C;CACNA1C;CACNA1C;CACNA1C;CACNA1C;CACNA1C;CACNA1C;CACNA1C;CACNA1C;CACNA1C;CACNA1C;CACNA1C;CACNA1C;CACNA1C;CACNA1C;CACNA1C;CACNA1C;CACNA1C;CACNA1C	12		Body;Body;Body;Body;Body;Body;Body;Body;Body;Body;Body;Body;Body;Body;Body;Body;Body;Body;Body;Body;Body;Body;Body	8.34968488674739	6.84453265771174e-17	8.73984713491361	2.099264900445e-17	1.53079974742708	0.128296951194939
cg10675453	`PRICKLE4;TOMM6	6	Island	Body;TSS1500	-8.34328832556709	7.22527142228173e-17	-6.6291128779205	7.38487538120571e-11	-5.21705846321942	4.67495624203356e-07
cg24675448	`EYA4;EYA4;EYA4	6	Island	5'UTR;5'UTR;5'UTR	-8.33451139731892	7.78188778456831e-17	-7.1930771683049	1.83058017070353e-12	-4.21097342386554	3.96245519290109e-05
cg02529490	`TPCN2	11	N_Shore	TSS200	-8.32242162289604	8.61841104943714e-17	-7.99948341019656	6.05617675941371e-15	-2.77331235658421	0.00618464350686559
cg01663232	`IKZF2	2	Island	TSS1500	-8.32065336849251	8.74797360521858e-17	-7.79751546429528	2.65041873499133e-14	-3.12370316622258	0.00209577028144823
cg04835297	`TRPC1	3	Island	TSS200	-8.32027010599661	8.77630806513256e-17	-7.28536353840451	9.76294688875996e-13	-4.02050125698401	8.47137791710546e-05
cg09296611	`ATP6V1C2;ATP6V1C2	2	Island	TSS200;TSS200	-8.31737035488115	8.99363851839114e-17	-7.32003749562672	7.69610935828267e-13	-3.95388238787396	0.000109804640334338
cg18912120	`POU6F1;POU6F1	12		Body;Body	8.31679136605614	9.03766393241404e-17	7.76406356516102	3.37469406575442e-14	3.17453660003273	0.00177674343785448
cg23909597	`KIAA1530	4	Island	TSS200	-8.31588675545046	9.10687488799858e-17	-6.77611212673496	2.89675299167558e-11	-4.90233053502959	2.02006437105205e-06
cg25745663	`UNG;UNG	12	Island	TSS200;Body	-8.31535246108762	9.14799852038598e-17	-7.25594836186127	1.1937351915248e-12	-4.0621300837013	7.19157720661468e-05
cg26446913	`	19	N_Shelf		8.31422217073358	9.23559925211716e-17	8.23907472672696	1.01109779313592e-15	2.33687211992235	0.0207200572949317
cg13269645	`	6	S_Shore		-8.3138402702314	9.26538419236208e-17	-7.01910273757113	5.88130958684557e-12	-4.47416241885925	1.3278404204655e-05
cg19317012	`RBM15	1	Island	TSS1500	-8.31080399170852	9.50558238274948e-17	-7.31845473095335	7.98127424382395e-13	-3.94567255651302	0.000113345904555723
cg01067326	`ALOX12B	17	S_Shore	Body	-8.30884900085074	9.66347945568524e-17	-7.68379347338978	6.00505844509376e-14	-3.2991879514508	0.00117490442596668
cg08707192	`RLF	1	Island	TSS200	-8.30669178730791	9.84071175880704e-17	-7.34584719216531	6.44336086442043e-13	-3.88710264570683	0.000141943362015149
cg15393619	`SERTAD3	19	Island	TSS200	-8.30580341570009	9.91462690107705e-17	-7.23245866903756	1.40099341351353e-12	-4.08402907029613	6.59451031169775e-05
cg11303127	`DNAJC22	12	Island	TSS1500	-8.3057440582204	9.91958508443092e-17	-7.2367291543042	1.3608474087885e-12	-4.07642506468899	6.79626505028396e-05
cg18262830	`MIR192	11	N_Shelf	TSS200	8.30343729210432	1.01141768297822e-16	7.71140880900372	4.92774808605178e-14	3.23987109057296	0.00143265575935877
cg18334637	`C10orf41;ZNF503	10	Island	Body;TSS200	-8.30294031568203	1.01565905150892e-16	-7.80074518190041	2.58919952193797e-14	-3.08230191680395	0.00239384779003202
cg00992297	`ARAP3	5		TSS200	-8.29956967005816	1.04489179286746e-16	-7.74029460676623	4.00464627072078e-14	-3.18144330668967	0.00173704737972839
cg15884721	`ZNF721;PIGG;PIGG;ZNF721	4	Island	5'UTR;TSS200;TSS200;1stExon	-8.29941242966838	1.04627556730088e-16	-6.73896252800696	3.66519336613997e-11	-4.93600972775538	1.7326904850272e-06
cg02873242	`LARP1;LARP1	5	Island	Body;TSS200	-8.29447477297676	1.09066020234022e-16	-6.67223813546256	5.61561378570992e-11	-5.04298441043911	1.0588791288979e-06
cg00741600	`HOOK3;RNF170;RNF170;RNF170;RNF170;RNF170;RNF170	8	Island	Body;TSS1500;TSS1500;TSS1500;TSS1500;TSS1500;TSS1500	-8.29299737490023	1.10429778963517e-16	-7.52524972317591	1.84793237060231e-13	-3.54505860418224	0.000501419755938353
cg18977839	`	1	Island		-8.29075424382784	1.12532578812764e-16	-6.5472784713027	1.23675785320881e-10	-5.25447516302833	3.91140093894908e-07
cg07096206	`FLJ32065	17	Island	TSS200	-8.29007587968896	1.13176244591708e-16	-6.89624392509613	1.32209261366209e-11	-4.64152726047642	6.45752849002564e-06
cg21656520	`RPE;RPE	2	Island	TSS200;TSS200	-8.28570926077513	1.17407277699397e-16	-7.18901305161939	1.88168086632384e-12	-4.11962410447556	5.72362895807307e-05
cg17933722	`	1	Island		-8.27485090853225	1.28616449658538e-16	-6.69857188414442	4.74732569448792e-11	-4.95723661675655	1.57234132551994e-06
cg07586345	`SGTA	19	Island	5'UTR	8.27364539947453	1.29924188803335e-16	7.85731191457694	1.79920025032894e-14	2.76827485298203	0.00655385430483005
cg03252499	`	11			8.26686382167099	1.37528902780713e-16	9.30885785451096	2.07912134613647e-19	0.366465953021546	0.715065625054333
cg26220528	`SHMT2;SHMT2;SHMT2;SHMT2;SHMT2;SHMT2;SHMT2;SHMT2	12	N_Shore	TSS200;TSS1500;TSS1500;TSS1500;TSS1500;TSS1500;TSS200;TSS200	-8.26617305626983	1.38327712756494e-16	-7.65908214748116	7.38240099833893e-14	-3.26642669375854	0.00131137481998495
cg03532363	`	1			-8.26470396879488	1.40041825569043e-16	-8.31963633841205	6.71645605361794e-16	-2.08755747027505	0.0387767057646242
cg06640776	`THUMPD3;THUMPD3	3	Island	TSS200;TSS200	-8.25618941916452	1.50396880104797e-16	-7.38520430016997	4.90938781321287e-13	-3.71622480516307	0.000269629114167163
cg04189988	`SAAL1	11	N_Shore	Body	-8.2559279057727	1.50726591729654e-16	-7.03099300220182	5.43445742394857e-12	-4.33646984321275	2.36731377134792e-05
cg23006223	`C4orf14;POLR2B	4	Island	TSS200;TSS1500	-8.25217855659624	1.55532803798866e-16	-7.42480721689924	3.74954788353146e-13	-3.63978417505497	0.000356696585837465
cg18045859	`CLDN3;CLDN3	7	Island	5'UTR;1stExon	-8.24707196483183	1.62322672730641e-16	-7.25265217594424	1.22088746558791e-12	-3.93013191970063	0.000120348376890435
cg23899285	`PSMB6	17	Island	TSS200	-8.24681875368166	1.62666849389359e-16	-7.1470201593028	2.49902470714773e-12	-4.1147462982124	5.83612609054075e-05
cg01715680	`BTBD7	14		Body	-8.24600817514207	1.637734716015e-16	-7.25534673659163	6.19676382112028e-13	-4.21418490917472	3.91112314155579e-05
cg19818298	`CHD8	14		TSS200	-8.24534228054766	1.64688118136221e-16	-6.44247071378737	2.3751639069585e-10	-5.34652464458914	2.51267577297343e-07
cg18131530	`ALG12;CRELD2;CRELD2	22	Island	TSS200;TSS200;TSS200	-8.23487952244183	1.79738425829241e-16	-7.38334906355746	4.97284864902565e-13	-3.67647755503264	0.000312034504827043
cg16931499	`DBF4B;DBF4B	17	S_Shore	Body;Body	-8.23395636841604	1.81129684396066e-16	-6.87458397276746	1.52317298268727e-11	-4.56625066945022	8.95240584230238e-06
cg10121294	`CATSPER4	1		TSS1500	8.23255380313085	1.83263792414191e-16	7.52096644171833	1.90440966696808e-13	3.43060354846051	0.000749707640408324
cg12459706	`BRD2;BRD2	6	Island	5'UTR;5'UTR	-8.23120909426036	1.85333136139812e-16	-6.01148118936997	3.16643942766186e-09	-6.07333734103916	6.34122002096765e-09
cg03826601	`M6PR	12	Island	TSS1500	-8.23042666145545	1.86547788658512e-16	-7.0812529317598	3.8865754487643e-12	-4.19693099268989	4.19456858361262e-05
cg20725539	`ZNF121	19	Island	TSS200	-8.23021744983471	1.86873897395006e-16	-7.889584525841	1.35731378479292e-14	-2.77986799080224	0.00606617987648571
cg19822229	`TRAPPC3	1	S_Shore	TSS1500	-8.22396230776585	1.96887993137533e-16	-6.42471107323091	2.65055912228579e-10	-5.33450924635159	2.66292149094394e-07
cg24290251	`	7	Island		-8.22157763892225	2.00843418214239e-16	-6.87833695013594	1.64605257128794e-11	-4.53661643320911	1.0913915224079e-05
cg09904383	`FCHSD1	5	Island	TSS200	-8.22008348125761	2.03361572734414e-16	-7.3390641673788	6.75168144809754e-13	-3.72423388452447	0.000261770742468946
cg21659575	`TAF2;TAF2	8	Island	1stExon;5'UTR	-8.21747763627348	2.07827978148332e-16	-7.05556598079398	4.61404403913461e-12	-4.21582037734146	3.88522686448788e-05
cg12334949	`H1FX;H1FX;C3orf47	3	Island	1stExon;5'UTR;TSS200	-8.21684166187383	2.08932632901506e-16	-7.26553031473493	1.11813191174835e-12	-3.84656430423864	0.00016561064806433
cg03738352	`SLC34A2	4	Island	TSS200	-8.21410584463943	2.13750982590021e-16	-7.30417110550643	8.58211283868093e-13	-3.77332414650853	0.000218133685684134
cg25845323	`ZNF12;ZNF12;ZNF12;ZNF12	7	Island	5'UTR;1stExon;1stExon;5'UTR	-8.20759990232298	2.25653687569891e-16	-7.2320409498046	1.40498228415915e-12	-3.88660824246203	0.000142211632284034
cg04482794	`ITPKB	1	Island	5'UTR	-8.20563882496056	2.29367982912483e-16	-7.34160555015774	6.63449948553093e-13	-3.69063387472638	0.000296257575084972
cg00581103	`CLCN7;CLCN7	16	S_Shore	Body;Body	8.20418717741468	2.32156169279616e-16	7.08003226059514	3.91843961912321e-12	4.14612482194693	5.14770078969878e-05
cg15776653	`HMGN4	6	N_Shore	TSS200	-8.19650098869232	2.47485248235042e-16	-6.76319315875932	3.13636581318859e-11	-4.68589190143165	5.31678010049616e-06
cg26421735	`NADK	1	Island	TSS1500	-8.19319771652849	2.54375796843424e-16	-7.38700702459776	4.84848691152714e-13	-3.58596216218775	0.000433214960633969
cg03650713	`	1			8.19269009028932	2.55451324084512e-16	6.84298709166343	1.87136202887009e-11	4.53835956360336	1.00941062655806e-05
cg24963485	`LOC344595;LOC344595;LOC100302640	3	Island	Body;Body;TSS200	-8.18575007087288	2.70612825667656e-16	-6.95326382122546	9.09142261995914e-12	-4.33109075404397	2.42072774785583e-05
cg08844887	`FGFRL1;FGFRL1;FGFRL1	4	Island	5'UTR;TSS200;5'UTR	-8.18506508435125	2.72156524860642e-16	-7.28386051834044	9.86393168614731e-13	-3.75032163814929	0.000237646927333086
cg03808351	`PHF19	9	Island	Body	-8.18182064507658	2.79586986246014e-16	-8.35976281693352	4.03971282684767e-16	-1.85820340584836	0.0652316399410876
cg13527508	`	17	Island		-8.18149347521431	2.80347282909611e-16	-6.65916631466322	6.10265957855453e-11	-4.83792222761919	2.7032578116329e-06
cg02639123	`ACTR3C;LRRC61;LRRC61	7	S_Shore	TSS200;5'UTR;5'UTR	-8.17876781647579	2.86761050669631e-16	-7.68316722366761	2.67033207509753e-14	-2.80488796224154	0.00563274271421962
cg25086512	`TYSND1;TYSND1	10	Island	TSS200;TSS200	-8.17839097280873	2.87659109339509e-16	-6.66477825977316	5.88868940014875e-11	-4.82182685641545	2.90612007931209e-06
cg09611756	`CYP1A1	15	Island	TSS1500	-8.175371407888	2.94955864989319e-16	-7.24264677245285	1.38912120324756e-12	-3.7965143591247	0.000225449551539165
cg12298905	`PROX1	1	N_Shore	5'UTR	-8.16843518859788	3.12415156999957e-16	-7.0915890721318	3.62677330944278e-12	-4.0537313605068	7.43395044499981e-05
cg08421126	`HAAO	2	Island	TSS200	-8.16684468442297	3.16560029214426e-16	-6.93935499569602	9.96332104461342e-12	-4.31731977932584	2.56278593541311e-05
cg20532972	`TNIK;TNIK;TNIK;TNIK;TNIK;TNIK;TNIK;TNIK;TNIK	3	S_Shore	TSS1500;TSS1500;TSS1500;TSS1500;TSS1500;TSS1500;TSS1500;TSS1500;TSS1500	-8.16186866852369	3.29880771083123e-16	-6.87149388973655	1.55420454027301e-11	-4.42620920778441	1.62654237798761e-05
cg09018483	`NOTCH4	6		Body	8.16060220051442	3.33358360817999e-16	8.15706352936013	1.8747331811659e-15	2.17062975944671	0.0315225162856124
cg27531587	`C20orf160	20	Island	3'UTR	-8.15750492347631	3.42016129992843e-16	-7.49623956619864	1.08098821135807e-13	-3.26654202434498	0.00131086955872641
cg16480966	`PHF21A;PHF21A	11		5'UTR;5'UTR	-8.15680482245164	3.44003610851405e-16	-6.86950986878428	1.57445491701176e-11	-4.41946858420047	1.67338183584549e-05
cg25475591	`TBX10	11		TSS200	8.15238565512206	3.56814273898685e-16	7.24097412124514	1.32206307064635e-12	3.75954232000105	0.000229634710724424
cg13731504	`GPSM1;GPSM1;LOC26102	9		Body;Body;TSS1500	-8.14696810002486	3.73162069466627e-16	-6.85608117252206	1.72530375925494e-11	-4.42226528286166	1.65379301877969e-05
cg16912637	`SREBF1;SREBF1	17		Body;Body	8.14471204593041	3.80185564529831e-16	7.36868298502381	5.50376240489594e-13	3.52024261679464	0.000547585516738646
cg19255554	`KCNQ1;KCNQ1	11	S_Shore	Body;Body	8.14045274817518	3.93802505231436e-16	5.67428385473555	2.1646340723126e-08	6.47547747370545	7.24548162706647e-10
cg13719746	`ANP32B	9	Island	Body	-8.13996750045428	3.9538401429522e-16	-7.20955598538166	1.63700109545793e-12	-3.7895470668644	0.000205293542629354
cg02636497	`NTNG1;NTNG1;NTNG1	1	Island	5'UTR;5'UTR;5'UTR	-8.1371983389105	4.04529720466699e-16	-7.31124490303054	8.47420429107606e-13	-3.57208925162497	0.000502179192420912
cg21196487	`S100A2	1		TSS1500	-8.13303265563064	4.18681783451912e-16	-8.63147867454762	4.92895811895015e-17	-1.28356466881989	0.20185092482845
cg01773760	`SETD6;SETD6	16	Island	TSS200;TSS200	-8.13019815716827	4.28589236397466e-16	-7.21139112927933	1.62442962109689e-12	-3.76723833157335	0.000223143521231607
cg14059288	`HTR2A;HTR2A	13		Body;Body	-8.12377097645517	4.51918159105815e-16	-7.28756356040687	9.61696312621021e-13	-3.62015396462093	0.000382996943162552
cg18497504	`DSCR3	21	Island	TSS200	-8.12197290746992	4.58665731576318e-16	-6.19846497086588	1.04858708633491e-09	-5.52522468271334	1.04790157790957e-07
cg03745386	`ERGIC2	12	Island	TSS200	-8.12115436237291	4.61770260943041e-16	-7.10269285433185	3.46087013890811e-12	-3.94037973005574	0.000115686166520519
cg26068141	`NCOA2	8	Island	5'UTR	-8.11452424137987	4.87691676871411e-16	-6.68503393546539	5.27184947836119e-11	-4.65023005621156	6.21660664850696e-06
cg04829993	`COL13A1;COL13A1;COL13A1;COL13A1;COL13A1;COL13A1;COL13A1;COL13A1;COL13A1;COL13A1;COL13A1;COL13A1;COL13A1;COL13A1;COL13A1;COL13A1;COL13A1;COL13A1;COL13A1;COL13A1	10	Island	TSS200;TSS200;TSS200;TSS200;TSS200;TSS200;TSS200;TSS200;TSS200;TSS200;TSS200;TSS200;TSS200;TSS200;TSS200;TSS200;TSS200;TSS200;TSS200;TSS200	-8.11362997820508	4.91295907617695e-16	-6.07494879484292	2.18855606546705e-09	-5.72089999605816	3.93089049006585e-08
cg11517309	`REEP1;REEP1;REEP1;REEP1	2	S_Shore	TSS200;TSS1500;TSS1500;TSS1500	-8.11158264667371	4.99646588053533e-16	-7.78374018954608	2.92795011570975e-14	-2.7259866828985	0.00710399574052909
cg02562122	`CDK5;SLC4A2;CDK5	7	Island	TSS200;TSS1500;TSS200	-8.10526030106476	5.26327109255702e-16	-7.0537016356092	4.67176826526028e-12	-3.99265804943633	9.44533385264437e-05
cg13549897	`HHLA3;ANKRD13C;HHLA3;HHLA3;HHLA3;ANKRD13C	1	Island	TSS200;5'UTR;TSS200;TSS200;TSS200;1stExon	-8.10366467453541	5.33279615904418e-16	-7.32273312068661	7.55479960394632e-13	-3.51794752492587	0.000552050845934103
cg18454454	`FER	5	Island	5'UTR	-8.09907047165018	5.53806980847067e-16	-7.31643036683336	7.88927672242621e-13	-3.51972332882616	0.000548592866739163
cg17241550	`NDC80;METTL4;METTL4	18	Island	TSS1500;1stExon;5'UTR	-8.09499748289235	5.72655363742721e-16	-6.97446954822612	7.90437525014972e-12	-4.11080808788944	5.92848879632041e-05
cg23748035	`PEBP1	12	Island	Body	-8.09193128183156	5.87260405750598e-16	-6.82921511045599	2.04654406022875e-11	-4.35918671790258	2.15393692697258e-05
cg16182447	`	11			-8.09072628603586	5.93100017280361e-16	-6.36593338936644	3.80394103645769e-10	-5.1686792966275	5.87930951360826e-07
cg16317459	`EBF1	5	Island	TSS1500	-8.08604937720074	6.16312084551753e-16	-6.9640313656385	8.46831297791754e-12	-4.11104622410842	5.92286442458261e-05
cg21914984	`CDC42EP3	2	Island	TSS200	-8.08281493032302	6.32886319933962e-16	-7.5368087002953	1.70362230512667e-13	-3.10069938906551	0.00225686713462256
cg19322477	`LBR;LBR	1	Island	TSS1500;5'UTR	-8.08242434549461	6.34917273140195e-16	-7.32021716956172	7.68661016757348e-13	-3.47949858160851	0.000632127106565304
cg19754707	`	2	Island		-8.08073485531506	6.4377646091111e-16	-7.39798666089739	4.49329834083152e-13	-3.33979470827065	0.00102409718632791
cg25257677	`SLC39A14;SLC39A14;SLC39A14;SLC39A14	8	N_Shore	TSS1500;TSS1500;TSS1500;TSS1500	8.08021327942207	6.4653597527043e-16	8.37725488330208	3.53365781949946e-16	1.62252657956078	0.107087940945206
cg09990919	`CTXN1	19	Island	5'UTR	-8.07711780480059	6.63154756821539e-16	-6.79307135043755	2.58646534560965e-11	-4.3926401243545	1.87296178639071e-05
cg07605211	`SUSD4;SUSD4	1	Island	TSS1500;TSS1500	-8.07698629783418	6.63870026751211e-16	-7.84097071913843	1.93410363115653e-14	-2.55587961014293	0.0115166867532454
cg19182267	`IL17RD	3	Island	Body	8.07227149576171	6.90022284655612e-16	8.68502549123195	3.23622308975635e-17	1.06711870063804	0.288358216000745
cg09107855	`SASS6;SASS6;CCDC76	1	Island	1stExon;5'UTR;TSS1500	-8.06965105218155	7.04993644907662e-16	-7.1095553157283	3.60715059822458e-12	-3.82221950823118	0.000188937752862752
cg15973550	`	16	Island		8.064575837007	7.3490574463685e-16	7.15880179800308	2.70673194315391e-12	3.72408896801906	0.000315537812884131
cg07146104	`	1			-8.06293789691503	7.44823674390833e-16	-7.88022647458979	1.45326698287611e-14	-2.45873541265386	0.0150163653921077
cg22736850	`OVOL2	20	Island	TSS1500	-8.06075798179824	7.58228135272026e-16	-6.66257374885198	5.97185045524801e-11	-4.58833309386484	8.13766204294569e-06
cg10619042	`	17	Island		-8.05840046556271	7.72992254254648e-16	-6.93018092803958	1.05828185762092e-11	-4.1145814110659	5.83996549964148e-05
cg22608128	`FAM183A	1	Island	TSS200	-8.05798888525874	7.75598689943679e-16	-6.53271329618691	1.35938052655406e-10	-4.80843884542065	3.0859938283173e-06
cg05506987	`	3	Island		-8.05746336472301	7.78939270510304e-16	-7.34486257614636	6.4872413236996e-13	-3.38594057386835	0.000874702330927119
cg04735544	`EEFSEC	3	Island	Body	-8.05705441416866	7.81548654195875e-16	-7.08198375639069	3.86762013920365e-12	-3.84582345812006	0.000166076125676821
cg12727528	`TM2D3;TM2D3	15	Island	1stExon;1stExon	-8.05137152075778	8.18713311256428e-16	-6.67910475587711	5.37525137741939e-11	-4.54042189554552	1.0005102483986e-05
cg10861495	`GOLGA8B	15	Island	TSS200	-8.04894022538822	8.35140209962041e-16	-7.05162446783407	4.7577138556009e-12	-3.88291276656325	0.000144232135877925
cg24378392	`FAM115A	7	Island	TSS200	-8.04870028382274	8.36778858086148e-16	-7.21455375098051	1.58237582049651e-12	-3.5966312434753	0.000416916303917174
cg23935113	`C19orf10	19	Island	TSS200	-8.04805835269252	8.41178429178544e-16	-7.04750427042234	5.65993664567353e-12	-3.91927484318858	0.000156399418069108
cg13262159	`	11	Island		8.04763280447629	8.44107541087373e-16	6.54421596359291	1.37865951781853e-10	4.77045139913189	3.97571046463697e-06
cg17755913	`	7			8.04754487397419	8.44714031398868e-16	6.55784147151576	1.16137298683782e-10	4.74346632327758	4.12299078038196e-06
cg11554610	`MYLK2	20	S_Shore	Body	-8.04561818187011	8.58111454146948e-16	-7.02505765139274	5.65318069012885e-12	-3.92251347643894	0.000123929401229643
cg11461308	`CRLS1;CRLS1	20	Island	TSS200;TSS1500	-8.04387660233269	8.7040169197916e-16	-7.11853165786899	3.02712408518815e-12	-3.7551815634571	0.000233391587325598
cg08863539	`ZNF555	19	Island	TSS200	-8.04329228981427	8.74563881541397e-16	-6.94261651083891	9.7517762633972e-12	-4.06230249425978	7.18668146682294e-05
cg15705469	`ZNF71;ZNF71	19	Island	5'UTR;1stExon	-8.04287981454406	8.7751383633607e-16	-6.80040033545117	2.46674206788889e-11	-4.31071104993171	2.63376308005452e-05
cg09444255	`MZF1;MZF1;LOC100131691	19	Island	TSS200;TSS200;Body	-8.04230251069194	8.81659086242411e-16	-7.41963434158977	3.86637549125095e-13	-3.2243081392103	0.00150849116038565
cg07644571	`PPM1F	22	Island	TSS200	-8.03773391764036	9.1515083953684e-16	-7.31180020266892	8.14423295007017e-13	-3.40407436206933	0.000821772681726234
cg24684050	`ZDHHC17	12	Island	TSS200	-8.0348497150912	9.36936728182264e-16	-6.68643789255839	5.12969581995815e-11	-4.4942328748877	1.21914008982004e-05
cg05102849	`SPNS2;SPNS2	17	Island	1stExon;5'UTR	-8.03067317379295	9.69392765136345e-16	-6.89918164719569	1.29691070321309e-11	-4.11296165192116	5.87780999611811e-05
cg10202821	`KANK3	19	N_Shore	Body	8.02801020804497	9.90662395395205e-16	7.3536470117164	6.10592011896195e-13	3.31111548332796	0.00112859039722597
cg15440370	`RPL36;RPL36;RPL36	19	Island	5'UTR;1stExon;5'UTR	-8.02654402019034	1.00256869367343e-15	-7.34566024114619	6.4516700139077e-13	-3.32215424962826	0.00108724746920699
cg07160353	`ZNF346	5	Island	TSS200	-8.02261442947142	1.03517889748115e-15	-7.46087206465911	2.90105503135368e-13	-3.11231082247206	0.00217417506467124
cg12034118	`IRF6	1	Island	TSS200	-8.01842506190329	1.07109596646696e-15	-6.96163373243745	8.60332633180681e-12	-3.9787973298821	9.9690147960724e-05
cg18878886	`KIF17;KIF17	1	Island	Body;Body	8.01815961296613	1.07341267267723e-15	6.45366443365532	2.21619260192419e-10	4.86850288262387	2.35487551868977e-06
cg10747192	`MACROD1	11		Body	8.01803513284174	1.07450077275032e-15	5.78894577131005	1.20031013429002e-08	6.04170931746153	9.0040846996896e-09
cg19888509	`	12	Island		8.0178585332721	1.07604632144261e-15	7.56013964043203	1.75445317374967e-13	2.77317112281062	0.00665121264650789
cg16453007	`TSPAN17;TSPAN17;TSPAN17	5	Island	TSS200;TSS200;TSS200	-8.01749843596956	1.07920457828609e-15	-6.52599847579598	1.41298326834459e-10	-4.74039980907617	4.17945302563266e-06
cg16506378	`	8			-8.01577932327556	1.09440847338987e-15	-7.23239302111771	1.40161955807074e-12	-3.49893985138888	0.000590367230637885
cg07418087	`PABPC1	8	Island	TSS1500	-8.01555861682428	1.09637562953139e-15	-6.87995470307866	1.47067921176691e-11	-4.11615999429851	5.80330673521993e-05
cg22479576	`LOC100130581;LOC100130581	17		Body;Body	-8.01452614052232	1.10562444770883e-15	-7.09259366927119	3.60245173648616e-12	-3.74141644381385	0.000245635206075553
cg26383753	`KCMF1	2	S_Shore	Body	-8.00910998363667	1.15541545784156e-15	-7.40064249060551	4.41130493456248e-13	-3.1906171366858	0.00168559066840209
cg06885750	`NOP58;NOP58	2	Island	1stExon;5'UTR	-8.00581161955126	1.18681288724615e-15	-6.47860632658264	1.89850727819539e-10	-4.79987547800143	3.20663592857143e-06
cg26666090	`SETD6;SETD6	16	Island	TSS200;TSS200	-8.00468830452325	1.19769650871548e-15	-8.32843111514205	5.13129773758979e-16	-1.55569999119816	0.12223808993193
cg16721202	`SP4	7	Island	TSS1500	-8.00406938851599	1.20373503496098e-15	-6.7732035263053	2.94043334919211e-11	-4.28006396630282	2.98825105175027e-05
cg11264102	`ZDHHC17	12	Island	TSS200	-8.00235396531914	1.22062895865408e-15	-7.54603161970279	1.5964883535747e-13	-2.92218339407579	0.00395242243543153
cg08305872	`RPE;RPE	2	Island	TSS200;TSS200	-8.00107042440389	1.23342214794632e-15	-7.58617677700175	1.26040750950957e-13	-2.70409503439974	0.00787936169156233
cg02022572	`IMP3	15	Island	TSS200	-7.99885618650082	1.25580286517835e-15	-7.02381002831964	5.70024490436515e-12	-3.8303446657625	0.000176089743736402
cg08305551	`MAST1	19	Island	Body	-7.9983988934205	1.26047461431704e-15	-7.89397189765787	1.31450591388775e-14	-2.30442049333456	0.0225286992992254
cg20312012	`FER1L5	2		Body	-7.99785874475954	1.26601488093262e-15	-7.26226839134099	5.89704085552493e-13	-3.45137681616585	0.000697451742303225
cg22535228	`PEX10;PEX10	1	Island	TSS200;TSS200	-7.99396859491003	1.30663058113777e-15	-6.36715994583188	3.77547912366588e-10	-4.97129414330791	1.47415988601688e-06
cg06527865	`IRF2BP2;IRF2BP2	1	Island	TSS1500;TSS1500	-7.98908481577813	1.35944146523801e-15	-6.68550597398972	5.16028088616191e-11	-4.40352269515918	1.78939631580589e-05
cg17454083	`RD3;RD3	1	S_Shore	Body;Body	7.98722927766684	1.3800528234303e-15	7.81483740570504	2.33799232195626e-14	2.42056977467255	0.0166311910953238
cg06852392	`MCM9	6	S_Shore	TSS200	-7.98717252852579	1.38068802122501e-15	-6.55464301540613	1.18093659680602e-10	-4.62900789240215	6.81994316896362e-06
cg17644827	`ABTB1;ABTB1;ABTB1;ABTB1;ABTB1;ABTB1	3	Island	1stExon;1stExon;5'UTR;1stExon;5'UTR;5'UTR	-7.98325891436538	1.42519523673543e-15	-7.05760807488803	4.55162034852165e-12	-3.73964009294998	0.000247258712450947
cg03956646	`JRK;JRK	8	Island	5'UTR;5'UTR	-7.97865497467217	1.47936462354507e-15	-7.01342899276317	6.10706878935455e-12	-3.80777637757115	0.000191719372346738
cg22748630	`LOC338799;SETD1B	12	Island	TSS200;TSS1500	-7.97442756476268	1.53088698164362e-15	-6.82516103608179	2.14315777916495e-11	-4.12732944519227	5.55012427782152e-05
cg04780294	`GAA;GAA;GAA;GAA	17	Island	5'UTR;5'UTR;1stExon;5'UTR	-7.97078856565623	1.57665056053414e-15	-6.5796190380418	1.00939600598182e-10	-4.55217698289932	9.51202542772509e-06
cg03568042	`LDB3;LDB3;LDB3	10	Island	Body;Body;Body	-7.96921248343949	1.59688689026708e-15	-6.9277281990249	1.14318160288262e-11	-3.96525282483792	0.000120658949249854
cg13214886	`SETD1B	12	Island	Body	7.96784986599933	1.61458845032407e-15	8.54766896571489	9.48367654035407e-17	1.09714308400886	0.275045524164937
cg27565366	`C1orf38;C1orf38;C1orf38	1	N_Shore	TSS200;TSS200;TSS200	-7.96769228008595	1.616648052165e-15	-6.56693963064892	1.09318459022968e-10	-4.56815065042292	8.8793276341852e-06
cg18990313	`HTRA4	8	Island	TSS200	-7.96542667106176	1.64654651505864e-15	-7.26305841112674	1.13717243260415e-12	-3.34359676747812	0.00101094202286162
cg09506797	`	2			7.96211627755275	1.69121430077555e-15	6.88652838872615	1.40884016878174e-11	3.99680450375476	9.29382849059156e-05
cg12162201	`PRMT2;PRMT2;PRMT2;PRMT2	21	Island	1stExon;5'UTR;1stExon;5'UTR	-7.95809275168455	1.7471137074422e-15	-6.85565496452497	1.72326849218175e-11	-4.04279311502932	7.76129096921018e-05
cg10804730	`BOLA3;BOLA3	2	Island	TSS200;TSS200	-7.9569008226098	1.76401997202354e-15	-7.31778010109125	7.81644423405166e-13	-3.23049104496684	0.00147792770535555
cg23052615	`ZNF347	19	Island	TSS200	-7.95576948465104	1.78021581807968e-15	-7.05579924418995	4.60687119868469e-12	-3.68734258766493	0.000299857050001645
cg21530552	`LOC285205	3	Island	Body	-7.95475459758656	1.79486915350629e-15	-6.73908354499633	3.66234642899074e-11	-4.24035460451882	3.51588295684179e-05
cg25569248	`PTPRN	2	S_Shelf	Body	7.95251797786206	1.82758300546059e-15	8.44374876159948	2.12030453468603e-16	1.24833200229488	0.214459187806802
cg19155471	`	6			7.95142899865744	1.84372279601983e-15	7.93531906773161	9.71173277620126e-15	2.13718271869823	0.0342054452989202
cg13342364	`SEPT9;SEPT9	17		TSS200;Body	7.95137130564995	1.84458177017972e-15	7.10310088088615	1.60107413327027e-12	4.0532633935762	7.44768151000081e-05
cg08301542	`SEC22B	1	Island	1stExon	-7.94785588781921	1.89767223217491e-15	-6.3867268274375	2.21739072197501e-10	-5.77358594354038	3.00673417608189e-08
cg02317785	`WDR5B	3	S_Shore	TSS1500	-7.94419123741862	1.95461846429596e-15	-6.68340506879943	5.22988885178083e-11	-4.31661935431888	2.57022073894595e-05
cg04884618	`MRFAP1L1	4	Island	TSS200	-7.94408419545522	1.95630687673622e-15	-6.68057305110257	5.32517902303782e-11	-4.32136661763282	2.52023164892712e-05
cg24405567	`	15			-7.94397839211745	1.95797716339015e-15	-7.28666158278698	4.95388553326668e-13	-3.22061242354525	0.00152703885924583
cg15007325	`SLC25A28	10	Island	TSS200	-7.94379146455066	1.96093156808855e-15	-6.51147932688251	1.54710134741925e-10	-4.6171210165969	7.18212827441806e-06
cg01548905	`IRAK1BP1	6	Island	Body	-7.94361672528848	1.96369730579485e-15	-6.39635493624271	3.15631289896764e-10	-4.8185295860809	2.94945638700019e-06
cg20035222	`MAP4K1;EIF3K;MAP4K1	19	Island	TSS1500;TSS200;TSS1500	-7.93796558827529	2.05524337036537e-15	-6.32904937777656	4.85245169214166e-10	-4.91145256186169	1.93797164261144e-06
cg14543508	`PHF19	9	Island	Body	-7.93734719461734	2.06551269744197e-15	-8.3205135806366	5.45040079543961e-16	-1.43369644103157	0.154193434915065
cg02394263	`CPPED1;CPPED1	16	Island	TSS200;TSS200	-7.93559728083245	2.09484717938531e-15	-6.50239346242896	1.63729125430716e-10	-4.61651039606857	7.20122519182199e-06
cg11461808	`GPER;GPER;C7orf50;GPER;GPER;C7orf50;C7orf50;GPER	7	Island	1stExon;5'UTR;Body;1stExon;5'UTR;Body;Body;TSS1500	-7.93460671241717	2.11163392097119e-15	-6.32135995680053	5.00825853234075e-10	-4.92946285003105	1.78526188905045e-06
cg00816240	`	2	N_Shore		-7.93368708340798	2.12733703102484e-15	-7.39363960058122	4.63075305487528e-13	-3.05070336735504	0.00264713626468031
cg27297753	`LOC401052	3	Island	TSS200	-7.93343147015708	2.13172213832915e-15	-6.13093720310388	1.56809656340357e-09	-5.26313562731676	3.75275927018287e-07
cg13239297	`SEMA3F	3	Island	TSS200	-7.93221819897995	2.15265780150334e-15	-5.67471851273585	2.15511655826712e-08	-6.06023319957335	6.79518412038689e-09
cg04143294	`MSL2;MSL2	3	Island	TSS1500;TSS200	-7.93158620218924	2.16364333038001e-15	-6.85688296118789	1.70953967185786e-11	-3.98715665470002	9.64997519775443e-05
cg23777444	`FBXO5;FBXO5	6	Island	TSS200;TSS1500	-7.92834830972011	2.2207970446962e-15	-6.51762130043525	1.488909239107e-10	-4.57519604594795	8.61332188029443e-06
cg26265234	`CCKBR	11	N_Shore	TSS1500	-7.92803025692206	2.22649071319931e-15	-7.91502803106282	1.12689076390229e-14	-2.1255302887617	0.0351852261587224
cg00042144	`C1orf74	1	Island	TSS200	-7.92761740469384	2.23390289313492e-15	-6.92819923204103	1.07215226752121e-11	-3.85416323107489	0.000160907031474546
cg09133562	`TMCO4;TMCO4	1	Island	5'UTR;1stExon	-7.92338381525532	2.31132725201303e-15	-7.75185593394482	3.68495941574088e-14	-2.40212192275094	0.0174654287262781
cg25116191	`SCN5A;SCN5A;SCN5A;SCN5A;SCN5A;SCN5A	3	Island	TSS1500;TSS1500;TSS1500;TSS1500;TSS1500;TSS1500	-7.92225472444651	2.33241871681707e-15	-6.524191796119	1.42903035293644e-10	-4.5513854261493	9.54448029987796e-06
cg15750961	`KIAA1598;KIAA1598	10		Body;Body	7.92114286464962	2.35337348949746e-15	5.16554136495995	3.2705459982531e-07	6.93024361675303	5.60626703336528e-11
cg10869957	`	10			7.92094590193449	2.3571048475239e-15	6.99530020173249	7.03780159453834e-12	3.72567644027149	0.000260378517154972
cg02615117	`	20	Island		-7.92022601932847	2.3707922826509e-15	-6.59762008195707	5.66230281083512e-11	-5.09539793648542	8.29559297744995e-07
cg22065614	`GLRB;GLRB;GLRB;GLRB;GLRB	4	Island	1stExon;TSS200;5'UTR;5'UTR;1stExon	-7.91934300415242	2.38768834841355e-15	-7.12472175030535	2.90377165402964e-12	-3.49305195159908	0.000602733175312689
cg23041103	`ZFYVE28	4		Body	7.91901044462182	2.39408240522112e-15	7.97545560519194	7.23030068845433e-15	2.00142801428041	0.0472047940910178
cg22327576	`SLC3A2;SLC3A2;SLC3A2;SLC3A2;SLC3A2;SLC3A2	11	Island	Body;Body;Body;Body;TSS200;Body	-7.9184144299354	2.40558407994425e-15	-7.07949223810749	3.93261803528629e-12	-3.57044523863435	0.000457991704886013
cg25210796	`CACHD1	1		Body	7.91564642254871	2.45971724628992e-15	6.19748665542166	1.05474627926367e-09	5.11061816024893	7.725361681664e-07
cg22665655	`	19	Island		-7.91467384381681	2.47902107116985e-15	-6.45786180990872	2.15930834287204e-10	-4.6523354528939	6.15963682772457e-06
cg12050054	`C14orf80;C14orf80;C14orf80	14	Island	Body;Body;Body	7.91239702682021	2.52479685542227e-15	6.75982790049038	3.20506700726757e-11	4.1185309218225	5.74865980398512e-05
cg22851250	`ACTN3	11	S_Shelf	3'UTR	7.91211494212709	2.53052584938548e-15	7.53499377696905	1.7255232925951e-13	2.75944542889341	0.00644216605710814
cg25691834	`DNAJC30;WBSCR22	7	Island	1stExon;TSS1500	-7.91171773198043	2.53861469140271e-15	-6.60155080435313	8.79076339390756e-11	-4.39454864803189	1.8580407735842e-05
cg21664212	`RRP1	21	N_Shore	TSS1500	-7.91046076145196	2.56437995068845e-15	-6.17102204263903	1.23544724048243e-09	-5.14653518171344	6.52634597623564e-07
cg03293884	`TSPAN14;TSPAN14	10	S_Shore	5'UTR;5'UTR	-7.90978567815668	2.57832385352206e-15	-6.60517328715147	5.38810016839077e-11	-5.04280116151982	1.05977969658388e-06
cg24810741	`SCOC;SCOC;SCOC;SCOC;SCOC;SCOC;SCOC;SCOC	4	Island	Body;Body;Body;1stExon;1stExon;Body;Body;1stExon	-7.90866038060367	2.60173310527077e-15	-7.08276911474284	3.97250275177846e-12	-3.55157057836861	0.000489925311533847
cg03857632	`C5orf37	5	Island	TSS200	-7.90668896971595	2.64324936268137e-15	-7.10302365407329	3.37436278310227e-12	-3.50651543149808	0.00057480652618324
cg02032778	`CPVL;CPVL	7		TSS200;TSS200	-7.90668772887818	2.64327569801419e-15	-6.43964249927956	2.41706446924037e-10	-4.6681514824554	5.74746933765295e-06
cg02352723	`	19	Island		-7.90641775022349	2.64901182784614e-15	-6.23738361653511	8.30130876433845e-10	-5.02207536124981	1.16657046163454e-06
cg02150369	`FST;FST	5	Island	TSS1500;TSS1500	-7.90571873467182	2.66392055086006e-15	-6.36870597157774	3.73990072528993e-10	-4.79051601944475	3.34370244064344e-06
cg11217865	`NRG2;NRG2;NRG2;NRG2	5	N_Shore	3'UTR;3'UTR;3'UTR;3'UTR	-7.90245665083326	2.7345945242003e-15	-6.86877617396565	9.25648572479164e-12	-4.26926739156279	3.12367875824711e-05
cg10574483	`MTERFD3;MTERFD3;MTERFD3;MTERFD3	12	Island	5'UTR;5'UTR;1stExon;1stExon	-7.90217331605835	2.74081949074974e-15	-7.77347875750883	3.15312235013561e-14	-2.32142878004456	0.0215642269570453
cg13252030	`	14	Island		-7.9021422782079	2.74150225085515e-15	-7.24468234319276	1.28907373756038e-12	-3.24810786626263	0.00139396689067395
cg18954051	`TMBIM4	12		Body	7.90177396889946	2.74961699047807e-15	7.09891559750592	3.53282753346922e-12	3.50786544427548	0.000572074219610136
cg01528321	`TSPAN14;TSPAN14	10	Island	5'UTR;5'UTR	-7.90059342307952	2.77578698746395e-15	-6.75537007693828	3.29834977001577e-11	-4.10252642330845	6.12728692552244e-05
cg24375895	`	1	Island		-7.89966645223173	2.79650757065459e-15	-7.13682187287187	2.67674589100993e-12	-3.43214297582533	0.000745712898362773
cg07377662	`METRNL	17	Island	TSS1500	-7.89736914929248	2.84851791437056e-15	-6.87359168286031	1.53307097947301e-11	-3.88883137758606	0.00014100909605379
cg21936550	`TBL2	7	Island	Body	-7.89696968336571	2.85765842496906e-15	-6.37026259754017	3.70440988714058e-10	-4.77013431155499	3.66203792686905e-06
cg05201033	`TARSL2	15	Island	1stExon	-7.89281947870031	2.95434808646459e-15	-7.1819172513406	1.97428367157518e-12	-3.33929543456946	0.00102583648326203
cg23704066	`SHFM1	7	Island	1stExon	-7.88966168507264	3.03006829676423e-15	-7.44872688006349	3.15758226828614e-13	-2.86532671595279	0.00469940791900159
cg24052698	`	1	Island		-7.88964683747575	3.03042879998411e-15	-8.34260605434954	4.64254454773388e-16	-1.3048175213017	0.194513511677685
cg07287255	`GNAO1;GNAO1	16		Body;Body	7.88774896460041	3.07685902575775e-15	6.67114320277213	5.654903119586e-11	4.22422089381774	3.75477411259706e-05
cg09783858	`EIF1AD;EIF1AD;BANF1;BANF1	11	Island	1stExon;5'UTR;TSS200;TSS200	-7.88584039043203	3.12425729163591e-15	-6.69290785540329	4.92220135512598e-11	-4.18222619083779	4.45153104789704e-05
cg23733744	`C11orf17;ST5;C11orf17	11	N_Shore	TSS1500;TSS200;TSS200	-7.88507105558553	3.14356591105285e-15	-7.17891659087478	2.01477814252871e-12	-3.32891964087672	0.00106261128824175
cg00810208	`IDUA	4	Island	Body	-7.88428686053633	3.16336840667797e-15	-7.23793939769642	1.34967735437067e-12	-3.22389693852024	0.00151054447102126
cg10723012	`DCXR	17	Island	Body	-7.87759526099328	3.33741725394898e-15	-6.92682794415136	1.08185460159335e-11	-3.7556328930744	0.000233000079737459
cg03088791	`PLCE1	10	S_Shore	5'UTR	-7.87455941997468	3.41945667166433e-15	-6.56550777470376	1.10306447306402e-10	-4.38273860028717	1.95223621508765e-05
cg18561261	`	7			7.87446871951809	3.42193803032702e-15	7.21122558317223	7.3963451272163e-13	3.40481872149849	0.000819665317741451
cg09000779	`	3			7.87405771609501	3.43320438840739e-15	6.39160962132809	3.24970984520831e-10	4.68649133645191	5.30278503476198e-06
cg26050004	`B3GALNT2;B3GALNT2	1	Island	1stExon;5'UTR	-7.87306171629075	3.46065828315903e-15	-6.55130616566217	1.20591631316671e-10	-4.40460558460242	1.78127948645798e-05
cg12010396	`NOVA2	19	Island	Body	-7.87130153685555	3.5097056689614e-15	-6.73570476160189	3.74265363173433e-11	-4.07788632792338	6.7570427985898e-05
cg26800554	`FGFRL1;FGFRL1;FGFRL1	4	Island	TSS1500;TSS1500;TSS1500	-7.87098248627792	3.51866899510505e-15	-7.16112011815993	2.28282717083104e-12	-3.33301433079272	0.00104795418828854
cg12272413	`RPS6KC1;RPS6KC1	1	Island	Body;Body	-7.86904519171591	3.5735807863745e-15	-7.68620657517686	5.90233275361544e-14	-2.4075323655107	0.0172170119214281
cg05620842	`KCTD15;KCTD15;KCTD15	19	Island	TSS1500;TSS1500;TSS1500	-7.8616721298227	3.79039103532456e-15	-6.1738314965076	1.21491354578362e-09	-5.04316684191796	1.0579833151862e-06
cg09942736	`ITGA7;ITGA7;ITGA7	12		Body;Body;Body	7.85871825864574	3.88084033488071e-15	7.15937732774169	2.29916944254608e-12	3.30998906288027	0.00113289043421096
cg03345037	`GPR83;GPR83	11	Island	1stExon;5'UTR	-7.85711606776724	3.930785837303e-15	-6.53870978531709	1.30496438236521e-10	-4.3945065796247	1.85836843574844e-05
cg18376163	`KIFC2;CYHR1;CYHR1;CYHR1	8	Island	TSS1500;TSS200;TSS1500;TSS200	-7.85657749321163	3.94771665965749e-15	-6.90496705789789	7.24881301187426e-12	-4.02562847080119	8.30277862253405e-05
cg27541048	`GNB3	12		Body	7.85540757388643	3.98474242218694e-15	7.87534876638169	1.5059017809182e-14	2.04853368951495	0.0422852793639178
cg20414811	`RERE;RERE;RERE	1	S_Shore	Body;Body;Body	7.85128626099254	4.11791832820519e-15	6.84307232345447	1.92393680708626e-11	3.87751030503862	0.000167412419756762
ch.8.39446R	`	8			-7.85006753422346	4.15813298802353e-15	-6.97478034682249	1.16636854996456e-11	-3.70907484851724	0.000276832192407762
cg14316565	`CAT	11	Island	Body	-7.84823845666147	4.21921417378021e-15	-6.42649772793166	2.62149728581165e-10	-4.57325067744756	8.68599467082815e-06
cg18094366	`MIF	22	Island	3'UTR	-7.84806953954496	4.22489943688213e-15	-6.9287012663577	1.06862160853775e-11	-3.69277344887397	0.000293939558921698
cg04718414	`CDC16;CDC16	13	Island	TSS200;TSS200	-7.84793438698749	4.22945371299847e-15	-6.55320968151988	1.19160383056434e-10	-4.35056820400958	2.23262368695526e-05
cg19487819	`MAD1L1;MAD1L1;MAD1L1	7		Body;Body;Body	7.84736643958462	4.2486448946941e-15	6.3974982572329	3.13420586248034e-10	4.62231413858603	7.02167484410555e-06
cg20541753	`PDHX;PDHX;PDHX;PDHX;APIP;PDHX	11	Island	5'UTR;5'UTR;1stExon;1stExon;TSS200;1stExon	-7.84521985521408	4.321956322893e-15	-6.0879115054558	2.02247903781517e-09	-5.16054881053556	6.10929453918457e-07
cg07718321	`MANEA	6	Island	TSS200	-7.84509360690168	4.32630659517628e-15	-7.84085980120606	2.00000719729901e-14	-2.10941966309007	0.0365795499124157
cg01099876	`SEPT10;ANKRD57;SEPT10	2	Island	TSS200;TSS200;TSS200	-7.84337186692723	4.38606646102808e-15	-6.87017154661191	1.56767273014983e-11	-3.78587079921233	0.00020813899885336
cg12333398	`CXXC5	5	Island	TSS200	-7.84009989849791	4.50188133117614e-15	-6.20028773911193	1.03720507745901e-09	-4.95327299953881	1.60114934273395e-06
cg19513193	`DLG4;ACADVL;ACADVL	17	Island	TSS200;Body;Body	-7.83897113918953	4.5425292951735e-15	-6.5836762739353	9.83938753145261e-11	-4.27908815759181	3.00025634927345e-05
cg10233455	`TARDBP	1	Island	TSS200	-7.83838398864219	4.56381591955217e-15	-6.57247548249573	1.05579598068176e-10	-4.29753335573087	2.78095013974424e-05
cg14353573	`CDH17;CDH17;CDH17	8		5'UTR;1stExon;5'UTR	7.83738683345976	4.60019212323367e-15	5.86936711063971	7.42110020572431e-09	5.79760791572636	4.32615424263269e-08
cg03440066	`WFDC3;DNTTIP1	20	Island	TSS200;1stExon	-7.8365177103716	4.63213042485718e-15	-6.9291974542299	1.06514328363293e-11	-3.66859482699597	0.000321159687417095
cg22837726	`C19orf45	19	Island	Body	-7.8364403176239	4.63498499476693e-15	-6.22366577445752	9.04021078793236e-10	-4.90254787814519	2.01806986629764e-06
cg25394652	`SRD5A1;NSUN2	5	Island	TSS200;TSS1500	-7.83596785320077	4.65244906324179e-15	-7.1417163868553	2.58995301273388e-12	-3.29503545956567	0.00119143920486604
cg10040196	`EML1;EML1	14	Island	TSS1500;TSS1500	-7.83509024082379	4.68506101991588e-15	-6.27429458052742	6.64398392040676e-10	-4.81346399382226	3.01725264674092e-06
cg25224992	`ZNF354A	5	Island	TSS200	-7.83495620164893	4.69006166777951e-15	-6.68459054130792	5.19049895106336e-11	-4.09412968954321	6.33532739769348e-05
cg11234708	`ACHE;ACHE	7	Island	5'UTR;5'UTR	-7.83409713605125	4.72223612364794e-15	-6.43950059674685	2.41918573962705e-10	-4.52192846315899	1.08309366329732e-05
cg15605918	`DOHH;DOHH	19	S_Shore	TSS1500;TSS200	-7.83315760482621	4.75767304129817e-15	-6.60003111485959	5.57332349127078e-11	-4.82780039164361	2.82917118595546e-06
cg00548633	`GPR4	19	Island	Body	-7.83176636412813	4.81062872872697e-15	-6.65585486000233	3.85662347291041e-11	-4.66602210948955	5.80137097891825e-06
cg12436443	`SPR	2	Island	TSS200	-7.83130377085571	4.82836492877152e-15	-7.21304836041468	1.59863822322829e-12	-3.1606115856139	0.00185934293543272
cg04198107	`	10	Island		-7.82971564657739	4.88974614430595e-15	-5.98699459280792	3.65177695925548e-09	-5.30612660833696	3.05335716314439e-07
cg04393883	`HSD3B7;HSD3B7;HSD3B7	16		3'UTR;Body;3'UTR	7.82904066368365	4.91606635490457e-15	8.69515309834988	2.98800934509328e-17	0.558583718375245	0.577990648155387
cg03082934	`VDAC3;VDAC3	8	N_Shore	TSS1500;TSS1500	-7.82893231113316	4.92030441377065e-15	-7.85697981259264	1.72153466097863e-14	-2.02730497801646	0.044445447850744
cg09438491	`WRN;PURG;PURG;PURG;WRN	8		1stExon;TSS1500;1stExon;5'UTR;5'UTR	-7.82839510956844	4.94136948171139e-15	-6.22823266844163	8.77102800254385e-10	-4.88068046992269	2.22859154653566e-06
cg00630583	`PXMP2;POLE	12	Island	1stExon;TSS1500	-7.82471109056497	5.08824077961871e-15	-7.11075258753634	3.20389652675603e-12	-3.32787891518831	0.00106636693147756
cg04121495	`SEPSECS;SEPSECS;SEPSECS	4	Island	TSS200;TSS200;TSS200	-7.82255344164835	5.17624677734764e-15	-7.21249162706792	1.60469402405963e-12	-3.14393106529301	0.00196296044951346
cg06012509	`KLC4;KLC4;KLC4;MRPL2;KLC4	6	Island	TSS1500;TSS200;TSS200;TSS200;TSS1500	-7.82114800436971	5.23437574449144e-15	-7.56563919742409	1.39028800441373e-13	-2.52218672557787	0.0126378842343527
cg20800956	`DNM3;DNM3	1	S_Shore	Body;Body	-7.81796685889242	5.3683318980709e-15	-6.88629492599201	1.41099199323121e-11	-3.70635211462346	0.000279622605025515
cg23921342	`CSMD2	1	Island	Body	-7.81710049206399	5.40539506487663e-15	-6.56837021564046	1.08340007838947e-10	-4.26178266385497	3.22099023049387e-05
cg14924697	`MAP4K4;MAP4K4;MAP4K4	2	Island	TSS1500;TSS1500;TSS1500	-7.81451106364722	5.51767879960546e-15	-7.02047830647955	5.82782232524826e-12	-3.46421611529975	0.000666879954720223
cg24871540	`MYH14;MYH14;MYH14	19	Island	5'UTR;5'UTR;5'UTR	-7.81338006956421	5.56743885440719e-15	-6.94668141745788	9.49428852057208e-12	-3.59126669632052	0.000425037999453605
cg20288518	`C10orf35	10	Island	TSS200	-7.81225486074214	5.61738265952643e-15	-6.61238663635535	8.2092517010245e-11	-4.17486431364427	4.58576004721513e-05
cg10301941	`	17	S_Shelf		7.81076904779559	5.68400854138484e-15	6.96581221507312	8.36938020703608e-12	3.55247057034281	0.000488356318968065
cg10457436	`LPAR5	12		TSS1500	7.81054738322912	5.69401473520951e-15	5.90031353094199	6.02588782940054e-09	5.41936212830029	1.76353669176078e-07
cg00107016	`HAP1;HAP1;HAP1	17	Island	TSS200;TSS200;TSS200	-7.81039255168442	5.70101429307165e-15	-6.64736604384462	6.72208364258754e-11	-4.10673615796667	6.02545261177635e-05
cg12835048	`FGFR2;FGFR2;FGFR2;FGFR2;FGFR2;FGFR2;FGFR2;FGFR2;FGFR2;FGFR2;FGFR2	10	Island	5'UTR;5'UTR;TSS1500;5'UTR;1stExon;1stExon;1stExon;5'UTR;5'UTR;1stExon;1stExon	-7.80967215243975	5.73369333508245e-15	-6.66024381668416	6.06099421265617e-11	-4.08578091995665	6.5488448475782e-05
cg01470704	`TCP11L1;TCP11L1	11	Island	TSS1500;TSS200	-7.80616756233566	5.89531901546514e-15	-6.93150029996141	1.05347261341825e-11	-3.60394490800358	0.00040607867736747
cg20791839	`SELK	3	Island	TSS200	-7.80532150563223	5.93500484036382e-15	-6.85246885840777	1.75939526784753e-11	-3.74011844386013	0.000246820526299036
cg22120488	`	2			-7.80476427215776	5.96128640177013e-15	-6.00493841294517	3.28958068837585e-09	-5.224332843808	4.51597913669549e-07
cg10392721	`TTC9	14	N_Shore	TSS1500	-7.80459211762369	5.96942909917535e-15	-6.3127338605351	5.26254410370578e-10	-4.68455881986889	5.34803145562226e-06
cg05674466	`FBXL22	15	Island	3'UTR	-7.79848923283991	6.26526977838032e-15	-6.69079565720675	3.05842082678799e-11	-4.46769844107292	1.36478918886575e-05
cg07718650	`FES;FES;FES;FES	15		Body;Body;Body;Body	7.79685920442175	6.34669845488482e-15	7.58058245219792	1.25096935919832e-13	2.44698852764411	0.0154979003865642
cg12751733	`CDCA8	1	Island	TSS1500	-7.79631771153064	6.37397874971313e-15	-7.14815632051506	2.47995829426223e-12	-3.20374397060508	0.00161441401802715
ch.5.3291566R	`	5			-7.79432673235706	6.47527984328193e-15	-6.47322914132519	2.63112409651221e-10	-4.34202724726276	2.3133160903387e-05
cg27408600	`RAPGEF3;RAPGEF3;RAPGEF3	12	Island	TSS1500;TSS1500;TSS1500	-7.79332056410096	6.52707482895054e-15	-6.44518855124813	2.34296572876264e-10	-4.42836891353286	1.61180301052095e-05
cg07636037	`WDR6	3	Island	1stExon	-7.79003526828584	6.69904933032865e-15	-6.8857499035505	1.41602802649191e-11	-3.65094754065801	0.00034250859682328
cg25696485	`PIGP;PIGP;TTC3;PIGP	21	Island	TSS1500;TSS1500;5'UTR;TSS1500	-7.78766504303808	6.82588478668853e-15	-7.31726555784844	7.84413095197733e-13	-2.88991255290284	0.00436186889771412
cg18107144	`TINAGL1;TINAGL1	1		5'UTR;1stExon	-7.7870410758127	6.85966565913375e-15	-7.57421094932654	1.30860505424751e-13	-2.43834409451393	0.0158609509745935
cg21854408	`	1	Island		-7.7869072564317	6.86693188823278e-15	-6.43103176687792	2.54913926239415e-10	-4.44155179693275	1.52457543192085e-05
cg06876708	`CYB5R1	1	S_Shore	TSS200	-7.78638765209266	6.8952176562468e-15	-6.89881528819868	1.30002521619497e-11	-3.62068973154677	0.000382255514284141
cg23966123	`MTA1	14		TSS200	-7.78351207687417	7.05384157545988e-15	-7.43590684112293	3.58689866062199e-13	-2.51440704354161	0.0133304796977449
cg13228431	`STK17B	2	S_Shore	TSS200	-7.78342717245185	7.05857929666955e-15	-6.65259875053685	6.36275642320445e-11	-4.04622272766632	7.6572065464856e-05
cg12904795	`VPS54;VPS54	2	N_Shore	5'UTR;5'UTR	-7.7831940196454	7.07160548790708e-15	-6.02627962498406	2.9042789175987e-09	-5.1434073367734	6.62313520622364e-07
cg25104457	`	1	Island		-7.78312875404863	7.07525609775623e-15	-6.33736647667448	4.52950390831664e-10	-4.59808064349009	7.80117579453659e-06
cg16040763	`PITPNC1;PITPNC1;PITPNC1;PITPNC1	17	Island	5'UTR;1stExon;1stExon;5'UTR	-7.78193421106712	7.14240107461421e-15	-7.05092192588707	4.75915408659871e-12	-3.34512931496921	0.00100568408043222
cg00213479	`	5	Island		-7.78186821843431	7.14612873065134e-15	-7.1966810306307	1.7864095849846e-12	-3.08954615934791	0.00233901975795007
cg04536008	`NME6	3	Island	Body	-7.77919331393231	7.29884579695692e-15	-6.96388631100663	8.47642169493534e-12	-3.49213298675798	0.000604684978767053
cg15056119	`CBLL1;CBLL1	7	Island	TSS200;TSS200	-7.77852047583334	7.33776268610918e-15	-6.42588087747669	2.63149558421115e-10	-4.43365632139485	1.57625716955064e-05
cg04904530	`ALKBH5	17	Island	TSS1500	-7.77679752286753	7.43835162548622e-15	-6.38310718820016	3.43433321104664e-10	-4.50363494591191	1.17121062915748e-05
cg15103675	`UAP1;UAP1	1	Island	5'UTR;1stExon	-7.77285156203477	7.67386501300554e-15	-6.30720241439721	5.44246025827587e-10	-4.63020755235331	6.78438355804985e-06
cg12972275	`EXOSC9;EXOSC9	4	Island	TSS200;TSS200	-7.7709178362451	7.79194320061786e-15	-7.34370986463083	6.53898683610458e-13	-2.80977545760292	0.00555143319521228
cg02930667	`CYP27A1	2		Body	-7.77085656874482	7.79571342811314e-15	-6.42219976242554	1.76745198456218e-10	-5.14327822433168	6.62716030029582e-07
cg06807593	`POLI;POLI	18	Island	1stExon;5'UTR	-7.77072099808936	7.80406244336011e-15	-7.20033153790465	1.74273595860461e-12	-3.06065584848424	0.00256481430107205
cg06488775	`	19	Island		-7.77028016185599	7.8312718859204e-15	-7.01864903120649	5.89905691758017e-12	-3.37817386396015	0.000898331822042051
cg07264792	`PDXP	22	Island	TSS200	-7.76838776637599	7.94913952042094e-15	-5.9508922035402	4.5022127061238e-09	-5.24565176518776	4.07972203078847e-07
cg11877577	`RPS12;SNORD101	6	Island	TSS200;TSS1500	-7.76486018105369	8.1735339651032e-15	-6.71667084131477	4.22837743054494e-11	-3.89646916941762	0.000136950745131412
cg16048568	`NR2F2;NR2F2;NR2F2;NR2F2;MIR1469;NR2F2	15	Island	TSS1500;1stExon;Body;5'UTR;TSS1500;TSS1500	-7.76298691023921	8.29521769489201e-15	-6.06259219286412	2.347518577748e-09	-5.03899431292302	1.07865702262824e-06
cg24881330	`TRMU	22	Island	Body	-7.75800667133696	8.62746144615932e-15	-6.2385429114162	8.24358595041656e-10	-4.72058301113377	4.56273288988328e-06
cg15558982	`TSPAN2	1	Island	TSS200	-7.75692131379383	8.70158798480208e-15	-6.50550322298047	1.60585761879897e-10	-4.25053192963126	3.3727399980687e-05
cg11065458	`UBL4B	1		TSS1500	7.75642655026165	8.73558643898951e-15	7.7923683974041	2.7509425784842e-14	1.9942391212778	0.047996653867137
cg05146756	`LOC554202	9	N_Shore	Body	7.75606299952122	8.76065168989428e-15	7.17416182905817	9.64969290990905e-13	3.10772014562263	0.00220652788321983
cg19322825	`	7	Island		7.75579215591837	8.77937117923163e-15	6.48278625614838	1.91313443850544e-10	4.38840300461345	2.31397445392924e-05
cg16469258	`SLC12A2;SLC12A2;FLJ33630	5	Island	1stExon;5'UTR;TSS1500	-7.75549432167327	8.80000158643826e-15	-7.39476986655475	4.76974354141592e-13	-2.53466623242655	0.0126193000011642
cg25499461	`IRF2BP1	19	Island	TSS200	-7.75450414382227	8.86893287591583e-15	-6.55073326377347	1.2102568218271e-10	-4.16638674676342	4.74512000981743e-05
cg10228629	`ATAD3B	1	Island	TSS1500	-7.75448617104488	8.87018894922911e-15	-6.55292883256388	1.19370501228778e-10	-4.16250263943867	4.81988658232875e-05
cg09123989	`	12			-7.75428513437715	8.88425084561414e-15	-6.65679409742537	3.83484074433191e-11	-4.42964512462138	1.60315359338854e-05
cg26365885	`CCDC46	17	Island	TSS1500	-7.75309811119131	8.9677277726802e-15	-6.24872159216045	7.75333831577207e-10	-4.69283998740821	5.15672592142315e-06
cg16104263	`ARHGEF16	1	Island	Body	7.75288956477933	8.98247322562561e-15	7.01100072294832	6.20627143395842e-12	3.35648753379847	0.000967503220057036
cg00940809	`NDUFV3;NDUFV3	21	Island	TSS1500;TSS1500	-7.74816116375954	9.3232765173583e-15	-6.46667039366553	2.04453994821399e-10	-4.300912333042	2.74247537239988e-05
cg26653400	`	2			-7.74596613170739	9.48577943528079e-15	-6.80569234293758	2.3836916365359e-11	-3.70233061168204	0.000283792669100034
cg25260653	`HABP4	9	Island	TSS200	-7.74493687898485	9.56293403227465e-15	-6.56409179451719	1.112920827849e-10	-4.12367064715129	5.63187600601208e-05
cg21155063	`GLRX2;GLRX2	1	Island	Body;Body	-7.74320442343972	9.69419888831136e-15	-7.23588967074684	1.36864884987099e-12	-2.94281613003736	0.00370938918986098
cg00800569	`TRAF3IP1;TRAF3IP1	2	Island	1stExon;1stExon	-7.74266107961011	9.73573108766379e-15	-7.10127400591223	3.47750452503719e-12	-3.18555478251205	0.00171380847943172
cg23953309	`FYN	6	Island	5'UTR	-7.74262552388899	9.73845499723889e-15	-6.22588842148394	8.89547897018277e-10	-4.71172488398759	4.74482517736567e-06
cg19388101	`WDR4;WDR4	21	S_Shore	TSS1500;TSS1500	-7.74091947208467	9.87004003253929e-15	-7.0019890656373	6.58845690133835e-12	-3.34812791506083	0.000995469999980575
cg18494124	`HGSNAT	8	Island	Body	-7.73840737249503	1.00669850279085e-14	-7.00802182837803	6.33013276793991e-12	-3.33248634215849	0.00104983350588799
cg10020333	`S1PR1	1	S_Shore	5'UTR	-7.73675006521004	1.0199027513618e-14	-6.29386195341024	5.90148574886941e-10	-4.58074255544085	8.40932021694994e-06
cg26058016	`CRYBA2;CRYBA2;CRYBA2	2	Island	TSS1500;TSS1500;TSS1500	-7.73667324790255	1.02051889265424e-14	-6.25726495129136	7.36395440951374e-10	-4.6447256006179	6.36796059732061e-06
cg11083416	`	3			-7.73586024121201	1.02706240487775e-14	-6.82920345221181	2.04669896557216e-11	-3.64073479198468	0.000355467172563032
cg20174696	`	6	S_Shore		-7.73335745094707	1.04746647744895e-14	-6.41047158498085	2.89373139516957e-10	-4.3695329002898	2.06298545910473e-05
cg06936079	`C1orf38;C1orf38;C1orf38	1	N_Shore	TSS200;TSS200;TSS200	-7.73284034383063	1.05173166471902e-14	-7.10441292468116	3.42125700713613e-12	-3.16216762189174	0.00184993967901267
cg08261666	`VAMP2;VAMP2	17	Island	5'UTR;1stExon	-7.7302287303927	1.07353519092701e-14	-6.40871921083217	2.92512627015722e-10	-4.36629095823731	2.09108108967788e-05
cg24928389	`SRCIN1	17	N_Shore	Body	7.72982746770682	1.07692439175026e-14	6.76623589171624	3.07549376232813e-11	3.73891573904943	0.000247923645142476
cg25699417	`TRAPPC9;TRAPPC9	8		Body;Body	7.72836702370105	1.08934893183132e-14	6.83355830644502	2.27657274379116e-11	3.6250714632012	0.000446212990902217
cg23333501	`FAM108A1;FAM108A1	19	S_Shore	TSS200;TSS200	-7.72705555406413	1.10062622944063e-14	-6.27878895228409	6.46575359724792e-10	-4.58759735841389	8.16361904711858e-06
cg05156582	`SKI	1		Body	7.72687179572708	1.10221551160455e-14	6.32326608503904	3.04968025322096e-10	5.93474766532291	1.31084640397348e-08
cg06762902	`PELI2	14	N_Shore	TSS1500	-7.72615061881635	1.10847465100714e-14	-6.25758182542307	7.34988606399414e-10	-4.62293793231045	7.00263518321149e-06
cg27168858	`DHCR24	1	N_Shore	Body	7.72428074297421	1.12486678973096e-14	6.52943425700431	8.04168984255999e-11	5.21510061457348	4.71866383795588e-07
cg11758458	`PRKCA	17		Body	7.72364690700423	1.13047721917236e-14	7.99053416772092	6.46968739065936e-15	1.58080181903243	0.116360497971726
cg14981312	`C1orf159	1	Island	5'UTR	-7.72323717800614	1.13411859851252e-14	-6.54562354530777	1.24965302701546e-10	-4.11225197985351	5.89446455381853e-05
ch.4.183293081R	`	4			7.72185616131685	1.14647730799487e-14	7.6363418089524	1.1464509506936e-13	2.38737435174637	0.0181586975041793
cg27552955	`TRPC1	3	Island	TSS1500	-7.72173107890982	1.14760319269765e-14	-6.42105151150703	2.7110737206533e-10	-4.32753161970578	2.45670241667469e-05
cg21874514	`HIBADH	7	Island	TSS200	-7.72118309465432	1.15254851523518e-14	-5.70546743263532	1.81599927784347e-08	-5.58052218809413	7.96202295136037e-08
cg00184876	`CCDC46	17	Island	TSS200	-7.72098156900843	1.15437246660535e-14	-7.09109351243404	3.65513233586812e-12	-3.15331655445904	0.00190401999096721
cg10221930	`ZNRD1;NCRNA00171;ZNRD1	6	S_Shore	1stExon;TSS1500;Body	-7.72021454172588	1.16134062737549e-14	-7.05246984364966	4.71029589983353e-12	-3.21787991416143	0.00154088831147382
cg18210275	`	13			7.71924646711989	1.17019433741315e-14	7.33152344169088	8.45953444313566e-13	2.55876230756345	0.0120878173676071
cg08248359	`UBE2S	19	Island	Body	7.71867070551837	1.17549153720386e-14	7.41737339904414	3.92760082326379e-13	2.57525337436659	0.0109130417026893
cg21656824	`TSKU	11	Island	5'UTR	-7.71837577671742	1.17821411280719e-14	-6.37294014079434	3.64413174439465e-10	-4.40507890684145	1.7777427914179e-05
cg07308751	`EPB41L2;EPB41L2;EPB41L2	6		5'UTR;5'UTR;5'UTR	7.71779801203771	1.183565626679e-14	7.31403022319077	8.02044269807849e-13	2.75460646897248	0.00653429253322463
cg25914931	`KIF11	10	Island	TSS200	-7.7158488737648	1.20179646469308e-14	-6.67576852109627	5.49074722783551e-11	-3.86925855266982	0.000151936239840527
cg13457515	`SP6	17		TSS1500	7.71475078430419	1.21218859667368e-14	7.50526356330738	1.00695546603006e-13	1.91733641275228	0.057193509767748
cg01708493	`INSIG1;INSIG1;INSIG1	7	Island	TSS200;TSS200;TSS200	-7.71432867119959	1.21620688811494e-14	-5.87429999149974	6.99478067710925e-09	-5.27080412251634	3.61752137826935e-07
cg03530144	`B3GNTL1	17	Island	TSS200	-7.71417624707452	1.21766110299987e-14	-7.30568328803436	8.4935179452754e-13	-2.76192696507554	0.00639537938125794
cg15803869	`	10	Island		-7.71382859507466	1.22098430995744e-14	-6.92737075630438	1.11519443676601e-11	-3.39334471316244	0.000926359393789352
cg21454030	`NCAPG;DCAF16;NCAPG	4	Island	5'UTR;TSS200;1stExon	-7.71334861709245	1.22558709181494e-14	-6.18461585560099	1.15504452958226e-09	-4.71462834698793	4.68438126767065e-06
cg24405381	`	1			7.71249482333615	1.23381683967219e-14	6.62836303765618	7.4200299205125e-11	3.94557126343768	0.000113390266883568
cg10816738	`WHSC2	4	Island	TSS200	-7.71101514859254	1.24820844534774e-14	-6.79911793265056	2.48729103745903e-11	-3.64332925967244	0.000352132080769334
cg06201907	`RHOC;RHOC;RHOC;RHOC;RHOC	1	Island	TSS1500;5'UTR;1stExon;1stExon;5'UTR	-7.71032370763325	1.25499003873178e-14	-7.37685618848925	5.20136759719738e-13	-2.62941938808074	0.00937281732037107
cg20589264	`CEP55;CEP55	10	Island	TSS200;TSS200	-7.71016978313066	1.25650464350617e-14	-7.01526506783348	6.03309493238925e-12	-3.26281501871782	0.00132728939609407
cg07907998	`GTF3C1;KIAA0556	16	Island	TSS200;TSS200	-7.70940738445848	1.26403314255889e-14	-6.78548875543045	2.71632947221232e-11	-3.66397095150868	0.000326628823896035
cg17714276	`GUCY1A3;GUCY1A3;GUCY1A3;GUCY1A3;GUCY1A3;GUCY1A3;GUCY1A3	4	Island	5'UTR;5'UTR;5'UTR;5'UTR;5'UTR;TSS200;5'UTR	-7.70520479802504	1.30633620530716e-14	-6.82192143575704	2.20655006303159e-11	-3.58881652499307	0.000473659159551019
cg06238300	`ASPSCR1	17	Island	Body	7.70319809270828	1.32702400244681e-14	5.98137139121562	3.77308489071391e-09	5.06069719265554	9.75243929331661e-07
cg24495832	`MAPK14;MAPK14;MAPK14;MAPK14	6	S_Shore	Body;Body;Body;Body	-7.70098554647449	1.35020763742787e-14	-6.78997003413999	2.63882712831054e-11	-3.63912388977702	0.000357552874892186
cg26220018	`	8	Island		-7.69911192888547	1.37015115776941e-14	-6.82274773209942	2.19478139186597e-11	-3.57329086636091	0.00050007769320354
cg14507560	`IRX4	5	Island	TSS200	-7.69831016562303	1.3787737323623e-14	-6.76723520265686	3.05575580313712e-11	-3.67356947471668	0.000315372113440678
cg24672547	`TPI1;TPI1;TPI1	12	Island	Body;Body;TSS200	-7.69829095385967	1.37898099918523e-14	-6.5242562506704	1.42845480363726e-10	-4.09936326875818	6.20488184347371e-05
cg16229772	`HRAS;HRAS;HRAS	11	Island	TSS200;TSS200;TSS200	-7.69823041997375	1.37963427176066e-14	-6.34263377891602	4.38624317592661e-10	-4.41754343580207	1.68699527947597e-05
cg20480522	`MTERFD1;PTDSS1	8	S_Shore	TSS1500;Body	-7.69794562816192	1.3827117905441e-14	-6.65670087806997	6.19905336563862e-11	-3.86655075712358	0.000153509713508409
cg15192688	`COMMD3	10	Island	TSS200	-7.69786507078972	1.38358353489823e-14	-6.5906600741941	9.4158429961524e-11	-3.98212796582726	9.84071509752229e-05
cg12471071	`MCPH1	8		Body	7.69761784218906	1.38626227472626e-14	7.04532233532054	5.74185130382664e-12	3.10914504645733	0.00243669161277197
cg16430510	`FJX1	11	Island	TSS200	-7.6967461269974	1.39574815131949e-14	-6.37753034466008	3.54302038257633e-10	-4.35339051478654	2.20655751723867e-05
cg12169365	`RIN3	14	N_Shore	TSS1500	-7.69340942734116	1.43265134688004e-14	-7.09881732092459	3.45530834621077e-12	-3.08256690811241	0.0023918214999103
cg16023415	`	1	Island		-7.6931402238287	1.4356701901067e-14	-6.34544087156895	4.31171606127499e-10	-4.40235298147486	1.79820380410394e-05
cg08519447	`RAX2	19	N_Shore	3'UTR	7.69289600365237	1.43841428460134e-14	8.08737267885159	3.15598100490594e-15	1.34903906714843	0.179881525913833
cg25471831	`AES;AES;AES	19	Island	Body;Body;Body	-7.69215511875088	1.44677059116248e-14	-5.95731288108335	4.39081747738602e-09	-5.06594165088087	9.5173474265064e-07
cg05635121	`C17orf81;DULLARD;C17orf81;C17orf81;C17orf81;DULLARD	17	N_Shore	TSS1500;Body;TSS1500;TSS1500;TSS1500;Body	-7.69013883350456	1.46975453153238e-14	-6.32933093567551	4.75691524894832e-10	-4.42453029640546	1.63808975335712e-05
cg12538400	`GAS2L1;GAS2L1;GAS2L1	22	Island	TSS200;TSS200;TSS200	-7.68644383798386	1.51281048515048e-14	-6.19554860232317	1.0670522771454e-09	-4.65153473170667	6.18124396623536e-06
cg03400107	`GAPDH	12	Island	TSS200	-7.68518263535758	1.52778885236737e-14	-6.13580373009348	1.53158002847075e-09	-4.74932163083724	4.01721764905919e-06
cg03744724	`GYS1;GYS1;RUVBL2;GYS1	19	Island	TSS200;TSS200;TSS1500;TSS200	-7.68475509345048	1.53289949011828e-14	-6.37753982124974	3.54281450246889e-10	-4.32917866138134	2.43999139744269e-05
cg03331468	`RAPGEF6;RAPGEF6;RAPGEF6;RAPGEF6;RAPGEF6;RAPGEF6	5	Island	TSS200;TSS200;TSS200;TSS200;TSS200;TSS200	-7.68446795470409	1.53634125114785e-14	-6.83987523433994	1.90961082235782e-11	-3.51833373750717	0.000551297048135635
cg11668844	`MCF2L;MCF2L	13	N_Shore	Body;Body	-7.67885793609141	1.60513117306457e-14	-7.06673903909257	4.28250099615869e-12	-3.10942399334742	0.00219446849508753
cg20319308	`NVL;NVL	1	Island	TSS1500;TSS1500	-7.67871316092674	1.6069459325091e-14	-6.34715825406404	4.26673261797805e-10	-4.37023257225297	2.0569695611879e-05
cg16174779	`TNFRSF11A	18	S_Shore	Body	-7.6774451125639	1.62292745504277e-14	-6.87913381018403	8.59832357924795e-12	-3.57339430067436	0.00045318257623144
cg14084042	`FIGNL1;FIGNL1	7	Island	5'UTR;5'UTR	-7.67699208946227	1.62867484345836e-14	-6.68280205982631	5.25003744277031e-11	-3.77852756078325	0.000213934769334062
cg25070565	`CYTSB;CYTSB	17		Body;Body	7.67696425204128	1.62902866201442e-14	7.45616644972949	2.99791484570066e-13	2.42311227623026	0.0165190234586797
cg02703032	`BRD2;BRD2;BRD2	6	N_Shore	5'UTR;1stExon;5'UTR	-7.6754690744045	1.64814415648113e-14	-6.91377483820864	1.17863334659233e-11	-3.37066330470456	0.000921747585659092
cg18469778	`TSG101	11	Island	TSS200	-7.67499046385053	1.65430957762005e-14	-6.95861761323398	9.04369403271488e-12	-3.24137616063512	0.00153097234217992
cg05072819	`KAT2B	3	N_Shore	TSS200	-7.67433978435214	1.66272798368737e-14	-6.09287622517598	1.99006805647657e-09	-4.795508382471	3.26990157896503e-06
cg16856981	`ZNF766	19	Island	Body	-7.67269605038772	1.68418256734514e-14	-6.34868504846169	4.22712701723407e-10	-4.35541559597233	2.18803437679283e-05
cg13792075	`ABCC5;ABCC5	3	Island	TSS200;TSS200	-7.67265639173176	1.68470355637724e-14	-6.70192304677209	4.64674331470768e-11	-3.73626861505333	0.000250368010779626
cg14057952	`	2			7.67245641521592	1.68733303036977e-14	6.21329297406041	9.78727515637532e-10	4.75578986030221	5.02748287132221e-06
cg13504283	`DACT2	6	N_Shore	3'UTR	7.67157015737264	1.69903503963476e-14	7.01823449298137	6.10137408974999e-12	3.11201166456553	0.00231681280395538
cg25026401	`SLC15A4	12	Island	TSS200	-7.66667201685915	1.76516383370519e-14	-7.14940081626328	2.45923794746893e-12	-2.93996668360203	0.00374211808062046
cg09072216	`SPG20;SPG20;SPG20;SPG20	13	N_Shore	5'UTR;5'UTR;5'UTR;5'UTR	-7.66524032666037	1.78496653926336e-14	-7.16087159670978	2.2760936737505e-12	-2.91697474375442	0.00401603550058884
cg26394244	`NID2	14	Island	TSS200	-7.66511778376765	1.78667163429373e-14	-6.8007281377404	2.47099107549827e-11	-3.54848853430278	0.000495334306145787
cg27101428	`PVRL1;PVRL1;PVRL1	11	Island	TSS200;TSS200;TSS200	-7.66509984047947	1.78692143652426e-14	-7.52647437187736	1.83209016049752e-13	-2.27595443591972	0.0242275256470621
cg01667133	`DDB2	11	Island	TSS200	-7.6646285370611	1.79349512952808e-14	-6.21483539710375	9.53227596276481e-10	-4.57191820542809	8.736111714553e-06
cg03993166	`SELS;SELS	15	Island	TSS1500;TSS1500	-7.66312095288899	1.8146829359426e-14	-6.31244760901124	5.27171029136399e-10	-4.39960306787765	1.81907370742816e-05
cg13082351	`HIST2H2BF	1	Island	TSS1500	-7.65644189930036	1.91155175630542e-14	-5.98412930068879	4.04909565687554e-09	-4.88261946591993	2.20909791289211e-06
cg12701571	`ASB1	2	Island	TSS1500	-7.65359832857912	1.95432075203963e-14	-7.03298076461442	5.363081711639e-12	-3.11761874550929	0.00213731369365589
cg05013678	`KANK3	19	Island	TSS200	-7.65354926159668	1.95506694959882e-14	-6.76212474220277	3.15801935566021e-11	-3.59220823480477	0.000423601868214557
cg12463346	`PPP3CA;PPP3CA;PPP3CA	4	Island	TSS1500;TSS1500;TSS1500	-7.65300497430568	1.96336314707788e-14	-6.5127227791006	1.53514321132179e-10	-4.02819918569111	8.21945208707854e-05
cg13856647	`DNTTIP2	1	Island	TSS200	-7.6514726835689	1.98690523657938e-14	-6.66326431659027	5.94567700060367e-11	-3.76127591731753	0.000228157121611276
cg20168104	`ENTPD4;ENTPD4;ENTPD4	8	Island	TSS200;1stExon;5'UTR	-7.64971866378964	2.01419496583841e-14	-6.12574947841104	1.63887882737155e-09	-4.68932799653281	5.23703758608207e-06
cg25428854	`	3			7.64847245845956	2.03380762860596e-14	6.25888908633235	7.29212455777299e-10	4.46390960035218	1.38690359847173e-05
cg05712610	`GALNT11	7	N_Shore	TSS1500	-7.64736186176469	2.05144432746821e-14	-6.49974177853687	1.66456998127938e-10	-4.03956247831827	7.86056782958233e-05
cg25513173	`HDGFRP3	15	Island	TSS1500	-7.64657132940545	2.06408985630289e-14	-5.86471395406826	7.40541760105510e-09	-5.14772313535141	6.48994631288307e-07
cg22050330	`	6			-7.64556846526236	2.0802422776826e-14	-6.48101688490766	1.21043971868451e-10	-4.6019483905727	7.67140768193213e-06
cg26705425	`ZNF331	19	Island	TSS200	-7.64504567719447	2.088711692148e-14	-6.68677522928029	5.11866848243491e-11	-3.70710361405618	0.000278849784868051
cg23384886	`SEPW1	19	Island	Body	-7.64467104057714	2.09480183707034e-14	-7.07322779039998	4.10082243303346e-12	-3.02907056765719	0.00283452727004022
cg21164099	`HTA	16		Body	7.64447107142833	2.0980597101391e-14	7.89464331424524	1.30807340715487e-14	1.5890959848604	0.114468344684798
cg24152000	`KIF26A	14	N_Shore	Body	7.6436136129365	2.11208591754144e-14	7.04956357421336	4.80243878289049e-12	3.06840961558169	0.00250232035156867
cg23029715	`RPS19	19	Island	TSS200	-7.64299623454219	2.12224199834848e-14	-6.2126797171544	6.63608905184599e-10	-5.35185956109184	2.44863973595445e-07
cg22209751	`ZNF266;ZNF266	19	Island	TSS200;TSS200	-7.64269163611889	2.12727042652978e-14	-6.47810664572875	1.90441052237991e-10	-4.06805563307105	7.02512500426088e-05
cg17195329	`RPL23A;SNORD42B	17	S_Shore	Body;TSS200	-7.63893136760183	2.19032016542401e-14	-6.23736123071958	8.30242726288733e-10	-4.48238642125979	1.28221860181935e-05
cg09688763	`VTI1A;ZDHHC6;VTI1A	10	Island	1stExon;TSS200;5'UTR	-7.63792752895739	2.20746044860236e-14	-6.38831898321218	3.31605844769323e-10	-4.21580001470419	3.88554827995105e-05
cg17811323	`RUFY1;RUFY1;RUFY1	5	Island	Body;Body;Body	-7.63625436492343	2.23632297343401e-14	-8.2113994289738	1.24599934475159e-15	-1.01738583020917	0.311358413888389
cg13658542	`FAT1	4	Island	TSS200	-7.63615488205567	2.2380507227948e-14	-6.23545623160945	8.39815145495621e-10	-4.48012269405113	1.2946239139234e-05
cg14230379	`EFCAB4A	11	Island	TSS1500	-7.6358259084171	2.24377346382841e-14	-6.84681224773635	1.82537482435398e-11	-3.40802742341018	0.000810638799206429
cg23883409	`	8	Island		-7.63580466499136	2.2441435033719e-14	-6.83683445043072	1.94772675256601e-11	-3.42547113921461	0.000763171075693092
cg05120900	`	13			-7.63518230537936	2.25501107520678e-14	-6.57677797327058	1.02760539952925e-10	-3.87997711718193	0.000145856577339325
cg17377690	`NSMAF;NSMAF	8	Island	TSS1500;TSS200	-7.63276240741944	2.29776120919243e-14	-6.19713378128216	1.05697653822988e-09	-4.54043941120705	1.00043498053475e-05
cg17685679	`ULK4	3	Island	TSS200	-7.63138980020537	2.32236310790648e-14	-6.84696974856754	1.82350526700821e-11	-3.39880031333975	0.000836849738727412
cg02253440	`BRI3;BRI3	7	Island	Body;Body	-7.63126233057055	2.32466091246862e-14	-6.69035085303087	5.00320299101734e-11	-3.67302542230198	0.000316000249151069
cg24860752	`HIRA;MRPL40	22	Island	TSS1500;TSS200	-7.62980258862915	2.35113461516309e-14	-6.43313935383213	2.54841944214174e-10	-4.11780766142008	5.76527781369095e-05
cg01197864	`KIAA0802	18	S_Shelf	Body	7.62897927140264	2.36619676377589e-14	6.6180950259639	8.11900294066772e-11	3.83139134964178	0.000198440080661253
cg05852623	`C17orf53;C17orf53	17	Island	TSS200;TSS200	-7.62805644855038	2.38319214509079e-14	-6.97479463453285	7.8874176359142e-12	-3.16805495227195	0.00181475886800781
cg14094449	`C14orf135	14	Island	TSS200	-7.62419500176466	2.45561924955312e-14	-6.55986070091926	1.14288958716287e-10	-3.88745552778161	0.000141752176806907
cg17827660	`HOXC4;HOXC5;HOXC6	12	Island	5'UTR;Body;5'UTR	-7.6239188002683	2.46088199950945e-14	-6.32037790797092	5.02345589967723e-10	-4.30660358296228	2.67882147524852e-05
cg22475025	`PLEKHH2	2	Island	TSS200	-7.6239184747638	2.46088820822015e-14	-6.36820072163102	3.80975956872363e-10	-4.2177897468659	3.8542610164217e-05
cg09143850	`ODZ4	11	N_Shore	Body	7.62232864185412	2.49139741482224e-14	5.75396996456723	1.40502092394542e-08	5.57876024348111	1.23349450105553e-07
cg04187545	`SNORD54;RPS20;RPS20;RPS20;RPS20	8	Island	TSS1500;5'UTR;1stExon;5'UTR;1stExon	-7.61975818204357	2.54151385581024e-14	-6.14855043674574	1.41235478110024e-09	-4.59934446952021	7.75854200413884e-06
cg21535980	`ABR;ABR	17	Island	TSS200;5'UTR	-7.61799203234896	2.57652198431601e-14	-5.82368574600769	9.50430716144698e-09	-5.13953191402904	6.74499107354763e-07
cg20789464	`CCDC83	11	Island	TSS200	-7.61792432123184	2.57787353375578e-14	-6.58834888049682	9.55399251991524e-11	-3.8248757504626	0.000179762468138204
cg19433037	`NEK7	1	Island	5'UTR	-7.61787437439203	2.5788709457859e-14	-6.12955890260652	1.10930260830323e-09	-5.51129467111399	1.12264392191208e-07
cg00684757	`PQLC1;PQLC1;PQLC1	18	Island	TSS1500;TSS1500;TSS1500	-7.61763317622773	2.58369289077828e-14	-6.46509879434615	2.0645692958429e-10	-4.04029011985924	7.83810260493001e-05
cg17413194	`GNA13	17	S_Shore	TSS1500	7.61365581373116	2.66449765218841e-14	6.55792766272672	6.66791844510969e-11	4.72004020752802	4.57369440118157e-06
cg11155707	`ISM1	20	Island	TSS1500	-7.61346508711859	2.66843431926377e-14	-6.07184640257419	2.22319975708362e-09	-4.721073991172	4.55283974887581e-06
cg16791216	`CNOT7;CNOT7;VPS37A;CNOT7;VPS37A;CNOT7	8	Island	5'UTR;1stExon;TSS200;1stExon;TSS200;5'UTR	-7.61338212371673	2.67014849913666e-14	-5.57331747218064	3.944204384504e-08	-5.50298894709766	1.16965435956007e-07
cg07847925	`DCXR	17	Island	TSS200	-7.61290370108884	2.68005476241825e-14	-6.45310651686566	2.22386328993374e-10	-4.05176414424002	7.49183526207275e-05
cg14963735	`PTGER3;PTGER3;PTGER3;PTGER3;PTGER3;PTGER3;PTGER3;PTGER3;PTGER3;PTGER3	1	Island	TSS200;TSS200;TSS200;TSS200;TSS200;TSS200;TSS200;TSS200;TSS200;TSS200	-7.61266039839741	2.68510646764139e-14	-6.80894180034909	2.33406218056625e-11	-3.4276543848824	0.00075741654286612
cg25195302	`MXI1;MXI1	10	S_Shore	Body;5'UTR	-7.61233910601606	2.69179182877413e-14	-7.30482649427486	8.85491428212148e-13	-2.39292929699972	0.0183949686027769
cg21519867	`SLU7;SLU7	5	Island	1stExon;5'UTR	-7.61063988408189	2.72742193969603e-14	-6.79933659430424	2.48377540782939e-11	-3.44041103111219	0.000724596156976697
cg10061107	`DIP2B	12	Island	TSS200	-7.61048937658438	2.73060012580494e-14	-6.01228466935132	3.15163087139495e-09	-4.81945453329498	2.93723712339378e-06
cg08154944	`C15orf61	15	N_Shore	TSS1500	-7.61011385557464	2.73854569215983e-14	-6.85870508506906	1.68936619495065e-11	-3.33530342345173	0.00103984261831478
cg11308937	`GORASP1;GORASP1;TTC21A;TTC21A	3	Island	5'UTR;1stExon;TSS200;TSS200	-7.60926164664387	2.75666185072338e-14	-6.09427584765019	1.95807999056468e-09	-4.66910873621231	5.72339558353117e-06
cg02479100	`LYRM4;FARS2;LYRM4;LYRM4	6	Island	TSS1500;TSS200;TSS1500;TSS1500	-7.60891699382664	2.76402186883609e-14	-6.73602209919963	3.73503822631679e-11	-3.54789638628929	0.000496379929083245
cg10816760	`LOC153910;LOC153910	6		Body;Body	7.6073143517571	2.79850076916995e-14	6.92317106167191	5.65130196910176e-12	3.43884516623523	0.000728551952356042
cg21781706	`ACOT7;ACOT7	1		Body;Body	7.6066761587083	2.81234817694231e-14	5.94816366164098	4.57381653839777e-09	4.92413552411241	1.82917615877633e-06
cg09373136	`TCAM1	17		TSS1500	7.6065794055722	2.81445338505958e-14	6.36444394743557	3.83878549336505e-10	4.19438863098767	4.23795822966931e-05
cg25704638	`SMURF2;SMURF2	17	Island	5'UTR;1stExon	-7.60385524252075	2.87436758246079e-14	-5.54415661767564	4.41944969962228e-08	-5.6264857481883	6.32755457527331e-08
cg06836641	`	3	N_Shelf		7.60344447693016	2.88350997564605e-14	7.04145850643934	5.06886721108728e-12	3.00156174130107	0.00309043061009487
cg19719311	`	1	Island		-7.60304471205841	2.89243498539835e-14	-6.88742951244338	1.42953937188545e-11	-3.27671157501556	0.00126702166607739
cg06299143	`RBM19;RBM19;RBM19	12	Island	TSS200;TSS200;TSS200	-7.60266392479982	2.90096157067964e-14	-6.98271526154403	7.48511543315833e-12	-3.10293718500354	0.00224070808500755
cg13303459	`SH3BP4	2	Island	5'UTR	-7.60187253549815	2.91876150987738e-14	-6.13887085798283	1.49597215513831e-09	-4.58021914079298	8.42837100773345e-06
cg09678228	`TMEM117	12	Island	5'UTR	-7.60012213944428	2.95851386206945e-14	-6.53788253330361	1.31174109257357e-10	-3.87739965200356	0.000147297107518292
cg08266945	`C2orf77;C2orf77;PHOSPHO2;KLHL23	2	Island	5'UTR;1stExon;TSS200;TSS200	-7.59798458934479	3.00778138475612e-14	-6.87760615289727	1.49341188132897e-11	-3.277704204735	0.00126281562367295
cg01219670	`ZP3;ZP3	7		Body;Body	-7.59708237552578	3.0288174977593e-14	-8.18480322901102	1.522221906033e-15	-0.984956594799923	0.32699553257153
cg11690028	`SCYL3;SCYL3	1	S_Shore	TSS200;TSS200	-7.59608243284493	3.052301346078e-14	-6.35992707496487	3.94637514078507e-10	-4.18112411008599	4.47138363311936e-05
cg14842237	`MACROD1	11		Body	7.59437458683203	3.09282523763322e-14	6.07593027190992	2.19879910936414e-09	4.66492923947029	5.82922409280015e-06
cg05170494	`INSIG2	2	Island	TSS200	-7.59200605300399	3.14990300633294e-14	-7.52587851804172	1.83978142477685e-13	-2.12951165344398	0.0348477778010717
cg11696986	`	7	Island		-7.59048665091008	3.18706221826973e-14	-6.10435798988865	1.83535028214869e-09	-4.61773045002777	7.16311711850595e-06
cg03650397	`EZR;EZR;EZR	6	Island	1stExon;5'UTR;5'UTR	-7.58894582524259	3.22518559596908e-14	-6.15480609764171	1.38329051854755e-09	-4.51573943930221	1.11216653469313e-05
cg09730423	`CRYGS	3		Body	-7.58834277762475	3.24022811093077e-14	-6.68260188275598	3.22966266822198e-11	-3.86139464038388	0.000156548691623802
cg14256752	`HIF1AN	10		TSS200	-7.58793843048969	3.25035283030498e-14	-6.32576584635203	4.86135151605161e-10	-4.22456055290284	3.74958858729449e-05
cg17472072	`CLASP2	3	Island	1stExon	-7.58632343005577	3.29110314023423e-14	-6.30441496462244	5.53539086159397e-10	-4.25872031027247	3.26163534914359e-05
cg16535121	`	16	S_Shelf		-7.5854305839219	3.31384701412117e-14	-6.07500019137658	2.18789425655368e-09	-4.65689239478574	6.03804852878229e-06
cg03120361	`PLEKHA7	11	Island	Body	-7.58491470284958	3.3270586710575e-14	-6.58941263303826	9.49016271086099e-11	-3.75640538586998	0.000232331417928162
cg19562312	`ZNF239;ZNF239;ZNF239	10	Island	5'UTR;5'UTR;5'UTR	-7.58348015843265	3.36407010097055e-14	-5.88178450227106	6.70144554989653e-09	-4.99366388235842	1.33004404704143e-06
cg05590267	`ADSS	1	Island	TSS200	-7.58327707887277	3.36934219141843e-14	-6.83871837060272	1.92402493910374e-11	-3.31618046213717	0.00110944231420892
cg15940337	`FLJ43860	8	S_Shelf	Body	-7.58241720577388	3.39175529654141e-14	-6.49471000030466	1.11295846341459e-10	-4.35928867360571	2.15302218091079e-05
cg08095852	`WDR17;WDR17;WDR17;WDR17	4	Island	1stExon;5'UTR;1stExon;5'UTR	-7.58237409560097	3.39288284049235e-14	-6.4786805824639	1.89763154766793e-10	-3.94534236676996	0.000113490575251875
cg11010140	`GGNBP2	17	Island	TSS200	-7.58189995964759	3.40530818562188e-14	-7.05330966914417	4.97468635612384e-12	-2.84434621544823	0.00524693343184766
cg00586214	`MLF1IP	4	Island	TSS200	-7.58105753042067	3.42749561789451e-14	-6.01072667253844	3.18040737568021e-09	-4.76279806386829	3.78362906970649e-06
cg26566407	`SKI	1		Body	7.58095515601008	3.43020156746068e-14	5.56015321014963	4.05029975822128e-08	5.55224363974797	9.16503162680731e-08
cg01088093	`SIN3A	15	Island	TSS1500	-7.58049712874502	3.4423338448526e-14	-7.01568151357163	6.01643955231372e-12	-3.00043453134597	0.00310135568221339
cg06374766	`GPR157	1	Island	1stExon	-7.58020517083565	3.45008927094753e-14	-6.2494456851998	7.7195700823882e-10	-4.34271138532545	2.30675094102864e-05
cg16385933	`LOC282997;PDCD4;PDCD4	10	Island	TSS1500;5'UTR;5'UTR	-7.57926988408523	3.47504964183081e-14	-6.00078333991998	3.37019626953932e-09	-4.7766171694587	3.55773765771526e-06
cg20540566	`TTPA	8	Island	Body	-7.57844052122301	3.49733168169186e-14	-6.453301734745	2.22117632602532e-10	-3.98188296477479	9.85009905175174e-05
cg12414872	`RPL29	3	Island	TSS200	-7.57749839358047	3.52281380030891e-14	-7.3927558743057	4.6591985795871e-13	-2.33354239353771	0.0208995734431583
cg13679814	`PYGL;PYGL	14	Island	TSS200;TSS200	-7.57738740706476	3.52582769439601e-14	-5.81587350653516	9.75716519781051e-09	-5.09688232237272	8.23823120454851e-07
cg03947199	`RWDD2A;PGM3	6	Island	TSS200;TSS200	-7.57313102822667	3.64334494836826e-14	-6.55321922028532	1.19153252960112e-10	-3.79605928020954	0.000200343162467806
cg03615913	`PTPRS;PTPRS;PTPRS;PTPRS	19	Island	5'UTR;5'UTR;5'UTR;5'UTR	-7.57240536982949	3.66376089279831e-14	-6.23077568494205	8.63794918812565e-10	-4.35969321079642	2.14939634420126e-05
cg17173663	`	12	N_Shore		-7.57164971811703	3.68514025384321e-14	-6.32566908182858	3.26749034609387e-10	-4.8191490362694	2.94126755475521e-06
cg26762347	`PRDM16;PRDM16	1	Island	Body;Body	-7.57007864601865	3.72998344490191e-14	-6.88354204021214	8.39157784251297e-12	-3.23366949276989	0.0014624405565966
cg16400971	`ENTPD6;ENTPD6	20	Island	5'UTR;Body	-7.56947616898916	3.74732195528965e-14	-6.60469048629856	8.61823896624206e-11	-3.69847866097172	0.00028784188653625
cg08694735	`ITFG3	16		Body	7.56903627387883	3.76003160550254e-14	7.98378744633645	6.79972693702817e-15	1.28065582616851	0.202870794337239
cg13456106	`ISCA1	9	Island	Body	-7.56874814484674	3.76837932706119e-14	-5.89804862390878	6.10475882188608e-09	-4.93543427479654	1.73725065115838e-06
cg01176150	`C16orf58	16	S_Shore	TSS1500	-7.56843406600448	3.77749963241657e-14	-6.79272212407732	2.5923102746149e-11	-3.36684123881136	0.00093388121428827
cg27424244	`	19	Island		-7.56791344444915	3.79266541444354e-14	-7.04997935080806	4.78914889768119e-12	-2.9149348024438	0.00404120334193948
cg16293981	`ADORA1;ADORA1	1	Island	5'UTR;5'UTR	-7.56685651156037	3.8236384212889e-14	-6.23946367996761	8.19801942721291e-10	-4.33327070753205	2.39894325954366e-05
cg06291328	`WSB1;WSB1;WSB1;WSB1	17	Island	5'UTR;5'UTR;1stExon;1stExon	-7.56620231684046	3.84293382715235e-14	-6.92523874422522	1.09320661267532e-11	-3.13009617233663	0.00205292452412536
cg14610853	`EEF1A2	20	S_Shelf	TSS200	-7.56575556785009	3.85616563152975e-14	-5.97687163510916	3.9206995372255e-09	-4.77926579337384	3.51595538672592e-06
cg11649016	`ITGA7;ITGA7;ITGA7	12		Body;Body;Body	7.56395772952314	3.90986839587939e-14	5.93992872303411	5.21879999406751e-09	5.11332061130369	1.29354596605229e-06
cg23718418	`PHF1;PHF1;PHF1	6	N_Shore	TSS1500;TSS1500;TSS1500	-7.56206409819611	3.9672278469936e-14	-6.45179483435695	1.46148480409333e-10	-4.43433796006507	1.57172982812324e-05
cg03832227	`ASTL	2		Body	7.56160468547579	3.98126804439501e-14	6.63713933425359	7.01865161643146e-11	3.62572755235936	0.000375349627532198
cg22711777	`SPSB1	1		TSS1500	-7.56111140294162	3.9963977429656e-14	-6.53619582199297	1.34831175289108e-10	-3.801199553972	0.000196515674522133
cg26188784	`CTBS	1	Island	1stExon	-7.56080968686407	4.00567966960419e-14	-6.83701377241314	1.94545839934124e-11	-3.27383364209391	0.00127928999865535
cg01457169	`FARP1	13		Body	7.56011166959415	4.02723464833271e-14	8.28250799357644	7.27656363974415e-16	0.739125509580977	0.461777613579589
cg11189052	`WDR73	15	Island	Body	-7.55868163014621	4.07175150451663e-14	-6.68734067897493	5.10023637802207e-11	-3.53184915053866	0.000525518219288218
cg03195600	`SOCS1	16	Island	TSS1500	-7.55685606173312	4.12928481976535e-14	-7.15369131794261	2.38909913605672e-12	-2.71086313617852	0.00742284757586006
cg24181591	`EIF5A;EIF5A;EIF5A;EIF5A	17	Island	TSS1500;Body;5'UTR;TSS200	-7.5554581702052	4.17387949158239e-14	-6.08321687794288	2.08456662218733e-09	-4.5821542889668	8.35814358593406e-06
cg09978023	`RGS13;RGS13	1		5'UTR;5'UTR	7.55506980662747	4.18635266251516e-14	7.08420895501843	3.81046307183341e-12	2.82903012673588	0.0052413846061248
cg02454483	`NAP1L4	11	Island	TSS1500	-7.55248997981282	4.27014507231677e-14	-6.72382141631883	4.03905519210321e-11	-3.45542148819766	0.000687682189547001
cg21900069	`COL8A1;MIR548G;COL8A1	3		5'UTR;Body;5'UTR	7.55163807994354	4.29817519675412e-14	6.19466680269936	1.07563917562674e-09	4.37959302220972	1.97808719403149e-05
cg12031291	`TAPBP;TAPBP;RGL2;RGL2	6	Island	3'UTR;3'UTR;TSS1500;TSS1500	-7.55102300207938	4.31852554351856e-14	-7.0828811971837	3.84446756185352e-12	-2.8231915339158	0.0053336939879957
cg04863182	`STARD5	15	Island	TSS200	-7.55019566008645	4.34604831666454e-14	-6.23538385683137	8.40180940426717e-10	-4.30680289646981	2.67661809378035e-05
cg02625745	`CEBPZ;C2orf56;C2orf56;CEBPZ	2	Island	5'UTR;TSS200;TSS200;1stExon	-7.54759014067892	4.43385659819509e-14	-6.10550930860768	1.82290334960461e-09	-4.52915706728311	1.0500622115197e-05
cg02580895	`	19	Island		7.54736741567645	4.44144305508968e-14	7.18516540104219	2.17650853917239e-12	2.63203584626619	0.00941484926193289
cg01461199	`SNTB1	8	N_Shore	Body	-7.54703791793638	4.45268981829069e-14	-6.81771352686817	1.30513865120087e-11	-3.35620649564884	0.000968431394688672
cg03039196	`ZNF230	19	N_Shore	TSS200	-7.54609601753049	4.48499442304285e-14	-6.35215076422216	4.1385551897118e-10	-4.09389098148655	6.34133904002922e-05
cg01674679	`GTF3A;GTF3A	13	Island	1stExon;5'UTR	-7.54602859989429	4.48731548111142e-14	-6.15493120934789	1.36339227144727e-09	-4.43777065281218	1.54911947640489e-05
cg21839913	`LOC338799	12	Island	Body	-7.54291991794876	4.59563391691587e-14	-6.10637796282973	1.81356690889805e-09	-4.51821123477763	1.1004664273801e-05
cg21942734	`ANO1;ANO1	11		Body;Body	7.54289781080184	4.5964133476526e-14	6.8562191155846	1.71694798263611e-11	3.20403314223974	0.00161287789973621
cg09046974	`BZW1	2	Island	TSS1500	-7.5426791643171	4.60412916095235e-14	-5.98339129866198	3.72906416149657e-09	-4.73326562280753	4.31371331942718e-06
cg23255995	`MLF2;MLF2	12	Island	Body;TSS200	-7.5421967008435	4.62119989340155e-14	-6.60861578254434	8.43636908701676e-11	-3.63679902343179	0.000360583305799971
cg14337655	`C19orf35	19	S_Shelf	TSS200	-7.54116806704244	4.65780352053953e-14	-6.42953253586673	2.57284620251045e-10	-3.94833211159216	0.000112187007683039
cg03876823	`AHCY	20		TSS200	-7.5407403549978	4.67310730374292e-14	-6.79861493890445	2.49539668548015e-11	-3.30063402677792	0.00116919662219705
cg03088458	`	19	Island		-7.53971497492862	4.70999762129016e-14	-7.05827091794501	4.53153719921519e-12	-2.84350516836682	0.00501876755047738
cg26956009	`	19	S_Shore		7.53934789114121	4.72327375538742e-14	6.06269296742457	2.34612893072168e-09	4.58756377938144	8.16480562687407e-06
cg23539966	`RTN4;RTN4;RTN4;RTN4;RTN4;RTN4;RTN4	2	Island	TSS1500;1stExon;5'UTR;1stExon;5'UTR;1stExon;5'UTR	-7.5392239076012	4.72776611273072e-14	-6.25168395507715	7.61609451353097e-10	-4.25609761073578	3.29683480974835e-05
cg01966732	`	7			7.53854184487273	4.75255486152578e-14	5.41249765170357	8.98670665325931e-08	5.7254366137048	3.84146832095605e-08
cg10657320	`	3	Island		-7.53713049311103	4.80425525892579e-14	-6.71602094638821	4.2460096537708e-11	-3.43810015893655	0.000730441126078464
cg11383474	`	8	S_Shelf		-7.53672605285261	4.81917231390376e-14	-6.58740038434656	6.0551545274818e-11	-3.97557968552818	0.000100944710465487
cg14217684	`MTMR6;MTMR6	13	Island	1stExon;5'UTR	-7.53505970323309	4.88111447392027e-14	-6.38724742429489	3.39036262555176e-10	-4.00708234707399	8.92819370470392e-05
cg12748332	`MPPED2	11	Island	TSS200	-7.53478461653921	4.89141510503712e-14	-6.94740219561112	9.44933358642216e-12	-3.02785968566284	0.00284536854297019
cg07835181	`CLCN7;CLCN7	16	Island	TSS200;TSS200	-7.53286669164289	4.96382824836174e-14	-5.96711184359888	4.09859900550757e-09	-4.74199677542724	4.14995638764884e-06
cg00953443	`EIF2C2;EIF2C2	8		Body;Body	7.53157281575021	5.01327413684404e-14	8.58927663373012	6.85713824008859e-17	0.14391331074154	0.885988827692202
cg26668858	`ATIC;ATIC	2	Island	1stExon;5'UTR	-7.53120067815756	5.02758495097413e-14	-6.46808440163343	2.02668171460855e-10	-3.86065609220174	0.000156988627661852
cg06029700	`SCNN1A;SCNN1A;SCNN1A	12	Island	Body;Body;Body	-7.53076180866166	5.0445136096633e-14	-6.64560684532652	4.12718854631714e-11	-3.79337689360492	0.000202368390906595
cg10504702	`FNBP4	11	S_Shore	TSS200	-7.53029162459949	5.06271236326258e-14	-6.28389240281658	6.26903485736325e-10	-4.18162735731511	4.46230780463018e-05
cg00770964	`SGK3	8	Island	TSS1500	-7.52839957633307	5.13660000996387e-14	-6.51054941344834	1.55610379587333e-10	-3.78058206926199	0.000212298019287299
cg26249331	`RPIA	2	Island	TSS1500	-7.52804900898266	5.15040620349856e-14	-6.01352610577939	3.32157632407576e-09	-4.60663390273256	7.51698513481791e-06
cg02072231	`ALS2CR4;ALS2CR4	2	S_Shore	TSS200;TSS1500	-7.52500287564092	5.27191639179093e-14	-6.25671156563081	7.38858638405859e-10	-4.21859158882565	3.84172076821425e-05
cg01764954	`GRAMD2	15	Island	Body	-7.52284799300074	5.35957238632221e-14	-7.16302742172353	2.24320226826429e-12	-2.62588041806098	0.00946714191766701
cg18473978	`TNK2;TNK2	3	S_Shore	Body;Body	7.52259660964429	5.36989099048906e-14	7.70754703672186	5.06607285902227e-14	1.67107578630143	0.0970515610201719
cg22535921	`PDHB	3	Island	TSS200	-7.52157444745313	5.41204952732142e-14	-6.47426476340662	1.95040295868819e-10	-3.83040110657961	0.000176052213279057
cg24944109	`SLC1A2	11	N_Shore	Body	-7.52051804841999	5.45596207869273e-14	-6.95244490288887	5.20179761901755e-12	-2.89637649897187	0.00427687837888094
cg23245289	`GPR124	8	Island	Body	-7.51912765770082	5.51429235941849e-14	-7.45962172103785	2.92648722636938e-13	-2.09857751562415	0.0375443746627838
cg12881726	`GGCT;GGCT	7	Island	1stExon;5'UTR	-7.51621248973065	5.63858830487223e-14	-6.30670421673745	5.45895689201125e-10	-4.1132399615129	5.87129089601699e-05
cg03148562	`	19	Island		-7.51568944640866	5.66117927150514e-14	-6.59942256360211	9.13319288390598e-11	-3.6121308365606	0.000436445552436214
cg13758899	`ZFP3	17	Island	TSS1500	-7.51543824308285	5.67206070010693e-14	-7.26418258416331	1.12847396646154e-12	-2.43364979140235	0.0160612429612051
cg02892189	`GPR153	1	S_Shore	TSS1500	-7.5152295222916	5.6811175423286e-14	-6.57471197211133	1.06681412447448e-10	-3.66148600507944	0.000366566244665682
cg25280876	`C10orf119	10	Island	TSS200	-7.51472338733432	5.70313890586353e-14	-6.12611272917069	1.61360469342795e-09	-4.42673074378711	1.62297124188471e-05
cg05367443	`NINJ2	12	Island	Body	-7.5125292758326	5.79957667580273e-14	-7.58201793655641	1.238333388133e-13	-1.87075805985861	0.0634507626555984
cg15562780	`SLC1A2	11	Island	TSS1500	-7.51022642609756	5.90251818514194e-14	-6.78113195370247	3.07831289565536e-11	-3.26786473801986	0.00133639472187208
cg03040522	`ADAR	1	N_Shore	5'UTR	-7.50952266121468	5.93433459881927e-14	-6.48522158602568	1.82202310495057e-10	-3.78688090559291	0.000207353474603348
cg23354933	`	6			-7.50887527295989	5.96375114387586e-14	-6.67078283070116	5.66789315541852e-11	-3.46036941554846	0.000675905117582871
cg17642201	`	6	N_Shore		7.50830475733544	5.98979349155089e-14	6.91749267383214	1.15023449657813e-11	3.02684711232724	0.00285446357991437
cg17545218	`	6	Island		-7.50680930848118	6.05858808826318e-14	-6.2200402374074	9.23916100804577e-10	-4.24493268240347	3.45078819901627e-05
cg16114434	`NRP2;NRP2;NRP2;NRP2;NRP2;NRP2	2	Island	Body;Body;Body;Body;Body;Body	-7.50579646144922	6.10562233655453e-14	-6.12065238035414	1.17164888374843e-09	-5.20074148503985	5.05157432883082e-07
cg00945964	`SLC16A6;ARSG	17	Island	TSS1500;5'UTR	-7.50274614493101	6.24945101515569e-14	-7.11628527502531	3.07315042656655e-12	-2.66723725881424	0.00841633691282703
cg20423427	`RTTN	18	Island	TSS200	-7.50204362307478	6.28304536260805e-14	-6.62982875700834	7.35146538287906e-11	-3.51835868943951	0.000551248380947866
cg08034797	`SEPT9;SEPT9	17		5'UTR;Body	7.50083324760262	6.34134201332617e-14	8.12144547756716	2.44757860399421e-15	0.901784784006109	0.369406357712004
cg27269492	`SLC6A20;SLC6A20	3		Body;Body	7.5007516278973	6.34529223543767e-14	6.81772346894738	2.204955320768e-11	3.18645700954423	0.00170874759231486
cg01539269	`KLHL26	19		TSS1500	-7.49965450476941	6.39862608030729e-14	-6.11642901530505	1.20239528138068e-09	-5.1942690156303	5.20899010617194e-07
cg05803265	`YIPF1	1	N_Shelf	Body	7.49926841723255	6.41749937670637e-14	5.38018035782582	1.06731161606187e-07	5.70282919678501	4.30769539407324e-08
cg03992107	`	1	S_Shore		7.49841332656116	6.45949421251172e-14	6.82180818274777	2.14731589166913e-11	3.17458017449776	0.00177649038344999
cg04158730	`EXO1;EXO1;EXO1	1	Island	TSS1500;TSS200;TSS1500	-7.49713689154739	6.52268502708029e-14	-6.78082258095121	2.79940236364048e-11	-3.24383389400108	0.0014139193349976
cg03610460	`GFER	16	Island	TSS200	-7.49591243573397	6.58387350439185e-14	-6.92508584101132	1.09430498232329e-11	-2.98853475806181	0.00321887303055555
cg17283117	`HES6;HES6;HES6;HES6	2	Island	5'UTR;1stExon;5'UTR;1stExon	-7.49332768930701	6.71489714572991e-14	-5.88192203376956	6.69616918657718e-09	-4.81151517131258	3.0437340028323e-06
cg24470880	`	13			7.49318305811323	6.72230391006197e-14	6.85605454689847	1.71878938629685e-11	3.10400821636865	0.00223301204579546
cg05684300	`PPP3CA;PPP3CA;PPP3CA	4	N_Shore	Body;Body;Body	-7.49183537097427	6.79170807295308e-14	-5.83294349093035	8.85561473255078e-09	-4.89434130831715	2.09471734753344e-06
cg18886062	`MAMSTR;RASIP1	19	S_Shore	TSS1500;Body	-7.48731819419421	7.02951373428758e-14	-6.94795813395361	9.6159108004772e-12	-2.94041989151933	0.00373689489172161
cg03129653	`C11orf58;C11orf58	11	Island	TSS200;TSS200	-7.48558845288603	7.12272671532524e-14	-6.985990389906	7.32471872321674e-12	-2.86096503504841	0.00476171953458171
cg04851935	`PLA2G7;PLA2G7	6	Island	TSS200;5'UTR	-7.48525767629839	7.14068962177578e-14	-5.98496978968068	3.69501258769214e-09	-4.61463541712558	7.26017052946039e-06
cg10797959	`ZFYVE28	4	Island	TSS200	-7.48461243740627	7.1758577366888e-14	-6.33339939485221	4.65420408125962e-10	-4.00201802590214	9.10661276698079e-05
cg11577196	`	3			7.48444868758969	7.18480981407627e-14	6.26768123176547	7.08015946682146e-10	4.21557410643801	4.60736204397845e-05
cg22696252	`	3	Island		-7.48414675573331	7.20134499084281e-14	-8.18355934413418	1.54808075032838e-15	-0.766133239296638	0.445597073993402
cg05396182	`MTF2;MTF2;MTF2;MTF2	1	Island	TSS200;TSS200;TSS200;TSS200	-7.48311757088534	7.25798945588147e-14	-6.33947914457998	4.47150176464806e-10	-3.98902208575561	9.58011684758473e-05
cg18458026	`C19orf28;C19orf28;C19orf28;C19orf28;C19orf28;C19orf28	19	Island	1stExon;1stExon;5'UTR;5'UTR;1stExon;5'UTR	-7.4826868092453	7.28182760973582e-14	-6.39435489442473	3.19535286152176e-10	-3.89198045483858	0.000139322198074594
cg05744184	`STAT5A	17	N_Shore	3'UTR	-7.48162192457897	7.34108864789856e-14	-7.34030814451637	3.36467775386772e-13	-1.68552109764884	0.0942161370276848
cg01911237	`ST3GAL1;ST3GAL1	8	Island	5'UTR;5'UTR	-7.47919311558662	7.47803183329545e-14	-5.89714942138169	6.48773372420535e-09	-4.70517418165628	4.88397263155455e-06
cg03734784	`ZNF530	19	Island	Body	-7.4791548327949	7.48021030482628e-14	-6.8288647267998	2.05120470253769e-11	-3.123353866632	0.00209813491159434
cg05280148	`MAPK3;MAPK3;MAPK3	16	S_Shore	TSS1500;TSS1500;TSS1500	-7.47602402802714	7.66049560874856e-14	-5.95714148202849	3.15633804902542e-09	-5.57321813753955	8.25711441835767e-08
cg23647989	`	1			7.47596126087028	7.66415334200284e-14	7.84931236439839	1.82030158262795e-14	1.32852529311041	0.186563297886904
cg17854747	`RNF138;RNF138	18	Island	5'UTR;TSS200	-7.4754408122709	7.69454850325588e-14	-5.71185701950244	1.75235401759767e-08	-5.07347072060181	9.18942415652677e-07
cg14375499	`ALOX12	17	Island	TSS200	-7.47473362287562	7.73603964176444e-14	-7.12162790993798	2.96479340119882e-12	-2.60135097416893	0.0101447056607717
cg04121624	`RHOBTB1;RHOBTB1	10	N_Shore	Body;TSS200	-7.4728216843017	7.84931818665287e-14	-6.40075339268941	3.0815795329583e-10	-3.86050231943558	0.000157080373811574
cg14330655	`TET2;TET2	4	Island	TSS1500;TSS1500	-7.47235305603809	7.87733133570497e-14	-6.7041821395847	4.58012077925914e-11	-3.32814175422503	0.00106541726461981
cg00776770	`ZNF213;ZNF213	16	N_Shelf	Body;Body	7.47035541771035	7.99785036317815e-14	7.96155778513586	8.00912402155755e-15	1.12049832714625	0.264986591855311
cg10196802	`GGCT	7	Island	TSS200	-7.47013768895484	8.01109513694644e-14	-6.88842309664355	1.3914954039408e-11	-3.00078029975473	0.00309800068234541
cg21533727	`CDK5;CDK5;SLC4A2	7	Island	TSS1500;TSS1500;TSS1500	-7.46913714803209	8.07223728379598e-14	-6.64177950281317	6.81511811879705e-11	-3.43101645428173	0.000748634209305623
cg17081801	`CLTC	17	Island	TSS1500	-7.46774963518449	8.15778666974523e-14	-6.73158888672402	3.84281601717485e-11	-3.27082140053475	0.0012922491076778
cg24137987	`KDM3B	5	Island	TSS200	-7.4652449550327	8.31447902677551e-14	-5.98676654596161	3.6566216696221e-09	-4.5711052821682	8.76682400043064e-06
cg08610415	`ZNF573	19	N_Shore	TSS200	-7.46516397816614	8.31959398553662e-14	-7.17013463731557	2.13804248166414e-12	-2.49703112988435	0.0135374163977932
cg00001593	`	1			7.46285504776435	8.46674766590118e-14	5.69446886150882	2.07025593037272e-08	5.39847218246448	3.66786517966334e-07
cg04055107	`MUS81;CFL1	11	Island	TSS1500;TSS1500	-7.46190812794394	8.52783421246275e-14	-5.57707196101338	3.69250486937013e-08	-5.28238220770543	3.42226662961798e-07
cg12673453	`SCN4B;SCN4B;SCN4B;SCN4B	11	Island	TSS200;Body;Body;TSS200	-7.4614042048261	8.56051909255922e-14	-5.99720603745965	3.44114383294211e-09	-4.54505977831345	9.80769504396473e-06
cg00008004	`	1	Island		-7.45935544763782	8.69467589619673e-14	-6.32206714603953	4.97207178801785e-10	-3.97159077668773	0.000102520831958409
cg11403890	`SCMH1	1	Island	TSS1500	-7.45923512826685	8.70261858008306e-14	-5.91290031758469	5.60535098907346e-09	-4.68843298194335	5.25769668455068e-06
cg25784220	`ZSCAN18;ZSCAN18;ZSCAN18;ZSCAN18;ZSCAN18;ZSCAN18;ZSCAN18	19	Island	1stExon;Body;5'UTR;1stExon;1stExon;5'UTR;5'UTR	-7.45701291947388	8.85060283225405e-14	-6.35372728053488	4.09886814110402e-10	-3.91137813236104	0.000129345986033708
cg26108121	`PGM1	1	Island	Body	-7.45687725204692	8.85971705567929e-14	-6.48829007167809	1.78757838623752e-10	-3.67527647850181	0.000313408924884972
cg19121473	`FGFRL1;FGFRL1;FGFRL1	4	Island	TSS1500;TSS1500;TSS1500	-7.45567159252903	8.94112035958789e-14	-6.1206763680928	1.66643114797007e-09	-4.31710481390607	2.56506553578451e-05
cg26153578	`RCAN1;RCAN1	21	S_Shore	TSS1500;TSS1500	-7.45543663823331	8.95706929722341e-14	-6.22707558567392	8.83224080749362e-10	-4.13016086846972	5.48763767012147e-05
cg16003238	`IGDCC3	15	S_Shore	TSS1500	7.45489868022899	8.9936918194683e-14	6.83291779025766	1.05195888266018e-11	3.20299401865986	0.00161840418488159
cg09920549	`MXD4	4	Island	TSS1500	-7.45471991310426	9.00589428345856e-14	-6.10474547753572	1.83115190642212e-09	-4.34310420490238	2.3029894255927e-05
cg25253948	`	15			7.45437936581603	9.02918474183923e-14	6.96953869833706	8.20037768852331e-12	2.82885184097255	0.00524418168701336
cg13693260	`DPYD;DPYD	1	Island	TSS200;TSS200	-7.45265399044758	9.14809819120984e-14	-6.49220513070273	1.74455525303922e-10	-3.65989354020063	0.000331524324110716
cg25493948	`FMN1	15		Body	-7.45259449430578	9.1522260222456e-14	-5.78180376837101	1.18316869973976e-08	-4.9047868036821	1.99763435957585e-06
cg14986359	`MZF1;MZF1;LOC100131691	19	Island	TSS200;TSS200;Body	-7.4524732787956	9.16064159657349e-14	-6.91016694556532	1.24270591547184e-11	-2.83473464087378	0.00539778707358563
cg03508643	`TFG;TFG;TFG	3	Island	1stExon;5'UTR;5'UTR	-7.45105225349983	9.259867492323e-14	-6.11183170648695	1.77947987210792e-09	-4.31610146405386	2.57573127073912e-05
cg07614783	`ZNF546	19	Island	TSS200	-7.45071623731024	9.28348447952158e-14	-5.91203083622676	5.63345688242772e-09	-4.67276755892811	5.6322732807081e-06
cg26202358	`FARP2;FARP2	2	Island	5'UTR;1stExon	-7.44989111418082	9.3417299546421e-14	-6.17779918084737	1.18648158499444e-09	-4.20533055340396	4.0542137269938e-05
cg17707966	`ZNF623;ZNF623	8	Island	5'UTR;1stExon	-7.44798717135808	9.47750343459458e-14	-6.14740824640974	1.42197885456553e-09	-4.25475042595525	3.31505647352455e-05
cg17015853	`AP1AR;AP1AR	4	Island	Body;Body	-7.44789069406424	9.48443478877422e-14	-5.83613688006813	8.69621440520764e-09	-4.80007412896927	3.20378638607855e-06
cg02192300	`	6	Island		-7.44699859478409	9.54876362775911e-14	-5.3037937229621	1.59702169188559e-07	-5.73123162537879	3.73012642692465e-08
cg08161617	`HSPA2	14	N_Shore	TSS1500	-7.44679013704035	9.56385711395687e-14	-6.38536680998774	3.37670952909403e-10	-3.8353009946808	0.000172822742503293
cg21490846	`CACNA2D4	12	Island	Body	-7.4455419938793	9.65472129920888e-14	-7.2902151917117	9.44386394174751e-13	-2.2469912439822	0.0260697819030527
cg12637942	`NEAT1	11	Island	TSS200	-7.44499262372395	9.69498358341431e-14	-7.11118609009659	3.4009125851665e-12	-2.4228876127365	0.0170088427609991
cg24423860	`SPRYD3	12	Island	TSS200	-7.44480077446059	9.70908268813975e-14	-6.37504882909508	3.59733648896731e-10	-3.84936967116509	0.00016385919968034
cg25355972	`NDUFV3;NDUFV3;NDUFV3;NDUFV3	21	Island	5'UTR;1stExon;1stExon;5'UTR	-7.44474348331873	9.71329695091673e-14	-6.10698547952907	1.80706498633191e-09	-4.31904826947128	2.54452656663728e-05
cg18403551	`SPSB4	3	Island	TSS1500	-7.44340374753339	9.81236038985036e-14	-5.75401511751526	1.38364518891963e-08	-4.93494289268978	1.74115379050662e-06
cg05993306	`HNRNPA0	5	Island	TSS1500	-7.4431994096404	9.82755666788664e-14	-5.78739032423578	1.14642837561677e-08	-4.87603889353002	2.27593353127327e-06
cg13576294	`	9			-7.441303932706	9.96962719581208e-14	-5.9989501139008	2.45552837627745e-09	-5.35118200271059	2.45668372961663e-07
cg12892303	`C17orf104	17	Island	TSS200	-7.44106403985263	9.98775102534585e-14	-6.12406217120561	1.63333548457546e-09	-4.2816962272067	2.96827218885231e-05
cg02687067	`GALNT10;GALNT10	5	Island	Body;Body	-7.4407380900617	1.00124283288739e-13	-6.56847044948356	1.08271775293779e-10	-3.50219117637973	0.000583641044361698
cg09800026	`ICOSLG	21	Island	TSS1500	-7.44067617020608	1.00171229822343e-13	-6.0668710988082	2.28921547385277e-09	-4.38114375842275	1.96530217903924e-05
cg19563365	`	11	N_Shelf		7.43956414335163	1.01018041402616e-13	6.2840723412749	6.262206813124e-10	3.99824407910409	9.24177119524087e-05
cg21655307	`	3	Island		-7.43831571348941	1.01977109032067e-13	-6.44267504567741	2.37216438472015e-10	-3.71776598766232	0.000268099835289566
cg01058931	`ZKSCAN2	16	Island	TSS1500	-7.43708254129948	1.029332393264e-13	-6.5489423255798	1.22392454840925e-10	-3.5290390872612	0.000530783033677925
cg13515783	`DNAJB6	7	N_Shore	Body	7.43705825275817	1.02952159455895e-13	7.14933243315269	2.46037206668337e-12	2.47677689741153	0.0143026327938183
cg22562194	`TTYH2;MGC16275	17	N_Shore	TSS200;TSS200	-7.43596820324844	1.03804807073383e-13	-6.07161495846399	2.2262290652874e-09	-4.3633302783983	2.11705941878727e-05
cg02145593	`NCKIPSD;NCKIPSD;NCKIPSD;NCKIPSD	3	Island	1stExon;5'UTR;5'UTR;1stExon	-7.4357382444423	1.03985567670656e-13	-6.14101923679647	1.47700560077684e-09	-4.24123186259547	3.50331913495013e-05
cg12558040	`FAM98C	19	Island	TSS200	-7.43483423168265	1.04699176080088e-13	-6.22807283973032	8.77945862231542e-10	-4.08684204639731	6.52133120724184e-05
cg00117463	`C6orf97;C6orf97	6	Island	5'UTR;1stExon	-7.43405799005603	1.0531576372903e-13	-6.87965098031165	1.47359984595634e-11	-2.94335303761537	0.00370325166668422
cg14168295	`NFASC;NFASC;NFASC;NFASC;NFASC;NFASC	1		5'UTR;5'UTR;5'UTR;5'UTR;TSS1500;5'UTR	7.43336873265495	1.05866248039731e-13	5.69501240311305	2.02690716608539e-08	5.02361658746574	1.27939338863982e-06
cg06178669	`	11			-7.43327467093821	1.05941590597397e-13	-6.52586342174708	9.0505350631483e-11	-3.83946028459743	0.00017012550456051
cg05203814	`CDH15	16	N_Shore	TSS1500	-7.42903194808001	1.09395324453643e-13	-7.55737470223012	1.47378982247086e-13	-1.74546745793389	0.0831565274706741
cg06857900	`WDR66	12		Body	7.42898517844734	1.09434006662298e-13	6.62736658299893	7.46700032580102e-11	3.37525803884935	0.00090735579496239
cg17498841	`B3GALNT2	1	Island	TSS200	-7.4266732875052	1.11362972549926e-13	-5.79967499712099	1.06950305966713e-08	-4.82116335256267	2.91479082910275e-06
cg00622654	`DOCK1	10	Island	TSS1500	-7.42531330396576	1.12513267419867e-13	-5.81287604965	1.00349317531691e-08	-4.78242995183745	3.46666141116812e-06
cg16876219	`	3	N_Shelf		7.42258067753821	1.14859979767519e-13	6.73595860096259	3.83763861304795e-11	3.12214840319447	0.00224381560744224
cg14039343	`TAPBP;TAPBP;RGL2;RGL2	6	S_Shore	3'UTR;3'UTR;TSS1500;TSS1500	-7.42233996443942	1.15068988712177e-13	-7.10489091856165	3.317412892946e-12	-2.52496459640232	0.0125418934651647
cg10538030	`PHF12;PHF12	17	Island	Body;Body	-7.42171693170471	1.15611699499031e-13	-6.4922650747145	1.74390446603875e-10	-3.59736436491537	0.000415817794501015
cg15593809	`CLNS1A	11	Island	TSS200	-7.42074681511965	1.16461759451515e-13	-6.09987559268952	1.88460501708266e-09	-4.28308874348375	2.95132892184439e-05
cg01005211	`	3			-7.42052465714583	1.16657286990298e-13	-6.07683184497644	2.15891513109153e-09	-4.32302577876803	2.50298120634563e-05
cg26554646	`GINS4	8	Island	TSS200	-7.41977909298206	1.17315840178342e-13	-5.57414829598032	3.75205734816128e-08	-5.20249902913954	5.00963315381775e-07
cg01444765	`C21orf33;C21orf33	21	Island	TSS200;TSS200	-7.41764791675724	1.19218511773949e-13	-5.95498280647339	4.39690895664799e-09	-4.53076758546834	1.04283595756001e-05
cg00901051	`	1	Island		-7.41695561932479	1.19843081991851e-13	-6.94702286988403	9.47296601467515e-12	-2.7907716992955	0.00587369691829339
cg18278828	`RPL37A	2	Island	Body	-7.41689519145491	1.19897750561947e-13	-6.49733810397101	1.68968163395843e-10	-3.57874442972202	0.000444578885173783
cg19822502	`KLHL32	6		Body	7.41558421280097	1.21089833199428e-13	6.8900674625271	1.37661237897942e-11	2.88782165674347	0.00438968916951991
cg07356130	`CTR9	11	Island	TSS1500	-7.41496427218115	1.21657598585727e-13	-5.68631514105104	2.02054591869715e-08	-4.99620587850876	1.31455799358019e-06
cg01045986	`RNF138;RNF138	18	Island	TSS1500;TSS200	-7.41364405790339	1.22875433488252e-13	-6.62972311670201	7.5441044291385e-11	-3.31852702857577	0.00118881351078206
cg14917136	`	4	N_Shelf		-7.41244051405127	1.23996079670654e-13	-5.97515420299047	4.15930979397874e-09	-4.48827300737382	1.33862611359554e-05
cg11212312	`IL3	5		TSS1500	7.41124139300174	1.25122594521715e-13	6.35816166133877	3.98922353886509e-10	3.811249877018	0.000189231165643
cg03946955	`LMNA;LMNA;LMNA	1		Body;Body;Body	-7.41083316500026	1.25508394563133e-13	-6.76043814112023	1.7232011030016e-11	-3.29462936168978	0.00119306781401608
cg06646494	`KDM2B;KDM2B	12	Island	Body;Body	7.41053653537789	1.25789460497697e-13	6.7446296751634	3.53417481618546e-11	3.13252343626971	0.00203687014742954
cg02399900	`	10	S_Shore		7.41039824663629	1.25920704756677e-13	6.76609091736872	3.0783676014523e-11	3.09463251819125	0.00230121832593178
cg08641866	`TNFRSF18;TNFRSF18;TNFRSF18	1	Island	1stExon;1stExon;1stExon	-7.40849884591487	1.27737024640759e-13	-7.74582261465257	3.84851728316272e-14	-1.37377198216728	0.172065659823117
cg24609255	`RFC5;RFC5;RFC5;RFC5	12	Island	5'UTR;5'UTR;Body;5'UTR	-7.40755025373579	1.28653739877989e-13	-6.70785093180312	4.47391560620556e-11	-3.19095433841055	0.00168372646599218
cg26488814	`PHRF1	11	N_Shore	Body	7.40687519185844	1.29310051022753e-13	7.38914351380964	4.77727267162175e-13	1.99559346844201	0.0478466181399013
cg18855466	`SPATS2L;SPATS2L;SPATS2L;SPATS2L;SPATS2L	2	Island	1stExon;5'UTR;5'UTR;5'UTR;5'UTR	-7.40594654022708	1.30218287166926e-13	-6.01431670388468	3.21274447723295e-09	-4.54075242592567	1.24119262411794e-05
cg12612947	`TOP2B	3	Island	TSS1500	-7.40563425606701	1.30525112247225e-13	-6.34238069222831	4.39302412225841e-10	-3.82759284297176	0.00017792879336856
cg20237610	`LAMA2;LAMA2	6		TSS1500;TSS1500	7.40484829975439	1.31300476688737e-13	6.4867565690485	1.06314371488249e-10	4.21612579764201	3.88040898481028e-05
cg00030423	`UQCRFS1	19	Island	TSS200	-7.40459580378548	1.31550529179325e-13	-6.06751886286983	2.2805133450721e-09	-4.30720634586604	2.67216333116161e-05
cg01396567	`MCOLN3	1	Island	TSS200	-7.403123142334	1.33018290535395e-13	-6.81658222940915	2.22132889900566e-11	-2.99146446516145	0.00318956712522243
cg26304213	`TLE3;TLE3;TLE3	15	Island	TSS1500;TSS1500;TSS1500	-7.40084252808269	1.35323130603106e-13	-6.67106190132505	5.65783117396678e-11	-3.24189422090333	0.00142306163707281
cg10253929	`LTBP4;LTBP4;LTBP4	19	Island	TSS1500;Body;Body	-7.40067907113192	1.35489822849145e-13	-6.05004357608881	2.52698778547796e-09	-4.3299295476215	2.43240903844344e-05
cg26580761	`MAD1L1;MAD1L1;MAD1L1	7	N_Shore	Body;Body;Body	7.40032356568662	1.35853061744227e-13	7.57228662120487	1.32652087936769e-13	1.66140644073797	0.0989876398409807
cg17415581	`CSNK1D;CSNK1D	17	Island	TSS200;TSS200	-7.39752842256994	1.38742544865358e-13	-6.10945523765255	1.78086609682883e-09	-4.21945038007431	3.8283331321088e-05
cg27176796	`ATP2C2	16		Body	7.39751360633839	1.38758020928089e-13	5.72627043298433	1.61665446423521e-08	4.89097069319677	2.12700721393092e-06
cg18053085	`PLCD3;ACBD4	17	Island	TSS1500;5'UTR	-7.39716327861954	1.39124444907872e-13	-6.06384999716674	2.33023131367316e-09	-4.29863902667475	2.76830386832226e-05
cg19452316	`RASSF5;RASSF5	1	Island	1stExon;1stExon	-7.39602249047858	1.40324249736855e-13	-5.59700257782187	3.34243736219959e-08	-5.09775214607569	8.20479716629474e-07
cg03446526	`FLOT1	6	Island	TSS200	-7.395138844478	1.41260592244236e-13	-6.39534828865695	3.17590352280886e-10	-3.71358711420145	0.000272265556812648
cg17954603	`MLF1IP	4	Island	TSS200	-7.39319059849085	1.43346766234565e-13	-6.25860746955562	7.30453020654993e-10	-3.94930099423095	0.000111767622863951
cg01369646	`MYB;MYB;MYB;MYB;MYB;MYB;MYB;MYB	6	Island	Body;Body;Body;Body;Body;Body;Body;Body	-7.3922420055764	1.44373444985491e-13	-6.34878925401098	4.28932264596738e-10	-3.78805845665848	0.000206441274767999
cg00685795	`COASY;COASY;COASY;COASY;COASY	17	N_Shore	TSS1500;TSS1500;TSS1500;TSS1500;TSS1500	7.39192529168681	1.44717836269031e-13	6.23286633089219	5.40349868130094e-10	5.04453949462922	1.05126653827284e-06
cg16365445	`ITGB1;ITGB1	10		5'UTR;5'UTR	7.39190419858668	1.44740801329339e-13	6.64441487020687	3.75965626666265e-11	3.62553356865895	0.000375613353362755
cg23948730	`PAFAH1B1	17	Island	TSS1500	-7.39160762753289	1.4506407170591e-13	-6.28520041571161	6.21956569130419e-10	-3.89950146450782	0.000135370468039168
cg21273027	`TRIM26	6	Island	TSS1500	-7.39137404563693	1.45319181556581e-13	-5.9779138898871	3.84961515516389e-09	-4.43756489193852	1.5504659311923e-05
cg21149286	`GNS;GNS	12	Island	5'UTR;1stExon	-7.39098645624385	1.45743465904373e-13	-6.48562841792932	1.81741918782212e-10	-3.54698815098481	0.000497987731879013
cg16257254	`ARL5A;ARL5A;ARL5A	2	Island	TSS200;TSS200;TSS200	-7.38993185226827	1.46904085864266e-13	-5.79002908537708	1.12946313397052e-08	-4.76393222273277	3.76458007661569e-06
cg02291533	`LRFN3	19	Island	TSS1500	-7.38960943510455	1.47260723827599e-13	-6.52303417774695	1.43940610776734e-10	-3.47865419476043	0.000634002113093073
cg00760847	`MYL12B;MYL12B;MYL12B;MYL12B	18	Island	5'UTR;5'UTR;TSS200;TSS200	-7.38819306362172	1.48837530509238e-13	-6.19974200075727	1.04060013681803e-09	-4.04238170579852	7.77386683496067e-05
cg11267810	`	20			7.3876170263784	1.49483551724542e-13	6.31076668468856	3.30217282075925e-10	4.76067763103902	3.8194931137808e-06
cg20556744	`IAH1	2	Island	TSS200	-7.3870174204842	1.50158931580677e-13	-6.83796016583531	1.93352976924005e-11	-2.92150080728009	0.0039607060408153
cg26094983	`HELZ	17	Island	TSS1500	-7.38657503849878	1.50659139905504e-13	-5.92792236979717	5.140809754235e-09	-4.51549415703107	1.11333406570175e-05
cg25749212	`BRD2;BRD2;BRD2	6	N_Shore	5'UTR;1stExon;5'UTR	-7.38597829099653	1.51336486537354e-13	-6.33111232897206	4.70555637782339e-10	-3.8076798271813	0.000191788975634934
cg27286993	`CCDC64B	16	Island	Body	-7.3841647629436	1.53413374329556e-13	-7.47169891327272	2.68974215760715e-13	-1.80508646542005	0.0732317166037789
cg23223044	`RPL13AP5;RPL13A;RPL13A	19	Island	Body;5'UTR;1stExon	-7.38233251007937	1.55540142033873e-13	-7.35470209081017	6.06163087230304e-13	-2.00643206903713	0.0466601524509304
cg18688254	`GMPR2;GMPR2;GMPR2;GMPR2;GMPR2;NEDD8;GMPR2	14	Island	1stExon;5'UTR;TSS1500;5'UTR;TSS1500;TSS200;1stExon	-7.38215933806786	1.557426416063e-13	-6.51731146637208	1.49179271410568e-10	-3.4736508849473	0.000645219574704069
cg18124063	`GPR161	1	S_Shore	TSS1500	-7.38147357297964	1.56547091636796e-13	-6.10215742685475	1.86419926500588e-09	-4.19859145691935	4.16645948288361e-05
cg23763424	`DLX2	2	Island	TSS1500	-7.38111200968048	1.56972872814364e-13	-6.81927144558391	2.18293533413012e-11	-2.94233789957551	0.00371486380174985
cg27266257	`ASB13;ASB13	10	N_Shore	Body;Body	-7.38093869854124	1.57177369274003e-13	-6.30972947006793	3.613492480698e-10	-4.29292829820755	2.8342186022604e-05
cg06717289	`CSPG4	15	N_Shore	Body	-7.38078921459392	1.57353961356051e-13	-6.48447040934934	1.83055383329172e-10	-3.52844184679223	0.000531908357965794
ch.12.129703717R	`	12			-7.38040861135206	1.57804465556751e-13	-5.91572570004052	7.12389959414616e-09	-4.41771756234475	1.68575960690492e-05
cg21752471	`PHF15	5	Island	TSS200	-7.38008868789888	1.58184125772838e-13	-7.0053284523709	6.44421050354431e-12	-2.61419901160936	0.00978457068586164
cg27269921	`MN1;MN1	22	Island	5'UTR;1stExon	-7.37957451066285	1.5879619240859e-13	-5.81965723437118	9.65668645996665e-09	-4.67920700875904	5.47528571839268e-06
cg12510708	`NFE2L3	7	S_Shore	Body	7.3774967189121	1.61293345048856e-13	6.48404215545025	1.08212790704571e-10	4.12734964695087	5.54967605089066e-05
cg19902697	`TSKU	11	N_Shore	TSS200	-7.37580973667661	1.63349157141751e-13	-6.90279994786165	1.26654135167436e-11	-2.78525128226503	0.00597044467831862
cg04664999	`	19	Island		-7.37517565989044	1.64128502628235e-13	-5.91832018850775	5.44583417474108e-09	-4.50733964001859	1.15282689698404e-05
cg19033308	`ID1;ID1	20	Island	TSS200;TSS200	-7.37425988746272	1.65260533353146e-13	-6.04435459520585	2.6126989160759e-09	-4.28659171535906	2.90911532573975e-05
cg14572758	`LASP1;LASP1	17	Island	1stExon;5'UTR	-7.37362129756492	1.66054461689041e-13	-6.0391071732692	2.72874404478553e-09	-4.28720213867392	2.90181862429603e-05
cg08119082	`PANX2;PANX2;PANX2	22	Island	TSS1500;TSS1500;TSS1500	-7.3710184957165	1.69329347470108e-13	-5.98595874058126	3.6738334837818e-09	-4.3823929121811	1.95506122165681e-05
cg23791764	`MAPRE2;MAPRE2	18	Island	TSS200;TSS1500	-7.37086901752817	1.6951933802617e-13	-5.89150276534249	6.33840583753174e-09	-4.54763003877989	9.69991323527691e-06
cg07606381	`SLC35B3;SLC35B3;SLC35B3	6	Island	TSS200;TSS200;TSS200	-7.36955038713424	1.71204449495802e-13	-6.35070533274317	4.17527253331246e-10	-3.74019425971409	0.000246751143712525
cg16431369	`THAP3;DNAJC11	1		3'UTR;3'UTR	7.36855758159391	1.72484031129159e-13	6.80028917683179	2.81789051398414e-11	2.85840496562266	0.00519574739625989
cg04221910	`CEP72	5	S_Shelf	Body	7.36798122205327	1.7323118054059e-13	7.29293388861163	9.2695691346396e-13	2.08572616506859	0.0387161709144319
cg04645034	`RPS23;RPS23	5	Island	1stExon;5'UTR	-7.36696578272074	1.74555264020662e-13	-6.67557537611126	5.49750763752069e-11	-3.16562837862209	0.00182918360188747
cg02033582	`	17			-7.36632028216884	1.75402129591231e-13	-6.58003649100315	6.37166811425037e-11	-3.48137770704594	0.000627973037618361
cg16487852	`HSBP1	16	Island	TSS200	-7.36611914748531	1.75666832516514e-13	-6.41260360727391	2.8559793709039e-10	-3.62479101013299	0.000376624493639396
cg21909475	`C1orf156;C1orf112	1	S_Shore	TSS1500;TSS200	-7.36544165502879	1.76561335949122e-13	-5.3077547844291	1.56418378795101e-07	-5.55972586124094	8.83050894846281e-08
cg08366277	`NCEH1;NCEH1;NCEH1;NCEH1	3	S_Shore	TSS200;TSS200;TSS200;TSS200	-7.36048107611217	1.83248612762574e-13	-5.85528078686049	7.79763848157472e-09	-4.59015027590065	8.07389121375087e-06
cg02721516	`SEC22A	3	Island	5'UTR	-7.35916772321847	1.85060391907847e-13	-6.2449813032862	8.04476246616895e-10	-3.90171053682754	0.000134230122638488
cg26116741	`LOC96610	22		Body	-7.35800726391344	1.86675890564342e-13	-6.07252988036851	2.21427737651518e-09	-4.20441895459762	4.06922642653415e-05
cg24163616	`LOXL4;LOXL4	10	N_Shore	1stExon;5'UTR	-7.35546549757584	1.9026289782618e-13	-6.54822478014908	1.26392669799098e-10	-3.35232731292236	0.00106265113910884
cg23057721	`	17	Island		-7.35532223519011	1.90467077050368e-13	-6.22563426373424	8.93395099800769e-10	-3.93002112894894	0.000120399742386968
cg04579263	`RPS6KA5;RPS6KA5	14	N_Shore	Body;Body	-7.35324315680476	1.93454547570764e-13	-6.09286777735135	1.38892177475461e-09	-4.82225485869866	2.9005401208905e-06
cg08460793	`TXNDC11	16	Island	1stExon	-7.35323340289816	1.93468671084429e-13	-5.90177422122979	5.97555002197984e-09	-4.49404404989017	1.22012171990758e-05
cg00093900	`PPP1R15B	1	Island	TSS200	-7.3530803339331	1.93690445433924e-13	-6.51051516092407	1.58264508236305e-10	-3.42961762569824	0.000752276568750408
cg02065151	`OAT	10	Island	TSS200	-7.35167821561477	1.95733564893909e-13	-6.2024466200233	1.02388039325754e-09	-3.96396286593163	0.000105600179898962
cg23674796	`RWDD3;RWDD3	1	N_Shore	TSS200;TSS200	-7.34926906522595	1.99293653264944e-13	-6.29460202586945	5.87505770692062e-10	-3.79759485551895	0.000199192434965211
cg10313167	`FCRL5	1		3'UTR	7.34901558597909	1.9967190706441e-13	7.92705319609108	1.03186386512185e-14	0.936132457372712	0.351490471475204
cg24733637	`HOMER3;HOMER3;HOMER3;HOMER3;HOMER3	19	N_Shore	5'UTR;5'UTR;TSS1500;5'UTR;TSS200	7.34547629328043	2.0502766843119e-13	6.5561217296204	1.17002968305375e-10	3.33161574512712	0.00105293916081573
cg06873684	`HDGF2;HDGF2	19	N_Shore	TSS200;TSS200	-7.34312643746433	2.08661234818855e-13	-7.33838918037356	6.78314551274861e-13	-1.95591209079742	0.052410586718681
cg25040783	`APPL1	3	N_Shore	TSS1500	-7.34004120029787	2.13528113435082e-13	-6.04604131103194	2.58699490246328e-09	-4.21458994443882	3.90469441819945e-05
cg06035616	`LOC652276	16	Island	TSS200	-7.33925140843306	2.14791810205737e-13	-6.81154958714695	2.29496764206757e-11	-2.87140543052495	0.00461380637398438
cg20375721	`	2	S_Shelf		7.33745616183527	2.17691666307205e-13	6.52899222287384	1.38678028340323e-10	3.36297869368033	0.000946294640400566
cg08355353	`MOV10;MOV10	1	Island	Body;Body	-7.33699234188421	2.18447103629403e-13	-5.84805298995086	8.12572418842582e-09	-4.55542229116493	9.38006999087381e-06
cg05858607	`DOCK1	10	Island	TSS1500	-7.3354569247786	2.20966302873103e-13	-6.054037770863	2.46845706502287e-09	-4.19132570457601	4.29080180773342e-05
cg19613400	`BMP8B	1	Island	TSS200	-7.33353858987917	2.24153897995162e-13	-6.16541963679801	1.29869288431028e-09	-3.98749858582898	9.63713409981127e-05
cg09962400	`	21	Island		-7.33340754931251	2.24373281884426e-13	-5.99507033921195	3.48419302740029e-09	-4.29053384261537	2.86230082308535e-05
cg15645986	`TBC1D19	4	N_Shore	TSS200	-7.33321491926339	2.24696159877317e-13	-5.8797607606086	5.00225532933941e-09	-5.36394594535059	2.30938108152627e-07
cg14034852	`CLDN7	17	Island	Body	-7.33157047613187	2.27471147194631e-13	-6.66887248719972	5.73724384429473e-11	-3.1059556455311	0.00221908100954344
cg05597554	`COG3	13	Island	TSS200	-7.3302390857661	2.29742498604405e-13	-6.18102770518028	1.16382704696101e-09	-3.9582411599494	0.000107967486355583
cg22876561	`PHF14;PHF14;PHF14;PHF14	7	Island	1stExon;5'UTR;5'UTR;1stExon	-7.32996001717377	2.30221406272653e-13	-6.50235578743778	1.63767574562749e-10	-3.39453479959176	0.000849232280555377
cg25608569	`KIAA2026	9	Island	TSS1500	-7.32938491835932	2.31211424272613e-13	-5.86224406892459	7.49378812167685e-09	-4.51520163478212	1.11472799721985e-05
cg23236025	`PSRC1;PSRC1;PSRC1;PSRC1	1	Island	TSS1500;TSS1500;TSS1500;TSS1500	-7.329124435277	2.3166121425566e-13	-6.47529611625826	1.98330634075409e-10	-3.44150586792431	0.00078724646015361
cg11237535	`GAA;GAA;GAA	17	Island	TSS200;TSS200;TSS200	-7.32778086753834	2.33994909989887e-13	-5.67779774998829	2.22394971960842e-08	-4.77591220718887	3.56893902772589e-06
cg03890362	`MKL2	16	Island	TSS200	-7.32688497599555	2.35563836655102e-13	-6.01733459710738	3.06009342229081e-09	-4.23835353028543	3.54470317997975e-05
cg05337391	`LCMT1;LCMT1	16	Island	TSS200;TSS200	-7.32656427528185	2.36127970451601e-13	-5.97913334692808	2.76639555432951e-09	-5.06345994599994	9.6279011616398e-07
cg11159650	`LYAR;LYAR;ZNF509;LYAR	4	Island	1stExon;5'UTR;TSS200;TSS200	-7.32609882426904	2.36949091144388e-13	-6.40500688218471	3.00200516202157e-10	-3.55753089805107	0.000479621953094924
cg11491989	`RAN	12	Island	TSS200	-7.32482845566564	2.39204500821588e-13	-5.6221147633367	2.88879190583781e-08	-4.92383445629908	1.83168887988044e-06
cg11092157	`	14			7.32394850049284	2.40779120643343e-13	6.66918681698122	3.19122944023274e-11	3.54682061003883	0.000548345092845634
cg18202205	`	7			-7.32385292148617	2.40950764575893e-13	-6.44527153058069	1.39233541653441e-10	-4.06847696491825	7.01343038339635e-05
cg18803246	`DTX4;DTX4	11	Island	5'UTR;1stExon	-7.32065405373083	2.46765242778033e-13	-6.44023295212505	2.40825745146218e-10	-3.48463075318049	0.00062084213502007
cg05720871	`GOLSYN;GOLSYN;GOLSYN;GOLSYN;GOLSYN;GOLSYN;GOLSYN;GOLSYN;GOLSYN;GOLSYN;GOLSYN;GOLSYN;GOLSYN;GOLSYN;GOLSYN	8		Body;Body;Body;Body;Body;Body;Body;Body;Body;Body;Body;Body;Body;Body;Body	7.32027958717885	2.47454845261752e-13	6.281679449881	6.35360647123626e-10	3.76174797053298	0.00022775633811283
cg11209538	`GABBR1;GABBR1	6	N_Shore	Body;Body	-7.32022659244045	2.47552591015033e-13	-5.76353833382903	1.3142420883335e-08	-4.66729053310605	5.76920449683298e-06
cg23812581	`PEX10;PEX10	1	Island	TSS200;TSS200	-7.31992510470605	2.48109389886053e-13	-5.85634218572821	7.75055955900234e-09	-4.50645717016372	1.15718062664176e-05
cg12115659	`RPL30	8	N_Shore	Body	-7.31878616020758	2.50223959125856e-13	-6.42049584054157	2.72037979033689e-10	-3.51545201688582	0.000556944859298877
cg15233292	`YWHAH;C22orf24	22	Island	TSS200;5'UTR	-7.31726764417927	2.53070798828481e-13	-5.69162029082183	1.96174387176622e-08	-4.78977822361101	3.35474460983012e-06
cg00680768	`MAD2L1	4	Island	TSS200	-7.31653045732575	2.54464288571225e-13	-6.34950425981846	4.20602487742906e-10	-3.63531674437988	0.000362528045995263
cg17945233	`	11	Island		-7.31648437895856	2.54551639437115e-13	-6.4440800589686	1.53584486208447e-10	-3.72055083879677	0.000265357238900326
cg06916552	`CCRN4L	4	Island	TSS200	-7.31597820694841	2.55513131885086e-13	-6.24640444130631	7.86237251039499e-10	-3.81488992636587	0.000186656470971107
cg26474124	`	2	N_Shore		-7.31570282773137	2.56037722307567e-13	-5.96791915551185	4.07945994850449e-09	-4.30239342694614	2.72577202572842e-05
cg09893588	`NTSR1	20	Island	TSS200	-7.31504050255984	2.57303770988537e-13	-6.12000632091696	1.67744788088491e-09	-4.03357140474753	8.0478809526344e-05
cg26084005	`KIF1A	2	Island	TSS1500	-7.31407876776103	2.59153101920535e-13	-6.55581471049435	1.17228609043045e-10	-3.26880057099209	0.00130101130089636
cg15541049	`ANKRD16;FBXO18;ANKRD16;ANKRD16	10	Island	TSS200;TSS1500;TSS200;TSS200	-7.31388888622775	2.59519767608167e-13	-5.75083187819476	1.40862035615893e-08	-4.67918942178276	5.47570867114466e-06
cg16852490	`USP40	2	Island	3'UTR	7.31161104515203	2.63958252934481e-13	8.05171997223066	4.11392970228304e-15	0.642173738753058	0.522500631773799
cg18752527	`HECW2	2		Body	-7.31093654031394	2.65286808207572e-13	-5.55976781969022	3.00801491298543e-08	-7.07313483720618	2.45413509605074e-11
cg25201359	`ESYT2	7	Island	TSS200	-7.31002209233853	2.67098467156688e-13	-5.25160410310925	2.10043927281898e-07	-5.54183725926824	9.65090379514064e-08
cg10266124	`BRD2;BRD2	6	Island	1stExon;5'UTR	-7.30929568315659	2.68546248934964e-13	-6.16633258965017	1.27047924158877e-09	-3.9417359326843	0.000115082176226367
cg06851941	`FBXL2	3	Island	Body	-7.30913118208587	2.68875179407801e-13	-6.33974099741465	4.46436354470654e-10	-3.63749724600368	0.000359670650353098
cg15282907	`FBRSL1	12	N_Shore	TSS1500	-7.30867822955521	2.69782933522537e-13	-6.16197197182206	1.30392446666193e-09	-3.94813224544092	0.00011227370636888
cg20646217	`FLJ39582;THAP7;THAP7;FLJ39582	22	Island	TSS200;Body;Body;TSS200	-7.30830380072563	2.7053559183311e-13	-5.85501919312119	7.80928435452816e-09	-4.48532656676722	1.26627691126569e-05
cg25627403	`HNRNPUL1;HNRNPUL1	19	N_Shore	TSS1500;5'UTR	-7.30806030459372	2.7102616208429e-13	-5.90733037381044	5.78779459625124e-09	-4.39315732962542	1.86890691339287e-05
cg02446151	`	10	Island		-7.30801720142605	2.7111309276694e-13	-5.49276735063072	5.90408162755258e-08	-5.09883769222746	8.16325580424465e-07
cg03804213	`C13orf36;C13orf36	13	Island	5'UTR;1stExon	-7.30775212010645	2.71648312540643e-13	-6.03796516020577	2.71234827823419e-09	-4.16359159605147	4.79881216322273e-05
cg01108230	`ELAC2;ELAC2;ELAC2	17	Island	1stExon;1stExon;1stExon	-7.30547808776142	2.76282604980394e-13	-5.76401816468401	1.30793705247384e-08	-4.63910868124344	6.5260642778052e-06
cg10388430	`ADD3;ADD3;ADD3	10	S_Shore	5'UTR;5'UTR;5'UTR	-7.30531188591094	2.76624339741265e-13	-5.61717202884047	2.96282229025447e-08	-4.89612839536016	2.07779022701941e-06
cg17271338	`CYP4V2	4	Island	TSS1500	-7.30520152594556	2.76851484940173e-13	-5.72054447892689	1.66929210053691e-08	-4.71474041248013	4.68206325304667e-06
cg13428749	`UHRF2	9	Island	TSS200	-7.30272269841936	2.82002004392746e-13	-6.15583601894728	1.35244709340275e-09	-3.94686886405757	0.000112823215223785
cg26913791	`ATPAF1;ATPAF1	1	Island	TSS200;TSS200	-7.30219228499386	2.83116262868143e-13	-6.13033141598852	1.5737412359675e-09	-3.99049667803675	9.52523558946984e-05
cg00874891	`	5	N_Shore		7.30176814020621	2.84010389597088e-13	6.57558299638344	1.16415482153571e-10	3.17473456167632	0.00198400462776173
cg01335729	`ZCCHC3	20	Island	1stExon	-7.30138003163256	2.84830979237073e-13	-5.72304197170991	1.64613111380536e-08	-4.70265250595295	4.93857931394183e-06
cg27463736	`LIG4;ABHD13;LIG4	13	Island	1stExon;TSS200;5'UTR	-7.30127687778154	2.85049471970571e-13	-6.50211350760862	1.64015044090585e-10	-3.33708319561284	0.0010335763403079
cg19410790	`C1orf183;C1orf183	1	Island	Body;TSS200	-7.30061572335636	2.86453793699741e-13	-7.22812435768946	1.44292990664935e-12	-2.06337942447825	0.0408283447207406
cg02222234	`CCNYL1;CCNYL1	2	Island	TSS200;TSS200	-7.30053570453732	2.86624217579619e-13	-5.87937897947362	6.79439092508296e-09	-4.42696054898532	1.62140007654603e-05
cg08836619	`C5orf32	5	Island	5'UTR	-7.29971757814007	2.88372385430928e-13	-6.12192174148213	1.16255873966912e-09	-4.5799030647295	8.4398953778657e-06
cg24689196	`MAST4;MAST4	5	Island	Body;Body	-7.29903621909113	2.89836298956544e-13	-6.03005230161929	2.03507157149569e-09	-4.83724382459306	2.71152486562974e-06
cg26723560	`KIAA0753;TXNDC17	17	Island	TSS1500;1stExon	-7.29835687745012	2.91303144185357e-13	-5.67982376281183	2.11626683736703e-08	-4.75897041967311	3.84860635251271e-06
cg08446657	`C19orf29;C19orf29	19	Island	TSS200;TSS200	-7.29805459474021	2.91958179522564e-13	-6.40478500502616	2.99682934636299e-10	-3.50115432918356	0.000585778181159606
cg08336478	`JAM3	11		3'UTR	7.29800449291515	2.9206688797965e-13	6.67502294449573	5.51688878540777e-11	3.02744795998067	0.00284906348523418
cg08612975	`GCAT	22	Island	TSS200	-7.29786365428811	2.92372685651759e-13	-6.83031035636	2.03204251144066e-11	-2.75501495507292	0.00652646970127736
cg19141861	`COQ5	12	Island	TSS200	-7.29764130797749	2.92856098166603e-13	-5.90830361038273	5.768793256585e-09	-4.3686809039331	2.07033384839443e-05
cg13584718	`ZNF432	19	S_Shore	TSS1500	-7.29701074504671	2.94231305823176e-13	-6.40913645882936	2.91762090924768e-10	-3.49142193537975	0.000606199255421745
cg08205843	`ASNA1	19	Island	TSS200	-7.29596667654747	2.96522294548514e-13	-6.09622461432922	1.36071778546655e-09	-4.6412207808702	6.46617474270069e-06
cg10330885	`MGC23284;MVD;MGC23284	16	Island	Body;TSS1500;Body	-7.29465364950733	2.9942834090354e-13	-6.21008079345259	6.7470852021575e-10	-4.31414478658506	2.59665331728444e-05
cg19350511	`KCMF1	2	Island	TSS1500	-7.29428782731026	3.00242964199345e-13	-6.49280091337857	1.74375140115099e-10	-3.33995095568697	0.0010235534393562
cg05404701	`PAWR	12	Island	TSS200	-7.29348218061067	3.02044684586299e-13	-6.06645224524238	2.29485964533129e-09	-4.08487300719837	6.57247365233007e-05
cg15695648	`PCTP;PCTP	17	S_Shore	Body;5'UTR	-7.29179741685809	3.05846823063303e-13	-6.3829720643793	2.08191616856931e-10	-4.16683954582048	4.73647634492823e-05
cg11157584	`TNRC4	1	N_Shelf	TSS1500	-7.29139685802253	3.06757689582797e-13	-5.93039200124762	3.70325390990213e-09	-5.09574023428251	8.28233115234567e-07
cg07598272	`	16	N_Shore		-7.29088149919544	3.07933530081925e-13	-6.21034652669348	9.79235489189399e-10	-3.82695246951464	0.000178359357721763
cg26031047	`FAM84B	8	Island	TSS1500	-7.29085541242122	3.07993167118239e-13	-5.91398705866115	5.57041438780644e-09	-4.34677550704681	2.26811724238693e-05
cg03527887	`EXPH5	11	Island	Body	-7.29061745643249	3.08537682800668e-13	-6.0945757320081	1.94953496517649e-09	-4.02884223826828	8.19873313895544e-05
cg14094347	`QSOX2	9	S_Shelf	Body	7.2903144300295	3.09232468233663e-13	6.92468035805847	1.09722299028002e-11	2.57439422792345	0.0109391987065783
cg02594940	`USF2;USF2	19	Island	TSS1500;TSS1500	-7.2890726199612	3.12095804057195e-13	-5.75533730907554	1.37339870894446e-08	-4.62121971338377	7.05519983250797e-06
cg17363305	`UBE2G2;UBE2G2	21	Island	TSS200;TSS200	-7.28876602086781	3.12806751528591e-13	-5.61616936624635	2.97922630414612e-08	-4.86449972626802	2.39787981990633e-06
cg24409649	`FAM60A;FAM60A;FAM60A	12	Island	TSS200;TSS200;TSS200	-7.28839489026821	3.13669464079961e-13	-5.37631286047844	1.08944178962383e-07	-5.28411118566994	3.39400225711253e-07
cg04776910	`ZNF497	19	Island	TSS200	-7.28756004475529	3.15618656040544e-13	-6.0293283063798	2.86005503764959e-09	-4.13676697511864	5.34444713372521e-05
cg26571942	`LBH	2	Island	Body	-7.28736147737776	3.16084018299037e-13	-6.41039877327	2.89502927038656e-10	-3.46973958601451	0.000654117929877992
cg20520273	`CCDC138	2	Island	TSS200	-7.28534461475108	3.20849084285039e-13	-5.62429324614981	2.84881698061543e-08	-4.84335858890935	2.63788398560466e-06
cg12163131	`	10	S_Shelf		-7.28372221116113	3.24733337327768e-13	-5.87708959135766	6.8840154591259e-09	-4.39704691503378	1.83868134590588e-05
cg11775292	`	15	S_Shore		7.28301634881065	3.26437649784089e-13	5.50345230832862	5.51237092481233e-08	5.0504403493476	1.02285970786683e-06
cg21612666	`HMGN4	6	N_Shore	TSS1500	-7.28237604961648	3.27991256227925e-13	-5.51385664824957	5.21969257857087e-08	-5.02761125954045	1.13706743246932e-06
cg21986225	`SCOC;SCOC;SCOC;SCOC;SCOC;SCOC;SCOC;SCOC	4	Island	Body;Body;Body;Body;Body;Body;Body;Body	-7.28229093599668	3.28198319890825e-13	-6.20862646895362	9.86656265070417e-10	-3.81312424172314	0.00018790121257481
cg14630722	`TMOD1;TMOD1	9	N_Shore	TSS1500;TSS200	-7.28201053210585	3.28881392599014e-13	-5.84356269911152	8.39239555553351e-09	-4.44651269901156	1.49293916055878e-05
cg15899948	`SLC27A6;SLC27A6	5	Island	TSS200;TSS200	-7.28151307290039	3.30096656311665e-13	-5.64148233571284	2.59092764500609e-08	-4.80550266302916	3.12685676531575e-06
cg19182986	`NRGN;NRGN	11	N_Shore	Body;Body	7.28133982501928	3.30520925304132e-13	6.1508129733753	1.39347819293324e-09	3.91252610412659	0.000128777356025947
cg23257840	`ZNF264;ZNF264	19	Island	5'UTR;1stExon	-7.27886600594859	3.36637834476312e-13	-5.71464917483133	1.81313613286116e-08	-4.61990832706429	7.09557394346647e-06
cg02689514	`CBFA2T3;CBFA2T3	16	N_Shelf	5'UTR;Body	-7.27807860674952	3.38608027720009e-13	-6.66641649581697	5.82762637803871e-11	-3.00232516714152	0.00308305147097937
cg23328778	`TYSND1;TYSND1	10	Island	TSS200;TSS200	-7.27675746350573	3.41939200301916e-13	-6.31447722510258	5.20705469198655e-10	-3.61645026778911	0.000388159500829245
cg25163979	`	13	Island		-7.27540434832462	3.4538434713904e-13	-6.22555015000744	8.91357897860042e-10	-3.76956905266726	0.000221212156177322
cg14150687	`CDH23;CDH23	10		Body;Body	7.273001093337	3.51587475306136e-13	6.48981302359771	1.98020483245203e-10	3.28786645913758	0.00138192267364388
cg04778433	`LOC389033	2		Body	-7.27222242564231	3.53620692307894e-13	-6.29974160506848	5.6946893167746e-10	-3.63312446614975	0.000365422415720091
cg16139239	`SPAST;SPAST	2	Island	TSS1500;TSS1500	-7.27182240756755	3.54669684146678e-13	-5.99704492440372	3.44437320165205e-09	-4.1628081330027	4.81396550905069e-05
cg19884345	`HIST1H4D	6	S_Shore	TSS200	-7.27167220440644	3.55064359744497e-13	-6.30876793108863	5.39093858983835e-10	-3.61619516165625	0.000388517491834566
cg21359254	`	2	N_Shore		-7.27157512153898	3.55319685283174e-13	-5.85478646486296	8.25558999371542e-09	-4.37308313371518	2.03263336610952e-05
cg17989358	`MTPAP	10	Island	Body	-7.27121282616818	3.56274106122954e-13	-5.95068467600742	4.50762011417189e-09	-4.24282674754728	3.48058759061383e-05
cg12741255	`ISM1	20	Island	TSS1500	-7.27038359409285	3.58468098146209e-13	-6.07455280966473	2.1880736629736e-09	-4.02406854714432	8.35373292418876e-05
cg21501987	`	13	Island		-7.26900989036924	3.62131891396813e-13	-6.47755306178633	1.91097156691452e-10	-3.31501896296277	0.00111380641887849
cg26817217	`TOX3;TOX3	16	N_Shore	5'UTR;TSS200	-7.26872169766954	3.62905181543408e-13	-6.31837019346346	5.08520340928179e-10	-3.59341325680248	0.000421770502160447
cg23278418	`VPS13D;VPS13D	1		Body;Body	-7.26836117985663	3.63874820786196e-13	-6.43255832251126	1.65383585299361e-10	-3.6089407280543	0.000398828671813935
cg25350198	`SPATA1;GNG5	1	Island	TSS200;5'UTR	-7.2675656634464	3.66023430907672e-13	-6.18615794505094	1.12869491577098e-09	-3.82278910162791	0.000181182810550577
cg12024969	`SH2D3A	19	Island	TSS1500	-7.2666643499437	3.68472845672617e-13	-6.45123908279019	2.24972785864722e-10	-3.35640272468029	0.000967783228638754
cg11198309	`LIG4;ABHD13;LIG4	13	Island	1stExon;TSS200;5'UTR	-7.26619218782668	3.69762413915524e-13	-5.9731370151685	3.95784550785734e-09	-4.19334738509476	4.2558523253406e-05
cg11356029	`TNPO1	5	Island	Body	-7.26604358723727	3.70169187745973e-13	-6.4522058220245	2.23630165315519e-10	-3.35345590523228	0.000977559617982583
cg26188818	`SLC2A1	1	Island	Body	-7.26530716707379	3.72191531557679e-13	-6.45275533661362	2.2802026922906e-10	-3.34251525122604	0.0010979233377625
cg09363991	`CA6	1		TSS1500	7.26395878569168	3.75922591804086e-13	6.87420906862604	1.52690522107155e-11	2.60966780133413	0.00991025075634084
cg07234248	`RNF138;RNF138	18	Island	5'UTR;TSS200	-7.26335731095897	3.77598735390444e-13	-5.60092681010689	3.2397496797363e-08	-4.83994391618434	2.67876560782996e-06
cg07399355	`MUC1;MUC1;MUC1;MUC1;MUC1;MUC1;MUC1	1	N_Shore	TSS1500;TSS1500;TSS1500;TSS1500;TSS1500;TSS1500;TSS1500	-7.26278926734159	3.79188453300206e-13	-5.80211781153076	7.89652538389353e-09	-5.3722195327528	2.21852812147634e-07
cg02154874	`VEZT;FGD6;FGD6	12	Island	TSS1500;1stExon;5'UTR	-7.26097453748117	3.84311293948803e-13	-5.4176971093353	8.74073655996141e-08	-5.15625506684325	6.2342497177114e-07
cg14893576	`	2	N_Shelf		-7.2601193610746	3.86748891221824e-13	-6.20078646237732	7.14508050860782e-10	-4.23863269387522	3.54066904356159e-05
cg22544376	`DGUOK;DGUOK;DGUOK;DGUOK	2	Island	1stExon;5'UTR;5'UTR;1stExon	-7.25988696827173	3.87413923753896e-13	-5.94469705723065	4.72276617594091e-09	-4.2232565978148	3.76953326644202e-05
cg22762615	`FGFR2;FGFR2;FGFR2;FGFR2;FGFR2	10	Island	TSS1500;TSS1500;TSS1500;TSS1500;TSS1500	-7.25835158997427	3.91835982137097e-13	-6.29232250866191	5.95683242402155e-10	-3.61813852853322	0.000385798175193622
cg02187348	`SPG7;SPG7	16	Island	TSS200;TSS200	-7.25796792053631	3.9294871010393e-13	-5.77952335879979	1.19849332460799e-08	-4.51607009000564	1.11059451713087e-05
cg05271360	`ORMDL3	17	Island	TSS200	-7.25773265327485	3.93632572443637e-13	-6.75718771922235	3.58754139663156e-11	-2.7989412145596	0.0058163409124902
cg05810323	`NEK3;NEK3;NEK3;NEK3	13	Island	5'UTR;TSS200;5'UTR;Body	-7.25741541870914	3.9455654372574e-13	-5.51225102555423	5.25586857104994e-08	-4.9833631680316	1.39462510854131e-06
cg18388802	`ARVCF	22	Island	TSS200	-7.25671508198574	3.96603878360568e-13	-6.2953366965648	5.84893705347767e-10	-3.60955390601998	0.000397947258668153
cg19349369	`SERPINB1	6	Island	TSS200	-7.25615118244215	3.982599368731e-13	-5.45012806876365	7.34765258945529e-08	-5.08968575571841	8.51996606215527e-07
cg21137557	`LVRN	5		Body	7.25583468858687	3.99192388304186e-13	5.42721515816165	8.30728688510497e-08	5.12920314365481	7.08048233523296e-07
cg01433654	`ARL15	5	N_Shore	Body	7.25486293407333	4.02068779765117e-13	6.34299630918014	2.68959879442109e-10	4.172057418362	4.63794896639504e-05
cg00890041	`NEU1;NEU1	6	Island	5'UTR;1stExon	-7.25444500029391	4.03312112875651e-13	-5.70600602322288	1.81054880920183e-08	-4.6378043635838	6.56331532140274e-06
cg18100876	`COX6C	8	Island	TSS200	-7.25441549543544	4.03400030966795e-13	-5.87163816810043	7.10209099193145e-09	-4.34746635232724	2.26161201237568e-05
cg04987362	`CNTD1	17		Body	7.25279256004375	4.08265125817474e-13	6.79272760360773	2.59221846486156e-11	2.72993710883662	0.0070227744439185
cg24872076	`SLC35E1	19	Island	TSS200	-7.25156530548775	4.11982297099703e-13	-6.20932585872942	9.82527766974244e-10	-3.74990102156482	0.000238018645415897
cg21733927	`SEPT9;SEPT9;SEPT9	17		1stExon;5'UTR;Body	7.25125321325272	4.12932865972067e-13	6.29312831352469	3.69352287783264e-10	4.33222117222202	2.40940781668462e-05
cg26856527	`SDK1;SDK1	7		Body;Body	7.25016236158419	4.16272326747587e-13	6.60444649384895	8.63152649483957e-11	3.05460185337551	0.00261460434550806
cg00500564	`FAM196A;DOCK1	10	Island	5'UTR;Body	-7.24947220157195	4.18398818744004e-13	-6.62308292876402	7.67226224270567e-11	-3.02054799517236	0.00291164593541792
cg25748391	`TOLLIP;LOC255512;TOLLIP	11	Island	1stExon;TSS200;5'UTR	-7.24935422564351	4.18763387232089e-13	-5.91774924123434	5.45109971491607e-09	-4.25644191018286	3.29219330283229e-05
cg26230724	`	2			7.24896399044903	4.19971513408383e-13	6.36128424207732	4.3427568803308e-10	3.50173475357207	0.000680792924331866
cg23238603	`	1			-7.2485102228903	4.21380633114408e-13	-5.80707885825999	1.02559446139873e-08	-4.44869418702371	1.4792279703681e-05
cg16347018	`ATP5E;ATP5E	20	Island	TSS200;TSS200	-7.24838591105186	4.21767477822571e-13	-5.26800160703247	1.92860132872105e-07	-5.38901697959909	2.04464560562954e-07
cg16956132	`LOC100190939	13		Body	7.2470954129775	4.25804023254566e-13	5.58035374198404	3.62675220228491e-08	4.84318632746213	2.63993183626445e-06
cg10044111	`PLEKHH1	14	Island	5'UTR	-7.24595329194043	4.29408087119641e-13	-5.58211947473076	3.5918469680935e-08	-4.837787247166	2.70490074688297e-06
cg09218354	`MATN3	2	Island	TSS200	-7.24571819591379	4.30153662410298e-13	-5.93934327543069	4.81296728074556e-09	-4.21126060235042	3.95783887342283e-05
cg13207702	`CA6	1		TSS1500	7.24519298973244	4.31823877833863e-13	7.70330774952134	5.22232756326418e-14	1.11876638881896	0.265723642716418
cg18893528	`	10			7.24442862847626	4.34266017173365e-13	6.39213833717722	3.23917127875941e-10	3.41511293455841	0.000791034332480579
cg12071536	`HOXC9;HOXC9	12	Island	5'UTR;1stExon	-7.24440034192759	4.34356652633442e-13	-6.0182973907798	2.18500246161338e-09	-4.70678505505626	4.84939461029396e-06
cg18414618	`MAP4K5;ATL1;MAP4K5	14	Island	TSS1500;TSS200;TSS1500	-7.24421028536803	4.34966111714768e-13	-6.61251209358555	8.20274480511502e-11	-3.02845652410023	0.00284002017037132
cg15883721	`EFCAB4A	11	N_Shore	TSS1500	-7.24415626230286	4.35139502029067e-13	-6.37173143185098	3.67122299852532e-10	-3.4503274649157	0.000700007499861531
cg11665745	`PSME4	2	Island	TSS1500	-7.24372327773306	4.3653164641545e-13	-6.37556862593142	3.58589198561058e-10	-3.44272892684435	0.000718777406308193
cg01881939	`ACTG1	17	Island	TSS1500	-7.24320868983106	4.38191852452043e-13	-5.70425130033404	1.82836518753955e-08	-4.61820722023063	7.14827816324666e-06
cg01213445	`PRC1;PRC1;PRC1	15	Island	Body;Body;Body	-7.24271275185353	4.39797754919298e-13	-5.78015422545108	1.19423458981109e-08	-4.48418291948549	1.2724550891332e-05
cg09725962	`HIP1	7	Island	Body	-7.24145397936845	4.43899795081995e-13	-5.29449789700784	1.6767311575241e-07	-5.33277958819022	2.68525687461119e-07
cg04221794	`BNIP2	15	Island	1stExon	-7.24118322134496	4.44787028324412e-13	-6.39052070694107	3.28156541645942e-10	-3.41181953817164	0.000800090847978218
cg18683143	`MAGEF1;MAGEF1	3	Island	1stExon;5'UTR	-7.24096582414623	4.45500666325027e-13	-6.84546880178512	1.84139836278261e-11	-2.61364183706207	0.00979994724577551
cg19558236	`GPSM3;NOTCH4	6	Island	TSS1500;Body	-7.23971243751274	4.49637070936215e-13	-6.09334547288872	1.95867868912407e-09	-3.92924589203661	0.000120759745435887
cg24923700	`PLS1	3	Island	TSS200	-7.2385743426898	4.53425644889949e-13	-5.84574739156607	8.23318229684349e-09	-4.36087727956888	2.13881723435952e-05
cg04998375	`GRIP2	3		Body	7.23855004873882	4.5350685711758e-13	5.63536771060824	1.95606530678703e-08	6.55295649600651	4.72153899012531e-10
cg01288977	`RNF138;RNF138	18	Island	5'UTR;TSS200	-7.23655465149278	4.60226260905744e-13	-5.58245919508105	3.58516889353255e-08	-4.81822749942757	2.95345781213251e-06
cg26561623	`SAP30BP;RECQL5;RECQL5;RECQL5;RECQL5;RECQL5;RECQL5	17	Island	TSS1500;5'UTR;1stExon;5'UTR;5'UTR;1stExon;1stExon	-7.23625992098841	4.61227002038574e-13	-6.25460690912257	7.4830055351409e-10	-3.63966088448944	0.00035685632805433
cg24073466	`PHYHIPL;PHYHIPL	10	Island	Body;TSS200	-7.23567213000812	4.63229197825116e-13	-6.62532165067408	7.70009086548203e-11	-2.99595054456263	0.00314516718048008
cg06798479	`HSP90AA1;HSP90AA1	14	Island	5'UTR;Body	-7.23475474928655	4.66371143010794e-13	-5.49039494868533	5.91556640869901e-08	-4.97594281415824	1.44301846197518e-06
cg11959630	`SAAL1	11	Island	TSS200	-7.23460097880722	4.66899836586616e-13	-5.90202466365288	5.96696063255281e-09	-4.25423122669943	3.32210471275632e-05
cg24183909	`TRAM1L1	4	Island	TSS200	-7.23447267318896	4.67341427234024e-13	-6.60233939135749	8.7471151740579e-11	-3.02663634401521	0.00285636008063935
cg01306614	`TNPO1	5	Island	TSS200	-7.23433377200759	4.67819947022797e-13	-6.23352589093157	8.49624931823137e-10	-3.67271986400785	0.000316353548554456
cg26172385	`EIF3A	10	Island	TSS200	-7.23410344298747	4.68614499675419e-13	-5.78668369396057	1.15101344529071e-08	-4.45536802978733	1.4380279874594e-05
cg25269342	`	2			-7.23385835504914	4.69461420443583e-13	-6.43828326660685	1.60128290594918e-10	-3.48080488479073	0.000629236623083067
cg07703462	`SSPO	7	Island	Body	-7.23369053000694	4.70042219885175e-13	-7.1482897703438	2.47772822052524e-12	-2.06825327245804	0.0403594733665446
cg15886004	`MGAT1;MGAT1	5	N_Shore	TSS200;5'UTR	-7.23276591155518	4.73254760950987e-13	-5.46987816004959	6.66654160730224e-08	-4.99142493869311	1.34383010411359e-06
cg18139254	`	14	Island		-7.23272480053121	4.73398098650728e-13	-4.9792955397098	8.3719359056016e-07	-5.86757366976303	1.85630199089284e-08
cg01475134	`ACO2;PHF5A	22	S_Shore	Body;TSS1500	-7.23074132499086	4.80364559007864e-13	-5.26235550255765	2.05771350253059e-07	-5.27764422473399	3.50089806623204e-07
cg12118082	`SLCO2A1;SLCO2A1	3	Island	1stExon;5'UTR	-7.23022600169607	4.82190914614299e-13	-5.96046249862694	4.25960342069031e-09	-4.14298831476038	5.21286188324374e-05
cg11218092	`LMCD1	3	Island	TSS200	-7.22951314630014	4.84728586627362e-13	-5.41669875777346	9.15483689289222e-08	-5.01898208349874	1.18337737047994e-06
cg07937542	`	6			-7.2285972828321	4.88008194713768e-13	-5.98640081566317	3.6644044733583e-09	-4.09424374562955	6.332456918823e-05
cg08591761	`ZNF17	19	N_Shore	TSS1500	-7.2266354253068	4.95106887418607e-13	-5.64557042638965	2.53302039634782e-08	-4.68760716613437	5.2768281908172e-06
cg27306034	`FAM189B;FAM189B;FAM189B;FAM189B	1	Island	1stExon;5'UTR;5'UTR;1stExon	-7.22565487101615	4.98692781003123e-13	-5.70376512764533	1.85237987905674e-08	-4.572098746511	8.72930492711335e-06
cg05210380	`	6			7.22562739422662	4.98793630220849e-13	4.38687563285368	1.36491166853955e-05	6.89149769092132	7.00143835327848e-11
cg08047860	`GLRX5;SNHG10;SCARNA13;SNHG10	14	Island	TSS200;TSS200;TSS1500;TSS200	-7.22477240015508	5.01941776515593e-13	-6.02009344140559	3.01118659431081e-09	-4.0274779979539	8.24274781235818e-05
cg24211478	`ATG5	6	Island	TSS200	-7.22368152103128	5.05986805108316e-13	-5.90659458484742	5.81232415889146e-09	-4.22418917206806	3.75525875378467e-05
cg22966060	`HSD11B1L;HSD11B1L;HSD11B1L;HSD11B1L;HSD11B1L;HSD11B1L	19	Island	Body;Body;5'UTR;Body;Body;5'UTR	-7.22359100164258	5.06323889537378e-13	-5.92149365694213	3.93696653531702e-09	-4.86830189039162	2.35701680284633e-06
cg00782925	`WDR87;SIPA1L3	19	S_Shore	TSS1500;5'UTR	-7.22349644237321	5.06676253511046e-13	-5.85406103471184	5.82181267129095e-09	-5.10787328143923	7.82530948047849e-07
cg14650577	`TACR1;TACR1	2	Island	TSS200;TSS200	-7.2229825497331	5.08595427752584e-13	-5.95744976256714	4.33456791652431e-09	-4.13365260388485	5.41150266154643e-05
cg25309564	`C22orf41	22	Island	TSS200	-7.22272688223905	5.09552895970186e-13	-6.19417001709291	1.07589112684818e-09	-3.71827283949108	0.000267598690148807
cg09649245	`ALX4	11	N_Shore	TSS1500	-7.22229799602008	5.11163039895581e-13	-6.63609772974845	7.06515229098133e-11	-2.94290739899834	0.00370834521518052
cg17149859	`ANKS1A;TAF11	6	N_Shore	TSS1500;TSS1500	-7.22020037839776	5.19110254184914e-13	-5.71518707131517	1.72005012576537e-08	-4.55261607638386	9.4940678232836e-06
cg12980527	`NIPBL;NIPBL	5	N_Shore	TSS1500;TSS1500	-7.21943507572991	5.22039846072375e-13	-6.06136567975216	2.3644963186953e-09	-3.94437683466876	0.000113914624532586
cg11200367	`VPS52;RPS18	6	Island	TSS1500;Body	-7.21920883375821	5.22909008678925e-13	-6.36303525132195	3.87202821929493e-10	-3.41522957317748	0.000790715351641319
cg11422045	`HSD17B12	11	N_Shore	TSS200	-7.21909623601099	5.2334210919418e-13	-6.53546049647046	1.33621724463731e-10	-3.11390847009339	0.00216301876325543
cg05031240	`	7	Island		-7.2186202842263	5.25176723429336e-13	-6.10379014308948	1.84151981148705e-09	-3.86838180844919	0.000152444025799015
cg07740877	`TCFL5	20	Island	TSS1500	-7.21779909801826	5.28356942987258e-13	-5.89430815285079	6.23722225124288e-09	-4.23385232369764	3.61035916720472e-05
cg27458475	`BZW2;BZW2;BZW2;ANKMY2;BZW2;BZW2	7	Island	Body;1stExon;5'UTR;TSS1500;5'UTR;1stExon	-7.21765746044048	5.28907373419082e-13	-6.27425265624602	6.64566889185812e-10	-3.56769510878711	0.000462519609772533
cg19272617	`SULF2;SULF2;SULF2	20	Island	TSS200;TSS1500;TSS200	-7.21680150391086	5.32245784389466e-13	-6.28778176943139	6.14078145755597e-10	-3.54234484654886	0.000506284230500588
cg13831388	`RPTOR;RPTOR	17	Island	Body;Body	7.21556908166691	5.37088857417725e-13	6.1791823320896	1.17672374550524e-09	3.73009664087569	0.000256155945575249
cg02281226	`STX8;STX8;WDR16;WDR16	17	Island	5'UTR;1stExon;TSS1500;TSS1500	-7.21445254178947	5.4151388458006e-13	-5.52122483662842	5.00621706003745e-08	-4.88094656959887	2.22590650814006e-06
cg27349909	`PCGF3	4		Body	7.21431693211156	5.42053759228456e-13	6.80888702772799	2.33489026935234e-11	2.62398164312798	0.00951810093029993
cg08317267	`ERCC5	13	Island	TSS200	-7.213475901632	5.45413800083868e-13	-6.75027363014616	3.4082613138887e-11	-2.72500749113956	0.00712425898829406
cg24004745	`IL1RAP;IL1RAP;IL1RAP;IL1RAP;IL1RAP;IL1RAP	3	Island	TSS200;TSS200;TSS200;TSS200;TSS200;TSS200	-7.21338702448154	5.45770069819494e-13	-6.28093543807935	6.38228991645122e-10	-3.54736641280103	0.000497317520864115
cg10921983	`TCTN2;TCTN2;TCTN2;TCTN2	12	Island	5'UTR;1stExon;5'UTR;1stExon	-7.21219517842273	5.50569794037561e-13	-6.71356770408783	4.31322044733875e-11	-2.78675221587954	0.00594399799196419
cg23908794	`	6			-7.21206393560334	5.51100852767099e-13	-5.88714382969356	6.51361596878821e-09	-4.23330517518545	3.61841886155539e-05
cg04275901	`SGCE;SGCE;PEG10;SGCE;PEG10	7	Island	Body;Body;TSS1500;Body;TSS1500	-7.2111281989728	5.54901804478024e-13	-6.00061424527834	3.38175789826124e-09	-4.03302090961555	8.06530393905055e-05
cg08352786	`MYF6	12	N_Shore	TSS1500	7.21032932914175	5.58167161821934e-13	4.94146033272268	1.01848978862158e-06	6.30007869641358	3.56927540410151e-09
cg12376068	`C12orf53	12	Island	5'UTR	-7.20811408456033	5.67320916975426e-13	-6.48394483462039	1.83654575929228e-10	-3.18094284181558	0.0017398959479008
cg07909422	`SIRT5;SIRT5	6	N_Shore	TSS1500;TSS1500	-7.20803569657776	5.67647514497776e-13	-5.39788861492006	9.71430813888196e-08	-5.08415159190119	8.74295317742661e-07
cg24710320	`MGC2889;HRASLS	3	Island	TSS1500;TSS200	-7.2072949268315	5.70743003433586e-13	-6.09947061140624	1.8891182020876e-09	-3.85309994165228	0.000161557487204875
cg25922239	`LEMD2	6	S_Shore	TSS200	-7.20707655323984	5.71658689916065e-13	-5.26750292423126	1.93067963378127e-07	-5.31072358663704	2.98654492870693e-07
cg04677344	`AGGF1	5	Island	Body	-7.20702867233092	5.71859657365189e-13	-5.35590871732096	1.21376707312033e-07	-5.15569147483459	6.25083422266439e-07
cg25066490	`NEURL;NEURL	10	Island	5'UTR;1stExon	-7.20686549248232	5.72545082755789e-13	-5.95466377516129	4.4050346041523e-09	-4.10601453818452	6.04279335615552e-05
cg15420153	`SGPL1	10	Island	TSS200	-7.20638358873611	5.74573996888528e-13	-7.02516570579289	5.64912255122699e-12	-2.22893490000404	0.0272790228974167
cg05166317	`VIPR2	7	S_Shore	Body	7.20583638345587	5.76886402954981e-13	8.36074817883858	4.00939343586864e-16	-0.112843185122821	0.910484571283078
cg11302857	`ZCCHC3	20	Island	TSS200	-7.20573404669856	5.77319875482252e-13	-5.706414914926	1.82911095508162e-08	-4.525470689323	1.06678436436722e-05
cg08416723	`C3orf25	3	Island	TSS200	-7.20559901675913	5.77892317382603e-13	-5.85191930254535	7.96631034621688e-09	-4.28187229283927	2.96612480202002e-05
cg05758434	`ZDBF2	2	Island	TSS200	-7.20533599599497	5.7900896010976e-13	-5.89097266451026	6.35770424286102e-09	-4.21455015633741	3.90532548766612e-05
cg11661263	`GPR180	13	Island	TSS1500	-7.2052515407835	5.79367959965289e-13	-5.93135977446918	5.19100552440718e-09	-4.25645376928573	3.9216155972628e-05
cg00686197	`C6orf27	6		Body	7.20448521855378	5.82635424434827e-13	6.50817667923252	1.57930723483018e-10	3.13115309634872	0.0020459195126491
cg05045343	`C2orf62	2	Island	3'UTR	-7.20424513879869	5.83662799402162e-13	-6.15329973670521	1.37301514717103e-09	-3.75260795753732	0.000235635978804133
cg08742288	`FCHSD1	5	Island	TSS200	-7.20377137592812	5.856953966296e-13	-6.40362489111215	3.06613972406922e-10	-3.31613908783728	0.00110959749608315
cg13825475	`GIPC1;GIPC1;GIPC1;GIPC1;GIPC1;GIPC1	19	Island	TSS1500;TSS1500;TSS1500;TSS1500;TSS1500;TSS1500	-7.20168647227809	5.94723205107673e-13	-5.36464917238468	1.16079721374737e-07	-5.12596808829771	7.18885072360267e-07
cg26251069	`C18orf56;TYMS;TYMS	18	Island	3'UTR;1stExon;5'UTR	-7.20150465546938	5.95516932553557e-13	-5.90885840855653	5.73717536184103e-09	-4.17547371545455	4.57450370741758e-05
cg14039054	`	9	N_Shore		7.19961252416791	6.03839070713567e-13	7.81185869088642	2.38900462080323e-14	0.836554260850216	0.404972243971633
cg21558268	`THOP1	19	Island	TSS200	-7.19839955410779	6.09234007332225e-13	-5.67403626904972	2.16329945505002e-08	-4.58074565407094	8.40920755920965e-06
cg27512727	`	10			-7.19804295460855	6.10829038762207e-13	-5.82223669690812	9.41110079316287e-09	-4.32029757948763	2.53140679981611e-05
cg23259477	`	3			7.19704758733789	6.15302933803232e-13	6.38627236278894	3.35799084237555e-10	3.32978891460467	0.00105948380988875
cg09964670	`TMEM146;LONP1	19	Island	TSS200;TSS1500	-7.19677156845767	6.16549247534347e-13	-6.58165368632915	9.96549898126559e-11	-2.98681659455886	0.00323617460906864
cg19607983	`UGDH	4	Island	5'UTR	-7.19568515550285	6.21478869694981e-13	-6.0335070853752	2.78406348828173e-09	-3.94527832138616	0.000113518656664029
cg06115741	`TP53INP2	20	Island	TSS200	-7.19524676619949	6.234790093989e-13	-5.30287901829005	1.66674638312672e-07	-5.14155601110349	6.68107800601013e-07
cg04701034	`NID2	14	Island	TSS1500	-7.19435293386149	6.27576693453664e-13	-7.45707845640712	2.97889677236158e-13	-1.44771137782941	0.150226126323013
ch.18.1186861R	`	18			7.19423980912622	6.2809718347248e-13	7.11484907435419	4.44599653223476e-12	2.03538281827631	0.0443679022051801
cg16378243	`INPP5A	10	S_Shore	Body	7.19384186104686	6.29931523197111e-13	6.16597442575183	1.273194404192e-09	3.70940343554668	0.00027649722061473
cg21309305	`MORC3	21	Island	TSS200	-7.19373289583721	6.30434714297404e-13	-5.82905889662583	9.05335803248386e-09	-4.29964459676068	2.75685034211087e-05
cg16678032	`EXOC3;C5orf55	5	Island	5'UTR;TSS200	-7.19358237872918	6.31130437206795e-13	-5.50320515994012	5.51974863209742e-08	-4.87041558037192	2.33459235060498e-06
cg02169981	`WNT11	11	Island	Body	7.19354204611862	6.3131699133922e-13	6.2235078924222	9.02362196973578e-10	3.6079682466403	0.000400230333874302
cg10937591	`KCND3;KCND3	1	Island	TSS1500;TSS1500	-7.19307276925162	6.33491563958218e-13	-5.87452532512211	5.15953349594821e-09	-4.9589689505123	1.55990868404074e-06
cg26002659	`C19orf28;C19orf28;C19orf28	19	Island	TSS1500;TSS1500;TSS1500	-7.19244438190049	6.3641495463494e-13	-5.73309709105797	1.55600746346805e-08	-4.46522244362406	1.37920221127411e-05
cg25337069	`ETF1	5	Island	TSS200	-7.19232150959017	6.36988128594347e-13	-6.41187908797153	2.93351453292485e-10	-3.26009522325045	0.00144041572151902
cg03441945	`ABAT;ABAT;ABAT	16		Body;Body;Body	7.19164235552018	6.40165395644491e-13	5.70414581648272	1.31623951160997e-08	6.14769228098622	4.27535317990626e-09
cg10592546	`TRIM41;TRIM41	5	Island	TSS1500;TSS1500	-7.19031485363915	6.46420799656945e-13	-6.1098126426957	1.78174043010011e-09	-3.80016795791217	0.000197278215154118
cg06269001	`ENTPD6;ENTPD6;ENTPD6;ENTPD6	20	Island	5'UTR;5'UTR;1stExon;1stExon	-7.18986535558929	6.48552475753988e-13	-5.46328452959985	6.91961411697599e-08	-4.91390036264734	1.91649803114769e-06
cg00436722	`	10			7.18948803597208	6.50347182990784e-13	6.88727830049745	1.401950006005e-11	2.43649788003123	0.0159394579792779
cg02032552	`CCDC25	8	Island	Body	-7.18843355966263	6.55388652907011e-13	-6.10899876351604	1.79033510442179e-09	-3.79780163192146	0.000199037959757717
cg05965892	`	8	N_Shelf		7.18821964929959	6.56416032994634e-13	5.67575258680749	2.14277116142112e-08	4.55719693355877	9.30865903832797e-06
cg22842854	`HIP1R	12	Island	TSS200	-7.18815536439696	6.56725092787668e-13	-6.20950788334843	6.76826142773644e-10	-3.99845984753361	9.23399261241396e-05
cg08295285	`	19	Island		7.18750404428547	6.5986448335613e-13	6.17024440166772	1.36237580230424e-09	3.75979712265762	0.000278029751948221
cg20684491	`	1	S_Shore		7.18704004307995	6.62109970243696e-13	5.59052021111646	3.43020359858078e-08	4.70419067867321	4.90520068213401e-06
cg27216807	`	6			7.1860963219286	6.66700181162553e-13	5.92126316487786	5.43201602596285e-09	4.24661838139783	4.07705651384861e-05
cg00026776	`C6orf10	6		Body	7.18589796988917	6.67668920703986e-13	5.86919071580936	7.31979805519218e-09	4.35237518574533	2.67545087805827e-05
cg13439181	`	9	Island		-7.18568418053149	6.68714602503924e-13	-7.49088993799577	2.3646292259239e-13	-1.3760702461071	0.171352585934425
cg11029746	`PPCDC	15	Island	TSS200	-7.18560621866008	6.69096327784068e-13	-6.46591623504069	2.05412751290219e-10	-3.16712296942486	0.00182028652804037
cg01430725	`MRPS15;MRPS15	1	Island	5'UTR;1stExon	-7.18388614410241	6.77572973299877e-13	-6.33316852555668	4.64694892541525e-10	-3.3962991278534	0.000844089925308552
cg11201541	`C17orf56;C17orf89	17	Island	1stExon;TSS1500	-7.18346697693123	6.79654580335398e-13	-5.74172989204542	1.48247944815172e-08	-4.4319786240847	1.58745357071175e-05
cg17880050	`	7	Island		-7.18339385409316	6.80018354863601e-13	-5.57045434275192	3.82863603518231e-08	-4.73199989910986	4.33796400429558e-06
cg09984545	`SAMD5	6	Island	TSS200	-7.18315048702693	6.81230444612556e-13	-5.9125378327095	5.61705161643634e-09	-4.13199070410225	5.44761274529712e-05
cg14467794	`	3			7.18279789904817	6.82990272114008e-13	7.47695676975733	1.24052595499197e-13	0.403933483475868	0.687410947918609
cg10952801	`PLEKHM1;PLEKHM1;PLEKHM1	17	Island	TSS1500;TSS1500;TSS1500	-7.18048140151326	6.94663796445973e-13	-5.64489059301161	2.72734791762684e-08	-4.52597467674611	1.06448315717037e-05
cg03826564	`	15	Island		-7.17971777645691	6.98554685046264e-13	-6.01603751582966	2.21503618647939e-09	-4.51942608300965	1.09475947378267e-05
cg04066634	`EPB41L2;EPB41L2;EPB41L2	6		3'UTR;3'UTR;3'UTR	-7.1792087855666	7.01160013224433e-13	-6.39973348350085	2.04072905403598e-10	-3.43458514412077	0.000739416409476657
cg04762213	`BAT2	6	Island	TSS1500	-7.17916315776559	7.01394029662685e-13	-5.20001354720667	2.73941112907518e-07	-5.37267899905528	2.21358593054344e-07
cg19044706	`C2orf54;C2orf54	2	S_Shore	Body;Body	7.17827070877718	7.05986679267549e-13	6.06146162633593	2.36316388856072e-09	3.86114812429796	0.000156695405450427
cg13826862	`LOC389791;PTGES2;PTGES2;PTGES2;PTGES2	9	Island	TSS1500;1stExon;5'UTR;Body;Body	-7.17806789352778	7.07034500274128e-13	-4.93865507678592	1.02373578024776e-06	-5.82851256761241	2.26972698201273e-08
cg09315698	`UNC84A;UNC84A	7		Body;Body	7.17802249550776	7.07269252794019e-13	8.19967136799864	1.36110575053454e-15	0.113329590277594	0.910100364785256
cg16730369	`GRIK4	11		Body	-7.17481116140685	7.2407059327632e-13	-6.74012821681225	3.63786042004016e-11	-2.66477095966595	0.00847592496448755
cg18373354	`ST14;ST14	11	Island	1stExon;5'UTR	-7.17406644865421	7.28022460350209e-13	-7.38074469766415	5.06329846143732e-13	-1.54055641674863	0.125895463442779
cg05786569	`HIBADH;HIBADH	7	Island	5'UTR;1stExon	-7.17332215370409	7.31993262314023e-13	-5.79338763195277	1.1082235853513e-08	-4.32097589279375	2.52431058579614e-05
cg21017569	`KCNAB3	17	Island	TSS200	7.17246071630521	7.36615563452914e-13	6.51400407473831	1.52291584891243e-10	3.05632195904994	0.00260036786920565
cg00419186	`	19	Island		-7.17221697914916	7.37928600422146e-13	-6.34678465594963	4.27647903883252e-10	-3.3488904041117	0.000992888216349892
cg14003794	`LRRC3	21	N_Shore	TSS1500	-7.17140428391225	7.4232329564283e-13	-6.15265522707576	9.6232573460525e-10	-4.10880262553366	5.9760568870485e-05
cg10124287	`PPM1H	12	Island	Body	-7.17126233975394	7.43093497628743e-13	-5.75647665967378	1.36462847267554e-08	-4.38150793886008	1.96231121171187e-05
cg19837275	`BLCAP;BLCAP;BLCAP;BLCAP	20	Island	TSS200;TSS1500;TSS200;TSS1500	-7.17120000302617	7.43431990251308e-13	-5.9580491430659	4.31955199126283e-09	-4.02811646996647	8.22212077602853e-05
cg03589969	`CALM1;CALM1	14	Island	TSS200;Body	-7.17102420787622	7.44387385196516e-13	-5.965862956664	4.12837922585836e-09	-4.01406766187079	8.68754702961747e-05
cg13841734	`PGRMC2	4	Island	TSS200	-7.17035820346667	7.48017867567583e-13	-5.49869937680939	5.90587560426696e-08	-4.76816085376666	3.69436998857508e-06
cg03777804	`PLLP	16	Island	TSS200	-7.16935835241145	7.53500849187407e-13	-5.26778779435577	1.9337202127333e-07	-5.22630963396168	4.47369301312466e-07
cg08019564	`RCBTB2;RCBTB2	13	Island	1stExon;5'UTR	-7.16824984254174	7.5962581333543e-13	-5.85301820360141	7.89892874629991e-09	-4.20623558579706	4.03936153558701e-05
cg05439195	`	6			-7.16611568221803	7.71555837070957e-13	-6.39604080618226	3.16241353458755e-10	-3.25025551571459	0.00138403990084221
cg24668990	`XKR5	8	Island	Body	-7.16603449575879	7.72013284588173e-13	-5.99471393954142	3.49142794210368e-09	-3.95343676398248	0.000109994128360785
cg08855656	`NQO2	6	N_Shore	TSS200	-7.16493771673052	7.78219271428122e-13	-5.8682164489488	7.24239575456571e-09	-4.17291677860565	4.62191083991578e-05
cg16586093	`NBEAL1;NBEAL1	2	Island	1stExon;5'UTR	-7.16476203290838	7.79217895973932e-13	-6.16218675576234	1.30225715391334e-09	-3.65736487225292	0.000334594995153094
cg23505970	`MDN1	6	S_Shore	TSS1500	-7.16439357894903	7.81316354339519e-13	-6.68993399146242	5.01653180764627e-11	-2.73171843730504	0.00698642561732203
cg25649261	`HEBP2;HEBP2	6	Island	5'UTR;1stExon	-7.16358674417925	7.85930917619124e-13	-6.18093039918941	1.16450362315203e-09	-3.62214424374778	0.000380249473301837
cg22833065	`	17			7.16347258247344	7.86586003987655e-13	6.2053974984831	6.42835165108334e-10	4.75866440237447	4.96616409980747e-06
cg03110267	`C18orf25;C18orf25	18	Island	TSS200;TSS200	-7.16324707533127	7.87881591672361e-13	-5.59597430374479	3.32906837432229e-08	-4.64662318328899	6.31538679845702e-06
cg25932461	`SREBF2	22	Island	TSS200	-7.16208308657106	7.94602341738e-13	-6.00373724048271	3.3126901186332e-09	-3.92964991843194	0.000120571997079548
cg21777696	`SLC43A1;SLC43A1	11	Island	1stExon;5'UTR	-7.15993741703251	8.07139001563199e-13	-6.04775362323845	2.56115336201374e-09	-3.8481795585777	0.00016460005712114
cg20015535	`EGLN1	1	N_Shore	Body	7.15906395586092	8.12297856892122e-13	6.71345965776465	2.36663808187676e-11	2.5532267597833	0.0116016265614495
cg01451205	`USP2;USP2	11	Island	1stExon;5'UTR	-7.15892601953342	8.13115492990345e-13	-5.89360477176407	6.26244259942282e-09	-4.11629222357336	5.80024601380219e-05
cg07766672	`C8orf55	8	Island	TSS200	-7.15747639915707	8.21757316355667e-13	-6.13992746639012	1.4866145453356e-09	-3.68167457880063	0.000306152665134334
cg17849948	`SPATA2	20	Island	TSS1500	-7.1565028066985	8.27611866581897e-13	-6.02340042646769	2.9535673106705e-09	-3.88392945160529	0.000143673564414451
cg15632808	`MSI2;MSI2	17	Island	TSS1500;TSS1500	-7.15618533263657	8.29529785293579e-13	-5.65329606175374	2.42700586316113e-08	-4.53191495427392	1.03771701064299e-05
cg12410370	`ERMAP;ERMAP	1		Body;Body	7.15598706068727	8.3072979459646e-13	5.53824073505443	4.56408592888417e-08	4.73315500206542	4.31582753473947e-06
cg01183017	`F2RL1	5	Island	TSS200	-7.15591347169225	8.31175613649399e-13	-6.18115447898558	1.16610984449792e-09	-3.60613651942766	0.000402883044764674
cg01615704	`MALL;MALL	2	Island	5'UTR;1stExon	-7.15548148512365	8.3379742692937e-13	-8.44444252146723	2.12675580311425e-16	0.352021944723541	0.725830588387063
cg17868910	`DAAM2	6	S_Shore	TSS200	-7.15358327505731	8.45414570266016e-13	-6.08192321857332	2.09513864527929e-09	-3.77547441415127	0.000216389156964532
cg13386926	`NIPAL4	5	S_Shelf	Body	7.15286966100099	8.49822888995033e-13	6.20148024864499	1.1323140516416e-09	3.61372229952499	0.000464098691801828
cg08640252	`NME3	16	Island	Body	-7.15233585123588	8.53135217827702e-13	-7.95162103734446	8.67456885901722e-15	-0.503324957680157	0.616143835505515
cg10884867	`LOC100189589	2	Island	Body	-7.15174203005891	8.56834811302955e-13	-5.60831457935558	3.25868788383523e-08	-4.55006430287852	9.59888550534825e-06
cg00304695	`USP10	16	Island	TSS1500	-7.15149114460778	8.58402592194538e-13	-7.42037892171737	3.84641895160666e-13	-1.42554353580314	0.156537956283926
cg21913652	`	11			-7.1504780630858	8.64762018710991e-13	-7.14746777560537	1.33455140498818e-12	-1.23739795101937	0.218485966931346
cg02251859	`GPR98;GPR98	5	Island	TSS1500;TSS1500	-7.15043618689256	8.6502588136131e-13	-6.42565492283008	2.68623846476049e-10	-3.17228203748945	0.00178988221559991
cg25183958	`CBLL1;CBLL1	7	Island	TSS200;TSS200	-7.14995062077502	8.68091218573079e-13	-5.81776150475575	9.65321247457276e-09	-4.23110091444691	3.65106302347634e-05
cg16026015	`PLEKHM2	1	S_Shore	3'UTR	7.14946886623693	8.71143028972296e-13	7.07563421264402	4.03538839597449e-12	2.02564507833932	0.0446182391691857
cg15713086	`C20orf108	20	N_Shore	TSS1500	-7.14848279743955	8.77422432012379e-13	-5.97466885476781	2.84260600193649e-09	-4.54073715685717	9.99156348200713e-06
cg16706559	`CASP9;CASP9	1	Island	TSS1500;TSS1500	-7.14820939079791	8.79171370309455e-13	-5.56212286601826	4.05282053142015e-08	-4.65995240585369	5.95770293804177e-06
cg08364410	`ARRDC5	19	Island	Body	7.14785304085159	8.81456020359049e-13	7.4898906543023	2.36829333215758e-13	1.29637992080478	0.197402589300819
cg25970832	`DSC3;DSC3	18	Island	Body;Body	-7.14775671853537	8.82074566946297e-13	-5.87477445912922	6.97581939620675e-09	-4.12675610098281	5.56285977333514e-05
cg20090162	`TTC7A	2		Body	-7.14773416358743	8.82219468095743e-13	-7.05714636638025	4.56566106855821e-12	-2.05454569278506	0.0416900186375338
cg27294168	`MORN1	1	S_Shore	Body	7.14690030724015	8.87592891686453e-13	6.63828028668024	6.96805997205984e-11	2.78694655339572	0.00594058152077953
cg21695485	`RHOD	11	Island	TSS200	-7.1467839501593	8.88345253491037e-13	-6.25908444534751	7.28353079909548e-10	-3.45127112525548	0.000697708762721986
cg19282973	`C2orf48	2		TSS1500	7.1456983862044	8.95394709351344e-13	5.87633336156381	6.91387261394429e-09	4.11987078986831	5.71799494214646e-05
cg07283778	`ENOSF1;ENOSF1;ENOSF1	18	Island	TSS200;TSS200;TSS1500	-7.14527483451563	8.9816004208968e-13	-5.24911804069781	2.12775393644952e-07	-5.21434435968877	4.73565273282665e-07
cg26666804	`KLHL35	11	Island	1stExon	-7.14515610272531	8.98936734833226e-13	-6.43143622399221	2.5588593624539e-10	-3.14780294940795	0.00193844367417158
cg10008539	`RPL36AL;MGAT2;RPL36AL	14	Island	1stExon;TSS200;5'UTR	-7.14482641739564	9.01096853829158e-13	-6.43324286603523	2.51456550676914e-10	-3.14210006392165	0.00197465392347195
cg26833538	`ALDH3B1;ALDH3B1;ALDH3B1	11		TSS200;TSS200;5'UTR	-7.14290337157968	9.13798669497387e-13	-6.20438369955424	1.01206717232479e-09	-3.53930672497342	0.000511782692617965
cg05212176	`GMNN	6	Island	5'UTR	-7.14277653274748	9.14642596286843e-13	-5.37353896224573	1.10558772174808e-07	-4.99514704194427	1.3209871763143e-06
cg11229273	`ARHGEF3	3		Body	-7.14161558728018	9.22402617152911e-13	-6.69574279607136	2.66604630567612e-11	-2.55167098331693	0.0116516999604802
cg21537245	`PINK1	1	Island	Body	-7.14027039257195	9.31475035926466e-13	-6.21492113168273	9.50101152683366e-10	-3.51552658965664	0.000556798024399158
cg00055617	`CD7	17	N_Shelf	Body	-7.13989057087938	9.34052489834908e-13	-6.23720647000126	5.69571502972195e-10	-3.775692072344	0.000216213306420404
cg24663984	`UBE4A	11	Island	TSS200	-7.13877859962654	9.41638589046158e-13	-5.54333370070894	4.43929902639229e-08	-4.68950647303189	5.23292728795519e-06
cg11391428	`4-Mar	2		Body	7.13866407725586	9.42423310483284e-13	6.0474688029659	2.56543421764677e-09	3.80575384041003	0.000193182428951205
cg21515788	`KPNB1	17	Island	Body	-7.13552431667413	9.6418911278747e-13	-5.24624262511025	2.15653849154622e-07	-5.20360676817395	4.98337254195256e-07
cg06436510	`KIAA1429;KIAA1429	8	S_Shore	TSS1500;TSS1500	-7.13521602040732	9.66352731580109e-13	-5.56863991250264	3.86680491303442e-08	-4.63796759828898	6.55864218220516e-06
cg18333152	`THTPA;THTPA;THTPA;THTPA;THTPA	14	Island	1stExon;5'UTR;5'UTR;Body;1stExon	-7.13352573649713	9.78300067247994e-13	-5.5433483470572	4.43894499031818e-08	-4.67888169225772	5.48311442000815e-06
cg01527159	`	19	Island		-7.13304788253878	9.81703858092657e-13	-6.63802773909863	6.97922743783539e-11	-2.75943803587474	0.00644230590666353
cg01802344	`SCAMP3;SCAMP3;SCAMP3;SCAMP3	1	Island	5'UTR;1stExon;1stExon;5'UTR	-7.13258856753206	9.84986548298234e-13	-6.50881604614106	1.5730215958725e-10	-2.98496108454261	0.00325495506291716
cg26351764	`FAM83D	20	Island	TSS200	-7.13199314661988	9.89258015421757e-13	-6.11567197396953	1.71655088205239e-09	-3.67276397217451	0.000316302525840283
cg21854332	`PDE4DIP;PDE4DIP;PDE4DIP;PDE4DIP	1		Body;Body;Body;Body	-7.13103840277288	9.96145189392976e-13	-6.06066047136536	1.69019073907784e-09	-4.2476327564941	3.41293848829126e-05
cg15650227	`BMPER;BMPER	7	Island	1stExon;5'UTR	-7.13095531682141	9.96746762038606e-13	-6.25189939179822	8.17632584914062e-10	-3.43152658417447	0.000768393344872654
cg11274233	`ATP6V1C2;ATP6V1C2	2	Island	TSS200;TSS200	-7.13078395371663	9.97988619724989e-13	-5.68665233623226	2.01675796515877e-08	-4.42220209653958	1.65423315235331e-05
cg08875094	`CCNC;CCNC	6	Island	Body;5'UTR	-7.12969609187024	1.0059077785446e-12	-6.78199649513651	2.77827123923956e-11	-2.50036254297305	0.0134151042325806
cg10617909	`	5	Island		-7.12966213491451	1.00615596029699e-12	-5.95085924055905	4.50307117791125e-09	-3.95690292585776	0.000108528400823649
cg08846566	`	8	Island		-7.1296224266882	1.00644625267606e-12	-6.95653631158359	8.93461422576044e-12	-2.19744929629363	0.0295044692962868
cg20930060	`QKI;QKI;QKI;QKI	6		TSS1500;TSS1500;TSS1500;TSS1500	-7.12952337107469	1.00717077050379e-12	-5.75281132457443	1.46579337600598e-08	-4.2670653592663	3.15201212693246e-05
cg04225347	`PSMD13;SIRT3;PSMD13;SIRT3	11	Island	TSS200;TSS1500;TSS200;TSS1500	-7.1293703171715	1.00829125205475e-12	-6.150115442414	1.40300892997216e-09	-3.60694315159559	0.000401712846536965
cg11823079	`LOH12CR1;LOH12CR2	12	Island	TSS200;TSS200	-7.12860833103124	1.01388785426232e-12	-4.97135417843989	8.97440502410835e-07	-5.5628736724659	8.69335800303546e-08
cg17634781	`SORBS2;SORBS2;SORBS2;SORBS2;SORBS2;SORBS2;SORBS2;SORBS2	4		Body;Body;Body;Body;Body;Body;Body;Body	-7.12842847576126	1.01521328793958e-12	-6.57365611658907	6.62582222805191e-11	-2.79143795256727	0.00586211730372466
cg04185893	`PTBP2;PTBP2	1	Island	5'UTR;1stExon	-7.12636833706484	1.03051719037348e-12	-5.39753053482228	9.74903286767085e-08	-4.91676762644639	1.89163730096668e-06
cg08058434	`COX4NB;COX4I1;COX4NB	16	N_Shore	Body;TSS1500;Body	-7.1259763514885	1.03345461642999e-12	-6.23673652866012	5.7124451470758e-10	-3.7353425441795	0.00025122851058908
cg24940230	`	11			7.12541003995292	1.03771290669159e-12	6.0038060989491	3.31136107676776e-09	3.85553116925292	0.000160073860035296
cg03470772	`CDS1	4	N_Shore	TSS1500	-7.12372088597921	1.05051677013884e-12	-6.64671982960209	4.09692684366687e-11	-2.57105158797086	0.0110415012266741
cg15674680	`CABLES2	20	Island	TSS200	-7.123284404545	1.0538504466478e-12	-5.57843124029152	3.66513141392747e-08	-4.59673246144882	7.84690385704005e-06
cg13226968	`	11			7.12149583119025	1.06761964631613e-12	7.09927449209026	3.4447355487886e-12	1.92777094809025	0.0558649934664439
cg20166783	`RFC1;RFC1	4	Island	5'UTR;1stExon	-7.12119493219068	1.06995337972829e-12	-5.64245150457635	2.58211906741856e-08	-4.47811051904524	1.30574744744554e-05
cg25407064	`EIF2AK4	15	Island	TSS200	-7.12091960764192	1.07209314663225e-12	-6.13156671666709	1.56225176385763e-09	-3.62256370940887	0.000379672796330535
cg18199495	`PQLC2;PQLC2;PQLC2	1		3'UTR;3'UTR;3'UTR	7.12032009174953	1.07676700152597e-12	7.89150478371959	1.33841112310061e-14	0.536976031655522	0.592776144066224
cg01442844	`	3	Island		-7.11908391090123	1.08646753905248e-12	-5.41274170424171	8.97501254150271e-08	-4.87863585509955	2.24932716338284e-06
cg15246085	`AMT;AMT;AMT;AMT;NICN1;AMT	3		TSS200;TSS200;TSS200;TSS200;3'UTR;TSS200	-7.11782330142223	1.09644808205835e-12	-6.91810517250888	6.60773229203347e-12	-1.78983238111144	0.0756731930878673
cg22860601	`	2	Island		-7.1177571997988	1.0969738994842e-12	-5.94701544178074	4.6042796937933e-09	-3.93961785450774	0.000116026790402134
cg09023840	`RPS9	19	Island	Body	-7.11721175182363	1.10132222093822e-12	-5.21390667278597	2.64730112112973e-07	-5.13423910227816	6.91493401013983e-07
cg13806461	`POLR2L	11	N_Shore	Body	7.11650711426773	1.1069646518315e-12	7.75548568319039	3.58988124619926e-14	0.767662449981569	0.444690750745569
cg05591545	`DTX4	11	Island	TSS200	-7.11548150770547	1.11522798987519e-12	-5.49695316419602	5.70960167518905e-08	-4.72378228100235	4.49863909383404e-06
cg01169073	`C12orf47;MAPKAPK5;MAPKAPK5;MAPKAPK5;MAPKAPK5	12	Island	Body;1stExon;1stExon;5'UTR;5'UTR	-7.11533984562413	1.11637411235646e-12	-5.94182071111167	4.74459079791721e-09	-3.94384419101797	0.000114149198484419
cg11042866	`CFL1	11	Island	TSS1500	-7.11509626395518	1.11834752214908e-12	-6.00746046425195	2.33273136225078e-09	-4.35008571753639	2.23710925171753e-05
cg19436403	`MORG1;MORG1;C19orf56;MORG1;MORG1	19	Island	5'UTR;5'UTR;TSS200;Body;1stExon	-7.11402584998043	1.12706027747476e-12	-6.25455845154514	7.48519327437029e-10	-3.39310457387284	0.000853422312298919
cg25326729	`CPT1C;CPT1C	19	S_Shelf	Body;Body	7.11375503644315	1.12927513160661e-12	7.64112540199474	8.14148514386075e-14	0.962531382720074	0.338104206102053
cg08015382	`	6			7.1129822870403	1.13561858720936e-12	6.07883502640847	1.40715220371976e-09	4.57449593052439	8.63940831019413e-06
cg24664769	`PANX1	11	Island	TSS200	-7.1125897411504	1.13885435360996e-12	-5.15522182340283	3.44805690406794e-07	-5.31684831323884	2.89973324606929e-07
cg05941924	`BTBD11	12		Body	7.1114947760812	1.14792807211385e-12	6.5628183538584	1.12185865397543e-10	2.84775679429742	0.00495503596146267
cg26541741	`AGXT	2		Body	7.1101397126255	1.15925543052627e-12	5.66790736515997	2.23817860897247e-08	4.41339808178666	1.71667037055287e-05
cg06394476	`ACTR2;ACTR2	2	Island	TSS1500;TSS1500	-7.10889767499618	1.1697342727663e-12	-6.08824216389473	2.01853945396854e-09	-3.67423452539907	0.000314605878210204
cg01939883	`IRS2	13	Island	TSS1500	-7.10872647341265	1.17118593853759e-12	-5.54885823319618	4.30768673750623e-08	-4.6191859352848	7.11790942930403e-06
cg11799608	`C4orf10;MFSD10;MFSD10	4	Island	TSS1500;TSS200;TSS1500	-7.10826565546054	1.17510213088073e-12	-5.69969731181479	1.87540336420393e-08	-4.35390320580353	2.20185384357819e-05
cg06607696	`COQ7	16	Island	Body	-7.10695074368119	1.18634749254088e-12	-5.67598571650367	2.13999743909676e-08	-4.39280574210984	1.87166243079116e-05
cg05344066	`TMEM105	17	S_Shore	3'UTR	7.1067636163551	1.18795639837418e-12	6.65945628965613	6.09141915227946e-11	2.66884763011411	0.00837763279621494
cg20931705	`	2			7.10580417395381	1.19623929935737e-12	5.02688499996025	6.6030605442277e-07	5.52807313677262	1.03322653849865e-07
cg15123824	`ELMOD3;ELMOD3;ELMOD3;ELMOD3;ELMOD3;ELMOD3;RETSAT;ELMOD3;ELMOD3	2	Island	1stExon;5'UTR;5'UTR;1stExon;5'UTR;1stExon;TSS200;1stExon;5'UTR	-7.10434934648142	1.20890710214312e-12	-6.49459028834203	1.71884324437313e-10	-2.9529119419064	0.00359552649535217
cg22493078	`AMACR;AMACR;AMACR;AMACR;AMACR;AMACR	5	S_Shore	TSS1500;TSS1500;TSS1500;TSS1500;TSS1500;TSS1500	-7.10416757209045	1.21049911112987e-12	-5.645542721224	1.9497427858638e-08	-5.33918009033365	2.60350498465204e-07
cg01584448	`HEATR3	16	Island	TSS200	-7.10395843333637	1.21233332673687e-12	-6.85661866453365	1.71248537404615e-11	-2.31765063795719	0.0217752851385459
cg07373836	`COMMD2	3	Island	TSS200	-7.1039541618529	1.21237081745581e-12	-6.1828278907413	1.15137927895236e-09	-3.49849347621656	0.000591296323860388
cg06775939	`	14			-7.10363968037678	1.21513414204155e-12	-6.22160161212152	9.1275356964318e-10	-3.42990606939142	0.000751524146809487
cg02477579	`SIN3B	19		TSS1500	-7.10359288393699	1.21554586667183e-12	-6.01897065442788	2.17613181493441e-09	-4.28313285215989	2.95079375058882e-05
cg26888422	`	17	S_Shelf		7.10320531450077	1.21896104747501e-12	6.10103378604893	1.87175593648377e-09	3.64033065818853	0.000355989341963564
cg07150777	`HDAC4	2		Body	7.10285845768068	1.22202545981144e-12	6.0967717466029	1.91946552774129e-09	3.6471002117507	0.000347337178979938
cg08443814	`DFNA5;DFNA5;DFNA5	7	Island	5'UTR;5'UTR;TSS200	-7.10224665110781	1.2274490882043e-12	-6.29845366101288	5.73937323254367e-10	-3.29240825138316	0.00120201203199676
cg06190244	`	17			-7.10210295720224	1.22872634727867e-12	-6.44967013342896	2.27168578703521e-10	-3.02710400668252	0.00285215360120508
cg11587315	`	1	Island		-7.10167313802599	1.23255469208501e-12	-5.89590400162943	6.18036831799973e-09	-3.99673909815898	9.29620027041612e-05
cg12525596	`GOLGA3	12	S_Shelf	Body	7.10097222262067	1.23882277651045e-12	6.41773891868657	3.08071046981029e-10	3.03919697186501	0.00302357497200169
cg15700180	`	18	Island		-7.10093960179813	1.23911525559097e-12	-6.67680267268049	5.59754202391488e-11	-2.51217522050753	0.0134109744847925
cg26410450	`MYOD1	11	Island	TSS200	-7.09961218448997	1.25107456126196e-12	-6.25330376388527	7.54205752417278e-10	-3.36621989671957	0.000935867770665042
cg14551207	`RAN	12	Island	TSS200	-7.09939934586324	1.25300262794113e-12	-5.77470374026441	1.23152044106076e-08	-4.20456050677062	4.06689179010175e-05
cg23898175	`	11	Island		-7.09928890494973	1.25400424090306e-12	-5.60879874971426	3.10255355645594e-08	-4.49509431396479	1.21467141375904e-05
cg10106505	`TAF1C;TAF1C	16	Island	5'UTR;5'UTR	-7.0974748352075	1.27056931892915e-12	-7.2592735305805	1.16694609939565e-12	-1.59889572668783	0.112264250622085
cg04203758	`NETO2	16	Island	TSS1500	-7.09697669747592	1.27515548691435e-12	-6.30074918236347	5.65996981107793e-10	-3.27775164018891	0.00126261495215746
cg16986624	`GNB5;GNB5	15	Island	Body;Body	-7.09696085970092	1.27530156550238e-12	-5.75646811370456	1.36469405247894e-08	-4.23159901480657	3.64366183427919e-05
ch.2.1149235F	`	2			-7.0965405363796	1.27918439383735e-12	-6.33876143599187	3.07293594868157e-10	-3.32190219233917	0.00108817553652885
cg02014125	`CABLES2	20	Island	Body	7.09645264474448	1.27999777715659e-12	7.38051342218762	5.07140850470733e-13	1.38435430247797	0.168800811463673
cg09702105	`HADH	4	Island	TSS200	-7.0950727700636	1.29283439894022e-12	-6.30084296942262	5.68994523674716e-10	-3.27490520178822	0.00127470920085261
cg22558303	`UGGT2	13	Island	TSS200	-7.09417762803885	1.3012291376575e-12	-5.91356036008796	5.58410652243106e-09	-3.95067118580149	0.000111177071678571
cg14398214	`RNF43	17		5'UTR	7.09243152065376	1.31775852908483e-12	6.39173293434317	1.96746708336405e-10	3.42267856269745	0.000770591264514644
cg11125883	`	12	S_Shelf		7.09223048256922	1.31967481599858e-12	5.90116905143685	4.12908150433738e-09	5.11219219441292	7.66860700023061e-07
cg15229026	`UBAC1	9	S_Shore	TSS1500	-7.09219045631772	1.32005667087104e-12	-6.01792279369909	2.1899532544219e-09	-4.25193841021652	3.35340197734883e-05
cg00141143	`BAT2	6	Island	TSS1500	-7.09210724372735	1.32085087521237e-12	-6.20189977583968	1.02723962640378e-09	-3.44116460766502	0.000722699591374538
cg03511931	`ITM2C;ITM2C;ITM2C	2	N_Shore	TSS200;TSS200;TSS200	-7.09203966121757	1.32149624667602e-12	-5.53352067394873	4.68277476906662e-08	-4.61239547725485	7.33119869907982e-06
cg10042319	`NMUR1	2	Island	Body	-7.09185572750107	1.32325426805522e-12	-5.64872448463131	2.48920582594575e-08	-4.41012399775002	1.74046176886489e-05
cg12023693	`RFX8;RFX8	2	Island	5'UTR;1stExon	-7.09150932234944	1.3265714090378e-12	-6.69044091295221	5.00032796135189e-11	-2.58376577367326	0.0106568886726144
cg23788167	`ZFAND5;ZFAND5;ZFAND5	9	Island	5'UTR;5'UTR;5'UTR	-7.09138355627948	1.32777775003588e-12	-5.48890193647904	6.01733780855217e-08	-4.67571008081406	5.56000646055588e-06
cg10442572	`MGRN1;MGRN1;MGRN1;MGRN1	16	Island	Body;Body;Body;Body	-7.09072446146695	1.33411737298826e-12	-5.98876976427464	3.61427808347132e-09	-3.81189528340747	0.000188772215707208
cg19139210	`TASP1	20	Island	TSS200	-7.09059168712996	1.3353980764802e-12	-5.97994819806581	3.80440519244031e-09	-3.82708760273682	0.000178268416890334
cg22476542	`XPC;XPC;LSM3;XPC	3	Island	Body;1stExon;TSS200;1stExon	-7.08917150391367	1.34917244171661e-12	-6.37321627956677	3.63797004549436e-10	-3.13500034073441	0.00202060711488383
cg25151688	`DIS3L;DIS3L	15	N_Shore	TSS200;TSS1500	-7.08899866475774	1.35085829579468e-12	-6.45073071530934	1.47152811752562e-10	-3.02040054674291	0.00291299697431654
cg12782834	`PIGX;PIGX;C3orf34;PIGX;PIGX	3	Island	1stExon;1stExon;TSS200;5'UTR;5'UTR	-7.08344907530371	1.40610079120784e-12	-5.72873613879688	1.59448865315632e-08	-4.25293688122181	3.33973819525092e-05
cg15254736	`ATP2B2;MIR885;ATP2B2	3		Body;TSS1500;Body	7.08248775481029	1.41589276888928e-12	6.44278421127495	2.4669657105346e-10	2.94981177507689	0.00382670651198991
cg19209225	`LZTS2	10	Island	TSS200	-7.08197236129984	1.42117006801502e-12	-6.19083735210506	1.10055806584572e-09	-3.44027154211529	0.000724947726618246
cg18880005	`AFF1;AFF1	4	Island	Body;TSS200	-7.08174958019512	1.42345717313388e-12	-5.8133119159373	9.8999510471995e-09	-4.1012844696615	6.15764215532627e-05
cg19656633	`FLT4;FLT4	5	N_Shore	Body;Body	7.08137169047073	1.42734490795346e-12	5.43931007589519	7.88287108119832e-08	4.99172503010263	1.80639703324762e-06
cg10736770	`FAM83E	19	N_Shore	Body	7.08133724332727	1.42769981833043e-12	6.49524387510455	1.71186259877448e-10	2.90533318056229	0.00416161156363793
cg07518035	`MBOAT7;MBOAT7;MBOAT7;MBOAT7;TSEN34;TSEN34	19	Island	TSS1500;TSS1500;TSS1500;TSS1500;TSS200;TSS1500	-7.08126582482624	1.42843592204054e-12	-5.03196069346572	6.64267516063809e-07	-5.37047305640229	2.23741201845863e-07
cg12022184	`ENTPD5;C14orf45	14	Island	5'UTR;TSS1500	-7.0809747205285	1.43144016050841e-12	-5.61057525561091	3.10244664026619e-08	-4.44414803865016	1.50793945080276e-05
cg12476065	`C7orf49;C7orf49;C7orf49	7	Island	TSS200;TSS200;TSS200	-7.0794859314984	1.44690187018168e-12	-5.61358151206962	3.02197397082996e-08	-4.44675428111074	1.49141476962908e-05
cg06962067	`CA6	1		TSS200	7.07921733911367	1.4497087115299e-12	6.95811749198993	8.80516094279356e-12	2.08984691400453	0.0383370739957663
cg15033250	`	7	Island		-7.07839275038279	1.45835923813996e-12	-6.36118798063964	3.91604766626527e-10	-3.13433139284545	0.0020249874695757
cg11569478	`SYNPO2;SYNPO2;SYNPO2	4		Body;Body;Body	-7.07838798082143	1.4584094212754e-12	-6.32878339348073	2.94432425985477e-10	-3.58918713561725	0.000428226200211926
cg18496502	`MEGF8	19	Island	Body	7.07739253720608	1.46892018379882e-12	6.59082305006468	9.85989734794704e-11	2.64131646076822	0.00940602609665328
cg24906525	`SH3BP4	2	Island	TSS1500	-7.07675578447914	1.47568251289087e-12	-5.56825664674288	3.87491458600677e-08	-4.52067950499701	1.08890114307279e-05
cg00806262	`SNTN	3		Body	7.0766086198192	1.47724974508365e-12	5.9474432745892	4.78295221006847e-09	4.0056372644011	0.000113755940053582
cg05805236	`PCNXL3	11	N_Shore	Body	7.07495878823362	1.49493181325553e-12	6.78354843963366	2.75057538396688e-11	2.38719494991133	0.0181672783537149
cg23646212	`ZNF684;ZNF684	1	Island	5'UTR;1stExon	-7.07420757245848	1.50305160882282e-12	-6.29813317577034	5.75054531391042e-10	-3.23639327791581	0.00144928877363124
cg24344662	`GRTP1	13	Island	Body	-7.07404629108664	1.50480051247098e-12	-5.92477009638391	5.29754162213239e-09	-3.88608975207159	0.000142493489175187
cg00624332	`LDB1	10	Island	TSS200	-7.07341872309804	1.51162475610158e-12	-8.54348761484272	9.79716412438053e-17	0.700292489631565	0.485611559506571
cg22225673	`	1	Island		-7.07339495765814	1.51188377991988e-12	-6.30518241222291	5.5096512746183e-10	-3.2223994680955	0.00151804395406301
cg09924366	`ZFYVE21	14	S_Shore	Body	7.07182700588442	1.52906972494479e-12	6.13628484618389	1.66437316487535e-09	3.5621421810097	0.000554255682626037
cg17213496	`KNDC1	10	Island	TSS1500	-7.07182242321735	1.52912023429765e-12	-5.66667455055822	2.25354210591776e-08	-4.3382428615169	2.34995664959636e-05
cg23196670	`MZF1;MZF1;LOC100131691	19	Island	TSS200;TSS200;Body	-7.07124383818804	1.53551046439539e-12	-6.05701376598861	2.42570946931225e-09	-3.65298673971099	0.000339975018793139
cg27271513	`OXSR1	3	Island	TSS1500	-7.07086592303654	1.53969851726528e-12	-5.84749242620336	8.15172419805666e-09	-4.01942063961676	8.50732543267778e-05
cg03723321	`	7			-7.07004985314991	1.54878046308312e-12	-7.20047478797326	1.74104373448139e-12	-1.64660588493459	0.102011151817181
cg26010175	`PCCB	3	Island	TSS200	-7.06956316959407	1.55422170344635e-12	-7.15128326055574	2.42821899999441e-12	-1.73183443574075	0.0855738403180877
cg25644649	`SPATC1;SPATC1	8	N_Shelf	Body;Body	7.06856887529681	1.56539651775025e-12	6.4301882988635	2.5704972068885e-10	2.99477612776346	0.00315673553868642
cg19618279	`COASY;COASY;COASY;COASY;COASY	17	Island	1stExon;Body;Body;Body;5'UTR	7.06783082408067	1.57374236649313e-12	5.38389624845714	8.01827239815275e-08	6.80691440703583	1.13427768370047e-10
cg01025599	`	16	Island		-7.06741297946052	1.57848667081531e-12	-6.4658870103222	2.05449992928722e-10	-2.92868645431695	0.00387429479365676
cg01804570	`GPR98;GPR98	5	Island	Body;Body	-7.06724252390483	1.58042608965503e-12	-5.85502640526065	7.80896305069763e-09	-3.99890575540523	9.21793709142365e-05
cg02851517	`TXLNA	1	Island	TSS200	-7.06700183261754	1.58316862227663e-12	-6.16698534056566	1.26554542211142e-09	-3.45169672259112	0.000696674330012176
cg09560043	`NAA20;NAA20;NAA20	20	Island	Body;Body;TSS200	-7.06552221132271	1.60013088299338e-12	-6.50577994881318	1.60308926828398e-10	-2.8549569677318	0.00484878516258425
cg21807930	`SLC2A7	1		Body	7.06485508825352	1.60783692427509e-12	6.31491825151846	5.20837859679945e-10	3.18884175959646	0.00169543732872651
cg24943329	`TRNP1	1	N_Shore	TSS1500	-7.06447344985021	1.61226164753346e-12	-6.32970643451515	4.92682825958804e-10	-3.13713500490793	0.00213978608057866
cg21088896	`SGCE;SGCE;PEG10;SGCE;PEG10	7	Island	Body;Body;TSS1500;Body;TSS1500	-7.06381645349523	1.61990687723713e-12	-7.49036335748529	2.36046595830855e-13	-1.12598429736743	0.262661330980298
cg16512727	`RAD51AP1;C12orf4;RAD51AP1	12	S_Shore	Body;TSS1500;Body	7.06378204880786	1.62030821069654e-12	6.35464808780349	4.2333872663459e-10	3.08532369788911	0.00251963535745482
cg16400903	`TPPP	5	Island	TSS200	-7.06333353092344	1.62554914154568e-12	-5.35295892648753	1.23284220914702e-07	-4.87091621494681	2.32931133510961e-06
cg16940199	`C6orf48;C6orf48;SNORD48	6	S_Shore	5'UTR;5'UTR;TSS200	-7.0632410234082	1.62663215870151e-12	-5.37520508768958	1.09586214315402e-07	-4.8317420640942	2.7794781247349e-06
cg07803811	`SLC2A1	1	Island	Body	-7.06235595243868	1.63702983837205e-12	-5.72527813201726	1.70906590082775e-08	-4.18259028889769	4.4449908063293e-05
cg16364152	`RP5-1022P6.2	20	Island	TSS200	-7.06211121207332	1.63991650071627e-12	-5.99083787512932	3.57106480671421e-09	-3.75053562867811	0.000237458024734761
cg26316083	`ITM2B	13	S_Shore	Body	-7.06205257407357	1.64060886510091e-12	-5.68862910347699	1.99469013908542e-08	-4.28005304024782	2.98838521925543e-05
cg21195763	`ABL1	9		Body	7.06110854184585	1.65179501744703e-12	6.78874543199024	1.58717776101401e-11	1.98252185963844	0.0493114052275595
cg20560182	`TAF7	5	Island	TSS200	-7.05980331628594	1.66738440092654e-12	-5.90647576259674	5.81629492219229e-09	-3.89372755681079	0.000138394585253673
cg05876463	`	10	Island		-7.05962971102062	1.66946875716903e-12	-6.3363541204011	4.55755781213566e-10	-3.13999430341107	0.00198818172273468
cg08262876	`LZTS2	10	Island	5'UTR	-7.05942266138105	1.67195799893873e-12	-5.57861374121526	2.84966461264636e-08	-5.39412399630903	1.99446064778501e-07
cg08143046	`NCOR2;NCOR2	12	N_Shore	Body;Body	7.05860215786893	1.68185830770718e-12	5.86723194981662	7.28326235440064e-09	3.96008059690031	0.000107200989166237
cg19600670	`CDC73	1	N_Shore	TSS1500	7.05789526115767	1.69043392209243e-12	6.39818954984663	3.38902191004025e-10	2.97949841401612	0.00362493210632693
cg15922080	`TNXB	6	Island	Body	7.0570991619113	1.70014304730866e-12	5.52359246037611	5.27351254147646e-08	4.48760528065893	1.2540527307791e-05
cg23987548	`GRB2;GRB2	17	Island	TSS200;TSS200	-7.05707616479936	1.7004243286155e-12	-5.56829076955904	3.91869904741617e-08	-4.46735406483718	1.36678513898365e-05
cg09741222	`MRPS27	5	Island	Body	-7.05613625240503	1.71195969163445e-12	-6.16073832148676	1.33161813271237e-09	-3.44156071985839	0.000721704538450318
cg22943243	`STMN1;STMN1;STMN1;STMN1	1	Island	5'UTR;5'UTR;5'UTR;5'UTR	-7.05610577701193	1.71233499228984e-12	-5.76570516447157	1.2955729411735e-08	-4.13297413696604	5.42621685012188e-05
cg21614420	`NT5M	17	Island	TSS200	-7.05578390194162	1.71630377488227e-12	-5.71362071243646	1.73517207097267e-08	-4.22360522734893	3.7641908834489e-05
cg00936449	`	17	Island		-7.05534511360231	1.72172866024537e-12	-6.39554121002907	3.17213983629452e-10	-3.02762065202222	0.00284751316129857
cg26225478	`LPCAT1	5		Body	7.05454365939805	1.73168075915077e-12	6.26621050177665	7.12151189830401e-10	3.24423089533154	0.00151682802436377
cg13319278	`POLRMT	19	Island	TSS200	-7.05444321596718	1.73293199327769e-12	-7.07832213128345	3.98115351005919e-12	-1.83308199862812	0.0689198775348244
cg16141325	`OSGIN2;OSGIN2	8	Island	5'UTR;TSS1500	-7.05434003269693	1.73421828139372e-12	-6.67277370890868	5.59649346304198e-11	-2.53972903767392	0.0120425320406605
cg00379420	`	4	N_Shore		-7.05425952334701	1.73522256568923e-12	-5.96513155952231	3.00883697705011e-09	-4.28737566257753	2.89974760462367e-05
cg24427504	`	12	N_Shelf		-7.0531618403159	1.74897226069565e-12	-5.23464648889038	2.29030649627908e-07	-5.05774036369458	9.88745559379714e-07
cg16083044	`	6			7.0505334855751	1.78233114508437e-12	6.90325626687946	1.26276127105404e-11	2.12811625591548	0.034965729243359
cg18394281	`KLHL32	6	S_Shore	5'UTR	-7.05018299845875	1.78682640284937e-12	-5.67239794628351	2.18742109672372e-08	-4.2827153762583	2.95586271537095e-05
cg11834730	`NCOR2;NCOR2	12	S_Shore	Body;Body	-7.04919754934148	1.79952520245407e-12	-6.0524381492321	1.77678835515065e-09	-4.02571489714793	8.29996420572324e-05
cg09398214	`MARCH10;MARCH10	17	Island	Body;Body	-7.04845426028013	1.80916198509685e-12	-5.27391134569793	1.86721756176247e-07	-4.97942791970184	1.42009050501658e-06
cg19628046	`C18orf21;C18orf21	18	Island	5'UTR;1stExon	-7.04768119015582	1.81923858735571e-12	-6.08971323899515	2.00110317121615e-09	-3.54813510981457	0.000495958138730104
cg25508118	`STEAP3;STEAP3;STEAP3	2	Island	5'UTR;5'UTR;5'UTR	-7.04648824384343	1.83489620085671e-12	-6.28755820386505	6.64870649227865e-10	-3.18804646942487	0.00190223983007215
cg01558660	`CDC37L1	9	Island	Body	-7.04618775501735	1.83886096209158e-12	-6.56604101006211	1.15166961675277e-10	-2.62107318243343	0.00995235686081791
cg19818764	`	14	Island		-7.04617803822977	1.83898930916755e-12	-5.80580219619382	1.03303832517956e-08	-4.04267014338236	7.76504790796841e-05
cg13124370	`GPR125	4	Island	Body	-7.04574468619766	1.84472231236065e-12	-6.23842131325934	8.24962201474219e-10	-3.28360946328672	0.00123806063049406
cg04749935	`NBEAL2	3	Island	TSS1500	-7.0455803995788	1.84690031183521e-12	-5.0201427415651	6.82968134811496e-07	-5.41837106140139	1.77209240691254e-07
cg13722431	`SERPINB9;SERPINB9	6	Island	1stExon;5'UTR	-7.04463556866499	1.85947529055362e-12	-6.34962941290149	4.20281013630834e-10	-3.08647384815635	0.00236212954444875
cg06331674	`AVL9;LSM5;LSM5;LSM5;LSM5	7	N_Shore	TSS1500;5'UTR;1stExon;1stExon;5'UTR	-7.04456740544821	1.86038573218676e-12	-5.78055754057321	8.95504272690619e-09	-4.7794665868092	3.51280724638884e-06
cg15841412	`ING1;ING1;ING1	13	Island	Body;TSS200;TSS200	-7.04429843018465	1.86398264700256e-12	-5.11885569651891	4.15098457810798e-07	-5.24278502494037	4.13590918033587e-07
cg03929569	`	13	Island		-7.04239364377548	1.88965065251165e-12	-5.61989311486294	2.91874547634989e-08	-4.3608488800506	2.13907038570962e-05
cg01497576	`SLC24A5;SLC24A5	15		5'UTR;1stExon	7.04175918284282	1.89827708390041e-12	6.0651577514475	1.53033322910238e-09	4.36609538290081	2.09278768467468e-05
cg10786829	`	13	Island		7.04144315867751	1.90258829923963e-12	6.38806653918085	3.32120283644809e-10	3.01266931959131	0.00298464915999995
cg17894362	`C1orf175;C1orf175	1		Body;5'UTR	7.04132159465581	1.90424923753109e-12	6.82038833926069	2.39275125642531e-11	2.24969637321778	0.0260845079318578
cg10823086	`	1	Island		-7.04118565011765	1.90610834260573e-12	-5.29259959109461	1.69347627199827e-07	-4.93200940825708	1.76463215431719e-06
cg08379517	`LRRC25	19		TSS1500	7.04076096062228	1.91192764626639e-12	6.46623585438171	2.05005885218623e-10	2.87429722728923	0.00457358491114895
cg09746736	`SLC6A2	16	Island	TSS1500	-7.04021676970389	1.91940989583757e-12	-6.16389115481589	1.2890999827826e-09	-3.40307312115113	0.000824615291259409
cg26787539	`CDT1	16	N_Shore	TSS1500	-7.03954855830843	1.92863663786698e-12	-6.20995462136912	9.78830596721088e-10	-3.32099632902472	0.00109151699300242
cg26236440	`CHCHD5	2	Island	TSS200	-7.03954709486989	1.92865689286934e-12	-6.61619173761497	8.01413060542364e-11	-2.60904285776171	0.00992769773007563
cg08688317	`	12			7.03856502011008	1.94229664910063e-12	4.94605283151589	9.87031963993977e-07	5.53406179205445	1.00302361007417e-07
cg26796679	`	22	Island		-7.03728236171489	1.96025370180524e-12	-6.41525567780648	2.80969106264873e-10	-2.95662345232561	0.00355447865993682
cg19589903	`ZNF517	8	Island	5'UTR	-7.03691268197554	1.96545933349138e-12	-6.04703593471509	2.57195361512456e-09	-3.60120072347158	0.000410113655624954
cg13435464	`CKS2	9	S_Shore	Body	-7.03642918104414	1.97228820407601e-12	-5.48166264998343	6.20103999277503e-08	-4.5910696032416	8.04181255016266e-06
cg05147244	`TCFL5	20	Island	TSS200	-7.0361032559005	1.97690463225505e-12	-5.76765289012893	1.28143948867549e-08	-4.08920000240242	6.46058635426721e-05
cg08877672	`BAIAP3	16	Island	TSS1500	-7.03517807080935	1.99006684769439e-12	-6.22838577433861	8.78746683144652e-10	-3.28036460015312	0.00125160674857701
cg15365588	`RPA3	7	S_Shore	5'UTR	-7.03511056061851	1.99103064457052e-12	-6.0009290797954	3.36733632049471e-09	-3.67836897244798	0.000309881627867926
cg21570528	`AK3L1;AK3L1;AK3L1	1	Island	5'UTR;TSS1500;TSS200	-7.03452006270056	1.99948032028722e-12	-5.32735264600318	1.41334718592223e-07	-4.85446745575439	2.50901440235309e-06
cg06801544	`SELK	3	Island	TSS200	-7.03439409678755	2.0012873648124e-12	-6.04102536930419	2.66416698809122e-09	-3.6066525887519	0.000402134003159346
cg19608455	`MAPK4;MAPK4	18	Island	1stExon;5'UTR	-7.03417455693677	2.00444060436787e-12	-5.544291819865	4.41619678864532e-08	-4.47675957272872	1.31326709161601e-05
cg03823904	`SEMA3C;SEMA3C	7	Island	5'UTR;1stExon	-7.03401491837336	2.00673654455636e-12	-5.66674204510075	2.25269833174253e-08	-4.2618374176869	3.2202679383462e-05
cg17225465	`C1orf212;C1orf212;C1orf212	1	N_Shore	TSS200;5'UTR;5'UTR	-7.03375594508879	2.01046661602666e-12	-5.87271921953527	7.05831671404111e-09	-3.90032974224692	0.00013494182979303
cg09605432	`	6	Island		-7.0330545699387	2.02060292198242e-12	-5.56586978124951	3.9786233156354e-08	-4.42143010229556	1.65961967716457e-05
cg03386905	`C5orf45;C5orf45	5	Island	1stExon;1stExon	-7.03274139444407	2.02514512157966e-12	-5.05770821301333	5.84967426817403e-07	-5.22950804567439	4.40608809607958e-07
cg22256960	`	15	Island		-7.03262746936521	2.02679993849993e-12	-7.18903250549748	1.88143295121326e-12	-1.59114898004306	0.114003779935467
cg02951150	`MLF1IP	4	Island	Body	-7.03250160887355	2.02862966518328e-12	-6.14163529832607	1.47161029410746e-09	-3.42651012105846	0.000760427478884845
cg19895882	`KIAA0564;KIAA0564	13	Island	Body;Body	-7.03213340138474	2.03399187741159e-12	-5.72660220664014	1.69651625912667e-08	-4.12181027907278	5.67388312565854e-05
cg13530448	`KIF27	9	N_Shore	5'UTR	-7.03188728970433	2.03758375573302e-12	-6.65036401408154	6.45371321152335e-11	-2.53369847589287	0.012244311966335
cg22872033	`HNRNPC;HNRNPC;HNRNPC;HNRNPC	14		5'UTR;5'UTR;5'UTR;5'UTR	7.03135485241065	2.04537571816805e-12	7.83025716912589	2.09060438500129e-14	0.464803373357342	0.643381807501794
cg13495838	`BRD3	9		TSS1500	-7.03103485054217	2.05007284498397e-12	-6.53413328034307	1.38025779266688e-10	-2.64546412270052	0.0092974812889044
cg09306584	`ZNF493;ZNF493;ZNF493	19		TSS200;TSS200;TSS200	-7.03091986359583	2.05176325620428e-12	-5.41055130934158	9.08049896410071e-08	-4.70457914357389	4.8968053965581e-06
cg13603510	`C19orf29;C19orf29	19	Island	TSS200;TSS200	-7.03049287850115	2.05805229295887e-12	-6.20805420173744	9.9004696666373e-10	-3.30605455521712	0.00114803015084587
cg08327566	`PIK3AP1	10	S_Shore	TSS1500	-7.03021214485792	2.06219750007487e-12	-5.95903118357151	4.29505911635153e-09	-3.7419131792582	0.000245183016787606
cg10941067	`ARSI	5	Island	Body	7.02947914270267	2.07305937910722e-12	7.03854404939486	5.16817735724821e-12	1.84853477326505	0.0666312697049035
cg15072612	`	6	Island		-7.02942222386995	2.07390516612939e-12	-6.10797180715032	1.79655730803436e-09	-3.47929352866197	0.000632581959451016
cg07365857	`SPIRE2	16	Island	Body	7.02876743256333	2.08365943347843e-12	5.90400926147631	5.89931948124238e-09	3.83542669394671	0.00017274063815958
cg20722088	`DUSP6;DUSP6	12	N_Shelf	3'UTR;3'UTR	7.02764937422051	2.10041899883951e-12	6.31283900087865	3.25894293864252e-10	3.46208969560699	0.000671854935635434
cg21937169	`ASL;ASL;ASL;ASL	7	S_Shore	Body;Body;Body;Body	-7.02757835067193	2.10148808869787e-12	-5.22683948227468	2.38485405060306e-07	-5.01980072078423	1.17890672701216e-06
cg09065504	`MAPK14;MAPK14;MAPK14;MAPK14	6	Island	Body;Body;Body;Body	-7.02734554475251	2.10499616920174e-12	-5.02913650695096	6.52901370909988e-07	-5.36581515417039	2.28854387174608e-07
cg15946133	`CXCL13	4		TSS1500	7.0266829173856	2.11501256829245e-12	5.08040250675495	5.04451754861643e-07	5.27463193407654	3.55180005195754e-07
cg09200304	`TFDP1;TFDP1	13	N_Shelf	Body;Body	7.02607241723126	2.12428237214522e-12	8.45811683893378	1.89795391358614e-16	-0.646210348093352	0.519892443093037
cg14948946	`TBRG4;TBRG4;TBRG4	7	Island	TSS200;TSS200;TSS200	-7.02556408609358	2.13203124220006e-12	-6.24340420180941	8.12144908893542e-10	-3.23723488246425	0.00144524734741162
cg09618385	`SLC7A5	16		3'UTR	7.02553503206002	2.13247497109723e-12	7.61516299446397	9.79140361674729e-14	0.830023383083826	0.408643292289143
cg16715692	`GPX4;GPX4;GPX4	19	Island	1stExon;Body;Body	-7.024806516499	2.14363091381887e-12	-5.67991995619777	2.09371233829102e-08	-4.22016196872318	3.81727402448423e-05
cg12046723	`MTHFSD;MTHFSD;MTHFSD;MTHFSD;MTHFSD;MTHFSD;MTHFSD;FLJ30679	16	Island	TSS1500;TSS1500;TSS1500;TSS1500;TSS1500;TSS1500;TSS1500;Body	-7.02426137270558	2.1520162636419e-12	-6.10213578515014	1.31240468499022e-09	-3.81071029934801	0.000189615670967202
cg15082635	`GNB2L1;SNORD96A	5	N_Shore	Body;TSS1500	-7.02302978342888	2.17107907990217e-12	-5.74075609781547	1.4906011664796e-08	-4.10995858647701	5.94859409476794e-05
cg26789283	`RANGAP1	22	Island	TSS200	-7.02291032624271	2.17293685270041e-12	-5.95400042365311	4.42197691842062e-09	-3.73599638345427	0.000250620677495315
cg13962466	`ENTPD6;ENTPD6	20	Island	TSS1500;TSS1500	-7.02271022409536	2.17605229289691e-12	-5.87069911106145	7.14033026248265e-09	-3.88158226744149	0.000144966229975862
cg10101463	`	1	Island		-7.02231761137512	2.18217771466126e-12	-6.40648405648169	2.96565459182917e-10	-2.94180060402562	0.00372102339433029
cg25741646	`OSBPL9;OSBPL9;OSBPL9;OSBPL9;OSBPL9;OSBPL9;OSBPL9	1	Island	TSS1500;TSS1500;Body;5'UTR;Body;Body;TSS1500	-7.02216354380631	2.18458604675821e-12	-5.60401633577426	3.18521473201198e-08	-4.34785386273284	2.25797091716137e-05
cg20667211	`MBLAC2;POLR3G	5	Island	TSS200;TSS200	-7.02111487656478	2.20104786151542e-12	-5.21159692237611	2.58046246862659e-07	-5.03347219970773	1.10662025020567e-06
cg10224037	`ZNF354A	5	Island	5'UTR	-7.02090228691751	2.20439986288673e-12	-5.10203848560221	4.6728809415433e-07	-5.1371065970524	6.82235463790609e-07
cg08872617	`ANKS3;ANKS3;C16orf71	16	Island	1stExon;5'UTR;TSS1500	-7.02083878247905	2.2054021382318e-12	-5.57636003290559	3.70692102393847e-08	-4.39364981876808	1.8650536419353e-05
cg18404009	`	19	Island		-7.01904685509484	2.23386868000325e-12	-5.72296654435454	1.64682600064468e-08	-4.13309898784335	5.42350629533807e-05
cg01040169	`	8	S_Shelf		7.01777011066933	2.25437058164894e-12	6.52580106262381	1.41472808326084e-10	2.7235158372293	0.00715522751370617
cg11744075	`RNF220	1		Body	7.01756731595979	2.25764398972206e-12	8.13960963120528	2.13665110542394e-15	-0.105172214851198	0.916546523100036
cg12658720	`C17orf82	17	Island	TSS1500	-7.01734953445313	2.2611644984426e-12	-5.60279045072054	3.35861213207903e-08	-4.29873923535719	2.767160442384e-05
cg24780865	`MTIF3;MTIF3;MTIF3;MTIF3	13	S_Shore	TSS1500;TSS1500;TSS1500;TSS1500	-7.01665718760136	2.27239231616693e-12	-6.2251669760158	9.11510728789334e-10	-3.24188207048436	0.00152845680433652
cg25037011	`THAP1;THAP1	8	Island	Body;Body	-7.01614959265935	2.28065872774748e-12	-6.37080914920031	3.77343175666563e-10	-2.94367612319542	0.00389852545255698
cg03954393	`	1			7.01483684072499	2.30217450164606e-12	5.33257673622067	1.38863041705674e-07	5.0582810574001	1.34540648892978e-06
cg04232325	`SUSD4;SUSD4	1	Island	5'UTR;5'UTR	-7.01471535493202	2.30417566760117e-12	-5.61341224691547	3.02479067673327e-08	-4.31635827392014	2.57299731187835e-05
cg26256010	`SMG7;SMG7;SMG7	1	Island	TSS1500;TSS1500;TSS1500	-7.01432136649539	2.31067735953088e-12	-6.32751731665584	4.80976642439656e-10	-3.06405904985333	0.00253721017585275
cg09161592	`PANK1;PANK1;PANK1	10	Island	TSS1500;1stExon;TSS1500	-7.01430869736064	2.310886726968e-12	-5.40901899640278	9.15500722061376e-08	-4.67374694943337	5.60812000560935e-06
cg22770592	`USP3	15	Island	Body	-7.01425415518956	2.31178829183047e-12	-5.72405611908423	1.63681578718971e-08	-4.12151884952187	5.68049062341361e-05
cg01800926	`CLSTN1;CLSTN1	1	Island	TSS200;TSS200	-7.01370225722901	2.32093041938588e-12	-5.71592715299309	1.71294992508455e-08	-4.13465165461384	5.38990512833616e-05
cg24076968	`PLEKHN1;PLEKHN1	1	Island	Body;Body	-7.01309340936744	2.33105705421162e-12	-5.92185666207042	5.32368135832154e-09	-3.77252154578697	0.000218788243694789
cg22973042	`AKT2	19	N_Shore	5'UTR	-7.0123113897874	2.34412755729136e-12	-5.73007893528733	1.20019689161224e-08	-4.82537213490589	2.86021062046385e-06
cg19091784	`TREX1;TREX1;TREX1;TREX1	3		5'UTR;1stExon;1stExon;5'UTR	-7.01104689021911	2.36541435887395e-12	-5.33934027162428	1.33557140869976e-07	-4.77408515108635	3.59812841198768e-06
cg08369217	`TLE2;TLE2;TLE2	19	Island	Body;Body;5'UTR	-7.01026294152849	2.37870656841894e-12	-5.43493363566462	7.97117543145991e-08	-4.62016683243872	7.08759767956699e-06
cg09157668	`KIAA1239	4	S_Shore	Body	-7.00970286448003	2.38824776899503e-12	-6.88510660223601	1.42199486743994e-11	-2.07753730133509	0.0394790528278261
cg01310605	`SDK1	7		Body	7.00815622031281	2.4147910175924e-12	6.25377263151415	7.52075851568312e-10	3.18086033901138	0.00174036595619792
cg07504373	`BLOC1S3;TRAPPC6A	19	Island	Body;TSS1500	-7.00753430591023	2.42554558038781e-12	-6.00948389203175	3.20354546455281e-09	-3.60773347983087	0.000400569403072958
cg16040953	`KIAA1908;KIAA1908;PSMG3;KIAA1908;PSMG3	7	Island	Body;Body;TSS200;Body;TSS200	-7.00683635999454	2.43767087737731e-12	-5.78218019808827	1.18317818028124e-08	-4.00345422449267	9.05567303417663e-05
cg13573928	`PALLD;PALLD;PALLD;PALLD	4	Island	5'UTR;Body;Body;Body	-7.0051141644442	2.46784518971819e-12	-7.98222093200796	6.87870324641937e-15	-0.145531521568411	0.884715821018332
cg12026729	`LOC100192426;PTPRM;PTPRM	18	Island	TSS1500;Body;Body	-7.00427436956572	2.48269166792551e-12	-6.02440025271911	2.93635967437585e-09	-3.57501399612908	0.00045056152055131
cg22850066	`RPP21	6	Island	Body	-7.00403346619216	2.48696666946008e-12	-5.70902396364558	1.79886040055719e-08	-4.11974736572192	5.7208131487647e-05
cg23029573	`	15			7.00326760959576	2.50060535352253e-12	6.05221340634263	2.49502514160758e-09	3.52423865875747	0.000539891586910881
cg02190572	`	10	Island		-7.00136217331	2.53485722187894e-12	-5.60889860805944	3.24829413698112e-08	-4.25760799317697	3.27651971369741e-05
cg08856919	`RERE;RERE;RERE	1	Island	Body;TSS1500;Body	-7.00077826365252	2.54544530716314e-12	-5.7456428452498	1.4502765117046e-08	-4.05649569144119	7.35333016112336e-05
cg05058516	`ETFDH;C4orf46	4	Island	TSS200;TSS200	-7.00066984891164	2.5474159699328e-12	-6.31980343133875	5.04104870321995e-10	-3.05003227952884	0.00265277378221439
cg26718479	`HIPK4	19	Island	Body	7.00062866276365	2.54816500571148e-12	6.14888219401198	1.54540178305795e-09	3.3701805342468	0.00105624817902385
ch.1.155695640R	`	1			-7.00042450335168	2.5518811604734e-12	-5.60722867059946	3.72744623954308e-08	-4.20228390698317	4.10459573619094e-05
cg03732087	`AGBL4	1	Island	TSS200	-7.00017984594702	2.55634147024636e-12	-6.58283665437129	9.89154811997663e-11	-2.58806490719526	0.0105295781686976
cg17651693	`HMHA1	19	Island	1stExon	-6.99911936781764	2.57576343393548e-12	-5.64249102499668	2.7351732256084e-08	-4.19006090453003	4.31280609075342e-05
cg07428372	`PPP1CA;PPP1CA;PPP1CA	11	S_Shore	TSS200;TSS200;TSS200	-6.99829587206312	2.59094497155922e-12	-6.17313282708813	1.2439542871552e-09	-3.3063024355665	0.00123778812640863
cg26265657	`ANXA5	4	Island	TSS200	-6.99803746015566	2.59572698235582e-12	-6.15602730086742	1.35090815270673e-09	-3.33174642357712	0.00105247245000925
cg02092098	`CRNKL1;C20orf26	20	Island	Body;TSS200	-6.9976469226464	2.60297045791182e-12	-5.86440863302079	7.40170882933032e-09	-3.84203445800715	0.000168476220471141
cg00176101	`UPF3A;UPF3A	13	Island	Body;Body	-6.99748585707801	2.60596358408791e-12	-5.20392410042704	2.68471849457724e-07	-4.99924107870592	1.29629596456613e-06
cg02619412	`FAM193B;FAM193B;FAM193B	5	Island	1stExon;5'UTR;Body	-6.99623814694298	2.62926476205406e-12	-6.13292376767213	1.60226483283193e-09	-3.38014957346064	0.000968309218594846
cg07519515	`SYNGR3	16	Island	Body	-6.99461552772114	2.65987328050703e-12	-5.1261903935238	4.13544000131551e-07	-5.04605066037611	1.04391976988332e-06
cg24338411	`	21	Island		-6.99400724674855	2.67143750495875e-12	-6.27064603818312	4.62046119513491e-10	-3.24432499936789	0.00141161326611753
cg12801392	`PLXNB1;PLXNB1;PLXNB1	3	Island	5'UTR;1stExon;5'UTR	-6.99385998957746	2.67424446292149e-12	-6.00623370879317	3.26483669787374e-09	-3.58583784934428	0.000433408351595464
cg01162421	`	4			6.99141143091542	2.72134404794821e-12	6.31296372106462	5.66373141001526e-10	3.04162403438358	0.00277601357343065
cg03443427	`ABI3BP	3		Body	6.98921078944158	2.76436828502699e-12	5.7953504292796	1.09835080216471e-08	3.94492444517468	0.000113673936659556
cg14993900	`TFAP2A	6	N_Shore	TSS1500	6.9882089112302	2.78417607964588e-12	5.231936834132	1.82751673295472e-07	7.04483191888268	2.89277415580845e-11
cg03016991	`CORO1C	12	Island	5'UTR	-6.98779118663718	2.79247582502501e-12	-5.69130816452927	1.50054904424841e-08	-4.86139268368552	2.43177987150779e-06
cg13994338	`FBXW5	9	Island	Body	6.9872796643063	2.80267228487667e-12	5.28029186921733	1.40938827318576e-07	6.87489109984429	7.69930278200697e-11
cg00290605	`	22	Island		-6.98726129851914	2.80303905853172e-12	-5.31778259301174	1.4839501740716e-07	-4.77906758211612	3.51906571407625e-06
cg22336806	`SERPINB9	6	Island	TSS200	-6.98638070585579	2.82068026307105e-12	-5.04746043452356	5.95549121063971e-07	-5.25104361430764	3.97604591719165e-07
cg10924779	`CCNT1	12	S_Shore	TSS1500	-6.98617361371817	2.82484479587152e-12	-5.80687444832831	7.67994835948782e-09	-4.5302610819461	1.04510342377323e-05
cg00453349	`SEPT10;ANKRD57;SEPT10	2	Island	TSS200;TSS200;TSS200	-6.98592316650366	2.82988923630495e-12	-6.23792550582462	8.27427837305797e-10	-3.16377183620521	0.00184029136522165
cg04913109	`INPP5A	10	N_Shore	Body	6.98577402196832	2.83289746102081e-12	6.58109679669014	1.00004990875402e-10	2.56204633678798	0.0113213829531364
cg00512404	`ARHGDIB	12		TSS200	-6.98527941555715	2.84289606538402e-12	-6.16916343197737	8.69105415211166e-10	-3.50470623298396	0.0005784873774756
cg10054398	`HIVEP3;HIVEP3	1		5'UTR;5'UTR	6.98514984498049	2.84552108541931e-12	6.69441812029167	2.98558069269484e-11	2.02132884065145	0.0450702226201937
cg19034708	`PCM1	8	Island	TSS200	-6.98445338811134	2.85967164974594e-12	-6.73100756589377	3.85717305387505e-11	-2.2966555974692	0.0229814327836334
cg05576925	`C5orf33;C5orf33;C5orf33	5	Island	TSS1500;1stExon;5'UTR	-6.98431746638375	2.86244133534197e-12	-5.45855961286261	7.02235773994021e-08	-4.52640893360499	1.06250416883878e-05
cg01842867	`	7	N_Shore		6.98414782384722	2.86590184271524e-12	6.4178743752208	2.76470603543737e-10	2.84482034804288	0.00499897379697001
cg01809377	`XRRA1;XRRA1;SPCS2	11	Island	1stExon;5'UTR;TSS1500	-6.98382182393374	2.87256337680381e-12	-6.28972272940077	6.6868723122907e-10	-3.03551833297531	0.00305778810595108
cg10626935	`RBM45	2	Island	Body	-6.98337676346476	2.88168233431321e-12	-6.01502181191249	3.10168942803537e-09	-3.54928344221656	0.000493933898987966
cg24119481	`SLC35E1	19	Island	TSS1500	-6.98329875950954	2.88328349834437e-12	-5.31684897457599	1.54946910644382e-07	-4.70753313739042	4.83341713174036e-06
cg02371802	`DNASE1	16		Body	6.98288415079138	2.89180870205527e-12	5.9303663841959	5.49498509437198e-09	3.78753843188941	0.000251850631297844
cg24475210	`MRFAP1	4	Island	TSS200	-6.98214226286999	2.90712516746201e-12	-6.57274309968294	1.05402062672359e-10	-2.56935851741972	0.0110936441204444
cg15701203	`AKT2	19		3'UTR	6.98165039305645	2.91732377171793e-12	6.61058754049216	4.70727110650746e-11	2.27116940164419	0.024523815518387
cg19708238	`AP3S2;AP3S2;AP3S2	15	Island	5'UTR;Body;1stExon	-6.98160366646381	2.91829444041684e-12	-5.87446671317149	6.9881122149824e-09	-3.79203544663234	0.000203388447322549
cg11874323	`C3orf52	3	N_Shore	TSS1500	6.98125556538005	2.92553564732463e-12	6.0473650444924	1.70641109569973e-09	4.21033259079034	3.9727749795897e-05
cg05364829	`ECE1;ECE1	1	Island	1stExon;5'UTR	-6.98066048790006	2.93795529016519e-12	-6.03240194424097	2.80212573656405e-09	-3.51334306441565	0.000561112488924962
cg21041701	`	12	N_Shelf		-6.98045677414545	2.94221879268863e-12	-6.21461334705242	6.5567535992603e-10	-3.36193928141243	0.000949661289577641
cg16928044	`NUDT17	1	S_Shore	TSS1500	-6.98044338189702	2.94249929001189e-12	-5.81029219901882	7.08012533831205e-09	-5.02425179372579	1.15488395570906e-06
cg27126924	`PRPF19	11	N_Shore	Body	-6.98039747665184	2.94346096300345e-12	-5.81469779012716	9.82245004348744e-09	-3.89434959931298	0.000138065732394159
cg01725383	`RUNX1;RUNX1;RUNX1;RUNX1;RUNX1	21	N_Shore	5'UTR;1stExon;5'UTR;1stExon;Body	-6.97951286248548	2.96205313320878e-12	-6.35840537782467	2.65660418715226e-10	-2.95257607706507	0.00359926237373213
cg14536784	`PDE4A;PDE4A;PDE4A	19	N_Shore	Body;Body;TSS1500	-6.97943995573531	2.96359056022712e-12	-5.41744839938834	9.11845496721369e-08	-4.53301169388359	1.03284653832883e-05
cg18337803	`CACNA1G;CACNA1G;CACNA1G;CACNA1G;CACNA1G;CACNA1G;CACNA1G;CACNA1G;CACNA1G;CACNA1G;CACNA1G;CACNA1G;CACNA1G;CACNA1G;CACNA1G	17	Island	TSS1500;TSS1500;TSS1500;TSS1500;TSS1500;TSS1500;TSS1500;TSS1500;TSS1500;TSS1500;TSS1500;TSS1500;TSS1500;TSS1500;TSS1500	-6.97870467874966	2.97913958053245e-12	-5.75694846133687	1.3610127323013e-08	-3.99214244661152	9.46433659785859e-05
cg01270033	`MKL2	16	Island	TSS200	-6.97778545999271	2.99869100548712e-12	-7.19907766003488	1.75761730988579e-12	-1.46288534588392	0.146019633433262
cg07205460	`MIF	22	Island	TSS200	-6.97752691099226	3.00421287746107e-12	-6.28282376235358	6.30973634524605e-10	-3.0681436535477	0.00250444051047933
cg12640937	`EXT2;EXT2;EXT2;EXT2	11	Island	1stExon;5'UTR;1stExon;5'UTR	-6.97688898408327	3.01787987018054e-12	-6.88648496043127	1.40924020305734e-11	-2.00891053069282	0.0463923751597332
cg27173245	`PANK4	1	Island	1stExon	-6.97655190782613	3.0251260166534e-12	-5.56680002292207	3.91315359481166e-08	-4.31903971802441	2.5446165946427e-05
cg18414021	`CCDC85C	14	Island	1stExon	6.97644424180093	3.0274441120297e-12	5.07398191923525	4.20534900599087e-07	7.54685678508611	1.47772660553301e-12
cg24842889	`KIAA1033	12	Island	TSS200	-6.97617541362759	3.03323970407483e-12	-5.9241194258178	5.25473262170704e-09	-3.69406361676224	0.000292550070719915
cg09814551	`SPINLW1;SPINLW1;SPINLW1	20		Body;1stExon;5'UTR	-6.97512643334423	3.05595861319961e-12	-5.96437997374134	3.02242032878447e-09	-4.05247552248241	7.47085377341747e-05
cg05158854	`BDKRB1	14		5'UTR	6.97510768072329	3.05636627353264e-12	6.77874464845332	1.69778821769105e-11	1.75316506037944	0.0818164432680781
cg25393494	`PLD6	17	Island	TSS1500	-6.97484330384144	3.062119200321e-12	-6.18977192536022	7.65034265743249e-10	-3.41526219313923	0.000790626164775062
cg13954619	`PCBP1	2	Island	TSS200	-6.97450584103086	3.06947793006003e-12	-6.10717935319551	1.804994857135e-09	-3.36987326704895	0.000924243531894474
cg25270788	`RUVBL2;GYS1;GYS1;GYS1	19	S_Shore	TSS200;TSS1500;TSS1500;TSS1500	-6.9739795765601	3.08098829853837e-12	-6.25748870618625	7.35401757495722e-10	-3.10538685121998	0.00222314159312542
cg05127899	`	6			-6.97304743097609	3.10147999848651e-12	-5.44882161601699	5.87928830687015e-08	-5.50186137457351	1.17618247413561e-07
cg13361168	`MIR1539;C18orf32;C18orf32	18	Island	TSS1500;5'UTR;1stExon	-6.97220839641674	3.12003905267432e-12	-6.28993730250208	6.04359020978488e-10	-3.04494524232822	0.00269586854669083
cg03472313	`SERINC3;SERINC3	20	N_Shore	Body;Body	-6.97209652892431	3.12252172267776e-12	-5.74452659179448	1.10396171933365e-08	-4.66412809728035	5.8497239963364e-06
cg13436296	`MPP3;MPP3	17	N_Shelf	Body;Body	6.97201937819163	3.12423505382994e-12	6.0524734855451	2.49122063856377e-09	3.46073085932137	0.000675052251582547
cg12034413	`LONP1	19	Island	Body	6.97174671317752	3.13029767363447e-12	6.33620154928205	5.05439402547603e-10	2.90989840409517	0.00446406081756075
cg17001153	`RASSF5;RASSF5;RASSF5	1		Body;Body;Body	6.97129488278414	3.14036938505223e-12	7.12642316540786	2.87074143663674e-12	1.5771193749609	0.11720847229554
cg14780115	`BAT5	6		Body	6.97120972894501	3.14227109724675e-12	7.9764260659257	7.17879706627926e-15	0.0872756809028005	0.930707594232541
cg05486188	`KCNIP2;KCNIP2;KCNIP2;KCNIP2;KCNIP2;KCNIP2;KCNIP2	10	Island	Body;Body;Body;Body;Body;Body;Body	-6.97095101897651	3.14805571017257e-12	-6.0773856364401	1.53206645475209e-09	-3.70969634582225	0.000276198941354451
cg11957400	`CACNA2D4	12	N_Shore	Body	-6.97090921122933	3.14899148800853e-12	-6.21374635431887	6.59221048862766e-10	-3.33578993626292	0.00103812618124995
cg22459755	`	8	N_Shore		-6.97087410401225	3.14977749936343e-12	-5.11602653951813	4.21113523619797e-07	-5.09958926230622	8.13461451493201e-07
cg23021241	`DMAP1;DMAP1;DMAP1;DMAP1	1	Island	5'UTR;1stExon;5'UTR;5'UTR	-6.9707708670099	3.15208997529367e-12	-5.9303855028814	5.06831195725815e-09	-3.6721768326906	0.000316982343498159
cg14319249	`PTCH1;PTCH1;PTCH1;PTCH1;PTCH1;PTCH1;PTCH1;PTCH1	9	Island	Body;TSS200;Body;5'UTR;1stExon;5'UTR;Body;5'UTR	-6.97072611098615	3.15309301318333e-12	-5.83112743744368	8.94753050214345e-09	-3.84604116454504	0.000165939211101289
cg04605667	`SIAH2	3	Island	TSS1500	-6.97072357186693	3.15314992736864e-12	-5.79558324277177	8.20648388288402e-09	-4.51390270628508	1.12093796406817e-05
cg01037496	`ENOSF1;ENOSF1;ENOSF1	18		Body;Body;Body	6.97044225088435	3.15946196082022e-12	5.76747101361943	1.28275287364905e-08	3.95702941018213	0.000108475267262964
cg02067211	`LOC100133091	7	Island	TSS200	-6.97041041610267	3.16017702162861e-12	-6.36693139302835	3.86394237979275e-10	-2.84768578836022	0.00519542617456177
cg13411948	`SLC8A1;SLC8A1;SLC8A1;SLC8A1	2		Body;Body;Body;Body	6.9700486577752	3.16831385619245e-12	5.20635523203154	2.65125137913805e-07	4.939618220415	1.70435800891567e-06
cg16717267	`SNX20;SNX20;SNX20	16	S_Shelf	Body;Body;Body	6.96988949363181	3.17190035367434e-12	6.0336552878049	2.78164994973436e-09	3.48941304155589	0.00061049668586455
cg21081704	`BRD2;BRD2	6	Island	5'UTR;5'UTR	-6.96863922476455	3.20021186915871e-12	-5.65456169413431	2.41959829497731e-08	-4.14804638347235	5.10816506069007e-05
cg23683012	`TBC1D2B;TBC1D2B	15	N_Shore	Body;Body	-6.96855601104155	3.20210495911587e-12	-5.73531691841837	1.0983175996486e-08	-5.23993061872008	4.19260121421302e-07
cg13537276	`VRK3;ZNF473;ZNF473;VRK3	19	Island	TSS200;TSS1500;TSS1500;TSS200	-6.96758892790106	3.22418654044534e-12	-5.84139560337436	6.27241863843665e-09	-4.37712953615607	1.99856150430511e-05
cg17398851	`PRR24	19	Island	TSS1500	-6.96719494930644	3.23322506689877e-12	-5.55960231559982	3.17164757597514e-08	-5.17155671257955	5.79994792764406e-07
cg24457521	`ATP5E;ATP5E;ATP5E	20	Island	1stExon;5'UTR;TSS200	-6.96430995108627	3.30017311573438e-12	-5.63383719636104	2.7026950139789e-08	-4.17885562446637	4.51251403017197e-05
cg21584461	`LTBP3;LTBP3;LTBP3	11	Island	Body;Body;Body	6.96320592295822	3.3261507331455e-12	7.68821554061724	5.81813352919848e-14	0.576228891365515	0.566047738969958
cg13332130	`RAB4B;RAB4B	19	Island	5'UTR;1stExon	-6.96317140676455	3.32696611796249e-12	-5.57473112803124	3.74011155041808e-08	-4.280144585262	2.98726126196944e-05
cg03148461	`BRAF	7	S_Shore	TSS1500	-6.9631156487685	3.32828371733455e-12	-5.7708842906876	1.25832172437149e-08	-3.93626401681303	0.000117537602602528
cg10341935	`CLTC	17	Island	TSS1500	-6.9628771762991	3.33392476016657e-12	-4.89605914435385	1.29854628850528e-06	-5.36665590497162	2.27923125584745e-07
cg12809842	`PIGX;PIGX;C3orf34;C3orf34	3	Island	TSS1500;TSS1500;5'UTR;1stExon	-6.96237632251181	3.34580294572556e-12	-5.75512530096878	1.45070469479819e-08	-3.93834407344687	0.000116598408640163
cg05361709	`C15orf39;C15orf39	15	Island	1stExon;5'UTR	-6.96164230433695	3.36328583242442e-12	-5.38873158636088	1.01991773596641e-07	-4.6030325370449	7.63540766326982e-06
cg13705251	`HNRNPM;HNRNPM	19	Island	TSS200;TSS200	-6.96133598522235	3.37060822061388e-12	-6.05260906412788	2.48923960759899e-09	-3.4389365345296	0.000728320577524634
cg06008401	`ADAT1	16	Island	TSS200	-6.96056135203489	3.38919521478361e-12	-5.77000763226984	1.26455296778441e-08	-3.93264639971001	0.000119188178122041
cg02997394	`ANKRD27	19	Island	Body	6.96023173608886	3.39713465563153e-12	6.37311309276409	3.78247904410337e-10	2.81518707527011	0.00571685550762838
cg07691484	`TSPAN4;TSPAN4;POLR2L;TSPAN4;TSPAN4;TSPAN4;TSPAN4	11	Island	TSS200;TSS200;TSS1500;TSS1500;TSS200;TSS200;TSS200	-6.9602257184341	3.39727977191905e-12	-5.40825679730666	9.19228951845426e-08	-4.5659552888791	8.96381880112653e-06
cg16027122	`SRCIN1	17	N_Shelf	Body	6.96013035661399	3.39958024234509e-12	5.67511436426558	2.15038249145274e-08	4.09808186406493	6.23658169611638e-05
cg12235144	`COL2A1;COL2A1	12	Island	TSS200;TSS200	-6.95996111128617	3.40366681050771e-12	-5.8182587468454	9.62601445256839e-09	-3.84687279655574	0.000165417185444039
cg08108966	`EEF2	19	S_Shore	TSS1500	-6.95941118851344	3.41697842979741e-12	-5.51480111944328	4.07636772315645e-08	-5.27473296101327	3.5500812909367e-07
cg14053081	`PPAP2C;PPAP2C;PPAP2C	19	N_Shelf	Body;Body;5'UTR	6.95927800225689	3.42021005281895e-12	7.09798318095713	3.49030294889661e-12	1.60702015883432	0.110462631756016
cg22237988	`BAX;BAX;BAX;BAX	19	N_Shelf	3'UTR;Body;3'UTR;3'UTR	6.95882827394726	3.43114439219493e-12	6.69310424941474	5.00762581133256e-11	2.32485992755302	0.0213741094357019
cg19443257	`SPSB4	3	Island	TSS200	-6.95882232131533	3.43128934938594e-12	-5.45337619224956	7.53012136188367e-08	-4.43339097992118	1.57802291063597e-05
cg09990401	`SRXN1	20	Island	1stExon	-6.9583577308095	3.44262149827128e-12	-5.82198940698575	9.42432354975405e-09	-3.83709936519072	0.000171651592470482
cg10482596	`ENOX1	13	Island	5'UTR	-6.95830856018423	3.44382299830581e-12	-5.56690487468719	3.90364945550572e-08	-4.28404833354889	2.93970714933518e-05
cg15251374	`MYST3;MYST3;MYST3	8	Island	TSS1500;TSS1500;TSS1500	-6.95698168665831	3.47640127971456e-12	-5.38972343484545	1.04782013074416e-07	-4.97315570938377	2.50820576694284e-06
cg03062760	`FAM38A	16	Island	Body	-6.95695910236248	3.47695839155994e-12	-7.49297898740566	2.31761258486123e-13	-0.905785851469793	0.36729042761324
cg19079570	`DDX60	4	Island	5'UTR	-6.95657425481563	3.48646531903044e-12	-5.74622506760445	1.4455435065927e-08	-3.96628143596579	0.000104655006971454
cg22135468	`TRMT2A;TRMT2A;RANBP1	22	Island	TSS200;TSS200;TSS1500	-6.9557869224124	3.50599434840296e-12	-5.54962950939259	4.28961677878037e-08	-4.3092361550085	2.64985832206267e-05
cg02291466	`CHPF2	7	Island	TSS200	-6.95514768120997	3.52192897395986e-12	-5.8268065277934	9.16997730520174e-09	-3.82217995627768	0.000181599443975045
cg17328806	`COX11;COX11;COX11;COX11;STXBP4;COX11	17	Island	TSS1500;TSS1500;TSS1500;TSS1500;5'UTR;TSS1500	-6.95484876180453	3.52940460488277e-12	-5.75033829196891	1.4125320529704e-08	-3.95559114598867	0.000109080913744882
cg01458752	`EIF3F	11	N_Shore	TSS200	-6.95470613783122	3.53297694703535e-12	-5.10527893980865	4.4474162388692e-07	-5.08580159066493	8.67588463770307e-07
cg20163959	`ESPNP	1	S_Shelf	Body	6.95397401572235	3.55137049420476e-12	5.7978906196042	1.09722989579152e-08	3.97096946693022	0.000118090305349592
cg06597239	`TCF3;TCF3	19		TSS1500;5'UTR	-6.9526645903005	3.58450240574602e-12	-5.60156595889588	3.22839374321922e-08	-4.21191480042049	3.94734199390994e-05
cg00859352	`TNIK;TNIK;TNIK;TNIK;TNIK;TNIK;TNIK;TNIK;TNIK	3	N_Shore	Body;Body;Body;Body;Body;Body;Body;Body;Body	-6.95137900749405	3.61732580450526e-12	-5.84095642743675	6.28863755136524e-09	-4.32981698336858	2.43354425855906e-05
cg07970400	`DISP2	15	Island	TSS200	-6.95076191294093	3.63318591562279e-12	-6.14938481286216	1.54083155197087e-09	-3.25319472458939	0.00154537154775457
ch.17.458890R	`	17			6.95050386153596	3.63983836196568e-12	6.00895063554956	2.17341723417469e-09	4.17282440993663	4.62363216035601e-05
cg12666727	`HIVEP3;HIVEP3	1	Island	5'UTR;5'UTR	-6.94911767893059	3.67577841371394e-12	-5.82244538372619	9.39995623479199e-09	-3.81765586895823	0.000184722264881004
cg17053415	`NBEAL2	3	Island	TSS200	-6.9489399557459	3.68041139696834e-12	-6.50861871895076	1.61251973296102e-10	-2.50992770187408	0.0134924736374512
cg12866648	`NKX3-1	8	Island	1stExon	-6.94788515599077	3.70802654255109e-12	-6.03088321889038	2.8271342403981e-09	-3.44987135741384	0.000701121107709579
cg17325674	`	10	Island		-6.94730753634961	3.72323487155481e-12	-5.99616336933374	3.46209561877688e-09	-3.50955409244264	0.000568673690916087
cg21461470	`HIST2H2AA4;HIST2H2AA3	1	N_Shore	TSS1500;TSS1500	6.94601666244681	3.75744409557098e-12	6.01430890653417	2.25229013882302e-09	4.09915383043868	7.24700094280542e-05
cg13294509	`GLE1;GLE1	9	Island	TSS200;TSS200	-6.94544187927705	3.77277530305985e-12	-5.14380002120273	3.65539647232763e-07	-4.99959828340303	1.2941629846211e-06
cg06029050	`SPCS2;XRRA1	11	S_Shore	1stExon;TSS200	-6.94491816523739	3.78679773127143e-12	-5.3192103459245	1.47518017396167e-07	-4.68822472986027	5.26251490230067e-06
cg03326059	`FAR1	11	Island	TSS200	-6.94360861831468	3.82208482665562e-12	-5.90259729073576	5.94736652275425e-09	-3.66606964934077	0.000324135685089293
cg16392727	`BMP6	6	Island	1stExon	-6.94348445399143	3.82544724728705e-12	-5.1865571508776	3.0406245299113e-07	-4.84670464014024	2.59840920568306e-06
cg16001460	`PRIM2	6		TSS1500	-6.94238120655044	3.85545128803107e-12	-5.64613992815926	2.52505405656239e-08	-4.11304714105549	5.87580677171259e-05
cg22037798	`C1orf124;C1orf124;C1orf124;C1orf124;EXOC8	1	Island	5'UTR;1stExon;1stExon;5'UTR;TSS1500	-6.94162252008744	3.87621837301837e-12	-6.08885673538115	2.01123712445519e-09	-3.33563330982155	0.00103867847729958
ch.3.3371471R	`NLGN1	3		5'UTR	6.94140665964989	3.88214700950437e-12	6.27447584408471	4.6344013886503e-10	3.18367273164728	0.00184453780762702
cg16087165	`C14orf86	14		Body	6.94139626860935	3.8824326250238e-12	6.29107216845654	6.63291296535996e-10	2.93405465330431	0.00415448803361882
cg25858655	`C2CD2;C2CD2	21	Island	Body;Body	6.93959723522398	3.93219394899944e-12	7.57317002252545	1.31826646517263e-13	0.730214724165852	0.467187777303842
cg14807549	`PRKRA;PRKRA;PRKRA;PRKRA;MIR548N;DFNB59	2	Island	TSS1500;1stExon;5'UTR;TSS1500;Body;TSS1500	-6.93896071267024	3.94994951053089e-12	-5.26380623700815	1.96823278418098e-07	-4.77620393402684	3.56429956341748e-06
cg20215367	`C8orf55	8	Island	TSS200	-6.93878216972904	3.95494400024443e-12	-5.37603972517475	1.09102141105764e-07	-4.57914896815198	8.46745159218319e-06
cg14682878	`ITSN2;ITSN2;ITSN2	2	Island	TSS200;TSS200;TSS200	-6.9383821831763	3.96615554935141e-12	-5.7967377584504	1.08742506284017e-08	-3.84104789761796	0.00016910651571077
cg06476903	`YIF1B;YIF1B;YIF1B;YIF1B;YIF1B;YIF1B	19	S_Shore	TSS200;TSS1500;TSS1500;TSS200;TSS1500;TSS200	-6.9377718340728	3.98332359803218e-12	-5.29913247606413	1.63652045459272e-07	-4.71189407008011	4.74128253903661e-06
cg20887711	`KIAA1530	4	Island	TSS200	-6.93696905375171	4.00601537283905e-12	-5.62852709732997	2.78307064341876e-08	-4.13299396945754	5.425786193685e-05
cg24477401	`ARHGAP27;ARHGAP27	17	S_Shore	TSS1500;5'UTR	6.93694766844759	4.00662158987994e-12	5.18881264866567	2.9021016266362e-07	4.90357200796255	2.00869728298292e-06
cg18961234	`JARID2	6	S_Shelf	Body	-6.93429180286488	4.08261173553187e-12	-5.29480080613078	1.67407405920179e-07	-4.7124636037455	4.72937564276122e-06
cg14831162	`KIFC2;CYHR1;CYHR1;CYHR1;CYHR1	8	Island	TSS1500;1stExon;5'UTR;5'UTR;TSS1500	-6.93402524147917	4.09031621551641e-12	-5.60114587053513	3.23585320388861e-08	-4.1750409555651	4.58249455179976e-05
cg20896738	`POFUT2;POFUT2;LOC642852;POFUT2	21	Island	TSS200;TSS200;TSS200;TSS200	-6.93242566589298	4.13684939153591e-12	-5.20655364144228	2.74428295561211e-07	-4.79206553757242	3.32062583689905e-06
cg26420413	`EVI5	1	Island	Body	-6.93075748271741	4.18593124863565e-12	-5.79598885210714	1.10407010342843e-08	-3.82256779348244	0.000181334072540898
cg10274403	`LRRC50;HSDL1;HSDL1	16	Island	TSS200;TSS200;TSS200	-6.93043206949304	4.19557199520759e-12	-5.62518443797207	2.83485358818965e-08	-4.12566196046365	5.58724094415918e-05
cg21788473	`BCL9	1	Island	5'UTR	-6.92973608510972	4.21626446790888e-12	-5.923264909801	5.28066765687698e-09	-3.60185693675823	0.000409145359521668
cg09389280	`CLDN11	3	S_Shelf	Body	6.92765169614932	4.27883625590556e-12	5.56694242950702	2.88830307937131e-08	5.67331241895306	5.00026378822604e-08
cg14677317	`ARHGEF18;ARHGEF18	19	Island	5'UTR;1stExon	-6.92702468288819	4.29783619452423e-12	-6.16292343086132	1.2965543425597e-09	-3.17637258798658	0.00176610999133859
cg17514420	`MRE11A;MRE11A;ANKRD49;MRE11A;MRE11A	11	Island	5'UTR;1stExon;TSS200;1stExon;5'UTR	-6.92680600305242	4.30448212837467e-12	-5.86765200932701	7.26579824959164e-09	-3.69340902349199	0.000293254279959018
cg24683035	`PPP1R13B	14	Island	TSS1500	-6.92627774510151	4.32057809260527e-12	-5.24852782398257	2.13108507608352e-07	-4.77738868944778	3.54551763333825e-06
cg19275398	`USP43	17		Body	6.92585159528804	4.33360581906819e-12	7.42525293443749	3.71826483158805e-13	0.961711041591711	0.338515151460372
cg15100426	`PNKD;PNKD	2	N_Shore	TSS1500;Body	6.92544520757687	4.34606527160704e-12	5.61655775885855	2.17822086750949e-08	5.49444693274504	1.22000133323188e-07
cg07697428	`ANKFY1	17		Body	6.92517919311573	4.35424002670692e-12	6.26683011568274	6.95066719990537e-10	2.99054722549553	0.00319871584475128
cg22961457	`LIME1;SLC2A4RG	20	Island	3'UTR;TSS1500	-6.92516023846004	4.35482308755523e-12	-7.72370906111038	4.51150645930211e-14	-0.437257001683517	0.663162663324845
cg09888920	`LOC25845;SLC9A3	5	Island	TSS1500;Body	-6.9247143014169	4.36856258294162e-12	-5.45913866496232	7.00053804597914e-08	-4.40512815373773	1.77737520256465e-05
cg14461913	`CAMSAP1	9	Island	TSS1500	-6.92429140330821	4.38163149428931e-12	-6.1796007890341	1.17378710206221e-09	-3.14162954611443	0.0019776692137578
cg08081869	`ITSN2;ITSN2;ITSN2	2	Island	5'UTR;5'UTR;5'UTR	-6.92387196593377	4.39463131374468e-12	-5.81953730579266	9.55642249502218e-09	-3.77181217101313	0.000219368317389704
cg11654006	`ACOT7;ACOT7;ACOT7;ACOT7	1	S_Shelf	3'UTR;3'UTR;3'UTR;3'UTR	6.92276309344991	4.4291815047329e-12	7.13870449259249	2.64302879541905e-12	1.45766936227112	0.147455233088505
cg21080246	`ZDHHC20	13	Island	Body	-6.92241327577233	4.44013625563222e-12	-5.41140526920611	9.435304080863e-08	-4.43028415863457	1.5988393499699e-05
cg07996838	`DOCK4	7		Body	-6.92226112821306	4.44490913228568e-12	-6.71084743654847	2.69319272295969e-11	-1.79187365845006	0.0753426505538665
cg11248330	`	6			-6.92173016118371	4.46160503112006e-12	-5.79444066847077	1.1016446325016e-08	-3.81147357498718	0.000189071974044989
cg10874102	`LCLAT1;LCLAT1	2	Island	TSS200;TSS200	-6.92062500202438	4.49655340541153e-12	-6.52983184018045	1.37951733644291e-10	-2.52043442598504	0.0126987722917209
cg15849440	`RASSF8;RASSF8	12		TSS1500;TSS1500	-6.91906946339468	4.54619919075193e-12	-6.26466843062282	7.04203734422042e-10	-2.98200760584414	0.00328505494348909
cg12796186	`PGD	1	Island	TSS1500	-6.9181427437404	4.57603090459285e-12	-5.9797662397266	3.80842780354809e-09	-3.47944278760672	0.000632250839672889
cg18254123	`	15	Island		-6.91807067722173	4.57835879820288e-12	-5.98577619332416	3.77160545411409e-09	-3.46854757802929	0.000656852563641546
cg15014577	`TNXB	6	Island	Body	-6.91765627326379	4.59176742821529e-12	-6.45352280204756	1.44531864982252e-10	-2.49930683790981	0.0134537573302312
cg07138101	`ADSL;ADSL	22	Island	TSS200;TSS200	-6.91657338119992	4.62698793826237e-12	-5.40160711069434	9.52386354306859e-08	-4.48952846030968	1.24382412899465e-05
ch.10.7089384R	`	10			-6.91636670245175	4.6337400904353e-12	-5.61498850963507	3.32032462510544e-08	-4.05822323434635	7.3033708395597e-05
cg01244034	`	16	Island		-6.91633071131999	4.63491690037588e-12	-5.39192821039307	1.00273055017209e-07	-4.50600155496296	1.1594346197612e-05
cg09706512	`CGGBP1;CGGBP1	3	Island	TSS1500;TSS1500	-6.91567018290016	4.65656644442653e-12	-6.21682504198417	9.39307681274209e-10	-3.05899650276397	0.00257837370517605
cg10361005	`	7	N_Shelf		6.91475584608307	4.68669850106857e-12	5.94260572391763	3.22452350319269e-09	4.78562045242608	4.42525473863195e-06
cg15952045	`ITGA9	3		Body	6.91393649155026	4.71386273550727e-12	6.64090567515718	6.85299977714548e-11	2.31227613924034	0.0220786399727635
cg05264411	`BAT2L2	1	S_Shore	5'UTR	-6.91370698832068	4.7214991345523e-12	-5.03833815855773	6.23464428091147e-07	-5.12039141374375	7.37944799372244e-07
cg25254074	`MDFI	6	S_Shore	Body	6.91352301599666	4.72762931192443e-12	5.85105308191153	5.56436250081737e-09	4.64372173908777	6.39594354574412e-06
cg27456203	`WWP2;WWP2	16		Body;Body	6.91333491493055	4.7339051305019e-12	6.6898712809359	3.0772851497987e-11	1.81906371641791	0.0710519470513171
cg02746684	`LOC220729	3		Body	6.91188569483167	4.78253163744972e-12	5.97033962316888	4.3834394235216e-09	3.486685561259	0.000616377031915448
cg02675466	`KIAA0556	16		Body	6.91097975220784	4.81317759958777e-12	7.34465032480915	6.49673898199002e-13	1.07296299801206	0.285733153710904
cg25670688	`ACSL5;ACSL5;ACSL5	10		Body;Body;Body	6.91074352592802	4.82120018270378e-12	6.14519274309214	1.57935723923249e-09	3.16895751972762	0.00202049453004744
cg11196904	`APITD1;APITD1;APITD1;APITD1	1	S_Shore	Body;5'UTR;1stExon;Body	-6.90982819728116	4.85241003892724e-12	-6.80674304145415	2.36753194227787e-11	-2.01334837529775	0.0459161581886796
cg23057051	`MC1R	16	N_Shore	TSS200	6.90955751725519	4.86167726727657e-12	5.66104042924111	1.68805942075718e-08	5.2841822547087	3.39284532797489e-07
cg03107988	`GPRIN3;GPRIN3	4	Island	5'UTR;1stExon	-6.90929016494779	4.87084759484628e-12	-5.03281944761574	6.40961625138938e-07	-5.12115105639581	7.35319975050398e-07
cg14558114	`THNSL2	2	Island	TSS200	-6.90896663329445	4.88196758080353e-12	-5.99196194159944	3.54778927305432e-09	-3.43955386553542	0.000726759091155363
cg13556659	`FUT4	11	Island	TSS200	-6.90872156377545	4.89040733457036e-12	-6.02937489572966	2.85218701423928e-09	-3.37349132814524	0.000912864549447419
cg11973052	`SOCS1	16	Island	5'UTR	-6.90826326042214	4.90622887765286e-12	-4.98986819208173	8.25399205294267e-07	-5.08516142789362	8.70184629618681e-07
cg19434433	`WNT3	17	Island	Body	-6.90776394196343	4.92352345663089e-12	-5.57242358553784	3.78762489005743e-08	-4.17238869635858	4.63176008418054e-05
cg18574403	`ENGASE	17		TSS200	-6.9077310868639	4.92466353111217e-12	-7.85430341360663	1.75539476101983e-14	-0.17321581755332	0.862986396164653
cg09375034	`TUBAL3	10		Body	6.90673433192203	4.95937428368307e-12	5.74129251865937	1.50193586051416e-08	3.86925832041095	0.000151936374145838
cg09755784	`	4	N_Shelf		-6.90660786902658	4.96379530447962e-12	-5.84556806314312	6.12034581532499e-09	-4.18269657092611	4.44308340870287e-05
cg03698765	`POP4;POP4	19	N_Shore	TSS1500;TSS1500	-6.90554041604944	5.00126668159848e-12	-5.86534045369335	5.447169066457e-09	-4.12367448836986	5.63178957899096e-05
cg15588258	`ST6GALNAC1	17		Body	-6.90464324396922	5.03297493931691e-12	-6.43781441675758	1.59894915433888e-10	-2.50468037883831	0.0132580400222293
cg26915536	`PAOX;PAOX;PAOX	10	Island	TSS1500;TSS1500;TSS1500	-6.90410389697896	5.05213153311736e-12	-5.69841277359159	1.88888294892096e-08	-3.94420129147603	0.000113991882359489
cg08047376	`CTNNA2;CTNNA2	2	Island	TSS200;TSS200	-6.90299969606877	5.09157389230994e-12	-5.90325805364923	5.92483454069308e-09	-3.58297183476409	0.000437889524949198
cg25605545	`	17	Island		-6.90282077101087	5.09799349832586e-12	-6.7489418676738	3.43756957685588e-11	-2.10050834261379	0.037370973936514
cg03628897	`C21orf33;C21orf33;C21orf33;C21orf33	21	Island	1stExon;1stExon;5'UTR;5'UTR	-6.90247372405246	5.11046773316356e-12	-5.52210328480244	4.98240706315115e-08	-4.24990301134308	3.3814216105035e-05
cg11789595	`EIF6;EIF6;EIF6	20	Island	TSS200;TSS200;TSS200	-6.90235187017812	5.11485473428473e-12	-6.18005566503924	1.17060300038937e-09	-3.09656324347667	0.00228701749393125
cg00626843	`RFX7	15	Island	TSS1500	-6.9013379803947	5.15150036771599e-12	-5.31390095617822	1.57353165836651e-07	-4.55356076492103	9.45554340005883e-06
cg02257681	`DDAH2;DDAH2	6	Island	1stExon;5'UTR	-6.90119284461431	5.15676711047442e-12	-5.39942625823397	9.71712858910703e-08	-4.45030507824587	1.46918082029603e-05
ch.8.143138149R	`	8			-6.90060285403894	5.17823130465541e-12	-5.64298232778737	3.07291034185022e-08	-3.97298104188558	0.000101968864942397
cg01684248	`	16	N_Shelf		6.90022926010191	5.19186812281939e-12	6.94041882060071	9.89382994682728e-12	1.75970647485161	0.0806915584623409
cg18677965	`DDX27	20	S_Shore	Body	-6.89984007095016	5.20611162851915e-12	-5.42527133885303	8.8408724932316e-08	-4.35544524265356	2.18776431285049e-05
cg06993118	`FBN2	5	Island	TSS1500	-6.89907593817202	5.23418879898508e-12	-5.05657800652008	5.6885672614189e-07	-5.05890297047916	9.83415325926812e-07
cg11542281	`NCOA2	8	Island	5'UTR	-6.89827013753256	5.26395778963634e-12	-5.49730904720104	5.69862648447284e-08	-4.28487422678122	2.92973969192584e-05
cg21830413	`VPS26A;VPS26A	10	Island	Body;Body	-6.89803543719244	5.27265957487423e-12	-5.08881463329827	4.83441720762761e-07	-5.00030719705816	1.2899399046483e-06
cg13506288	`PWWP2B;PWWP2B	10	S_Shelf	3'UTR;Body	-6.89785063580202	5.27952121958177e-12	-5.65001901415075	2.47143705404367e-08	-4.01639604048796	8.60871428485511e-05
cg25417223	`NFIX	19	Island	3'UTR	-6.89696623319361	5.31248030130676e-12	-5.50886185279031	4.21368233742391e-08	-5.10446444660079	7.95118052084727e-07
cg06233503	`KCNQ1;KCNQ1	11	Island	Body;Body	-6.89683522767927	5.3173796098979e-12	-7.8174800518713	2.29363533044845e-14	-0.21576514302774	0.829797603365582
cg08390254	`ATP1A2	1		TSS1500	6.89668413313067	5.32303570235106e-12	5.93818424384694	5.25462800722805e-09	3.57073163900914	0.00053817663269287
cg07001481	`DERL2;MIS12	17	Island	TSS200;TSS1500	-6.89612369296635	5.34406684054004e-12	-6.61434532500109	8.13645154006748e-11	-2.32543819706692	0.0213422131119134
cg18301624	`ELP2;SLC39A6;SLC39A6	18	Island	TSS200;TSS1500;TSS1500	-6.89609500479889	5.34514558428402e-12	-6.06413745896593	2.32629792076769e-09	-3.28709063248775	0.00122367972208886
cg13893799	`	9			6.89589093147428	5.35282539131287e-12	6.85419367701725	1.99358863704607e-11	1.64641053756196	0.103713806535903
cg20463945	`C6orf136;C6orf136;C6orf136	6	Island	Body;1stExon;Body	-6.89507271284082	5.38372583621299e-12	-5.93817242148461	4.84561600888837e-09	-3.50578779523701	0.00057628426868306
cg14761923	`KIAA1530	4	S_Shelf	Body	6.89475505686194	5.39576933398077e-12	7.68769296584239	5.83992096088396e-14	0.439026068939307	0.661884983542878
cg23309360	`	19	N_Shore		-6.89456319047165	5.4030564771506e-12	-5.54535907941643	3.43574875554941e-08	-4.99422152853896	1.3266317642472e-06
cg23100411	`SDCBP2;SDCBP2	20	Island	TSS200;Body	-6.89421009513759	5.41649236365283e-12	-5.04971196192205	5.88847245364317e-07	-5.06111785955159	9.73337638821933e-07
cg22125754	`SLC29A2	11	N_Shelf	Body	6.89414869498954	5.41883208530988e-12	7.83390948962031	2.03589819253353e-14	0.18155091873962	0.856463790444444
cg17414873	`SDF4;SDF4	1	N_Shore	Body;Body	6.89340430241637	5.44727692889191e-12	7.03286469519054	5.36722404489499e-12	1.58391928430694	0.115646425544008
cg27518898	`IL10RB	21	N_Shore	TSS1500	-6.89287908883528	5.46743447675296e-12	-6.0982720354847	1.90253728137624e-09	-3.22077910406322	0.00152619780385077
cg20648939	`RNMT;C18orf19;C18orf19	18	Island	TSS200;TSS200;TSS200	-6.89278699927675	5.47097637347196e-12	-5.71474904290749	1.72426597176662e-08	-3.89273618769375	0.000138920224912826
cg14743702	`ECHDC3	10	N_Shore	TSS1500	-6.89212546251314	5.49648621813965e-12	-5.57220931221568	3.79206652593038e-08	-4.1412092391095	5.25017137664709e-05
cg13430450	`ABCA1	9	S_Shore	TSS1500	6.89212147504445	5.49664033380961e-12	6.37261599365456	2.22456790117282e-10	2.76989805808498	0.00624716902024075
cg01000073	`USP14;USP14	18	Island	Body;Body	-6.89197903190446	5.50214854034684e-12	-6.30177702870948	5.6247651995916e-10	-2.86231048317582	0.00474241839596189
cg22259283	`PLS1	3	Island	TSS200	-6.89082540794036	5.54695840568416e-12	-5.91116945177922	5.75633716220317e-09	-3.59647901433172	0.000461110646100358
cg11644478	`PSMG1;PSMG1	21	Island	TSS200;TSS200	-6.89025794031081	5.56913143232111e-12	-5.82098336650501	9.47830405963824e-09	-3.70145223284495	0.000284711272530386
cg14064399	`LMNB1;LMNB1	5	Island	1stExon;5'UTR	-6.89025285478345	5.56933053462358e-12	-4.79710253227987	2.0401645809682e-06	-5.49584347119978	1.21162809829232e-07
cg14654194	`C1orf109	1	Island	TSS200	-6.89010216985349	5.57523313238786e-12	-5.86982002717975	7.17630919290828e-09	-3.61554927379645	0.000389425257550527
cg24826892	`DHCR7;DHCR7;DHCR7;DHCR7	11	Island	1stExon;1stExon;5'UTR;5'UTR	-6.88996344743193	5.5806725578342e-12	-6.06960220422089	2.2943407291495e-09	-3.27138033792476	0.00138825808334977
cg01450803	`	4	S_Shelf		6.88977368820149	5.58812160534616e-12	6.20912091092128	6.27162356872055e-10	3.32479627516571	0.0010775638804243
cg21919445	`DYNC1H1	14		Body	-6.88900362433094	5.61845080895977e-12	-6.48546732730572	1.17909430782275e-10	-2.32321020095847	0.0214653353580934
cg01815035	`XPR1;XPR1	1	Island	TSS200;TSS200	-6.88833177890284	5.64504339090557e-12	-6.20881930007684	1.00528895511353e-09	-2.98372562415571	0.00345118267041415
cg07869308	`TBC1D22A	22	Island	TSS200	-6.88829689985795	5.64642731565444e-12	-5.16439679875858	3.28978946791251e-07	-4.84819552855838	2.58100500220132e-06
cg08798701	`RPL32P3	3		TSS200	-6.88774549536575	5.66835008315654e-12	-5.81977928050454	7.12108078647655e-09	-4.19901066497199	4.15939144458044e-05
cg09983708	`BCAR1;BCAR1;BCAR1;BCAR1;BCAR1	16	Island	Body;5'UTR;Body;5'UTR;Body	-6.88686259421922	5.70362636135363e-12	-5.89349884303079	6.26624937092832e-09	-3.56751424002078	0.000462818867558518
cg24095088	`MRPL18;TCP1;TCP1	6	Island	TSS1500;TSS200;TSS200	-6.88600905038978	5.73793419175332e-12	-6.43384904871738	2.50516740708628e-10	-2.61880167683233	0.00965837525687614
cg23657252	`BMP2K;BMP2K;BMP2K;BMP2K	4	Island	5'UTR;1stExon;5'UTR;1stExon	-6.88589595735682	5.74249506609505e-12	-5.6520636632587	2.44362316583129e-08	-3.98869080371676	9.59248777546794e-05
cg00548889	`	1			-6.88565187322044	5.75235073073638e-12	-5.85378513049404	7.8644524961472e-09	-3.6346715073675	0.000363377674595025
ch.19.1528169R	`ZC3H4	19		Body	-6.88558111555134	5.75521089245406e-12	-5.88968355577525	4.79444655362487e-09	-3.93012668989177	0.000120350801098893
cg14017402	`	2			-6.88551519031712	5.75787697209633e-12	-6.2920147814856	4.04008352425352e-10	-2.85903396139957	0.00478954693046406
cg21937244	`CDC42BPB	14	Island	Body	-6.8853736277414	5.76360598941658e-12	-7.31933414379618	7.73340612205835e-13	-1.06566337200022	0.289014440001695
cg15181396	`PAFAH1B3;PRR19;PAFAH1B3;PAFAH1B3	19	S_Shore	TSS200;5'UTR;TSS200;TSS200	-6.88512762542527	5.77357496129299e-12	-5.76233562470352	1.00301685666579e-08	-4.31285514968978	2.61053182993566e-05
cg27441058	`	12	Island		-6.88496771172669	5.78006434859837e-12	-5.35189280129798	1.28939509049911e-07	-4.45874558315254	1.41759940679777e-05
cg06570931	`NHLRC1	6	Island	TSS200	-6.88480995178228	5.7864733403024e-12	-5.18600479773088	3.04923480674253e-07	-4.73389095746336	4.30178052289171e-06
cg26798367	`ZNF77	19	Island	TSS200	-6.88348213384293	5.84069263033169e-12	-5.45716700276186	7.07510441327671e-08	-4.32538622280218	2.47863427822423e-05
cg24265969	`ERC2	3		3'UTR	-6.88296651564109	5.86188101245477e-12	-6.44015200133053	1.5782232037417e-10	-2.43268144159847	0.0161028371354836
cg18575406	`ANKRD16;ANKRD16;ANKRD16;FBXO18	10	S_Shore	TSS1500;TSS1500;TSS1500;Body	-6.88296542135107	5.86192606030518e-12	-5.6509301334008	2.4590050324995e-08	-3.98476419906735	9.74027923781408e-05
cg19897251	`MRPL15;MRPL15	8	Island	5'UTR;1stExon	-6.88286945015272	5.86587815767508e-12	-5.65537299950684	2.39924945253999e-08	-3.97678420920358	0.000100473318024112
cg01777187	`HMGN1	21	Island	TSS1500	-6.88266527084047	5.87429495915921e-12	-5.60629717975791	3.14552804656788e-08	-4.06238000751555	7.1844814488038e-05
cg06520003	`ACSF2	17	S_Shore	Body	-6.88215652332688	5.89531837708311e-12	-5.09530046376898	4.67822847417798e-07	-4.95690033520553	1.57476584877346e-06
cg05097643	`PAQR4	16	Island	TSS1500	-6.88199702029658	5.90192483146436e-12	-5.85253921913449	5.87424198243686e-09	-4.08929914686477	6.45804408137752e-05
cg20515206	`AGXT	2		Body	6.88132053626081	5.93002485592898e-12	6.64791725556667	6.57799295441263e-11	2.23692168951444	0.0267382577716484
cg23672752	`DYNC1LI2	16	Island	TSS200	-6.88024357498092	5.97503080129271e-12	-5.3802937622154	1.06666933160026e-07	-4.45357566300204	1.44898334939971e-05
cg12502342	`SEC61A2;SEC61A2;SEC61A2;SEC61A2;SEC61A2;SEC61A2;SEC61A2;SEC61A2	10	Island	5'UTR;Body;5'UTR;1stExon;Body;1stExon;1stExon;5'UTR	-6.87845401944307	6.05055727909439e-12	-4.9472516839929	1.01063461694709e-06	-5.118012136558	7.46224964069289e-07
cg00319692	`ATP6V0D2	8		TSS200	6.87811294767423	6.06505767263241e-12	5.92818207909432	5.13311824871836e-09	3.48907531823983	0.000611221942008204
cg08550065	`HYAL3;NAT6;NAT6;HYAL3	3	Island	5'UTR;5'UTR;1stExon;1stExon	-6.87748105760503	6.09201202784627e-12	-5.60774129570459	3.26892185798624e-08	-4.01940655791762	8.5077948273163e-05
cg09456297	`CYP1B1	2	Island	TSS1500	-6.87657033560768	6.13106709220164e-12	-6.18147401596564	1.20124147002368e-09	-3.01313744863126	0.00315326652770805
cg01534423	`	17	Island		-6.87641642754014	6.13769142314257e-12	-6.76002061321841	3.20109327149367e-11	-2.02781418965027	0.0443925543541991
cg15684811	`JUN	1	Island	TSS1500	-6.8752738603448	6.18708827601403e-12	-6.11247887671741	1.7492964243948e-09	-3.16035747136501	0.00186088276345017
cg01717331	`MED8;MED8;C1orf84	1	Island	TSS200;TSS200;TSS200	-6.87464463380042	6.21445791357831e-12	-5.49864358335143	5.65765248991639e-08	-4.23486436188722	3.59549670036789e-05
cg24132006	`AKAP11;AKAP11	13	Island	1stExon;5'UTR	-6.87303767471009	6.28489586931607e-12	-4.83360462022702	1.71062649310704e-06	-5.39713535368083	1.96543300781621e-07
cg05591235	`ACOT7;ACOT7;ACOT7;ACOT7	1		Body;Body;Body;Body	6.87297667024095	6.28758524161739e-12	6.07214287549047	2.29838922313005e-09	3.2249382259283	0.00161483323462943
cg27225570	`DUSP15;TTLL9;DUSP15;DUSP15;DUSP15	20	Island	TSS1500;TSS1500;TSS1500;1stExon;5'UTR	-6.87247296256802	6.30983425928423e-12	-5.81146913281497	1.00039266512489e-08	-3.68224025605657	0.000305518796177402
cg25386411	`	1	Island		-6.87244118638431	6.31124041344933e-12	-6.4661878033897	2.05067002290835e-10	-2.53474948014819	0.0122089301821918
cg16106770	`ARHGEF12	11	Island	TSS1500	-6.87224079768761	6.32011505699025e-12	-5.58973186770577	3.44506672570433e-08	-4.07037725738255	6.96091535511216e-05
cg26355502	`DUSP10;DUSP10	1	Island	TSS1500;TSS1500	-6.87213418288813	6.32484170549215e-12	-5.19538661872456	2.80958242649343e-07	-4.75812259469464	3.86314387735225e-06
cg16642299	`MIR200C	12		TSS1500	-6.8718458603482	6.33764152410033e-12	-5.66878642673634	1.70734359364066e-08	-4.57769650467806	8.52077175921889e-06
cg04356362	`TRABD	22	Island	TSS200	-6.87164447520234	6.34659689058762e-12	-6.20729329304978	9.94573018314992e-10	-2.98686725135205	0.00323566328615706
cg22652561	`MAP2K4	17	Island	TSS200	-6.87143423712667	6.35595916814827e-12	-5.16976524169062	3.20046863211327e-07	-4.80476195635813	3.13724746687353e-06
cg18586851	`COMMD7;COMMD7	20	S_Shore	TSS1500;TSS1500	6.87111872971148	6.37003468092168e-12	6.73292165745829	3.81009775185492e-11	2.06461686310244	0.0407088630191394
cg02770745	`STIM1	11		Body	-6.87045564199134	6.39971619242173e-12	-6.64763679108071	4.07215829820197e-11	-1.80987391644251	0.0724789838748219
cg01411982	`THYN1;THYN1;THYN1;ACAD8;THYN1;THYN1	11	Island	TSS200;TSS200;TSS200;TSS200;TSS200;TSS200	-6.86985533602368	6.42670430320742e-12	-6.23263898196611	8.54169579774374e-10	-2.938837599535	0.00375515977513877
cg01960970	`	19	Island		-6.86852511630616	6.48690537262709e-12	-5.50501284869497	4.30505650411409e-08	-5.0301438072781	1.12381271830147e-06
cg26421181	`FBF1	17	Island	TSS200	-6.8684782767435	6.48903520848055e-12	-5.67169484893711	2.19161322403422e-08	-3.9191411707006	0.000125546637224103
cg18515171	`HEATR6	17	Island	TSS200	-6.86846677891279	6.48955812964455e-12	-5.396942896068	9.76332987776853e-08	-4.40063427587403	1.81122047943108e-05
cg06828043	`SHANK2;SHANK2	11		Body;Body	6.86795647362376	6.51280844431716e-12	6.60015871467078	9.68352513888569e-11	2.28634934930686	0.023778022689968
cg02730492	`COL4A1	13		Body	6.86750060142273	6.53364772626564e-12	6.75658261286417	1.97051835766122e-11	1.49342831176196	0.137828606779365
cg25931580	`PDHX;PDHX;PDHX;PDHX;APIP;PDHX	11	Island	5'UTR;5'UTR;1stExon;1stExon;TSS200;1stExon	-6.86732381674567	6.54174665499983e-12	-5.83616717044781	8.69471590656683e-09	-3.62856589704124	0.00037151070649858
cg13080626	`KCNC4;KCNC4;KCNC4	1	Island	TSS1500;TSS1500;TSS1500	-6.8664355818551	6.58258795497163e-12	-5.12842144373567	3.98162550735001e-07	-4.85018466053428	2.55795980790185e-06
cg09328497	`PPDPF	20	Island	TSS200	-6.86622991754998	6.59208002867721e-12	-5.16503062015389	3.27911960078316e-07	-4.80255845116322	3.16835600644287e-06
cg04898316	`SEPT10;ANKRD57;SEPT10	2	Island	TSS200;TSS200;TSS200	-6.86595353815844	6.60485696061102e-12	-5.58732281049984	3.49087521121281e-08	-4.06191295381501	7.19774730865013e-05
cg17697835	`SEPT9;SEPT9	17		TSS200;Body	6.86504623049275	6.64697235519601e-12	6.31626254793175	3.1887338001318e-10	2.86692627359905	0.00467674336645468
cg23660805	`PRKCD;PRKCD	3	Island	TSS200;TSS200	-6.86379125229137	6.7056599671323e-12	-6.75205630433388	3.36941310874766e-11	-2.01629723005426	0.0456020209654117
cg18644191	`LPPR4;LPPR4	1	Island	1stExon;1stExon	-6.86317861602335	6.73449335108123e-12	-5.98507047171452	2.49269022644412e-09	-4.00134617098807	9.13053588892135e-05
cg05704639	`MED8;MED8;MED8;MED8;C1orf84	1	Island	1stExon;5'UTR;5'UTR;1stExon;TSS200	-6.86296806108347	6.7444310287696e-12	-5.6289309204356	2.7768774306321e-08	-3.98296866519932	9.80857947490958e-05
cg18150885	`RAP1GAP;RAP1GAP;RAP1GAP	1	Island	5'UTR;TSS1500;5'UTR	-6.8629613510018	6.74474796437268e-12	-5.84613007739217	8.21525092170728e-09	-3.60230292484765	0.000408488495822188
cg06311422	`DST;DST;DST;DST;DST	6	N_Shore	Body;Body;Body;Body;Body	6.86250379901431	6.76639386741214e-12	5.84293785300338	5.83847493828361e-09	4.48864222342099	1.24852765899501e-05
cg17466946	`MXD3;MXD3	5	Island	TSS200;TSS200	-6.86154973470513	6.81174801532853e-12	-5.55796601429694	4.28738587846296e-08	-4.07117641124339	6.93894264681188e-05
cg05336156	`PHLPP1	18	Island	TSS200	-6.86096688767363	6.83960175121025e-12	-5.41277571026244	8.97338426901053e-08	-4.35775337409715	2.16683638274556e-05
cg08049060	`TMEM115	3	Island	TSS200	-6.86059042613076	6.85765180681012e-12	-5.2332418902869	2.31047710063191e-07	-4.66868199703579	5.73411551807609e-06
cg23387384	`	17	Island		-6.86038216222627	6.86765740262848e-12	-6.2524706499061	7.85599393026972e-10	-2.83366879956013	0.00541475685434494
cg24355850	`LOC400752	1	Island	TSS200	-6.85971807804491	6.89965754736764e-12	-5.34149000224771	1.30980776253218e-07	-4.48016526131295	1.2943895834792e-05
cg18781240	`WASF3	13	Island	TSS200	-6.85867566005511	6.95018334291296e-12	-5.41787829820585	8.73228396689354e-08	-4.34418764889032	2.29264515050194e-05
cg20742009	`LAMP3	3	N_Shore	Body	-6.85812873974178	6.97683730478396e-12	-5.77798546976913	9.09018454615136e-09	-4.22830101087617	3.69293455923679e-05
cg25349276	`LIMCH1;LIMCH1;LIMCH1;LIMCH1;LIMCH1	4		Body;Body;Body;TSS1500;TSS1500	6.85806849070767	6.9797796375484e-12	6.10503150017952	1.30582427847753e-09	3.6185983225947	0.000456332937969115
cg13049960	`	2	Island		-6.8575065510009	7.00728125474662e-12	-5.56529855837343	3.93806456297202e-08	-4.08346739253283	6.60921570546999e-05
cg25278669	`ZBTB3	11	Island	TSS1500	-6.85702637814123	7.03086527575401e-12	-5.27505433364358	1.92650795914406e-07	-4.53217347563894	1.03656696658077e-05
cg26342671	`LIMS2;LIMS2;LIMS2	2	Island	Body;Body;5'UTR	-6.85654724150103	7.05447593008596e-12	-5.81412410873798	9.8544595526007e-09	-3.64545270859076	0.000349424422995163
cg06395091	`DYNLRB2;DYNLRB2	16	Island	1stExon;5'UTR	-6.85414442778812	7.17405741281882e-12	-5.97456666881314	3.92514612184088e-09	-3.35942088914389	0.00095786473756469
cg21184320	`KIF17;KIF17;KIF17;KIF17	1	Island	5'UTR;1stExon;1stExon;5'UTR	-6.85404721668023	7.17893692238387e-12	-5.62805923647275	2.79026276645226e-08	-3.96649604948466	0.00010456792677696
cg22416596	`	22	S_Shore		6.85389663393848	7.18650184156168e-12	5.32502240258891	1.10614117736532e-07	6.24223704437829	2.57810745410975e-09
cg18823846	`PRKG1;PRKG1;CSTF2T	10	Island	Body;Body;TSS1500	-6.85163367206167	7.30113292127168e-12	-5.38667257391287	1.03113932932977e-07	-4.3846680455582	1.93654031229788e-05
cg03732185	`BICD1;BICD1	12	Island	TSS1500;TSS1500	-6.85111957720324	7.32742327153809e-12	-4.84519657804834	1.61716271162928e-06	-5.332594019951	2.68766394414214e-07
cg08116199	`PCMTD2;PCMTD2	20	Island	TSS200;TSS200	-6.8509370322976	7.33678075443342e-12	-5.02438519762886	6.89840633398493e-07	-4.93659752245888	1.72804447690353e-06
cg08043233	`GTF2A1;GTF2A1;GTF2A1	14	Island	5'UTR;1stExon;5'UTR	-6.85086670618265	7.34038888392367e-12	-5.09370131322419	4.71627907897634e-07	-4.89656701651145	2.07365591279637e-06
cg01843524	`C15orf37;ST20	15	Island	Body;TSS200	-6.85081184206005	7.34320493264733e-12	-5.175944668287	3.10055864726846e-07	-4.75232078974395	3.96405850197065e-06
cg06892635	`CCDC42;CCDC42	17	Island	TSS1500;TSS1500	-6.8506490941691	7.35156463551014e-12	-5.50724697264909	5.40029051792337e-08	-4.17136882414471	4.65083844967244e-05
cg21656428	`C20orf26;CRNKL1	20	S_Shore	5'UTR;Body	-6.85018493583641	7.37545783755349e-12	-5.07121331389802	4.42724816436634e-07	-6.19998806211946	3.23398177593772e-09
cg13579901	`DCAF6;BRP44;BRP44;BRP44;DCAF6	1	Island	TSS1500;5'UTR;TSS200;TSS1500;TSS1500	-6.85009798939278	7.37994198240369e-12	-6.71387592610976	4.30471921125588e-11	-2.05558025361378	0.0415883086493516
cg07265873	`DDR1;DDR1	6	N_Shore	TSS1500;5'UTR	-6.85003106422423	7.38339537666073e-12	-5.17621666995988	3.12351743076936e-07	-4.7314774169175	4.34801283271423e-06
cg04080067	`ELK4;ELK4;ELK4;ELK4	1	Island	1stExon;5'UTR;1stExon;5'UTR	-6.84980181803841	7.39523667680574e-12	-5.25889936128725	2.01917426523875e-07	-4.60490060751662	7.57375805209753e-06
cg22431861	`	8	Island		-6.84948516396728	7.41162348477438e-12	-5.01266587659403	7.31285781100425e-07	-4.95324283346392	1.60137054001445e-06
cg05394500	`ADRA2C	4	Island	TSS200	-6.84907533494951	7.43288492003851e-12	-5.70386743121234	1.83977329044737e-08	-3.82163309639423	0.000181974249002035
cg01349267	`ASB7;LINS1;LINS1;ASB7;LINS1;LINS1	15	Island	TSS1500;TSS200;TSS200;TSS1500;TSS200;TSS200	-6.84843255414595	7.46635204952324e-12	-5.2759864033819	1.91720381620226e-07	-4.51396809632073	1.12062455148779e-05
cg03651427	`ZNF777	7	Island	5'UTR	-6.84701988292859	7.54042413815645e-12	-5.44099885722607	7.71635519244393e-08	-4.28014896036978	2.98720755607641e-05
cg21952313	`ZNF821;ATXN1L	16	Island	TSS1500;Body	-6.84671582837424	7.55646087406974e-12	-5.43880964408692	6.2130950471987e-08	-5.15173614368477	6.36843616443389e-07
cg02132003	`ANAPC11;ANAPC11;ANAPC11;ANAPC11;ANAPC11;ANAPC11;ANAPC11;ANAPC11;ANAPC11;ANAPC11;ANAPC11;ANAPC11;ANAPC11;THOC4	17	Island	1stExon;5'UTR;5'UTR;5'UTR;5'UTR;5'UTR;1stExon;5'UTR;1stExon;TSS200;1stExon;1stExon;1stExon;TSS1500	-6.84649970171492	7.56788034929583e-12	-5.14846640500975	3.69310411315734e-07	-4.72196403025131	4.53495838693692e-06
cg25478527	`CEP57;FAM76B	11	Island	TSS1500;TSS200	-6.84632793620398	7.57696797512022e-12	-5.02104659843153	6.79887055561383e-07	-5.01473974537695	1.20680949225063e-06
cg13825663	`STARD7	2	Island	1stExon	-6.84602801253643	7.59286172954594e-12	-5.75606753196566	1.36777147021777e-08	-3.72597424354247	0.000260091976232372
cg21612054	`CCNDBP1;CCNDBP1;CCNDBP1;CCNDBP1	15	S_Shore	TSS200;Body;Body;Body	-6.84507121195096	7.64378380245137e-12	-6.08617583657324	2.04328187988574e-09	-3.1455125990555	0.00195291174155788
cg01861537	`	11			-6.84481585565489	7.65743064838534e-12	-6.49975264863248	1.07277279897719e-10	-2.15073017674828	0.0330959355913873
cg01894743	`RAB6B	3	Island	TSS200	-6.84473751081766	7.66162236627447e-12	-5.38466401733578	1.04220129959401e-07	-4.37427321638653	2.02255513792102e-05
cg23684807	`C20orf160	20	Island	Body	-6.8440685665326	7.69750486360005e-12	-5.88824663126239	4.46024292265802e-09	-4.26639143645681	3.1607324716122e-05
cg02602699	`	17	Island		-6.84344645387326	7.73102304416013e-12	-5.62550564319374	2.82983720942753e-08	-3.94958135992471	0.000111646543551619
cg24857238	`PGAM5;PGAM5;PGAM5	12	Island	TSS200;TSS200;TSS200	-6.84302572608859	7.75377203448368e-12	-5.35716571483763	1.2057258198522e-07	-4.41901134164963	1.67660558962049e-05
cg27428208	`	2			6.84290715745071	7.7601949469181e-12	7.13844227772859	2.65985140067911e-12	1.30188045878005	0.195515610028928
cg03772064	`	7			-6.8428345674936	7.76412974770507e-12	-6.37887755715157	2.33114672705729e-10	-2.48594958041227	0.0139514453510172
cg07809166	`	16	N_Shelf		6.84184593560989	7.81791441020811e-12	7.15425280594	2.38006698685618e-12	1.26714730749466	0.207656588308364
cg08500017	`GDAP1;GDAP1	8	Island	TSS200;TSS200	-6.84145035862972	7.83953714952006e-12	-4.84657850341458	1.61560726424449e-06	-5.28838050647426	3.32517813847155e-07
cg19565262	`NAT8	2		TSS1500	6.84035747562101	7.89958057193645e-12	5.71247432540637	1.77215864551917e-08	3.88709804016663	0.000161568658209386
cg03860250	`MICAL2	11		5'UTR	6.8392269715215	7.96216503225007e-12	6.23813230669518	8.26398548137654e-10	2.8674090339041	0.00466992261660788
cg09908986	`KRAS;KRAS	12		TSS1500;TSS1500	-6.83897050185973	7.97643060628372e-12	-5.93920417592851	4.82816926631333e-09	-3.39078141528624	0.00086026948572822
cg11694418	`DHRS3	1	Island	TSS1500	-6.83844544074548	8.0057141677235e-12	-5.27832434814175	1.82469606191147e-07	-4.54794271334034	9.68687947727987e-06
cg00192031	`	7	N_Shore		6.83841708260978	8.00729874455462e-12	6.18155049106073	7.45112129294615e-10	3.2355390607925	0.00145340149220894
cg05291025	`NEU2	2		TSS1500	6.83807991835532	8.02616214645539e-12	5.52080889743363	5.01752945646595e-08	4.12223907616792	5.66417446160135e-05
cg03712341	`AGXT2L2	5	Island	Body	-6.837663428613	8.0495237111272e-12	-5.73761854994797	1.51706492679821e-08	-3.74142911706444	0.00024562365954689
cg23204968	`HOXA5	7	Island	TSS1500	-6.83715854091121	8.07793300994693e-12	-5.99457471712742	2.5210916718361e-09	-3.5539783690738	0.000485738284203532
cg13880786	`C12orf52;DDX54;DDX54	12	Island	TSS1500;TSS200;TSS200	-6.83701119188247	8.08624263018276e-12	-5.29784903889531	1.65012351629244e-07	-4.50822429855238	1.14847817597106e-05
cg02733444	`INPP5A	10	Island	Body	6.83596002647706	8.14576567737642e-12	7.32362648702289	7.50853322691909e-13	0.958435145640209	0.340159412296479
cg15690092	`PAFAH2	1	Island	TSS1500	-6.83592251173164	8.14789789385032e-12	-5.33406435037272	1.36427427862194e-07	-4.44271010160497	1.51713168748713e-05
cg24448952	`PAXIP1;LOC202781	7	Island	TSS1500;Body	-6.83555340531763	8.16890588743918e-12	-5.40663982497219	9.27187072492039e-08	-4.31722804589248	2.56375848497028e-05
cg03695433	`SDK2	17		3'UTR	6.83511963224039	8.19366227933604e-12	6.99201831684938	7.03828243337641e-12	1.53789903786772	0.126546023054747
cg02636704	`DPM1;MOCS3	20	Island	TSS200;TSS200	-6.83481182368296	8.21127417275945e-12	-5.23785906826168	1.84590796028907e-07	-5.68343905829728	4.75122082632405e-08
ch.3.2133154F	`IFT57	3		Body	-6.83438572844533	8.23571530593936e-12	-6.16682992734701	1.62020179738567e-09	-3.08875625903614	0.00234494135409569
cg04670377	`	20	Island		-6.8337262163645	8.27368601642317e-12	-5.27128167693638	1.89301057979701e-07	-4.55076299313773	9.57007566716508e-06
cg00449189	`	22	N_Shore		-6.83348797109932	8.28744486714154e-12	-5.79907043936521	8.03838853504614e-09	-4.09496542571863	6.31432293262149e-05
cg25038283	`MYO5A;MYO5A	15	Island	Body;Body	-6.83322863122499	8.30244743285241e-12	-5.47152555038719	6.54923565004036e-08	-4.19882174376056	4.16257532272624e-05
cg00212988	`GPR120	10	Island	TSS200	-6.83272613145443	8.33159234045947e-12	-5.81242392664232	9.94992208186439e-09	-3.60036664647826	0.0004113475156659
cg13097573	`	17	Island		-6.83241524227304	8.34967403529589e-12	-5.69377376397491	1.93835304731039e-08	-3.80767958445187	0.000191789150648999
cg05779148	`LIMCH1;LIMCH1;LIMCH1;LIMCH1;LIMCH1	4	Island	Body;Body;Body;Body;Body	-6.83203139841561	8.37205191289815e-12	-6.8476838934918	1.81505181571482e-11	-1.78462084016224	0.0765225038046408
cg01287218	`RETNLB	3		TSS200	6.831823966298	8.38416953517746e-12	5.99465891061274	3.79831380760701e-09	3.30141744439807	0.00132254289756039
cg13301676	`MCC;MCC	5		Body;Body	6.83141755693547	8.40796070788056e-12	6.00143814795237	3.35736511354034e-09	3.26646951793839	0.00131118718688683
cg07696310	`MAP1LC3B;FBXO31	16	Island	Body;TSS1500	-6.83121191336288	8.42002425776007e-12	-5.33681184878459	1.34252210374612e-07	-4.43084483966116	1.59506326361058e-05
cg12154538	`NCOR2;NCOR2	12	Island	Body;Body	-6.83098608484979	8.43329144328972e-12	-6.85834839867542	1.69329673585375e-11	-1.76382155967128	0.0799904192439478
cg01910419	`MIR219-1	6	N_Shore	TSS1500	6.83049644225528	8.46212781686479e-12	5.29040751311658	1.71301442868497e-07	4.51072705737972	1.13626059327824e-05
cg26630773	`FCHO1;FCHO1	19	Island	TSS200;TSS200	-6.82963074219889	8.51334781611913e-12	-5.93209721616272	5.01851902491569e-09	-3.38438751426814	0.000879380438179829
cg26313976	`HEG1	3	N_Shelf	Body	-6.82868455475067	8.56967739576301e-12	-5.63812503671142	2.63944443805172e-08	-3.89767901519951	0.000136318148274637
cg23054440	`	19	Island		-6.8278487329258	8.61974021466719e-12	-5.72200107789859	1.65574577603071e-08	-3.74899562636002	0.000238820649520443
cg04497547	`METTL10	10	Island	TSS200	-6.82761124914664	8.63401686700232e-12	-5.47638098920923	6.38015232221562e-08	-4.17897771782229	4.51029115899595e-05
cg15128470	`LIAS;RPL9;LIAS;RPL9	4	Island	TSS1500;5'UTR;TSS1500;TSS200	-6.82748145499967	8.6418294030722e-12	-5.43010346726545	8.17993150387003e-08	-4.25981945441537	3.24699081536056e-05
cg10837265	`DHDDS;DHDDS;DHDDS;DHDDS	1	Island	1stExon;5'UTR;1stExon;5'UTR	-6.82679165274643	8.68346616981922e-12	-5.85772428595622	7.68967079614014e-09	-3.50900107830969	0.000569785234309872
cg04181321	`ZNF71	19	Island	5'UTR	-6.82666082519029	8.69138512310791e-12	-5.86272404434754	7.47327440333407e-09	-3.49997477494069	0.000588218385141173
cg05096436	`AGAP1;AGAP1	2	Island	Body;Body	-6.82635545317863	8.70989674449717e-12	-5.5594753938864	4.06531470768841e-08	-4.03081677075468	8.13542456558772e-05
cg19400055	`BAT2	6	Island	TSS1500	-6.82522440824017	8.77879769918544e-12	-5.55370029976272	3.27860126837332e-08	-4.76298526231674	3.78047854203259e-06
cg19592502	`SEMA3C	7		Body	6.82463207956164	8.81509393591216e-12	6.58327488486592	1.07622974868582e-10	2.22837023372806	0.0275143462120376
cg20728496	`NADSYN1	11	N_Shore	TSS1500	-6.82388966801971	8.86079451741733e-12	-5.55616255356113	3.23356235446127e-08	-4.7520355445655	3.96908502246744e-06
cg10689438	`GMPS	3	S_Shore	Body	6.82264979338659	8.93763549380577e-12	6.27855808443746	4.05066168063727e-10	2.84473203855517	0.00500030064480496
cg15691775	`TSGA14;TSGA14	7	Island	1stExon;5'UTR	-6.82216713103757	8.967724614046e-12	-7.95619590637921	8.33123540766521e-15	0.178004864010136	0.859237563976368
cg12201164	`C20orf3;C20orf3	20	Island	5'UTR;1stExon	-6.82189995724954	8.98442285061573e-12	-5.32352666418686	1.49920027920916e-07	-4.38136721406163	1.9634664485817e-05
cg12597276	`SRFBP1	5	N_Shore	TSS200	-6.82162458511267	9.00166535971053e-12	-5.69919876568753	1.88062381470102e-08	-3.77639885023845	0.000215643217403383
cg17352422	`TGM2;TGM2	20	S_Shore	TSS1500;TSS1500	-6.82115250015786	9.03130056553966e-12	-5.19319180601269	2.83741166697233e-07	-4.66224836158198	5.89809646404312e-06
cg01061890	`TXNDC11	16	Island	TSS200	-6.82069867859793	9.05987938908334e-12	-6.25297585766178	8.01285534452963e-10	-2.72853877298448	0.00755325715565785
cg18426054	`PRKG1;PRKG1;CSTF2T	10	Island	Body;Body;TSS1500	-6.8204394488443	9.07624378809696e-12	-5.43971598192495	7.76958493772694e-08	-4.2287638438938	3.68598152903055e-05
cg09799039	`HDAC4	2		Body	6.8203848216018	9.07969593506851e-12	6.19715545037681	1.05683945104054e-09	2.90120371119753	0.00421439786344194
cg07085497	`WFDC3;DNTTIP1	20	Island	TSS200;1stExon	-6.81992095068879	9.10906196336082e-12	-5.30868106712572	1.55903836865048e-07	-4.45486107312892	1.44111853000728e-05
cg19827148	`GLTPD1;CPSF3L	1	Island	5'UTR;TSS1500	-6.81978353249554	9.11777927596964e-12	-5.34389430410787	1.29329653355523e-07	-4.39537255156117	1.85163471887399e-05
cg23117191	`MMP28;MMP28	17	Island	1stExon;1stExon	-6.81902067942164	9.1663207465134e-12	-5.75338150164971	1.38858181486035e-08	-3.67618683768803	0.000312366657209882
cg01512638	`SNORD12B;C20orf199;SNORD12C;MIR1259;C20orf199;ZNFX1;C20orf199	20	S_Shore	TSS1500;Body;TSS200;TSS1500;Body;TSS1500;Body	-6.81898340831587	9.16869883838654e-12	-6.18376530066597	1.14494896528631e-09	-2.92184286580021	0.00395655297008971
cg06116271	`DYNLL1;SFRS9	12	Island	TSS1500;Body	-6.817454779606	9.26675588826958e-12	-5.01588773918595	6.97654730568358e-07	-4.96552127598128	1.51373887752723e-06
cg04187846	`	14	N_Shore		6.81718436005244	9.28420914423093e-12	6.75443294704129	3.65118276527387e-11	1.91209765243115	0.0581389507360861
cg03091337	`ZNF528;ZNF528	19	Island	5'UTR;1stExon	-6.81703289930183	9.29399869934739e-12	-5.56743259964155	3.89240694801157e-08	-3.99806053115841	9.24839311570885e-05
cg19956940	`CREB1;CREB1	2	Island	TSS200;TSS200	-6.81594917293913	9.36434023112648e-12	-5.14064798927236	3.84287114531803e-07	-4.67572907176995	5.55954296836459e-06
cg09934894	`	14	Island		-6.81579175485439	9.37460107070871e-12	-8.20391624499092	1.31828007404998e-15	0.625011030909136	0.533665157701558
cg20095609	`GPC6	13		Body	-6.81567805435539	9.38201915730927e-12	-5.9124727730075	4.12016945562108e-09	-3.72144359614165	0.000264483649196587
cg08445687	`PLEKHF1	19	N_Shore	TSS1500	-6.81523587313331	9.41092280616093e-12	-6.35672082894001	2.68392328105536e-10	-2.46584170675014	0.0147315474373958
cg26792687	`	16	S_Shelf		6.81480352118583	9.43926829948048e-12	7.11490412260699	3.10178969035751e-12	1.28154221722829	0.20255961696439
cg26212877	`	17	Island		-6.81439379895146	9.46620734676977e-12	-6.2059010860179	1.00290657756522e-09	-2.87378800030346	0.00458064436770332
cg26310429	`SLC39A11;SLC39A11	17		Body;Body	6.81405152748284	9.48876926936043e-12	7.54756313826397	1.57935232296581e-13	0.521768664695564	0.603285689964863
cg07776285	`	4			6.81312685416088	9.54998583183934e-12	6.04142740312137	2.65789960780749e-09	3.15947980223878	0.00186621015816094
cg10706989	`C13orf34;C13orf37;C13orf34	13	Island	5'UTR;TSS200;1stExon	-6.8123951445229	9.59870161397912e-12	-5.7430776197279	1.48698411919031e-08	-3.67748805986534	0.000310882564664627
cg09279404	`LOC728855;LOC728855;LOC728875	1	Island	Body;Body;Body	-6.81194004098797	9.62912422643251e-12	-4.76718171296264	2.44681827948019e-06	-5.24696522811691	4.05422699451283e-07
cg03036777	`TRIM62	1	S_Shore	TSS1500	6.81184395652788	9.63555931624444e-12	6.29985384587684	3.53922976640543e-10	2.73258976546804	0.00696870782464735
cg07338058	`GOLSYN;GOLSYN;GOLSYN;GOLSYN;GOLSYN;GOLSYN;GOLSYN;GOLSYN;GOLSYN;GOLSYN;GOLSYN;GOLSYN;GOLSYN;GOLSYN	8	Island	TSS200;TSS200;5'UTR;5'UTR;5'UTR;TSS200;5'UTR;5'UTR;5'UTR;5'UTR;5'UTR;5'UTR;5'UTR;5'UTR	-6.81149639622808	9.65887176715037e-12	-5.45000683481081	7.35243492702472e-08	-4.19268352231297	4.26729864748547e-05
cg13704403	`DGKQ	4	Island	TSS200	-6.81089348545763	9.69944287242399e-12	-5.82051530397857	9.50352117436126e-09	-3.54213267433817	0.000506666415880359
cg05378938	`TDRD5	1	Island	TSS200	-6.81025185697225	9.74280275551215e-12	-5.63305546302188	2.71438428894624e-08	-3.86937059792345	0.00015187146201501
cg18529173	`	15	Island		-6.80954814858694	9.79057622441572e-12	-5.78240080439578	1.17918817446881e-08	-3.60621561739783	0.000402768154003002
cg15368769	`PQLC1;PQLC1;PQLC1	18	Island	5'UTR;5'UTR;5'UTR	-6.80825139546168	9.87921225432893e-12	-5.33196287210233	1.37726676346353e-07	-4.3930136788759	1.87003228531605e-05
cg13138952	`	17	Island		-6.80819718609384	9.88293465657469e-12	-5.29147770955143	1.70344855151917e-07	-4.46385653417282	1.38721576167524e-05
cg04489066	`EHD4	15	Island	Body	6.80745195091193	9.93424732681238e-12	7.34464593111884	6.4969357319012e-13	0.86407456513726	0.389722398644459
cg17278249	`NAP1L1;NAP1L1	12	Island	TSS200;TSS200	-6.80734323856179	9.94175442429945e-12	-5.14460919543982	3.77278073502186e-07	-4.72509084709264	4.84981978983976e-06
cg02550027	`BLOC1S2;BLOC1S2	10	Island	TSS1500;TSS200	-6.80733155433198	9.94256160584163e-12	-5.77399780239547	1.23643180375732e-08	-3.61646969612162	0.000388132249733079
cg25702790	`GNAI1	7	S_Shore	Body	-6.80727030876801	9.94679368300134e-12	-5.97139480873909	3.99805306202687e-09	-3.27039815776417	0.00129407970807089
cg12058391	`GGH;GGH	8	Island	1stExon;5'UTR	-6.80702202933855	9.96396791225239e-12	-5.14571674741487	3.77829674791031e-07	-4.63538940878182	6.63282738354665e-06
cg00178728	`GPR125	4	N_Shore	Body	6.80695722002514	9.96845574515497e-12	6.5430738270793	8.09108966351640e-11	1.91490139286508	0.057507315125613
cg04239125	`KSR1	17	Island	Body	6.80669958828558	9.98631549103785e-12	7.51916312210927	1.92869268131267e-13	0.5567065071523	0.579268210467068
cg13969321	`POLS	5	Island	TSS1500	-6.80561824876505	1.0061619466528e-11	-5.09010504589115	4.80294574300091e-07	-4.81156830414267	3.04300904531598e-06
cg02861615	`	1			-6.80463951583208	1.01302574138668e-11	-5.52252300591181	3.90431917356109e-08	-4.78935377995114	3.36111296347376e-06
cg08089543	`	4			-6.80456377965333	1.01355878266046e-11	-6.1635736674433	9.02289464667054e-10	-2.97479159139249	0.00335967305764794
cg26437123	`SEMA7A;SEMA7A;SEMA7A	15	Island	TSS200;TSS1500;TSS200	-6.80439330269151	1.01475962769425e-11	-5.48404250146275	6.19999924968913e-08	-4.27131447457264	3.6974808629686e-05
cg16038331	`CLN6	15		Body	-6.80402038346448	1.01739134373076e-11	-5.57000340788367	3.83808769179896e-08	-3.96729869348437	0.000104242861135511
cg25380351	`PSORS1C1;PSORS1C2	6		Body;Body	-6.80388483534725	1.01834957181698e-11	-5.93941937529356	3.5090877540996e-09	-3.61003986374867	0.00039725002065468
cg25698998	`KL	13	Island	TSS200	-6.80375680785846	1.01925544635003e-11	-5.42370934033804	8.46445737271484e-08	-4.22315440213315	3.771100681747e-05
cg17877449	`	6			-6.80346319059213	1.02133595445949e-11	-5.5862908464478	2.72884624598327e-08	-4.60579008468891	7.54457244882087e-06
cg16781264	`NMS	2		Body	-6.80292261345192	1.02517725295228e-11	-5.68866192283437	1.99432574745458e-08	-3.75712875601315	0.00023170692083769
cg22872812	`ZHX1;ZHX1	8	Island	TSS1500;TSS1500	-6.8025931181231	1.02752555957684e-11	-5.67176250370968	2.19079006901346e-08	-3.78608097040075	0.000207975324548969
cg14845020	`BMP7	20		Body	6.8022690930481	1.02984001870208e-11	6.22275654140631	5.75773324320796e-10	2.9638765411423	0.00347549938325505
cg03843852	`PIGB	15	Island	TSS200	-6.80215387111871	1.03066426077222e-11	-5.64600830259923	2.5268931011321e-08	-3.83033017102242	0.000176099383271515
cg15488822	`RFXAP	13	Island	1stExon	-6.80198224891188	1.03189316154534e-11	-5.61440852511294	3.00824845389979e-08	-3.88536403909621	0.000142888884397034
cg12063795	`	8	Island		-6.8011198349231	1.03809023976957e-11	-4.86346053978234	1.47980873368941e-06	-5.19969714273828	5.07665728776571e-07
cg18285492	`CIITA	16	Island	Body	6.80100336384743	1.03892995953302e-11	6.55625384967878	1.16905998946161e-10	2.23275863025601	0.0270189530301433
cg17741291	`DDX21	10	N_Shore	TSS200	-6.8005572471684	1.04215248034659e-11	-5.22956425436201	2.43782428384076e-07	-4.49825204712168	1.19842504597956e-05
cg23407507	`CXCL12;CXCL12;CXCL12	10	Island	TSS200;TSS200;TSS200	-6.80018052478924	1.04488135603205e-11	-5.09655669294886	4.64854574393502e-07	-4.7892893549855	3.36208061571731e-06
cg16993684	`GNAS;GNAS;GNAS;GNAS;GNAS;GNAS;GNAS;GNAS	20	Island	3'UTR;TSS1500;TSS1500;Body;TSS1500;3'UTR;TSS1500;Body	-6.80014765356768	1.04511979810565e-11	-4.95077117311708	9.93286255337843e-07	-4.96038417382357	1.54982256342427e-06
cg25164490	`SPSB4	3	N_Shore	Body	6.80012257478017	1.04530175107719e-11	6.18590810341042	1.13038157555687e-09	2.88003052126937	0.00449478590713919
cg03769116	`KIAA0355	19		Body	6.7998698413412	1.04713712939736e-11	6.10930958844602	1.2601179099381e-09	3.29315246712054	0.00129256710738424
cg18403480	`EXOG;EXOG	3	Island	TSS200;TSS200	-6.79979596392	1.04767423148199e-11	-5.09077024072886	4.78679997074235e-07	-4.79865443847425	3.22420493124527e-06
cg17877494	`ACAA1;ACAA1;ACAA1	3	Island	Body;Body;Body	-6.79970007857416	1.048371737593e-11	-5.45556199129398	7.1363732120427e-08	-4.15914548571781	4.88541464471337e-05
cg20502003	`	8	Island		-6.79829522667849	1.05864347039254e-11	-5.71387342514434	1.73272360701412e-08	-3.70360731890399	0.000282462481776013
cg27514703	`AKT1S1;AKT1S1;AKT1S1;AKT1S1;AKT1S1;AKT1S1;TBC1D17;TBC1D17	19	Island	5'UTR;1stExon;5'UTR;1stExon;5'UTR;1stExon;TSS200;TSS200	-6.79825569307391	1.05893394643942e-11	-6.11624958399708	1.71069171639826e-09	-2.99834354814329	0.00312171574887364
cg05891292	`POM121L12	7	Island	TSS200	6.79824266326322	1.05902970103182e-11	6.12272690935357	1.64631006200105e-09	2.98696542573927	0.00323467253807493
cg11858474	`PPIF;PPIF	10	Island	1stExon;5'UTR	-6.79796759207072	1.0610531486867e-11	-5.69654878523397	1.93243322561014e-08	-3.72844329355136	0.000257727743198135
cg15158891	`DAB1	1		Body	6.79796673935962	1.06105942718866e-11	6.5484912798998	1.26637644518202e-10	2.0900572320507	0.0390340080219197
cg00906319	`PARD3	10	Island	TSS1500	-6.79791305858149	1.06145475140496e-11	-5.06972616029537	5.32390467201764e-07	-4.83173593883221	2.77955468823633e-06
cg08503522	`SRCIN1	17		Body	6.79784320503956	1.06196939361632e-11	5.98710387483243	3.71355428539122e-09	3.23038760914533	0.00158657027069349
cg15490075	`	13	Island		-6.79745443017466	1.06483814069028e-11	-5.2102886558382	2.59795725872157e-07	-4.58446784444341	8.27492263015004e-06
cg09354692	`	6			-6.797298418626	1.06599147407394e-11	-5.98145547329484	2.54783325609942e-09	-3.77744473596468	0.000214802210594128
cg09795194	`ULK2;ULK2;ULK2;ULK2	17	Island	1stExon;5'UTR;5'UTR;1stExon	-6.79620053128061	1.07414241168977e-11	-5.58788016281829	3.48022473344021e-08	-3.92019007487667	0.000125041486326648
cg04041976	`TRIM55;TRIM55;TRIM55;TRIM55	8	N_Shelf	Body;Body;Body;Body	6.79506403946578	1.08264426507448e-11	5.2445136512482	2.17599188149716e-07	4.51966357926926	1.09364712534909e-05
cg11385961	`	15			6.79373870601969	1.09264208492193e-11	5.34698508031328	1.28716470420212e-07	4.52665526935787	1.31563922718869e-05
cg19554555	`	3	Island		-6.79330246456981	1.09595266906511e-11	-5.88939258026483	6.41556791959122e-09	-3.38592708419385	0.000874742864123774
cg17990569	`ECHDC3	10		Body	6.79322875822374	1.09651298721617e-11	6.71845422388816	4.18036073068618e-11	1.93280707089562	0.055233120586334
cg13948810	`	9			6.7924514381147	1.10243931330509e-11	6.49186944489721	1.74820405052972e-10	2.32833957632504	0.0211828076871653
cg04103317	`SUGT1P1;SPINK4	9		Body;Body	6.79236651867453	1.10308864122806e-11	6.52811687246795	1.39439221152406e-10	2.26464282885818	0.0249330376208613
cg21942430	`AK3L1;AK3L1;AK3L1	1	Island	5'UTR;TSS1500;TSS200	-6.79168410953756	1.10832023369567e-11	-5.60335527844216	3.19680784443847e-08	-3.88395603692354	0.000143658985879684
cg07600858	`AKAP8L	19	Island	Body	-6.79154045803326	1.10942461026022e-11	-5.23681237689808	2.26472617658439e-07	-4.52605063564688	1.06413674292214e-05
cg27540841	`SOCS1	16	Island	TSS200	-6.79152205310028	1.10956618319141e-11	-5.64550389769874	2.53395261031292e-08	-3.80976151555685	0.000190293572428666
cg12458361	`PNPLA8	7	Island	TSS200	-6.79090563083476	1.11431801223941e-11	-5.53276804172084	4.71053080939633e-08	-4.00460833359722	9.0149351253894e-05
cg05404618	`CBLB;CBLB	3	Island	1stExon;5'UTR	-6.7903625886591	1.11852068682146e-11	-4.88873761175452	1.34569986206887e-06	-5.04442197513157	1.05183997290187e-06
cg16849041	`DOCK5;DOCK5	8	Island	1stExon;5'UTR	-6.79011484293148	1.1204431774087e-11	-5.3169736767458	1.49027160407478e-07	-4.38268744166162	1.95265404283599e-05
cg02501479	`ZDHHC7;ZDHHC7	16	Island	TSS200;TSS200	-6.78993177533614	1.12186584919455e-11	-5.59137277126142	3.4141999186988e-08	-3.90142014823949	0.000134379502107806
cg14471569	`DIP2C	10		Body	6.78975883470231	1.12321144674936e-11	5.42987772223168	8.18981671787328e-08	4.18409920554115	4.41798405956137e-05
cg00668291	`ZNF107;ZNF107	7	Island	5'UTR;5'UTR	-6.7897344343202	1.1234014257956e-11	-5.83859200538033	8.57556942876793e-09	-3.46775809583109	0.000658669637033266
cg20625393	`SMARCAD1;SMARCAD1;SMARCAD1	4	Island	TSS1500;TSS200;TSS1500	-6.7897107717456	1.12358569040654e-11	-5.93699502476221	4.93732493007534e-09	-3.29624451631942	0.00118660266078696
cg07451641	`SRGAP3;SRGAP3	3	S_Shore	Body;Body	-6.78935667270062	1.12634666079074e-11	-5.52497818118498	4.9321844695334e-08	-4.01211827126865	8.75407606915746e-05
cg16738145	`MNS1;MNS1	15	Island	1stExon;5'UTR	-6.78917929645054	1.12773219080791e-11	-6.13121884665909	1.59547399355729e-09	-2.91676897060995	0.00422831373463365
cg15274001	`RPS21	20	Island	TSS200	-6.78896437936186	1.12941319876451e-11	-5.92593962172161	5.19990207003851e-09	-3.31312330380311	0.00112096333784298
cg07262244	`LIMS2;LIMS2;LIMS2	2	Island	TSS1500;TSS1500;5'UTR	-6.78878082656238	1.13085082917036e-11	-5.52342734011186	3.88463714565529e-08	-4.73930001802157	4.19988415525932e-06
cg08224563	`LYRM1;LYRM1;LYRM1	16	S_Shelf	5'UTR;5'UTR;5'UTR	-6.78861850518461	1.13212366334487e-11	-6.50766722398069	1.01859710432436e-10	-1.95993865126701	0.0519313430803312
cg17959631	`GCK;GCK;GCK	7	S_Shelf	Body;Body;Body	6.78793722519061	1.13748120620596e-11	5.96105053934014	4.24511970897117e-09	3.24951712527136	0.00138744550103556
cg00444120	`CASP3;CCDC111;CCDC111;CASP3	4	S_Shore	TSS1500;1stExon;5'UTR;TSS1500	-6.78754243698326	1.14059715319058e-11	-6.35988241271934	3.94745356648386e-10	-2.54974806408634	0.0117138568434763
cg10695180	`MOGAT2	11		TSS1500	6.78722629411038	1.14309840306551e-11	5.97933565930501	3.81796331754002e-09	3.21603705238372	0.00155029436289112
cg01067849	`WRNIP1;WRNIP1	6	Island	TSS200;TSS200	-6.78708221394435	1.1442401138773e-11	-6.16554067344229	1.27649017724276e-09	-2.88941288876016	0.0043685024657615
cg16046667	`C20orf117;C20orf117	20	Island	Body;Body	6.7869242609843	1.14549303814459e-11	7.0119000354626	7.15230753829582e-12	1.06209664662739	0.292326947329739
cg24006384	`PARK7;PARK7	1	Island	TSS200;TSS200	-6.78613335390478	1.15178696027942e-11	-5.45523323453594	7.14898639385852e-08	-4.13234700780081	5.4398516003768e-05
cg18234352	`UPF1	19	N_Shore	3'UTR	-6.78581841002904	1.15430265675248e-11	-5.4725160507093	5.15711009421704e-08	-4.87416838743899	2.29528548074424e-06
cg18575532	`PPP1R1B;PPP1R1B	17	S_Shore	5'UTR;Body	6.78563053078607	1.15580595360091e-11	5.34495727210956	9.92438679439741e-08	5.92620524706703	1.37034849076266e-08
cg02954711	`HCCA2;LOC338651	11	Island	Body;Body	-6.78394530937827	1.16937611535011e-11	-5.57361491068998	3.81391966499593e-08	-4.04217297760839	9.01596834997366e-05
cg15790820	`ASCL2	11	Island	TSS1500	-6.78385712531298	1.17009049397055e-11	-7.04767854688139	4.86314773910984e-12	-1.33691538303591	0.183808474371967
cg16680645	`	1	S_Shore		-6.78357647734727	1.1723668679375e-11	-5.68545171436271	2.03027699354037e-08	-3.72371859390394	0.000262269756380593
cg20139338	`CCDC88B	11		Body	6.78337635976049	1.17399269790325e-11	7.09057382767451	3.65151657776455e-12	1.26076921633604	0.209944673466856
cg27317493	`TP73;TP73;TP73;TP73	1		Body;Body;Body;Body	-6.78314951858508	1.17583831103243e-11	-6.07495574365351	2.21143190506531e-09	-3.04416703542991	0.00270251765406959
cg19036153	`NEU1;NEU1	6	Island	5'UTR;1stExon	-6.78296145907101	1.17737054541727e-11	-5.16967525039335	3.20194639369365e-07	-4.62640123409955	6.89782809873864e-06
cg12845895	`PQLC1;PQLC1;PQLC1	18	Island	Body;Body;Body	6.78285023167287	1.17827770245741e-11	6.5272512863667	1.40195946859643e-10	2.24695805529005	0.0260719610390519
cg23360000	`SARS2;MRPS12;MRPS12;MRPS12;SARS2;MRPS12;MRPS12	19	S_Shore	TSS200;5'UTR;1stExon;5'UTR;TSS200;5'UTR;1stExon	-6.78278310599213	1.17882550253113e-11	-5.84674618908739	8.18646192217944e-09	-3.43944124973729	0.000727043709476034
cg25735648	`	15			6.78255664184091	1.180675475149e-11	6.7605880837215	1.72145127471825e-11	1.04005930087434	0.300725429075201
cg14226064	`SYS1-DBNDD2;TP53TG5	20		Body;Body	6.78124999083674	1.19140510386381e-11	6.76068301637198	3.18747134028215e-11	1.83462854111435	0.0686879378975067
cg02418698	`TMPRSS9	19		TSS1500	6.78103887409832	1.19314763862236e-11	7.1045242160787	3.32558288730978e-12	1.23160394736179	0.220641826781295
cg20659463	`NDUFV2	18	Island	TSS200	-6.78020427753621	1.20006078359941e-11	-6.62142009466912	7.75342236028524e-11	-2.07658364066342	0.0395687268077812
ch.3.3299193F	`PHC3	3		Body	6.77962440329086	1.20488709287929e-11	6.31037519267453	6.74459921308421e-10	2.61478964850861	0.0101276546355556
cg11307565	`PXN;PXN	12	N_Shore	Body;Body	6.77941164361274	1.20666266096132e-11	5.66406720027168	1.65891874376554e-08	4.80683213392663	3.10829014313167e-06
cg13268919	`TSPAN4;TSPAN4;TSPAN4;TSPAN4;TSPAN4;TSPAN4;POLR2L;TSPAN4;TSPAN4;TSPAN4	11	Island	TSS1500;1stExon;5'UTR;1stExon;5'UTR;5'UTR;TSS1500;TSS1500;5'UTR;5'UTR	-6.77940484406211	1.20671944828515e-11	-5.24798046769685	2.13715510548695e-07	-4.48199103102297	1.28437709156675e-05
cg26866020	`KLHL17	1	Island	Body	-6.77935958871573	1.20709747084322e-11	-4.69949941525474	3.24934088801093e-06	-5.44313972557565	1.56991362310747e-07
cg07162257	`ALPL	1	Island	TSS200	-6.77886177121989	1.21126345519035e-11	-5.18748938193722	2.92192850948058e-07	-4.5869088322839	8.18798266886469e-06
cg13746225	`MRPS11;MRPL46;MRPS11	15	Island	TSS200;TSS200;TSS200	-6.77851563466107	1.21416839516084e-11	-5.11331080994709	4.26966666189936e-07	-4.71621199981731	4.6517267276297e-06
cg16219302	`ZNF774	15	Island	5'UTR	-6.77782881002475	1.2199527679604e-11	-5.63957531691121	2.65534559801764e-08	-3.89374560253945	0.000157631305645686
cg23207816	`CPNE1;CPNE1;CPNE1;CPNE1;CPNE1;RBM12;CPNE1;CPNE1;RBM12	20	Island	5'UTR;5'UTR;5'UTR;5'UTR;5'UTR;5'UTR;5'UTR;5'UTR;5'UTR	-6.77751149650193	1.22263426046091e-11	-5.30097733269617	1.62077547416242e-07	-4.38529106429152	1.93149800052812e-05
cg03579872	`SCP2;SCP2	1	Island	Body;Body	-6.77710343133232	1.22609114708348e-11	-4.7560377028624	2.55183511598262e-06	-5.2345527812963	4.30146970510616e-07
cg27554237	`SLC27A1	19	Island	TSS1500	-6.77680352284193	1.22863789632956e-11	-5.26166545379293	1.99030266977464e-07	-4.45275853102368	1.45400440774939e-05
cg00249030	`ADC;ADC	1	Island	1stExon;5'UTR	-6.77675087775461	1.22908547977486e-11	-6.43678282328465	2.46016664545886e-10	-2.39320134168443	0.0178819274338107
cg15286784	`C20orf199;SNORD12C;C20orf199;C20orf199;ZNFX1	20	Island	Body;TSS1500;Body;TSS200;TSS1500	-6.77630716586522	1.23286422658188e-11	-6.95377701212799	9.06072854654549e-12	-1.48624829620817	0.139721322995977
cg18734330	`C14orf139	14		TSS200	6.77561668960661	1.23876711533235e-11	5.96892876196526	4.0556477264749e-09	3.21085004557842	0.00157705574953314
cg15981620	`TYK2	19	Island	TSS200	-6.77512963416089	1.24294759946883e-11	-5.58808312825266	3.47635410698655e-08	-3.87731797264145	0.000147342977441486
cg00639195	`ADAMTS7	15	Island	Body	-6.77467972429857	1.24682153266395e-11	-5.49634120864433	5.72852199073962e-08	-4.03719237885412	7.93416816398021e-05
cg12552033	`VEZT;FGD6	12	Island	Body;TSS1500	-6.7733850085302	1.25803574286494e-11	-5.55619100372408	4.13883984371755e-08	-3.9296902213767	0.000120553283782325
cg12249234	`KSR1	17		5'UTR	-6.77161383375006	1.27353697284291e-11	-5.35823880835055	1.19890193560285e-07	-4.27303733811371	3.07573608560976e-05
cg17105886	`LRRC37B2	17	Island	Body	-6.77082960450449	1.28046011778984e-11	-6.23994093487613	8.17449826074443e-10	-2.72622861295909	0.00709899731205807
cg24353392	`CRHR1;CRHR1;CRHR1;CRHR1	17	Island	Body;Body;Body;Body	-6.77027577302953	1.28537151542646e-11	-5.04373577825728	6.06798004822884e-07	-4.82151945085157	2.91013419021001e-06
cg02442820	`TMEM109	11	N_Shore	TSS200	-6.77025558972406	1.2855508497465e-11	-5.63291728583396	2.09509994352884e-08	-4.3746817630533	2.0191064174741e-05
cg17466768	`DNAJC27	2	Island	Body	-6.77003703908353	1.28749430349586e-11	-6.18823985602151	1.11473541273412e-09	-2.81523807430078	0.00546181942214162
cg09293387	`AGPAT5	8	Island	TSS200	-6.76993388463829	1.28841260010934e-11	-5.95012645930796	4.54374456780322e-09	-3.23293550093671	0.00146600353348629
cg18408726	`	19	Island		-6.76982971477724	1.28934058712937e-11	-5.17902200604579	3.07427247678749e-07	-4.56933018156588	8.83424896517773e-06
cg19960880	`PDLIM1	10	Island	TSS200	-6.76946822794617	1.29256593770518e-11	-6.92229069628572	1.11457571904904e-11	-1.52763015335999	0.129084781993546
cg20899340	`MED13	17	Island	TSS1500	-6.76932711873502	1.29382712192465e-11	-6.27094505133002	6.77992947385732e-10	-2.66886069167205	0.00837731952775465
cg24063856	`CRHR1;CRHR1;CRHR1;CRHR1	17	S_Shore	Body;Body;Body;Body	-6.76925167005584	1.29450194996784e-11	-5.99296805779177	2.54559252858334e-09	-3.355117576339	0.000972035578719426
cg26151597	`KIF15;KIAA1143	3	Island	TSS1500;Body	-6.7690384528201	1.29641087176184e-11	-5.6579007669677	2.36588453071985e-08	-3.74266847581555	0.00024449696032142
cg18519460	`	6			6.76796443033814	1.30606853647233e-11	5.92696536154157	5.16924947792069e-09	3.26895240652274	0.00130035103730464
cg00963169	`ELAVL4	1	Island	Body	-6.76777087029993	1.30781651664528e-11	-6.21608958981527	9.43462756944994e-10	-2.76185742082477	0.00639668635725522
cg20306810	`SNORD2;EIF4A2	3	Island	TSS1500;Body	-6.76768101650698	1.30862873668591e-11	-4.64473390501519	4.20383908893862e-06	-5.51555420718724	1.09925432114937e-07
cg16803088	`KSR2	12	Island	TSS1500	-6.76753971231701	1.30990703448516e-11	-5.86206094741921	7.50162902494754e-09	-3.38184359648446	0.000887093701322183
cg03299740	`MSGN1	2		TSS200	6.76696208575359	1.31514522032514e-11	5.22326632746769	2.4553292713285e-07	4.71816821442008	5.90069473590429e-06
cg26159934	`SRPK2	7	Island	TSS200	-6.76694527184963	1.3152980035042e-11	-5.73950292102456	1.50111678072981e-08	-3.5954331141825	0.000418717458969523
cg06326072	`DLAT	11	N_Shore	TSS200	-6.76684348464272	1.31622328624254e-11	-5.93374332237208	3.6299800488372e-09	-3.51511794723754	0.000557603093392427
cg23460149	`RPN1;RPN1	3	Island	5'UTR;1stExon	-6.76664475414705	1.31803165660956e-11	-4.95589579131556	9.40160061424537e-07	-4.96813675603054	1.49568121751582e-06
cg16245510	`SYF2;SYF2	1	S_Shore	TSS200;TSS200	-6.76626266062287	1.32151539923508e-11	-5.72143277148613	1.6610182293127e-08	-3.62572458164241	0.000375353664983585
cg23855715	`SYN3;SYN3;SYN3;SYN3;SYN3	22		1stExon;5'UTR;5'UTR;5'UTR;1stExon	6.76543314828542	1.32910956070833e-11	6.36249635403673	2.37367206505344e-10	2.35024837822463	0.0200124753714022
cg05006030	`RNU5E;RNU5D;ACOT12;ACOT12	5	Island	Body;Body;5'UTR;1stExon	-6.76521642111937	1.33110072396861e-11	-5.75381889332011	1.49331063334489e-08	-3.65003135105512	0.000409141458350443
cg03537301	`MIER3	5	Island	Body	-6.76484552875305	1.33451504790554e-11	-5.836674273861	8.66966627317039e-09	-3.42089872533323	0.000775355633103971
cg07973095	`DECR2	16	Island	TSS1500	-6.76463298771327	1.33647550166762e-11	-6.3632338225065	3.86732529510427e-10	-2.49764836801856	0.0135146799935011
cg01057248	`	19	N_Shore		-6.76460720039783	1.33671355265533e-11	-5.71720661431889	1.29277554767859e-08	-4.11978339672455	5.71999029756022e-05
cg15857475	`RECQL4;LRRC14	8	Island	Body;TSS1500	-6.76410459237659	1.3413615902151e-11	-5.89001573236633	6.48281252953172e-09	-3.32654255592967	0.00107120755811621
cg16057201	`MRFAP1	4	Island	TSS200	-6.764045921539	1.34190519932197e-11	-4.62480814555416	4.72778325511573e-06	-5.42662791034248	1.70202878717971e-07
cg15621988	`SYNGR1;SYNGR1;SYNGR1	22	Island	Body;Body;Body	6.76315738149331	1.35016431012502e-11	5.83379407798402	8.81288104714336e-09	3.42254010359238	0.000770960915421436
cg00818473	`MIR574;FAM114A1	4	Island	TSS200;5'UTR	-6.76302774161524	1.35137348639885e-11	-5.65063212470315	2.46306458592989e-08	-3.74327884713871	0.000243943868842668
cg03658244	`MAPRE2;MAPRE2;MAPRE2;MAPRE2	18	N_Shore	TSS1500;TSS1500;5'UTR;Body	-6.76070410810445	1.37322721314835e-11	-5.61447583601759	2.3265009823395e-08	-4.39813990777591	1.83027257314831e-05
cg14574329	`KIF3C	2	Island	TSS200	-6.76064269352705	1.37380948619209e-11	-6.4889550639055	1.78597639517841e-10	-2.27178856774106	0.0244852993990122
cg27057210	`MBIP;MBIP;MBIP;MBIP	14		1stExon;1stExon;5'UTR;5'UTR	-6.76007739084992	1.37918050351379e-11	-4.96279537229807	9.09709126503143e-07	-4.93909239442266	1.70845850385207e-06
cg27437944	`FXR1;FXR1;FXR1	3	Island	Body;5'UTR;Body	-6.75976629055499	1.38214507731031e-11	-5.67731389485448	2.12426160681602e-08	-3.68993684855914	0.000297016450187352
cg21399510	`	3	Island		-6.75975128639606	1.38228821437367e-11	-7.54641340785912	1.59219950326816e-13	-0.414217784977494	0.679891369204526
cg04067249	`	6			-6.7593147891581	1.38645868274708e-11	-6.053660340681	1.76364772020091e-09	-3.15399740706199	0.00189980860020764
cg10192483	`PMS2L11	7	S_Shelf	Body	6.7586244555131	1.39307957488526e-11	6.82171211510692	2.14865436939974e-11	1.68201873486401	0.0948973859219411
cg07721822	`	1	N_Shore		-6.75841950821645	1.39505114972896e-11	-5.08062909936999	5.03874426323737e-07	-4.73293877997428	4.31996292065551e-06
cg20166438	`GNAI3	1	Island	TSS200	-6.75834053923029	1.39581155352631e-11	-5.57783252685141	3.67716403808953e-08	-3.86140598702545	0.000156541941815781
cg21878074	`HTR7P;HEBP1	12	Island	Body;TSS1500	-6.75811928613838	1.39794419419966e-11	-6.12525652567337	1.62181474556528e-09	-2.9015720760133	0.00420966438813826
cg03128469	`RNF187	1	Island	TSS200	-6.75803495725175	1.398757873219e-11	-5.18467509287468	2.96453267144144e-07	-4.54981712253864	9.60909772007825e-06
cg15258265	`	4	Island		-6.75796118431511	1.39947007955718e-11	-5.89100296774122	6.35659950693266e-09	-3.31179393867636	0.00112600777635587
cg18739821	`HS3ST3B1	17	Island	Body	-6.75784593712359	1.40058339056025e-11	-5.47413436868126	6.45785384123951e-08	-4.04214411009831	7.78113844316544e-05
cg02396172	`UFD1L;UFD1L;CDC45L	22	Island	TSS200;TSS200;TSS1500	-6.75779958042731	1.40103145013747e-11	-5.61687504476383	2.2950471460401e-08	-4.38266630840033	1.95282666951313e-05
cg01881524	`	5	Island		-6.75764043113647	1.40257077250416e-11	-5.55057365356249	4.26759701570969e-08	-3.90776583981473	0.000131150866805617
cg01900832	`ATP9A	20	S_Shore	TSS1500	6.75691519590783	1.40960638464938e-11	5.92558727289159	5.36612086781624e-09	3.25957736820863	0.00144285238338827
cg11149452	`GRB2;GRB2	17	Island	TSS200;TSS200	-6.75617140031942	1.41685795467916e-11	-5.33639668668033	1.3454633087686e-07	-4.28015732577156	2.98710487057929e-05
cg15970666	`	2	Island		-6.75592242207896	1.41929349852863e-11	-5.62840004446667	2.78502195988917e-08	-3.76790470241749	0.000222589708024497
cg19088859	`C1orf83;TMEM59	1	Island	TSS200;TSS200	-6.7558552562311	1.41995122725544e-11	-5.29267189010122	1.75782897961111e-07	-4.30681661188115	2.67646653576959e-05
cg04509825	`HIF1A;HIF1A;HIF1A;HIF1A	14	Island	1stExon;5'UTR;5'UTR;1stExon	-6.75571384926529	1.42133694603902e-11	-5.49888022572872	5.65041683712871e-08	-3.99447369877685	9.37870584221385e-05
cg18434712	`	1	S_Shore		-6.75554917301176	1.42295236175252e-11	-5.61313104317801	3.02947577368555e-08	-3.79391124405365	0.000201963412410113
cg16274061	`SAP30L;SAP30L;SAP30L;SAP30L	5	N_Shore	TSS1500;TSS1500;TSS1500;TSS1500	-6.75515627594003	1.42681380934034e-11	-6.17077724704495	1.23725237497811e-09	-2.81581607666984	0.00545241470011705
cg25481635	`CYB5A;CYB5A	18	Island	TSS200;TSS200	-6.7548163192002	1.43016323216472e-11	-5.96911819473544	4.14275996047177e-09	-3.16841790040545	0.00193687471275015
cg17508302	`HSPA7	1	Island	TSS200	-6.75466683937207	1.43163841802115e-11	-7.19367745206575	1.88593970538138e-12	-0.671372873853882	0.504537942734483
cg19578388	`FBXO15;FBXO15;C18orf55;FBXO15	18	Island	TSS200;1stExon;TSS1500;5'UTR	-6.75358440372665	1.44236531283526e-11	-5.13051210453964	3.91180509798184e-07	-4.63576019289469	6.62210883650385e-06
cg13796392	`NR4A3;NR4A3;NR4A3	9	Island	TSS1500;TSS1500;TSS1500	-6.75309182564205	1.44727276545332e-11	-5.47064924743155	5.21073438082353e-08	-4.78141527884931	3.48239571684825e-06
cg08543703	`MFN2;MFN2;MFN2;MFN2	1	Island	1stExon;5'UTR;1stExon;5'UTR	-6.75224368512683	1.45576095850146e-11	-4.93443483582157	1.07631699405316e-06	-4.89465614224067	2.09172562296529e-06
cg20033210	`PMPCB	7	N_Shore	TSS200	-6.75131820740874	1.46507877262888e-11	-5.30738701523718	1.62799182485452e-07	-4.27358834589564	3.06878813942908e-05
cg13895461	`CYP4V2	4	Island	TSS200	-6.75130408149222	1.46522144555026e-11	-5.62521736071015	2.87398469136036e-08	-3.86277760118387	0.000176784959043202
cg06008470	`COL19A1	6	Island	5'UTR	-6.75072346009148	1.47109755838844e-11	-5.41544449221536	8.84648805705681e-08	-4.13062942565201	5.47736203969953e-05
cg13950625	`RAP1GAP;RAP1GAP	1	Island	TSS200;TSS200	-6.75044310928149	1.47394307292397e-11	-5.39427052563204	9.903154236333e-08	-4.16717215734889	4.730136568873e-05
cg01331335	`ZNF493;ZNF493;ZNF493	19		TSS200;TSS200;TSS200	-6.74994353911344	1.47902699467758e-11	-6.00081147616491	3.58630073149358e-09	-3.10219591298827	0.00229146681965505
cg20176285	`REEP1;REEP1;REEP1;REEP1	2	Island	Body;Body;Body;Body	-6.74986751582655	1.47980215669795e-11	-5.58467944482835	3.54182045630294e-08	-3.83230974535352	0.000174787509890777
cg13691961	`DUSP6;DUSP6	12	N_Shore	Body;Body	6.74940666815244	1.48450965637187e-11	6.04139953424979	1.89988012222459e-09	3.15893707874564	0.00186951151202049
cg17222755	`	15	N_Shore		6.7492411871386	1.4862035997492e-11	5.72648361448432	1.15622866557627e-08	4.48353489376196	1.27596867957126e-05
cg02358434	`SPNS1;LAT;SPNS1;LAT;LAT;LAT;SPNS1;SPNS1;SPNS1	16		Body;TSS1500;Body;TSS1500;TSS1500;TSS1500;Body;Body;Body	6.74902171932303	1.48845309844578e-11	7.44765660904227	3.18123062721807e-13	0.565644044404033	0.573197639538795
cg06905762	`GNB2L1;SNORD95	5	N_Shore	TSS1500;TSS1500	-6.74895868934112	1.48909975854348e-11	-5.52119567160788	5.36832833295365e-08	-4.09276715817732	8.21138552471107e-05
cg06323957	`BIRC2	11	Island	TSS200	-6.7481421093129	1.49750242679235e-11	-5.27668788578273	1.84035358948623e-07	-4.36859860708282	2.07104497874993e-05
cg00871453	`WDR67;WDR67	8	N_Shore	TSS1500;TSS1500	-6.74813776863733	1.4975472164989e-11	-4.68725843110852	3.44265498546197e-06	-5.4015939464529	1.92320855344374e-07
[truncated: 8,828 more rows]
